# Supplementary material for: Extracellular Vesicles from Pancreatic Cancer Stem Cells Lead an Intratumor Communication Network (EVNet) to fuel tumour progression
Source: HighWire-hosted journal article supplement (doi:10.1136/gutjnl-2021-324994), 2022-01-10
Supplement: gutjnl-2021-324994supp009_data_supplement.pdf [file gutjnl-2021-324994supp009_data_supplement.pdf]

## Supplementary Figure 9

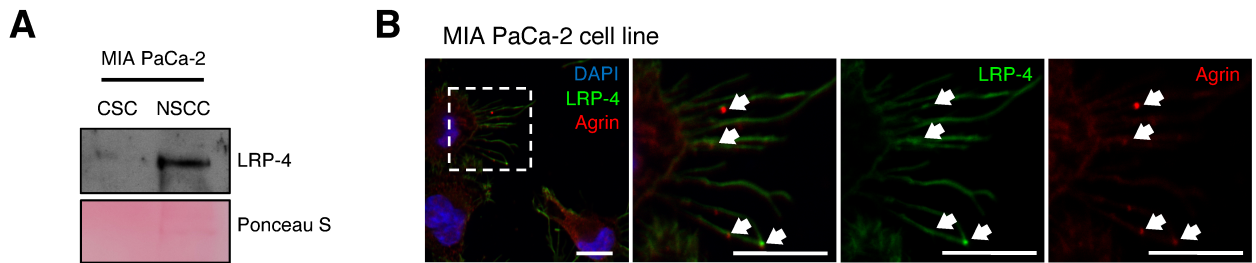

**Supplementary Figure 9 (related to Figure 6). LRP-4 receptor is enriched in NSCC.** (A) Western blot of LRP-4 in CSC and NSCC from MIA PaCa-2 cell line. Same number of cells was used for each subpopulation to perform this experiment. Ponceau S was used as loading control. (B) Representative immunofluorescence analysis of LRP-4 (green) and agrin (red) in MIA PaCa-2 cells. Nuclei stained with DAPI (blue). Arrows identify co-localization between agrin and LRP-4. Scale bar 10 $\mu$ m.
