# Supplementary material for: Extracellular Vesicles from Pancreatic Cancer Stem Cells Lead an Intratumor Communication Network (EVNet) to fuel tumour progression
Source: HighWire-hosted journal article supplement (doi:10.1136/gutjnl-2021-324994), 2022-01-10
Supplement: gutjnl-2021-324994supp013_data_supplement.pdf [file gutjnl-2021-324994supp013_data_supplement.pdf]

Supplementary Table 2.xlsx

| Cluster | class | UNIPROT    | UNIPROT_ID       | Description                                                                         | GN              |
|---------|-------|------------|------------------|-------------------------------------------------------------------------------------|-----------------|
| Cells   | sp    | A0A075B759 | PAL4E_HUMAN      | Peptidyl-prolyl cis-trans isomerase A-like 4E                                       | PPIAL4E         |
| Cells   | sp    | A0A075B767 | PAL4H_HUMAN      | Peptidyl-prolyl cis-trans isomerase A-like 4H                                       | PPIAL4H         |
| Cells   | sp    | A0A0B4J2A2 | PAL4C_HUMAN      | Peptidyl-prolyl cis-trans isomerase A-like 4C                                       | PPIAL4C         |
| Cells   | sp    | A0A0B4J2D5 | GAL3B_HUMAN      | Glutamine amidotransferase-like class 1 domain-containing protein 3B, mitochondrial | GATD3B          |
| Cells   | tr    | A0A0G2JNQ3 | A0A0G2JNQ3_HUMAN | RRM domain-containing protein                                                       | HNRNPCL2        |
| Cells   | tr    | A0A0G2JPF8 | A0A0G2JPF8_HUMAN | RRM domain-containing protein                                                       | HNRNPCL4        |
| Cells   | tr    | A0A2R8Y422 | A0A2R8Y422_HUMAN | Ubiquitin-like domain-containing protein                                            | ENSG00000231767 |
| Cells   | tr    | A0A2R8Y4L2 | A0A2R8Y4L2_HUMAN | Heterogeneous nuclear ribonucleoprotein A1 pseudogene 48                            | HNRNPA1P48      |
| Cells   | tr    | A0A3B3IRV3 | A0A3B3IRV3_HUMAN | Malignant T-cell-amplified sequence                                                 | MCTS2P          |
| Cells   | sp    | A4D1E9     | GTPBA_HUMAN      | GTP-binding protein 10                                                              | GTPBP10         |
| Cells   | sp    | A6NHG4     | DDTL_HUMAN       | D-dopachrome decarboxylase-like protein                                             | DDTL            |
| Cells   | sp    | A6NHL2     | TBAL3_HUMAN      | Tubulin alpha chain-like 3                                                          | TUBAL3          |
| Cells   | sp    | A6NIH7     | U119B_HUMAN      | Protein unc-119 homolog B                                                           | UNC119B         |
| Cells   | sp    | A8MTJ3     | GNAT3_HUMAN      | Guanine nucleotide-binding protein G(t) subunit alpha-3                             | GNAT3           |
| Cells   | sp    | A8MWD9     | RUXGL_HUMAN      | Putative small nuclear ribonucleoprotein G-like protein 15                          | SNRPGP15        |
| Cells   | sp    | B2RPK0     | HGB1A_HUMAN      | Putative high mobility group protein B1-like 1                                      | HMGBlP1         |
| Cells   | sp    | B2RXH8     | HNRC2_HUMAN      | Heterogeneous nuclear ribonucleoprotein C-like 2                                    | HNRNPCL2        |
| Cells   | sp    | B7ZW38     | HNRC3_HUMAN      | Heterogeneous nuclear ribonucleoprotein C-like 3                                    | HNRNPCL3        |
| Cells   | sp    | E9PAV3     | NACAM_HUMAN      | Nascent polypeptide-associated complex subunit alpha, muscle-specific form          | NACA            |
| Cells   | sp    | F5H284     | PAL4D_HUMAN      | Peptidyl-prolyl cis-trans isomerase A-like 4D                                       | PPIAL4D         |
| Cells   | sp    | G2XKQ0     | SUMO5_HUMAN      | Small ubiquitin-related modifier 5                                                  | SUMO1P1         |
| Cells   | sp    | O00115     | DNS2A_HUMAN      | Deoxyribonuclease-2-alpha                                                           | DNASE2          |
| Cells   | sp    | O00148     | DX39A_HUMAN      | ATP-dependent RNA helicase DDX39A                                                   | DDX39A          |
| Cells   | sp    | O00151     | PDLI1_HUMAN      | PDZ and LIM domain protein 1                                                        | PDLIM1          |
| Cells   | sp    | O00154     | BACH_HUMAN       | Cytosolic acyl coenzyme A thioester hydrolase                                       | ACOT7           |
| Cells   | sp    | O00161     | SNP23_HUMAN      | Synaptosomal-associated protein 23                                                  | SNAP23          |
| Cells   | sp    | O00170     | AIP_HUMAN        | AH receptor-interacting protein                                                     | AIP             |
| Cells   | sp    | O00193     | SMAP_HUMAN       | Small acidic protein                                                                | SMAP            |
| Cells   | sp    | O00217     | NDUS8_HUMAN      | NADH dehydrogenase [ubiquinone] iron-sulfur protein 8, mitochondrial                | NDUFS8          |
| Cells   | sp    | O00231     | PSD11_HUMAN      | 26S proteasome non-ATPase regulatory subunit 11                                     | PSMD11          |
| Cells   | sp    | O00233     | PSMD9_HUMAN      | 26S proteasome non-ATPase regulatory subunit 9                                      | PSMD9           |
| Cells   | sp    | O00244     | ATOX1_HUMAN      | Copper transport protein ATOX1                                                      | ATOX1           |
| Cells   | sp    | O00264     | PGRC1_HUMAN      | Membrane-associated progesterone receptor component 1                               | PGRMC1          |
| Cells   | sp    | O00267     | SPT5H_HUMAN      | Transcription elongation factor SPT5                                                | SUPT5H          |
| Cells   | sp    | O00273     | DFFA_HUMAN       | DNA fragmentation factor subunit alpha                                              | DFFA            |
| Cells   | sp    | O00303     | EIF3F_HUMAN      | Eukaryotic translation initiation factor 3 subunit F                                | EIF3F           |
| Cells   | sp    | O00425     | IGF2B3_HUMAN     | Insulin-like growth factor 2 mRNA-binding protein 3                                 | IGF2BP3         |
| Cells   | sp    | O00461     | GOLIM4_HUMAN     | Golgi integral membrane protein 4                                                   | GOLIM4          |
| Cells   | sp    | O00469     | PLOD2_HUMAN      | Procollagen-lysine,2-oxoglutarate 5-dioxygenase 2                                   | PLOD2           |
| Cells   | sp    | O00487     | PSDE_HUMAN       | 26S proteasome non-ATPase regulatory subunit 14                                     | PSMD14          |
| Cells   | sp    | O00625     | PIR_HUMAN        | Pirin                                                                               | PIR             |
| Cells   | sp    | O00743     | PPP6C_HUMAN      | Serine/threonine-protein phosphatase 6 catalytic subunit                            | PPP6C           |
| Cells   | sp    | O00764     | PDXK_HUMAN       | Pyridoxal kinase                                                                    | PDXK            |
| Cells   | sp    | O14561     | ACPM_HUMAN       | Acyl carrier protein, mitochondrial                                                 | NDUFAB1         |
| Cells   | sp    | O14562     | UBFD1_HUMAN      | Ubiquitin domain-containing protein UBFD1                                           | UBFD1           |
| Cells   | sp    | O14602     | IF1AY_HUMAN      | Eukaryotic translation initiation factor 1A, Y-chromosomal                          | EIF1AY          |
| Cells   | sp    | O14737     | PDCD5_HUMAN      | Programmed cell death protein 5                                                     | PDCD5           |
| Cells   | sp    | O14744     | ANM5_HUMAN       | Protein arginine N-methyltransferase 5                                              | PRMT5           |
| Cells   | sp    | O14745     | NHRF1_HUMAN      | Na(+)/H(+) exchange regulatory cofactor NHE-RF1                                     | SLC9A3R1        |
| Cells   | sp    | O14773     | TPP1_HUMAN       | Tripeptidyl-peptidase 1                                                             | TPP1            |
| Cells   | sp    | O14907     | TX1B3_HUMAN      | Tax1-binding protein 3                                                              | TAX1BP3         |
| Cells   | sp    | O14910     | LIN7A_HUMAN      | Protein lin-7 homolog A                                                             | LIN7A           |
| Cells   | sp    | O14950     | ML12B_HUMAN      | Myosin regulatory light chain 12B                                                   | MYL12B          |
| Cells   | sp    | O14964     | HGS_HUMAN        | Hepatocyte growth factor-regulated tyrosine kinase substrate                        | HGS             |
| Cells   | sp    | O14979     | HNRDL_HUMAN      | Heterogeneous nuclear ribonucleoprotein D-like                                      | HNRNPDL         |
| Cells   | sp    | O15127     | SCAM2_HUMAN      | Secretory carrier-associated membrane protein 2                                     | SCAMP2          |
| Cells   | sp    | O15143     | ARPC1B_HUMAN     | Actin-related protein 2/3 complex subunit 1B                                        | ARPC1B          |
| Cells   | sp    | O15144     | ARPC2_HUMAN      | Actin-related protein 2/3 complex subunit 2                                         | ARPC2           |
| Cells   | sp    | O15145     | ARPC3_HUMAN      | Actin-related protein 2/3 complex subunit 3                                         | ARPC3           |
| Cells   | sp    | O15173     | PGRC2_HUMAN      | Membrane-associated progesterone receptor component 2                               | PGRMC2          |
| Cells   | sp    | O15212     | PF6D_HUMAN       | Prefoldin subunit 6                                                                 | PF6D            |
| Cells   | sp    | O15347     | HMG3B_HUMAN      | High mobility group protein B3                                                      | HMG3B           |
| Cells   | sp    | O15355     | PPM1G_HUMAN      | Protein phosphatase 1G                                                              | PPM1G           |
| Cells   | sp    | O15372     | EIF3H_HUMAN      | Eukaryotic translation initiation factor 3 subunit H                                | EIF3H           |
| Cells   | sp    | O15382     | BCAT2_HUMAN      | Branched-chain-amino-acid aminotransferase, mitochondrial                           | BCAT2           |
| Cells   | sp    | O15446     | RPA34_HUMAN      | DNA-directed RNA polymerase I subunit RPA34                                         | CD3EAP          |
| Cells   | sp    | O15498     | YKT6_HUMAN       | Synaptobrevin homolog YKT6                                                          | YKT6            |
| Cells   | sp    | O15511     | ARPC5_HUMAN      | Actin-related protein 2/3 complex subunit 5                                         | ARPC5           |
| Cells   | sp    | O43169     | CYB5B_HUMAN      | Cytochrome b5 type B                                                                | CYB5B           |
| Cells   | sp    | O43290     | SNUT1_HUMAN      | U4/U6.U5 tri-snRNP-associated protein 1                                             | SART1           |
| Cells   | sp    | O43324     | MCA3_HUMAN       | Eukaryotic translation elongation factor 1 epsilon-1                                | EEF1E1          |
| Cells   | sp    | O43390     | HNRPR_HUMAN      | Heterogeneous nuclear ribonucleoprotein R                                           | HNRNPR          |
| Cells   | sp    | O43396     | TXNL1_HUMAN      | Thioredoxin-like protein 1                                                          | TXNL1           |
| Cells   | sp    | O43399     | TPD54_HUMAN      | Tumor protein D54                                                                   | TPD52L2         |
| Cells   | sp    | O43402     | EMC8_HUMAN       | ER membrane protein complex subunit 8                                               | EMC8            |
| Cells   | sp    | O43423     | AN32C_HUMAN      | Acidic leucine-rich nuclear phosphoprotein 32 family member C                       | ANP32C          |
| Cells   | sp    | O43447     | PPIH_HUMAN       | Peptidyl-prolyl cis-trans isomerase H                                               | PPIH            |
| Cells   | sp    | O43488     | ARK72_HUMAN      | Aflatoxin B1 aldehyde reductase member 2                                            | AKR7A2          |
| Cells   | sp    | O43491     | E41L2_HUMAN      | Band 4.1-like protein 2                                                             | EPB41L2         |
| Cells   | sp    | O43583     | DENR_HUMAN       | Density-regulated protein                                                           | DENR            |
| Cells   | sp    | O43598     | DNPH1_HUMAN      | 2'-deoxynucleoside 5'-phosphate N-hydrolase 1                                       | DNPH1           |
| Cells   | sp    | O43633     | CHM2A_HUMAN      | Charged multivesicular body protein 2a                                              | CHMP2A          |
| Cells   | sp    | O43670     | ZNF207_HUMAN     | BUB3-interacting and GLEBS motif-containing protein ZNF207                          | ZNF207          |
| Cells   | sp    | O43676     | NDUB3_HUMAN      | NADH dehydrogenase [ubiquinone] 1 beta subcomplex subunit 3                         | NDUFB3          |
| Cells   | sp    | O43678     | NDUA2_HUMAN      | NADH dehydrogenase [ubiquinone] 1 alpha subcomplex subunit 2                        | NDUFA2          |
| Cells   | sp    | O43681     | GET3_HUMAN       | ATPase GET3                                                                         | GET3            |
| Cells   | sp    | O43684     | BUB3_HUMAN       | Mitotic checkpoint protein BUB3                                                     | BUB3            |
| Cells   | sp    | O43709     | BUD23_HUMAN      | Probable 18S rRNA (guanine-N(7))-methyltransferase                                  | BUD23           |
| Cells   | sp    | O43752     | STX6_HUMAN       | Syntaxin-6                                                                          | STX6            |
| Cells   | sp    | O43765     | SGTA_HUMAN       | Small glutamine-rich tetratricopeptide repeat-containing protein alpha              | SGTA            |

Supplementary Table 2.xlsx

| Cluster | class | UNIPROT | UNIPROT_ID   | Description                                                                | GN        |
|---------|-------|---------|--------------|----------------------------------------------------------------------------|-----------|
| Cells   | sp    | O43768  | ENSA_HUMAN   | Alpha-endosulfine                                                          | ENSA      |
| Cells   | sp    | O43776  | SYNC_HUMAN   | Asparagine-tRNA ligase, cytoplasmic                                        | NARS1     |
| Cells   | sp    | O43809  | CPSF5_HUMAN  | Cleavage and polyadenylation specificity factor subunit 5                  | NUDT21    |
| Cells   | sp    | O43813  | LANC1_HUMAN  | Glutathione S-transferase LANC1                                            | LANCL1    |
| Cells   | sp    | O43818  | U3IP2_HUMAN  | U3 small nucleolar RNA-interacting protein 2                               | RRP9      |
| Cells   | sp    | O43852  | CALU_HUMAN   | Calumenin                                                                  | CALU      |
| Cells   | sp    | O43865  | SAHH2_HUMAN  | S-adenosylhomocysteine hydrolase-like protein 1                            | AHCLY1    |
| Cells   | sp    | O43920  | NDUS5_HUMAN  | NADH dehydrogenase [ubiquinone] iron-sulfur protein 5                      | NDUF55    |
| Cells   | sp    | O60220  | TIM8A_HUMAN  | Mitochondrial import inner membrane translocase subunit Tim8 A             | TIMM8A    |
| Cells   | sp    | O60271  | JIP4_HUMAN   | C-Jun-amino-terminal kinase-interacting protein 4                          | SPAG9     |
| Cells   | sp    | O60341  | KDM1A_HUMAN  | Lysine-specific histone demethylase 1A                                     | KDM1A     |
| Cells   | sp    | O60493  | SNX3_HUMAN   | Sorting nexin-3                                                            | SNX3      |
| Cells   | sp    | O60506  | HNRPO_HUMAN  | Heterogeneous nuclear ribonucleoprotein Q                                  | SYNCRIP   |
| Cells   | sp    | O60568  | PLOD3_HUMAN  | Multifunctional procollagen lysine hydroxylase and glycosyltransferase LH3 | PLOD3     |
| Cells   | sp    | O60664  | PLIN3_HUMAN  | Perilipin-3                                                                | PLIN3     |
| Cells   | sp    | O60701  | UGDH_HUMAN   | UDP-glucose 6-dehydrogenase                                                | UGDH      |
| Cells   | sp    | O60739  | EIF1B_HUMAN  | Eukaryotic translation initiation factor 1b                                | EIF1B     |
| Cells   | sp    | O60812  | HNRC1_HUMAN  | Heterogeneous nuclear ribonucleoprotein C-like 1                           | HNRNPCL1  |
| Cells   | sp    | O60828  | PQBP1_HUMAN  | Polyglutamine-binding protein 1                                            | PQBP1     |
| Cells   | sp    | O60832  | DKC1_HUMAN   | H/ACA ribonucleoprotein complex subunit DKC1                               | DKC1      |
| Cells   | sp    | O60841  | IF2P_HUMAN   | Eukaryotic translation initiation factor 5B                                | EIF5B     |
| Cells   | sp    | O60869  | EDF1_HUMAN   | Endothelial differentiation-related factor 1                               | EDF1      |
| Cells   | sp    | O60884  | DNJA2_HUMAN  | DnaJ homolog subfamily A member 2                                          | DNJA2     |
| Cells   | sp    | O60885  | BRD4_HUMAN   | Bromodomain-containing protein 4                                           | BRD4      |
| Cells   | sp    | O60888  | CUTA_HUMAN   | Protein CutA                                                               | CUTA      |
| Cells   | sp    | O60925  | PFD1_HUMAN   | Prefoldin subunit 1                                                        | PFDN1     |
| Cells   | sp    | O75131  | CPNE3_HUMAN  | Copine-3                                                                   | CPNE3     |
| Cells   | sp    | O75223  | GGCT_HUMAN   | Gamma-glutamylcyclotransferase                                             | GGCT      |
| Cells   | sp    | O75306  | NDUS2_HUMAN  | NADH dehydrogenase [ubiquinone] iron-sulfur protein 2, mitochondrial       | NDUF52    |
| Cells   | sp    | O75312  | ZPR1_HUMAN   | Zinc finger protein ZPR1                                                   | ZPR1      |
| Cells   | sp    | O75340  | PDCD6_HUMAN  | Programmed cell death protein 6                                            | PDCD6     |
| Cells   | sp    | O75347  | TBCA_HUMAN   | Tubulin-specific chaperone A                                               | TBCA      |
| Cells   | sp    | O75348  | VATG1_HUMAN  | V-type proton ATPase subunit G 1                                           | ATP6V1G1  |
| Cells   | sp    | O75351  | VPS4B_HUMAN  | Vacuolar protein sorting-associated protein 4B                             | VPS4B     |
| Cells   | sp    | O75367  | H2AY_HUMAN   | Core histone macro-H2A.1                                                   | MACROH2A1 |
| Cells   | sp    | O75381  | PEX14_HUMAN  | Peroxisomal membrane protein PEX14                                         | PEX14     |
| Cells   | sp    | O75390  | CISY_HUMAN   | Citrate synthase, mitochondrial                                            | CS        |
| Cells   | sp    | O75438  | NDUB1_HUMAN  | NADH dehydrogenase [ubiquinone] 1 beta subcomplex subunit 1                | NDUFB1    |
| Cells   | sp    | O75439  | MPPB_HUMAN   | Mitochondrial-processing peptidase subunit beta                            | PMPCB     |
| Cells   | sp    | O75475  | PSIP1_HUMAN  | PC4 and SFRS1-interacting protein                                          | PSIP1     |
| Cells   | sp    | O75489  | NDUS3_HUMAN  | NADH dehydrogenase [ubiquinone] iron-sulfur protein 3, mitochondrial       | NDUF53    |
| Cells   | sp    | O75494  | SRSF10_HUMAN | Serine/arginine-rich splicing factor 10                                    | SRSF10    |
| Cells   | sp    | O75521  | ECI2_HUMAN   | Enoyl-CoA delta isomerase 2, mitochondrial                                 | ECI2      |
| Cells   | sp    | O75531  | BAF_HUMAN    | Barrier-to-autointegration factor                                          | BANF1     |
| Cells   | sp    | O75607  | NPM3_HUMAN   | Nucleoplasm-in-3                                                           | NPM3      |
| Cells   | sp    | O75608  | LYPA1_HUMAN  | Acyl-protein thioesterase 1                                                | LYPA1     |
| Cells   | sp    | O75822  | EIF3J_HUMAN  | Eukaryotic translation initiation factor 3 subunit J                       | EIF3J     |
| Cells   | sp    | O75828  | CBR3_HUMAN   | Carbonyl reductase [NADPH] 3                                               | CBR3      |
| Cells   | sp    | O75844  | FACE1_HUMAN  | CAAX prenyl protease 1 homolog                                             | ZMPSTE24  |
| Cells   | sp    | O75880  | SCO1_HUMAN   | Protein SCO1 homolog, mitochondrial                                        | SCO1      |
| Cells   | sp    | O75935  | DCTN3_HUMAN  | Dynactin subunit 3                                                         | DCTN3     |
| Cells   | sp    | O75937  | DNJC8_HUMAN  | DnaJ homolog subfamily C member 8                                          | DNJAUC8   |
| Cells   | sp    | O75940  | SPF30_HUMAN  | Survival of motor neuron-related-splicing factor 30                        | SMINDC1   |
| Cells   | sp    | O75947  | ATP5H_HUMAN  | ATP synthase subunit d, mitochondrial                                      | ATP5PD    |
| Cells   | sp    | O75964  | ATP5L_HUMAN  | ATP synthase subunit g, mitochondrial                                      | ATP5MG    |
| Cells   | sp    | O76003  | GLRX3_HUMAN  | Glutaredoxin-3                                                             | GLRX3     |
| Cells   | sp    | O94903  | PLPHP_HUMAN  | Pyridoxal phosphate homeostasis protein                                    | PLPBP     |
| Cells   | sp    | O94979  | SC31A_HUMAN  | Protein transport protein Sec31A                                           | SEC31A    |
| Cells   | sp    | O95104  | SCAF4_HUMAN  | SR-related and CTD-associated factor 4                                     | SCAF4     |
| Cells   | sp    | O95168  | NDUB4_HUMAN  | NADH dehydrogenase [ubiquinone] 1 beta subcomplex subunit 4                | NDUFB4    |
| Cells   | sp    | O95197  | RTN3_HUMAN   | Reticulon-3                                                                | RTN3      |
| Cells   | sp    | O95202  | LETM1_HUMAN  | Mitochondrial proton/calcium exchanger protein                             | LETM1     |
| Cells   | sp    | O95218  | ZRAB2_HUMAN  | Zinc finger Ran-binding domain-containing protein 2                        | ZRANB2    |
| Cells   | sp    | O95292  | VAPB_HUMAN   | Vesicle-associated membrane protein-associated protein B/C                 | VAPB      |
| Cells   | sp    | O95297  | MPZL1_HUMAN  | Myelin protein zero-like protein 1                                         | MPZL1     |
| Cells   | sp    | O95302  | FKBP9_HUMAN  | Peptidyl-prolyl cis-trans isomerase FKBP9                                  | FKBP9     |
| Cells   | sp    | O95399  | UTS2_HUMAN   | Urotensin-2                                                                | UTS2      |
| Cells   | sp    | O95571  | ETHE1_HUMAN  | Persulfide dioxygenase ETHE1, mitochondrial                                | ETHE1     |
| Cells   | sp    | O95626  | ANP32D_HUMAN | Acidic leucine-rich nuclear phosphoprotein 32 family member D              | ANP32D    |
| Cells   | sp    | O95716  | RAB3D_HUMAN  | Ras-related protein Rab-3D                                                 | RAB3D     |
| Cells   | sp    | O95721  | SNP29_HUMAN  | Synaptosomal-associated protein 29                                         | SNAP29    |
| Cells   | sp    | O95757  | HS74L_HUMAN  | Heat shock 70 kDa protein 4L                                               | HSPA4L    |
| Cells   | sp    | O95758  | PTBP3_HUMAN  | Polypyrimidine tract-binding protein 3                                     | PTBP3     |
| Cells   | sp    | O95777  | LSM8_HUMAN   | U6 snRNA-associated Sm-like protein LSM8                                   | LSM8      |
| Cells   | sp    | O95793  | STAU1_HUMAN  | Double-stranded RNA-binding protein Staufen homolog 1                      | STAU1     |
| Cells   | sp    | O95817  | BAG3_HUMAN   | BAG family molecular chaperone regulator 3                                 | BAG3      |
| Cells   | sp    | O95831  | AIFM1_HUMAN  | Apoptosis-inducing factor 1, mitochondrial                                 | AIFM1     |
| Cells   | sp    | O95881  | TXND12_HUMAN | Thioredoxin domain-containing protein 12                                   | TXND12    |
| Cells   | sp    | O96000  | NDUBA_HUMAN  | NADH dehydrogenase [ubiquinone] 1 beta subcomplex subunit 10               | NDUFB10   |
| Cells   | sp    | O96008  | TOM40_HUMAN  | Mitochondrial import receptor subunit TOM40 homolog                        | TOMM40    |
| Cells   | sp    | O96019  | ACL6A_HUMAN  | Actin-like protein 6A                                                      | ACTL6A    |
| Cells   | sp    | P00367  | DHE3_HUMAN   | Glutamate dehydrogenase 1, mitochondrial                                   | GLUD1     |
| Cells   | sp    | P00387  | NBSR3_HUMAN  | NADH-cytochrome b5 reductase 3                                             | CVBSR3    |
| Cells   | sp    | P00390  | GSHR_HUMAN   | Glutathione reductase, mitochondrial                                       | GSR       |
| Cells   | sp    | P00403  | COX2_HUMAN   | Cytochrome c oxidase subunit 2                                             | MT-CO2    |
| Cells   | sp    | P00491  | PNPH_HUMAN   | Purine nucleoside phosphorylase                                            | PNP       |
| Cells   | sp    | P00492  | HPRT_HUMAN   | Hypoxanthine-guanine phosphoribosyltransferase                             | HPRT1     |
| Cells   | sp    | P00505  | AATM_HUMAN   | Aspartate aminotransferase, mitochondrial                                  | GOT2      |
| Cells   | sp    | P00533  | EGFR_HUMAN   | Epidermal growth factor receptor                                           | EGFR      |
| Cells   | sp    | P00568  | KAD1_HUMAN   | Adenylate kinase isoenzyme 1                                               | AK1       |

Supplementary Table 2.xlsx

| Cluster | class | UNIPROT | UNIPROT_ID  | Description                                                                         | GN       |
|---------|-------|---------|-------------|-------------------------------------------------------------------------------------|----------|
| Cells   | sp    | P01111  | RASN_HUMAN  | GTPase NRas                                                                         | NRAS     |
| Cells   | sp    | P01112  | RASH_HUMAN  | GTPase HRas                                                                         | HRAS     |
| Cells   | sp    | P01116  | RASK_HUMAN  | GTPase KRas                                                                         | KRAS     |
| Cells   | sp    | P01893  | HLAH_HUMAN  | Putative HLA class I histocompatibility antigen, alpha chain H                      | HLA-H    |
| Cells   | sp    | P02545  | LMNA_HUMAN  | Prelamin-A/C                                                                        | LMNA     |
| Cells   | sp    | P02794  | FRIH_HUMAN  | Ferritin heavy chain                                                                | FTL1     |
| Cells   | sp    | P04040  | CATA_HUMAN  | Catalase                                                                            | CAT      |
| Cells   | sp    | P04080  | CYTB_HUMAN  | Cystatin-B                                                                          | CSTB     |
| Cells   | sp    | P04083  | ANXA1_HUMAN | Annexin A1                                                                          | ANXA1    |
| Cells   | sp    | P04179  | SODM_HUMAN  | Superoxide dismutase [Mn], mitochondrial                                            | SOD2     |
| Cells   | sp    | P04181  | OAT_HUMAN   | Ornithine aminotransferase, mitochondrial                                           | OAT      |
| Cells   | sp    | P04439  | HLLA_HUMAN  | HLA class I histocompatibility antigen, A alpha chain                               | HLA-A    |
| Cells   | sp    | P04632  | CPNS1_HUMAN | Calpain small subunit 1                                                             | CAPNS1   |
| Cells   | sp    | P04792  | HSPB1_HUMAN | Heat shock protein beta-1                                                           | HSPB1    |
| Cells   | sp    | P04843  | RPN1_HUMAN  | Dolichyl-diphosphooligosaccharide-protein glycosyltransferase subunit 1             | RPN1     |
| Cells   | sp    | P04899  | GNAI2_HUMAN | Guanine nucleotide-binding protein G(i) subunit alpha-2                             | GNAI2    |
| Cells   | sp    | P05023  | AT1A1_HUMAN | Sodium/potassium-transporting ATPase subunit alpha-1                                | ATP1A1   |
| Cells   | sp    | P05026  | AT1B1_HUMAN | Sodium/potassium-transporting ATPase subunit beta-1                                 | ATP1B1   |
| Cells   | sp    | P05062  | ALDOB_HUMAN | Fructose-bisphosphate aldolase B                                                    | ALDOB    |
| Cells   | sp    | P05067  | A4_HUMAN    | Amyloid-beta precursor protein                                                      | APP      |
| Cells   | sp    | P05114  | HMGN1_HUMAN | Non-histone chromosomal protein HMG-14                                              | HMGN1    |
| Cells   | sp    | P05161  | ISG15_HUMAN | Ubiquitin-like protein ISG15                                                        | ISG15    |
| Cells   | sp    | P05204  | HMGN2_HUMAN | Non-histone chromosomal protein HMG-17                                              | HMGN2    |
| Cells   | sp    | P05362  | ICAM1_HUMAN | Intercellular adhesion molecule 1                                                   | ICAM1    |
| Cells   | sp    | P05386  | RLA1_HUMAN  | 60S acidic ribosomal protein P1                                                     | RPLP1    |
| Cells   | sp    | P05387  | RLA2_HUMAN  | 60S acidic ribosomal protein P2                                                     | RPLP2    |
| Cells   | sp    | P05388  | RLA0_HUMAN  | 60S acidic ribosomal protein P0                                                     | RPLP0    |
| Cells   | sp    | P05455  | LA_HUMAN    | Lupus La protein                                                                    | SSB      |
| Cells   | sp    | P05556  | ITB1_HUMAN  | Integrin beta-1                                                                     | ITGB1    |
| Cells   | sp    | P05976  | MYL1_HUMAN  | Myosin light chain 1/3, skeletal muscle isoform                                     | MYL1     |
| Cells   | sp    | P06132  | DCUP_HUMAN  | Uroporphyrinogen decarboxylase                                                      | UROD     |
| Cells   | sp    | P06576  | ATPB_HUMAN  | ATP synthase subunit beta, mitochondrial                                            | ATP5F1B  |
| Cells   | sp    | P06703  | S10A6_HUMAN | Protein S100-A6                                                                     | S100A6   |
| Cells   | sp    | P06730  | IF4E_HUMAN  | Eukaryotic translation initiation factor 4E                                         | EIF4E    |
| Cells   | sp    | P06753  | TPM3_HUMAN  | Tropomyosin alpha-3 chain                                                           | TPM3     |
| Cells   | sp    | P07099  | HYPE_HUMAN  | Epoxide hydrolase 1                                                                 | EPHX1    |
| Cells   | sp    | P07108  | ACBP_HUMAN  | Acy-CoA-binding protein                                                             | DBI      |
| Cells   | sp    | P07203  | GPX1_HUMAN  | Glutathione peroxidase 1                                                            | GPX1     |
| Cells   | sp    | P07205  | PGK2_HUMAN  | Phosphoglycerate kinase 2                                                           | PGK2     |
| Cells   | sp    | P07237  | PDIA1_HUMAN | Protein disulfide-isomerase                                                         | P4HB     |
| Cells   | sp    | P07305  | H10_HUMAN   | Histone H1.0                                                                        | H1-0     |
| Cells   | sp    | P07311  | ACYP1_HUMAN | Acyolphosphatase-1                                                                  | ACYP1    |
| Cells   | sp    | P07602  | SAP_HUMAN   | Prosaposin                                                                          | PSAP     |
| Cells   | sp    | P07686  | HEXB_HUMAN  | Beta-hexosaminidase subunit beta                                                    | HEXB     |
| Cells   | sp    | P07741  | APT_HUMAN   | Adenine phosphoribosyltransferase                                                   | APRT     |
| Cells   | sp    | P07814  | SYEP_HUMAN  | Bifunctional glutamate/proline-tRNA ligase                                          | EPRS1    |
| Cells   | sp    | P07858  | CATB_HUMAN  | Cathepsin B                                                                         | CTSB     |
| Cells   | sp    | P07910  | HNRPC_HUMAN | Heterogeneous nuclear ribonucleoproteins C1/C2                                      | HNRNPC   |
| Cells   | sp    | P07951  | TPM2_HUMAN  | Tropomyosin beta chain                                                              | TPM2     |
| Cells   | sp    | P07954  | FUMH_HUMAN  | Fumarate hydratase, mitochondrial                                                   | FH       |
| Cells   | sp    | P08134  | RHOC_HUMAN  | Rho-related GTP-binding protein RhoC                                                | RHOC     |
| Cells   | sp    | P08174  | DAF_HUMAN   | Complement decay-accelerating factor                                                | CD55     |
| Cells   | sp    | P08195  | 4F2_HUMAN   | 4F2 cell-surface antigen heavy chain                                                | SLC3A2   |
| Cells   | sp    | P08559  | ODPA_HUMAN  | Pyruvate dehydrogenase E1 component subunit alpha, somatic form, mitochondrial      | PDHA1    |
| Cells   | sp    | P08574  | CY1_HUMAN   | Cytochrome c1, heme protein, mitochondrial                                          | CYC1     |
| Cells   | sp    | P08579  | RU2B_HUMAN  | U2 small nuclear ribonucleoprotein B''                                              | SNRNP2   |
| Cells   | sp    | P08590  | MYL3_HUMAN  | Myosin light chain 3                                                                | MYL3     |
| Cells   | sp    | P08621  | RU17_HUMAN  | U1 small nuclear ribonucleoprotein 70 kDa                                           | SNRNP70  |
| Cells   | sp    | P08708  | RS17_HUMAN  | 40S ribosomal protein S17                                                           | RPS17    |
| Cells   | sp    | P08754  | GNAI3_HUMAN | Guanine nucleotide-binding protein G(i) subunit alpha                               | GNAI3    |
| Cells   | sp    | P08758  | ANXA5_HUMAN | Annexin A5                                                                          | ANXA5    |
| Cells   | sp    | P08962  | CD63_HUMAN  | CD63 antigen                                                                        | CD63     |
| Cells   | sp    | P09012  | SNRPA_HUMAN | U1 small nuclear ribonucleoprotein A                                                | SNRPA    |
| Cells   | sp    | P09234  | RU1C_HUMAN  | U1 small nuclear ribonucleoprotein C                                                | SNRPC    |
| Cells   | sp    | P09382  | LEG1_HUMAN  | Galectin-1                                                                          | LGALS1   |
| Cells   | sp    | P09429  | HMGB1_HUMAN | High mobility group protein B1                                                      | HMGB1    |
| Cells   | sp    | P09471  | GNAO_HUMAN  | Guanine nucleotide-binding protein G(o) subunit alpha                               | GNAO1    |
| Cells   | sp    | P09493  | TPM1_HUMAN  | Tropomyosin alpha-1 chain                                                           | TPM1     |
| Cells   | sp    | P09496  | CLCA_HUMAN  | Clathrin light chain A                                                              | CLTA     |
| Cells   | sp    | P09525  | ANXA4_HUMAN | Annexin A4                                                                          | ANXA4    |
| Cells   | sp    | P09543  | CN37_HUMAN  | 2',3'-cyclic-nucleotide 3'-phosphodiesterase                                        | CNP      |
| Cells   | sp    | P09622  | DLDH_HUMAN  | Dihydrolipoyl dehydrogenase, mitochondrial                                          | DLD      |
| Cells   | sp    | P09651  | ROA1_HUMAN  | Heterogeneous nuclear ribonucleoprotein A1                                          | HNRNPA1  |
| Cells   | sp    | P09661  | RU2A_HUMAN  | U2 small nuclear ribonucleoprotein A'                                               | SNRPA1   |
| Cells   | sp    | P09669  | COX6C_HUMAN | Cytochrome c oxidase subunit 6C                                                     | COX6C    |
| Cells   | sp    | P09874  | PARP1_HUMAN | Poly [ADP-ribose] polymerase 1                                                      | PARP1    |
| Cells   | sp    | P09960  | LKHA4_HUMAN | Leukotriene A-4 hydrolase                                                           | LTA4H    |
| Cells   | sp    | P0C7P4  | UCRIL_HUMAN | Putative cytochrome b-c1 complex subunit Rieske-like protein 1                      | UCRCF5P1 |
| Cells   | sp    | P0CB38  | PAB4L_HUMAN | Polyadenylate-binding protein 4-like                                                | PABPC4L  |
| Cells   | sp    | P0DME0  | SETLP_HUMAN | Protein SETSIP                                                                      | SETSIP   |
| Cells   | sp    | P0DMR1  | HNR4_HUMAN  | Heterogeneous nuclear ribonucleoprotein C-like 4                                    | HNRNPCL4 |
| Cells   | sp    | P0DN26  | PAL4F_HUMAN | Peptidyl-prolyl cis-trans isomerase A-like 4F                                       | PPIAL4F  |
| Cells   | sp    | P0DN37  | PAL4G_HUMAN | Peptidyl-prolyl cis-trans isomerase A-like 4G                                       | PPIAL4G  |
| Cells   | sp    | P0DN76  | U2AF5_HUMAN | Splicing factor U2AF 35 kDa subunit-like protein                                    | U2AF1L5  |
| Cells   | sp    | P0DP23  | CALM1_HUMAN | Calmodulin-1                                                                        | CALM1    |
| Cells   | sp    | P0DP24  | CALM2_HUMAN | Calmodulin-2                                                                        | CALM2    |
| Cells   | sp    | P0DP25  | CALM3_HUMAN | Calmodulin-3                                                                        | CALM3    |
| Cells   | sp    | P0DP12  | GAL3A_HUMAN | Glutamine amidotransferase-like class 1 domain-containing protein 3A, mitochondrial | GATD3A   |
| Cells   | sp    | P10114  | RAP2A_HUMAN | Ras-related protein Rap-2a                                                          | RAP2A    |
| Cells   | sp    | P10253  | LYAG_HUMAN  | Lysosomal alpha-glucosidase                                                         | GAA      |

Supplementary Table 2.xlsx

| Cluster | class | UNIPROT | UNIPROT_ID   | Description                                                                                              | GN      |
|---------|-------|---------|--------------|----------------------------------------------------------------------------------------------------------|---------|
| Cells   | sp    | P10321  | HLAC_HUMAN   | HLA class I histocompatibility antigen, C alpha chain                                                    | HLA-C   |
| Cells   | sp    | P10412  | H14_HUMAN    | Histone H1.4                                                                                             | H1-4    |
| Cells   | sp    | P10515  | ODP2_HUMAN   | Dihydrolypoyllysine-residue acetyltransferase component of pyruvate dehydrogenase complex, mitochondrial | DLAT    |
| Cells   | sp    | P10599  | THIO_HUMAN   | Thioredoxin                                                                                              | TXN     |
| Cells   | sp    | P10606  | COX5B_HUMAN  | Cytochrome c oxidase subunit 5B, mitochondrial                                                           | COX5B   |
| Cells   | sp    | P10619  | PPGB_HUMAN   | Lysosomal protective protein                                                                             | CTSA    |
| Cells   | sp    | P10768  | ESTD_HUMAN   | S-formylglutathione hydrolase                                                                            | ESD     |
| Cells   | sp    | P10809  | CH60_HUMAN   | 60 kDa heat shock protein, mitochondrial                                                                 | HSPD1   |
| Cells   | sp    | P11177  | ODPB_HUMAN   | Pyruvate dehydrogenase E1 component subunit beta, mitochondrial                                          | PDHB    |
| Cells   | sp    | P11233  | RALA_HUMAN   | Ras-related protein Ral-A                                                                                | RALA    |
| Cells   | sp    | P11279  | LAMP1_HUMAN  | Lysosome-associated membrane glycoprotein 1                                                              | LAMP1   |
| Cells   | sp    | P11413  | G6PD_HUMAN   | Glucose-6-phosphate 1-dehydrogenase                                                                      | G6PD    |
| Cells   | sp    | P11441  | UBL4A_HUMAN  | Ubiquitin-like protein 4A                                                                                | UBL4A   |
| Cells   | sp    | P11488  | GNAT1_HUMAN  | Guanine nucleotide-binding protein G(t) subunit alpha-1                                                  | GNAT1   |
| Cells   | sp    | P11908  | PRPS2_HUMAN  | Ribose-phosphate pyrophosphokinase 2                                                                     | PRPS2   |
| Cells   | sp    | P11940  | PABP1_HUMAN  | Polyadenylate-binding protein 1                                                                          | PABPC1  |
| Cells   | sp    | P12004  | PCNA_HUMAN   | Proliferating cell nuclear antigen                                                                       | PCNA    |
| Cells   | sp    | P12081  | HARS1_HUMAN  | Histidine-tRNA ligase, cytoplasmic                                                                       | HARS1   |
| Cells   | sp    | P12268  | IMDH2_HUMAN  | Inosine-5'-monophosphate dehydrogenase 2                                                                 | IMPDH2  |
| Cells   | sp    | P12270  | TPR_HUMAN    | Nucleoprotein TPR                                                                                        | TPR     |
| Cells   | sp    | P12532  | KCRU_HUMAN   | Creatine kinase U-type, mitochondrial                                                                    | CKMT1B  |
| Cells   | sp    | P12830  | CADH1_HUMAN  | Cadherin-1                                                                                               | CDH1    |
| Cells   | sp    | P12931  | SRC_HUMAN    | Proto-oncogene tyrosine-protein kinase Src                                                               | SRC     |
| Cells   | sp    | P12956  | XRCC6_HUMAN  | X-ray repair cross-complementing protein 6                                                               | XRCC6   |
| Cells   | sp    | P13051  | UNG_HUMAN    | Uracil-DNA glycosylase                                                                                   | UNG     |
| Cells   | sp    | P13073  | COX41_HUMAN  | Cytochrome c oxidase subunit 4 isoform 1, mitochondrial                                                  | COX41   |
| Cells   | sp    | P13164  | IFITM1_HUMAN | Interferon-induced transmembrane protein 1                                                               | IFITM1  |
| Cells   | sp    | P13473  | LAMP2_HUMAN  | Lysosome-associated membrane glycoprotein 2                                                              | LAMP2   |
| Cells   | sp    | P13489  | RINI_HUMAN   | Ribonuclease inhibitor                                                                                   | RNH1    |
| Cells   | sp    | P13637  | AT1A3_HUMAN  | Sodium/potassium-transporting ATPase subunit alpha-3                                                     | ATP1A3  |
| Cells   | sp    | P13667  | PDIA4_HUMAN  | Protein disulfide-isomerase A4                                                                           | PDIA4   |
| Cells   | sp    | P13674  | P4HA1_HUMAN  | Prolyl 4-hydroxylase subunit alpha-1                                                                     | P4HA1   |
| Cells   | sp    | P13693  | TCTP_HUMAN   | Translationaly-controlled tumor protein                                                                  | TPT1    |
| Cells   | sp    | P13797  | PLST_HUMAN   | Plastin-3                                                                                                | PLS3    |
| Cells   | sp    | P13798  | ACPH_HUMAN   | Acylamino-acid-releasing enzyme                                                                          | APEH    |
| Cells   | sp    | P13804  | ETFA_HUMAN   | Electron transfer flavoprotein subunit alpha, mitochondrial                                              | ETFA    |
| Cells   | sp    | P13861  | KAP2_HUMAN   | cAMP-dependent protein kinase type II-alpha regulatory subunit                                           | PRKAR2A |
| Cells   | sp    | P13984  | T2FB_HUMAN   | General transcription factor IIF subunit 2                                                               | GTTF2F  |
| Cells   | sp    | P13995  | MTDC_HUMAN   | Bifunctional methylenetetrahydrofolate dehydrogenase/cyclohydrolase, mitochondrial                       | MTHFD2  |
| Cells   | sp    | P14314  | GLU2B_HUMAN  | Glucosidase 2 subunit beta                                                                               | PRKCSH  |
| Cells   | sp    | P14406  | CX7A2_HUMAN  | Cytochrome c oxidase subunit 7A2, mitochondrial                                                          | COX7A2  |
| Cells   | sp    | P14649  | MYL6B_HUMAN  | Myosin light chain 6B                                                                                    | MYL6B   |
| Cells   | sp    | P14678  | R SMB_HUMAN  | Small nuclear ribonucleoprotein-associated proteins B and B'                                             | SNRPB   |
| Cells   | sp    | P14866  | HNRPL_HUMAN  | Heterogeneous nuclear ribonucleoprotein L                                                                | HNRNPL  |
| Cells   | sp    | P14927  | QCR7_HUMAN   | Cytochrome b-c1 complex subunit 7                                                                        | UQCRCB  |
| Cells   | sp    | P15153  | RAC2_HUMAN   | Ras-related C3 botulinum toxin substrate 2                                                               | RAC2    |
| Cells   | sp    | P15170  | ERF3A_HUMAN  | Eukaryotic peptide chain release factor GTP-binding subunit ERF3A                                        | GSPT1   |
| Cells   | sp    | P15374  | UCHL3_HUMAN  | Ubiquitin carboxyl-terminal hydrolase isozyme L3                                                         | UCHL3   |
| Cells   | sp    | P15586  | GNS_HUMAN    | N-acetylglucosamine-6-sulfatase                                                                          | GNS     |
| Cells   | sp    | P15927  | RFA2_HUMAN   | Replication protein A 32 kDa subunit                                                                     | RPA2    |
| Cells   | sp    | P15954  | COX7C_HUMAN  | Cytochrome c oxidase subunit 7C, mitochondrial                                                           | COX7C   |
| Cells   | sp    | P16070  | CD44_HUMAN   | CD44 antigen                                                                                             | CD44    |
| Cells   | sp    | P16152  | CBR1_HUMAN   | Carbonyl reductase [NADPH] 1                                                                             | CBR1    |
| Cells   | sp    | P16278  | BGAL_HUMAN   | Beta-galactosidase                                                                                       | GLB1    |
| Cells   | sp    | P16298  | PP2BB_HUMAN  | Serine/threonine-protein phosphatase 2B catalytic subunit beta isoform                                   | PPP3CB  |
| Cells   | sp    | P16402  | H13_HUMAN    | Histone H1.3                                                                                             | H1-3    |
| Cells   | sp    | P16403  | H12_HUMAN    | Histone H1.2                                                                                             | H1-2    |
| Cells   | sp    | P16930  | FAAA_HUMAN   | Fumarylacetoacetase                                                                                      | FAH     |
| Cells   | sp    | P16949  | STMN1_HUMAN  | Stathmin                                                                                                 | STMN1   |
| Cells   | sp    | P16989  | YBOX3_HUMAN  | Y-box-binding protein 3                                                                                  | YBX3    |
| Cells   | sp    | P17096  | HMGAI_HUMAN  | High mobility group protein HMG-I/HMG-Y                                                                  | HMGAI   |
| Cells   | sp    | P17174  | AATC_HUMAN   | Aspartate aminotransferase, cytoplasmic                                                                  | GOT1    |
| Cells   | sp    | P17301  | ITA2_HUMAN   | Integrin alpha-2                                                                                         | ITGA2   |
| Cells   | sp    | P17931  | LEG3_HUMAN   | Galectin-3                                                                                               | LGALS3  |
| Cells   | sp    | P17980  | PRS6A_HUMAN  | 26S proteasome regulatory subunit 6A                                                                     | PSMC3   |
| Cells   | sp    | P18031  | PTN1_HUMAN   | Tyrosine-protein phosphatase non-receptor type 1                                                         | PTPN1   |
| Cells   | sp    | P18077  | RL35A_HUMAN  | 60S ribosomal protein L35a                                                                               | RPL35A  |
| Cells   | sp    | P18085  | ARF4_HUMAN   | ADP-ribosylation factor 4                                                                                | ARF4    |
| Cells   | sp    | P18124  | RL7_HUMAN    | 60S ribosomal protein L7                                                                                 | RPL7    |
| Cells   | sp    | P18564  | ITB6_HUMAN   | Integrin beta-6                                                                                          | ITGB6   |
| Cells   | sp    | P18615  | NELFE_HUMAN  | Negative elongation factor E                                                                             | NELFE   |
| Cells   | sp    | P18754  | RCC1_HUMAN   | Regulator of chromosome condensation                                                                     | RCC1    |
| Cells   | sp    | P18827  | SDC1_HUMAN   | Syndecan-1                                                                                               | SDC1    |
| Cells   | sp    | P18859  | ATP5J_HUMAN  | ATP synthase-coupling factor 6, mitochondrial                                                            | ATP5PF  |
| Cells   | sp    | P19087  | GNAT2_HUMAN  | Guanine nucleotide-binding protein G(t) subunit alpha-2                                                  | GNAT2   |
| Cells   | sp    | P19105  | ML12A_HUMAN  | Myosin regulatory light chain 12A                                                                        | MYL12A  |
| Cells   | sp    | P19256  | LFA3_HUMAN   | Lymphocyte function-associated antigen 3                                                                 | CD58    |
| Cells   | sp    | P19338  | NUCL_HUMAN   | Nucleolin                                                                                                | NCL     |
| Cells   | sp    | P19388  | RPAB1_HUMAN  | DNA-directed RNA polymerases I, II, and III subunit RPABC1                                               | POLR2E  |
| Cells   | sp    | P19404  | NDUV2_HUMAN  | NADH dehydrogenase [ubiquinone] flavoprotein 2, mitochondrial                                            | NDUFV2  |
| Cells   | sp    | P19623  | SPEE_HUMAN   | Spermidine synthase                                                                                      | SRM     |
| Cells   | sp    | P19784  | CSK22_HUMAN  | Casein kinase II subunit alpha'                                                                          | CSNK2A2 |
| Cells   | sp    | P20073  | ANXA7_HUMAN  | Annexin A7                                                                                               | ANXA7   |
| Cells   | sp    | P20290  | BTF3_HUMAN   | Transcription factor BTF3                                                                                | BTF3    |
| Cells   | sp    | P20336  | RAB3A_HUMAN  | Ras-related protein Rab-3A                                                                               | RAB3A   |
| Cells   | sp    | P20337  | RAB3B_HUMAN  | Ras-related protein Rab-3B                                                                               | RAB3B   |
| Cells   | sp    | P20338  | RAB4A_HUMAN  | Ras-related protein Rab-4A                                                                               | RAB4A   |
| Cells   | sp    | P20339  | RAB5A_HUMAN  | Ras-related protein Rab-5A                                                                               | RAB5A   |
| Cells   | sp    | P20340  | RAB6A_HUMAN  | Ras-related protein Rab-6A                                                                               | RAB6A   |
| Cells   | sp    | P20618  | PSB1_HUMAN   | Proteasome subunit beta type-1                                                                           | PSMB1   |

Supplementary Table 2.xlsx

| Cluster | class | UNIPROT | UNIPROT_ID  | Description                                                              | GN        |
|---------|-------|---------|-------------|--------------------------------------------------------------------------|-----------|
| Cells   | sp    | P20645  | MPRD_HUMAN  | Cation-dependent mannose-6-phosphate receptor                            | M6PR      |
| Cells   | sp    | P20674  | COX5A_HUMAN | Cytochrome c oxidase subunit 5A, mitochondrial                           | COX5A     |
| Cells   | sp    | P20700  | LMNB1_HUMAN | Lamin-B1                                                                 | LMNB1     |
| Cells   | sp    | P20810  | ICAL_HUMAN  | Calpastatin                                                              | CAST      |
| Cells   | sp    | P20839  | IMDH1_HUMAN | Inosine-5'-monophosphate dehydrogenase 1                                 | IMPDH1    |
| Cells   | sp    | P20962  | PTMS_HUMAN  | Parathyroid hormone-related protein                                      | PTMS      |
| Cells   | sp    | P21108  | PRPS3_HUMAN | Ribose-phosphate pyrophosphokinase 3                                     | PRPS1L1   |
| Cells   | sp    | P21291  | CSRP1_HUMAN | Cysteine and glycine-rich protein 1                                      | CSRP1     |
| Cells   | sp    | P21796  | VDAC1_HUMAN | Voltage-dependent anion-selective channel protein 1                      | VDAC1     |
| Cells   | sp    | P21912  | SDHB_HUMAN  | Succinate dehydrogenase [ubiquinone] iron-sulfur subunit, mitochondrial  | SDHB      |
| Cells   | sp    | P21926  | CD9_HUMAN   | CD9 antigen                                                              | CD9       |
| Cells   | sp    | P21980  | TGM2_HUMAN  | Protein-glutamine gamma-glutamyltransferase 2                            | TGM2      |
| Cells   | sp    | P22061  | PIMT_HUMAN  | Protein-L-isoaspartate(D-aspartate) O-methyltransferase                  | PCMT1     |
| Cells   | sp    | P22234  | PUR6_HUMAN  | Multifunctional protein ADE2                                             | PAICS     |
| Cells   | sp    | P22307  | NLTP_HUMAN  | Non-specific lipid-transfer protein                                      | SCP2      |
| Cells   | sp    | P22492  | H1T_HUMAN   | Histone H1t                                                              | H1-6      |
| Cells   | sp    | P22626  | ROA2_HUMAN  | Heterogeneous nuclear ribonucleoproteins A2/B1                           | HNRNPA2B1 |
| Cells   | sp    | P22695  | QCR2_HUMAN  | Cytochrome b-c1 complex subunit 2, mitochondrial                         | UQCRC2    |
| Cells   | sp    | P23193  | TCEA1_HUMAN | Transcription elongation factor A protein 1                              | TCEA1     |
| Cells   | sp    | P23229  | ITGA6_HUMAN | Integrin alpha-6                                                         | ITGA6     |
| Cells   | sp    | P23246  | SFPQ_HUMAN  | Splicing factor, proline- and glutamine-rich                             | SFPQ      |
| Cells   | sp    | P23284  | PPIB_HUMAN  | Peptidyl-prolyl cis-trans isomerase B                                    | PPIB      |
| Cells   | sp    | P23381  | SYWC_HUMAN  | Tryptophan-tRNA ligase, cytoplasmic                                      | WARS1     |
| Cells   | sp    | P23396  | RS3_HUMAN   | 40S ribosomal protein S3                                                 | RPS3      |
| Cells   | sp    | P23434  | GCSH_HUMAN  | Glycine cleavage system H protein, mitochondrial                         | GCSH      |
| Cells   | sp    | P23588  | IF4B_HUMAN  | Eukaryotic translation initiation factor 4B                              | EIF4B     |
| Cells   | sp    | P23786  | CPT2_HUMAN  | Carnitine O-palmitoyltransferase 2, mitochondrial                        | CPT2      |
| Cells   | sp    | P24534  | EF1B_HUMAN  | Elongation factor 1-beta                                                 | EEF1B2    |
| Cells   | sp    | P24539  | AT5F1_HUMAN | ATP synthase F(0) complex subunit B1, mitochondrial                      | ATP5PB    |
| Cells   | sp    | P24666  | PPAC_HUMAN  | Low molecular weight phosphotyrosine protein phosphatase                 | ACP1      |
| Cells   | sp    | P24752  | THIL_HUMAN  | Acetyl-CoA acetyltransferase, mitochondrial                              | ACAT1     |
| Cells   | sp    | P24844  | MYL9_HUMAN  | Myosin regulatory light polypeptide 9                                    | MYL9      |
| Cells   | sp    | P25325  | THTM_HUMAN  | 3-mercaptopyruvate sulfurtransferase                                     | MPST      |
| Cells   | sp    | P25398  | RS12_HUMAN  | 40S ribosomal protein S12                                                | RPS12     |
| Cells   | sp    | P25685  | DNJB1_HUMAN | DnaJ homolog subfamily B member 1                                        | DNAJB1    |
| Cells   | sp    | P25705  | ATPA_HUMAN  | ATP synthase subunit alpha, mitochondrial                                | ATP5F1A   |
| Cells   | sp    | P25786  | PSA1_HUMAN  | Proteasome subunit alpha type-1                                          | PSMA1     |
| Cells   | sp    | P26006  | ITA3_HUMAN  | Integrin alpha-3                                                         | ITGA3     |
| Cells   | sp    | P26368  | U2AF2_HUMAN | Splicing factor U2AF 65 kDa subunit                                      | U2AF2     |
| Cells   | sp    | P26373  | RL13_HUMAN  | 60S ribosomal protein L13                                                | RPL13     |
| Cells   | sp    | P26440  | IVD_HUMAN   | Isovaleryl-CoA dehydrogenase, mitochondrial                              | IVD       |
| Cells   | sp    | P26583  | HMG2_HUMAN  | High mobility group protein B2                                           | HMG2      |
| Cells   | sp    | P26599  | PTBP1_HUMAN | Polypyrimidine tract-binding protein 1                                   | PTBP1     |
| Cells   | sp    | P26639  | SYTC_HUMAN  | Threonine-tRNA ligase 1, cytoplasmic                                     | TARS1     |
| Cells   | sp    | P26885  | FKBP2_HUMAN | Peptidyl-prolyl cis-trans isomerase FKBP2                                | FKBP2     |
| Cells   | sp    | P27694  | RFA1_HUMAN  | Replication protein A 70 kDa DNA-binding subunit                         | RPA1      |
| Cells   | sp    | P27695  | APEX1_HUMAN | DNA-(apurinic or apyrimidinic site) lyase                                | APEX1     |
| Cells   | sp    | P27797  | CALR_HUMAN  | Calreticulin                                                             | CALR      |
| Cells   | sp    | P27816  | MAP4_HUMAN  | Microtubule-associated protein 4                                         | MAP4      |
| Cells   | sp    | P27824  | CALX_HUMAN  | Calnexin                                                                 | CANX      |
| Cells   | sp    | P28062  | PSB8_HUMAN  | Proteasome subunit beta type-8                                           | PSMB8     |
| Cells   | sp    | P28074  | PSB5_HUMAN  | Proteasome subunit beta type-5                                           | PSMB5     |
| Cells   | sp    | P28331  | NDUS1_HUMAN | NADH-ubiquinone oxidoreductase 75 kDa subunit, mitochondrial             | NDUFS1    |
| Cells   | sp    | P28482  | MK01_HUMAN  | Mitogen-activated protein kinase 1                                       | MAPK1     |
| Cells   | sp    | P28838  | AMPL_HUMAN  | Cytosol aminopeptidase                                                   | LAP3      |
| Cells   | sp    | P29218  | IMPA1_HUMAN | Inositol monophosphatase 1                                               | IMPA1     |
| Cells   | sp    | P29317  | EPHA2_HUMAN | Ephrin type-A receptor 2                                                 | EPHA2     |
| Cells   | sp    | P29692  | EF1D_HUMAN  | Elongation factor 1-delta                                                | EEF1D     |
| Cells   | sp    | P29966  | MARCS_HUMAN | Myristoylated alanine-rich C-kinase substrate                            | MARCKS    |
| Cells   | sp    | P30040  | ERP29_HUMAN | Endoplasmic reticulum resident protein 29                                | ERP29     |
| Cells   | sp    | P30041  | PRDX6_HUMAN | Peroxiredoxin-6                                                          | PRDX6     |
| Cells   | sp    | P30043  | BLVRB_HUMAN | Flavin reductase (NADPH)                                                 | BLVRB     |
| Cells   | sp    | P30044  | PRDX5_HUMAN | Peroxiredoxin-5, mitochondrial                                           | PRDX5     |
| Cells   | sp    | P30046  | DOPD_HUMAN  | D-dopachrome decarboxylase                                               | DDT       |
| Cells   | sp    | P30048  | PRDX3_HUMAN | Thioredoxin-dependent peroxide reductase, mitochondrial                  | PRDX3     |
| Cells   | sp    | P30049  | ATPD_HUMAN  | ATP synthase subunit delta, mitochondrial                                | ATP5F1D   |
| Cells   | sp    | P30050  | RL12_HUMAN  | 60S ribosomal protein L12                                                | RPL12     |
| Cells   | sp    | P30084  | ECHM_HUMAN  | Enoyl-CoA hydratase, mitochondrial                                       | ECHS1     |
| Cells   | sp    | P30085  | KCY_HUMAN   | UMP-CMP kinase                                                           | CMPK1     |
| Cells   | sp    | P30101  | PDIA3_HUMAN | Protein disulfide-isomerase A3                                           | PDIA3     |
| Cells   | sp    | P30405  | PPIF_HUMAN  | Peptidyl-prolyl cis-trans isomerase F, mitochondrial                     | PPIF      |
| Cells   | sp    | P30419  | NMT1_HUMAN  | Glycylpeptide N-tetradecanoyltransferase 1                               | NMT1      |
| Cells   | sp    | P30533  | AMRP_HUMAN  | Alpha-2-macroglobulin receptor-associated protein                        | LRPAP1    |
| Cells   | sp    | P30626  | SORCN_HUMAN | Sorcin                                                                   | SRI       |
| Cells   | sp    | P30740  | ILEU_HUMAN  | Leukocyte elastase inhibitor                                             | SERPINB1  |
| Cells   | sp    | P30825  | SL7A1_HUMAN | High affinity cationic amino acid transporter 1                          | SLC7A1    |
| Cells   | sp    | P30837  | AL1B1_HUMAN | Aldehyde dehydrogenase X, mitochondrial                                  | ALDH1B1   |
| Cells   | sp    | P31040  | SDHA_HUMAN  | Succinate dehydrogenase [ubiquinone] flavoprotein subunit, mitochondrial | SDHA      |
| Cells   | sp    | P31153  | METK2_HUMAN | S-adenosylmethionine synthase isoform type-2                             | MAT2A     |
| Cells   | sp    | P31323  | KAP3_HUMAN  | cAMP-dependent protein kinase type II-beta regulatory subunit            | PRKAR2B   |
| Cells   | sp    | P31483  | TIA1_HUMAN  | Nucleolysin TIA-1 isoform p40                                            | TIA1      |
| Cells   | sp    | P31689  | DNJA1_HUMAN | DnaJ homolog subfamily A member 1                                        | DNAJA1    |
| Cells   | sp    | P31930  | QCR1_HUMAN  | Cytochrome b-c1 complex subunit 1, mitochondrial                         | UQCRC1    |
| Cells   | sp    | P31937  | 3HIDH_HUMAN | 3-hydroxyisobutyrate dehydrogenase, mitochondrial                        | HIBADH    |
| Cells   | sp    | P31939  | PUR9_HUMAN  | Bifunctional purine biosynthesis protein PURH                            | ATIC      |
| Cells   | sp    | P31942  | HNRH3_HUMAN | Heterogeneous nuclear ribonucleoprotein H3                               | HNRNPH3   |
| Cells   | sp    | P31943  | HNRH1_HUMAN | Heterogeneous nuclear ribonucleoprotein H                                | HNRNPH1   |
| Cells   | sp    | P31947  | 1433S_HUMAN | 14-3-3 protein sigma                                                     | SFN       |
| Cells   | sp    | P31948  | STIP1_HUMAN | Stress-induced-phosphoprotein 1                                          | STIP1     |
| Cells   | sp    | P31949  | S10AB_HUMAN | Protein S100-A11                                                         | S100A11   |

Supplementary Table 2.xlsx

| Cluster | class | UNIPROT | UNIPROT_ID   | Description                                                                                                       | GN       |
|---------|-------|---------|--------------|-------------------------------------------------------------------------------------------------------------------|----------|
| Cells   | sp    | P33240  | CSTF2_HUMAN  | Cleavage stimulation factor subunit 2                                                                             | CSTF2    |
| Cells   | sp    | P33316  | DUT_HUMAN    | Deoxyuridine 5'-triphosphate nucleotidohydrolase, mitochondrial                                                   | DUT      |
| Cells   | sp    | P34897  | GLYM_HUMAN   | Serine hydroxymethyltransferase, mitochondrial                                                                    | SHMT2    |
| Cells   | sp    | P34932  | HSP74_HUMAN  | Heat shock 70 kDa protein 4                                                                                       | HSPA4    |
| Cells   | sp    | P35080  | PROF2_HUMAN  | Profilin-2                                                                                                        | PFN2     |
| Cells   | sp    | P35222  | CTNB1_HUMAN  | Catenin beta-1                                                                                                    | CTNNB1   |
| Cells   | sp    | P35232  | PHB_HUMAN    | Prohibitin                                                                                                        | PHB      |
| Cells   | sp    | P35237  | SPB6_HUMAN   | Serpin B6                                                                                                         | SERPINB6 |
| Cells   | sp    | P35244  | RFA3_HUMAN   | Replication protein A 14 kDa subunit                                                                              | RPA3     |
| Cells   | sp    | P35268  | RL22_HUMAN   | 60S ribosomal protein L22                                                                                         | RPL22    |
| Cells   | sp    | P35269  | T2FA_HUMAN   | General transcription factor IIF subunit 1                                                                        | GTF2F1   |
| Cells   | sp    | P35270  | SPRE_HUMAN   | Sepiapterin reductase                                                                                             | SPR      |
| Cells   | sp    | P35606  | COPB2_HUMAN  | Coatomer subunit beta'                                                                                            | COPB2    |
| Cells   | sp    | P35613  | BASI_HUMAN   | Basigin                                                                                                           | BSG      |
| Cells   | sp    | P35637  | FUS_HUMAN    | RNA-binding protein FUS                                                                                           | FUS      |
| Cells   | sp    | P35659  | DEK_HUMAN    | Protein DEK                                                                                                       | DEK      |
| Cells   | sp    | P35914  | HMGCL_HUMAN  | Hydroxymethylglutaryl-CoA lyase, mitochondrial                                                                    | HMGCL    |
| Cells   | sp    | P36405  | ARL3_HUMAN   | ADP-ribosylation factor-like protein 3                                                                            | ARL3     |
| Cells   | sp    | P36578  | RL4_HUMAN    | 60S ribosomal protein L4                                                                                          | RPL4     |
| Cells   | sp    | P36873  | PP1G_HUMAN   | Serine/threonine-protein phosphatase PP1-gamma catalytic subunit                                                  | PPP1CC   |
| Cells   | sp    | P36957  | ODO2_HUMAN   | Dihydropyridyllysine-residue succinyltransferase component of 2-oxoglutarate dehydrogenase complex, mitochondrial | DLST     |
| Cells   | sp    | P37108  | SRP14_HUMAN  | Signal recognition particle 14 kDa protein                                                                        | SRP14    |
| Cells   | sp    | P37837  | TALDO_HUMAN  | Transaldolase                                                                                                     | TALDO1   |
| Cells   | sp    | P38117  | ETFB_HUMAN   | Electron transfer flavoprotein subunit beta                                                                       | ETFB     |
| Cells   | sp    | P38159  | RBMX_HUMAN   | RNA-binding motif protein, X chromosome                                                                           | RBMX     |
| Cells   | sp    | P38405  | GNAL_HUMAN   | Guanine nucleotide-binding protein G(olf) subunit alpha                                                           | GNAL     |
| Cells   | sp    | P38646  | GRP75_HUMAN  | Stress-70 protein, mitochondrial                                                                                  | HSPA9    |
| Cells   | sp    | P38919  | IF4A3_HUMAN  | Eukaryotic initiation factor 4A-III                                                                               | EIF4A3   |
| Cells   | sp    | P39019  | RS19_HUMAN   | 40S ribosomal protein S19                                                                                         | RPS19    |
| Cells   | sp    | P39023  | RL3_HUMAN    | 60S ribosomal protein L3                                                                                          | RPL3     |
| Cells   | sp    | P39656  | OST48_HUMAN  | Dolichyl-diphosphooligosaccharide-protein glycosyltransferase 48 kDa subunit                                      | DDOST    |
| Cells   | sp    | P39687  | ANP32A_HUMAN | Acidic leucine-rich nuclear phosphoprotein 32 family member A                                                     | ANP32A   |
| Cells   | sp    | P40121  | CAPG_HUMAN   | Macrophage-capping protein                                                                                        | CAPG     |
| Cells   | sp    | P40429  | RL13A_HUMAN  | 60S ribosomal protein L13a                                                                                        | RPL13A   |
| Cells   | sp    | P40855  | PEX19_HUMAN  | Peroxisomal biogenesis factor 19                                                                                  | PEX19    |
| Cells   | sp    | P40925  | MDHC_HUMAN   | Malate dehydrogenase, cytoplasmic                                                                                 | MDH1     |
| Cells   | sp    | P40926  | MDHM_HUMAN   | Malate dehydrogenase, mitochondrial                                                                               | MDH2     |
| Cells   | sp    | P40939  | ECHA_HUMAN   | Trifunctional enzyme subunit alpha, mitochondrial                                                                 | HADHA    |
| Cells   | sp    | P41223  | BUD31_HUMAN  | Protein BUD31 homolog                                                                                             | BUD31    |
| Cells   | sp    | P41236  | IPP2_HUMAN   | Protein phosphatase inhibitor 2                                                                                   | PPP1R2   |
| Cells   | sp    | P41567  | EIF1_HUMAN   | Eukaryotic translation initiation factor 1                                                                        | EIF1     |
| Cells   | sp    | P42126  | EC1_HUMAN    | Enoyl-CoA delta isomerase 1, mitochondrial                                                                        | EC1      |
| Cells   | sp    | P42166  | LAP2A_HUMAN  | Lamina-associated polypeptide 2, isoform alpha                                                                    | TMPO     |
| Cells   | sp    | P42766  | RL35_HUMAN   | 60S ribosomal protein L35                                                                                         | RPL35    |
| Cells   | sp    | P42785  | PCP_HUMAN    | Lysosomal Pro-X carboxypeptidase                                                                                  | PRCP     |
| Cells   | sp    | P42892  | ECE1_HUMAN   | Endothelin-converting enzyme 1                                                                                    | ECE1     |
| Cells   | sp    | P43034  | LIS1_HUMAN   | Platelet-activating factor acetylhydrolase IB subunit alpha                                                       | PAFAH1B1 |
| Cells   | sp    | P43243  | MATR3_HUMAN  | Matrin-3                                                                                                          | MATR3    |
| Cells   | sp    | P43307  | SSRA_HUMAN   | Translocon-associated protein subunit alpha                                                                       | SSR1     |
| Cells   | sp    | P43487  | RANG_HUMAN   | Ran-specific GTPase-activating protein                                                                            | RANBP1   |
| Cells   | sp    | P43686  | PRS6B_HUMAN  | 26S proteasome regulatory subunit 6B                                                                              | PSMC4    |
| Cells   | sp    | P45973  | CBX5_HUMAN   | Chromobox protein homolog 5                                                                                       | CBX5     |
| Cells   | sp    | P45974  | UBP5_HUMAN   | Ubiquitin carboxyl-terminal hydrolase 5                                                                           | USP5     |
| Cells   | sp    | P46063  | RECQ1_HUMAN  | ATP-dependent DNA helicase Q1                                                                                     | RECQL    |
| Cells   | sp    | P46087  | NOP2_HUMAN   | Probable 28S rRNA (cytosine(4447)-C(5))-methyltransferase                                                         | NOP2     |
| Cells   | sp    | P46108  | CRK_HUMAN    | Adapter molecule crk                                                                                              | CRK      |
| Cells   | sp    | P46109  | CRKL_HUMAN   | Crk-like protein                                                                                                  | CRKL     |
| Cells   | sp    | P46379  | BAG6_HUMAN   | Large proline-rich protein BAG6                                                                                   | BAG6     |
| Cells   | sp    | P46777  | RL5_HUMAN    | 60S ribosomal protein L5                                                                                          | RPL5     |
| Cells   | sp    | P46778  | RL21_HUMAN   | 60S ribosomal protein L21                                                                                         | RPL21    |
| Cells   | sp    | P46781  | RS9_HUMAN    | 40S ribosomal protein S9                                                                                          | RPS9     |
| Cells   | sp    | P46782  | RS5_HUMAN    | 40S ribosomal protein S5                                                                                          | RPS5     |
| Cells   | sp    | P46783  | RS10_HUMAN   | 40S ribosomal protein S10                                                                                         | RPS10    |
| Cells   | sp    | P46926  | GNP11_HUMAN  | Glucosamine-6-phosphate isomerase 1                                                                               | GNPDA1   |
| Cells   | sp    | P46937  | YAP1_HUMAN   | Transcriptional coactivator YAP1                                                                                  | YAP1     |
| Cells   | sp    | P46976  | GLYG_HUMAN   | Glycogenin-1                                                                                                      | GYG1     |
| Cells   | sp    | P47755  | CAZA2_HUMAN  | F-actin-capping protein subunit alpha-2                                                                           | CAPZA2   |
| Cells   | sp    | P47756  | CAPZB_HUMAN  | F-actin-capping protein subunit beta                                                                              | CAPZB    |
| Cells   | sp    | P47813  | IF1AX_HUMAN  | Eukaryotic translation initiation factor 1A, X-chromosomal                                                        | EIF1AX   |
| Cells   | sp    | P47895  | AL1A3_HUMAN  | Aldehyde dehydrogenase family 1 member A3                                                                         | ALDH1A3  |
| Cells   | sp    | P47914  | RL29_HUMAN   | 60S ribosomal protein L29                                                                                         | RPL29    |
| Cells   | sp    | P47985  | UCRI_HUMAN   | Cytochrome b-c1 complex subunit Rieske, mitochondrial                                                             | UQCRCF51 |
| Cells   | sp    | P48047  | ATPO_HUMAN   | ATP synthase subunit O, mitochondrial                                                                             | ATP5PO   |
| Cells   | sp    | P48147  | PPCE_HUMAN   | Prolyl endopeptidase                                                                                              | PREP     |
| Cells   | sp    | P48444  | COPD_HUMAN   | Coatomer subunit delta                                                                                            | ARCN1    |
| Cells   | sp    | P48556  | PSMD8_HUMAN  | 26S proteasome non-ATPase regulatory subunit 8                                                                    | PSMD8    |
| Cells   | sp    | P48637  | GSHB_HUMAN   | Glutathione synthetase                                                                                            | GSS      |
| Cells   | sp    | P48643  | TCPE_HUMAN   | T-complex protein 1 subunit epsilon                                                                               | CCT5     |
| Cells   | sp    | P48735  | IDHP_HUMAN   | Isocitrate dehydrogenase [NADP], mitochondrial                                                                    | IDH2     |
| Cells   | sp    | P48739  | PIPNB_HUMAN  | Phosphatidylinositol transfer protein beta isoform                                                                | PIPTNB   |
| Cells   | sp    | P49006  | MRP_HUMAN    | MARCKS-related protein                                                                                            | MARCKSL1 |
| Cells   | sp    | P49023  | PAXI_HUMAN   | Paxillin                                                                                                          | PXN      |
| Cells   | sp    | P49189  | AL9A1_HUMAN  | 4-trimethylaminobutyraldehyde dehydrogenase                                                                       | ALDH9A1  |
| Cells   | sp    | P49321  | NASP_HUMAN   | Nuclear autoantigenic sperm protein                                                                               | NASP     |
| Cells   | sp    | P49366  | DHYS_HUMAN   | Deoxyhypusine synthase                                                                                            | DHPS     |
| Cells   | sp    | P49406  | RM19_HUMAN   | 39S ribosomal protein L19, mitochondrial                                                                          | MRPL19   |
| Cells   | sp    | P49411  | EFTU_HUMAN   | Elongation factor Tu, mitochondrial                                                                               | TUFM     |
| Cells   | sp    | P49419  | AL7A1_HUMAN  | Alpha-amino adipic semialdehyde dehydrogenase                                                                     | ALDH7A1  |
| Cells   | sp    | P49448  | DHE4_HUMAN   | Glutamate dehydrogenase 2, mitochondrial                                                                          | GLUD2    |
| Cells   | sp    | P49458  | SRP9_HUMAN   | Signal recognition particle 9 kDa protein                                                                         | SRP9     |

Supplementary Table 2.xlsx

| Cluster | class | UNIPROT | UNIPROT_ID  | Description                                                     | GN       |
|---------|-------|---------|-------------|-----------------------------------------------------------------|----------|
| Cells   | sp    | P49588  | SYAC_HUMAN  | Alanine-tRNA ligase, cytoplasmic                                | AARS1    |
| Cells   | sp    | P49589  | SYCC_HUMAN  | Cysteine-tRNA ligase, cytoplasmic                               | CARS1    |
| Cells   | sp    | P49591  | SYSC_HUMAN  | Serine-tRNA ligase, cytoplasmic                                 | SARS1    |
| Cells   | sp    | P49720  | PSB3_HUMAN  | Proteasome subunit beta type-3                                  | PSMB3    |
| Cells   | sp    | P49721  | PSB2_HUMAN  | Proteasome subunit beta type-2                                  | PSMB2    |
| Cells   | sp    | P49755  | TMEDA_HUMAN | Transmembrane emp24 domain-containing protein 10                | TMED10   |
| Cells   | sp    | P49773  | HINT1_HUMAN | Histidine triad nucleotide-binding protein 1                    | HINT1    |
| Cells   | sp    | P49821  | NDUV1_HUMAN | NADH dehydrogenase [ubiquinone] flavoprotein 1, mitochondrial   | NDUFV1   |
| Cells   | sp    | P49903  | SPS1_HUMAN  | Selenide, water dikinase 1                                      | SEPHS1   |
| Cells   | sp    | P49914  | MTHFS_HUMAN | 5-formyltetrahydrofolate cyclo-ligase                           | MTHFS    |
| Cells   | sp    | P49959  | MRE11_HUMAN | Double-strand break repair protein MRE11                        | MRE11    |
| Cells   | sp    | P50213  | IDH3A_HUMAN | Isocitrate dehydrogenase [NAD] subunit alpha, mitochondrial     | IDH3A    |
| Cells   | sp    | P50402  | EMD_HUMAN   | Emerin                                                          | EMD      |
| Cells   | sp    | P50452  | SPB8_HUMAN  | Serpin B8                                                       | SERPINB8 |
| Cells   | sp    | P50454  | SERPH_HUMAN | Serpin H1                                                       | SERPINH1 |
| Cells   | sp    | P50502  | F10A1_HUMAN | Hsc70-interacting protein                                       | ST13     |
| Cells   | sp    | P50552  | VASP_HUMAN  | Vasodilator-stimulated phosphoprotein                           | VASP     |
| Cells   | sp    | P50895  | BCAM_HUMAN  | Basal cell adhesion molecule                                    | BCAM     |
| Cells   | sp    | P50897  | PPT1_HUMAN  | Palmitoyl-protein thioesterase 1                                | PPT1     |
| Cells   | sp    | P50914  | RL14_HUMAN  | 60S ribosomal protein L14                                       | RPL14    |
| Cells   | sp    | P50990  | TCPO_HUMAN  | T-complex protein 1 subunit theta                               | CCT8     |
| Cells   | sp    | P50993  | AT1A2_HUMAN | Sodium/potassium-transporting ATPase subunit alpha-2            | ATP1A2   |
| Cells   | sp    | P50995  | ANX11_HUMAN | Annexin A11                                                     | ANXA11   |
| Cells   | sp    | P51148  | RAB5C_HUMAN | Ras-related protein Rab-5C                                      | RAB5C    |
| Cells   | sp    | P51149  | RAB7A_HUMAN | Ras-related protein Rab-7a                                      | RAB7A    |
| Cells   | sp    | P51153  | RAB13_HUMAN | Ras-related protein Rab-13                                      | RAB13    |
| Cells   | sp    | P51398  | RT29_HUMAN  | 28S ribosomal protein S29, mitochondrial                        | DAP3     |
| Cells   | sp    | P51571  | SSRD_HUMAN  | Translocon-associated protein subunit delta                     | SSR4     |
| Cells   | sp    | P51572  | BAP31_HUMAN | B-cell receptor-associated protein 31                           | BCAP31   |
| Cells   | sp    | P51648  | AL3A2_HUMAN | Aldehyde dehydrogenase family 3 member A2                       | ALDH3A2  |
| Cells   | sp    | P51659  | DHB4_HUMAN  | Peroxisomal multifunctional enzyme type 2                       | HSD17B4  |
| Cells   | sp    | P51665  | PSMD7_HUMAN | 26S proteasome non-ATPase regulatory subunit 7                  | PSMD7    |
| Cells   | sp    | P51858  | HDFG_HUMAN  | Hepatoma-derived growth factor                                  | HDFG     |
| Cells   | sp    | P51970  | NDUA8_HUMAN | NADH dehydrogenase [ubiquinone] 1 alpha subcomplex subunit 8    | NDUFA8   |
| Cells   | sp    | P51991  | ROA3_HUMAN  | Heterogeneous nuclear ribonucleoprotein A3                      | HNRNPA3  |
| Cells   | sp    | P52272  | HNRPM_HUMAN | Heterogeneous nuclear ribonucleoprotein M                       | HNRNPM   |
| Cells   | sp    | P52434  | RPAB3_HUMAN | DNA-directed RNA polymerases I, II, and III subunit RPABC3      | POLR2H   |
| Cells   | sp    | P52565  | GDIR1_HUMAN | Rho GDP-dissociation inhibitor 1                                | ARHGDI1A |
| Cells   | sp    | P52597  | HNRPF_HUMAN | Heterogeneous nuclear ribonucleoprotein F                       | HNRNPF   |
| Cells   | sp    | P52758  | RIDA_HUMAN  | 2-iminobutanoate/2-iminopropanoate deaminase                    | RIDA     |
| Cells   | sp    | P52788  | SPSY_HUMAN  | Spermine synthase                                               | SMS      |
| Cells   | sp    | P52815  | RM12_HUMAN  | 39S ribosomal protein L12, mitochondrial                        | MRP12    |
| Cells   | sp    | P52907  | CAZA1_HUMAN | F-actin-capping protein subunit alpha-1                         | CAPZA1   |
| Cells   | sp    | P52926  | HMG2_HUMAN  | High mobility group protein HMGI-C                              | HMG2     |
| Cells   | sp    | P53367  | ARFP1_HUMAN | Arfaptin-1                                                      | ARFP1    |
| Cells   | sp    | P53582  | MAP11_HUMAN | Methionine aminopeptidase 1                                     | METAP1   |
| Cells   | sp    | P53634  | CATC_HUMAN  | Dipeptidyl peptidase 1                                          | CTSC     |
| Cells   | sp    | P53999  | TCP4_HUMAN  | Activated RNA polymerase II transcriptional coactivator p15     | SUB1     |
| Cells   | sp    | P54105  | ICLN_HUMAN  | Methylosome subunit pICln                                       | CLNS1A   |
| Cells   | sp    | P54577  | SYYC_HUMAN  | Tyrosine-tRNA ligase, cytoplasmic                               | YARS1    |
| Cells   | sp    | P54578  | UBP14_HUMAN | Ubiquitin carboxyl-terminal hydrolase 14                        | USP14    |
| Cells   | sp    | P54709  | AT1B3_HUMAN | Sodium/potassium-transporting ATPase subunit beta-3             | ATP1B3   |
| Cells   | sp    | P54725  | RD23A_HUMAN | UV excision repair protein RAD23 homolog A                      | RAD23A   |
| Cells   | sp    | P54727  | RD23B_HUMAN | UV excision repair protein RAD23 homolog B                      | RAD23B   |
| Cells   | sp    | P54819  | KAD2_HUMAN  | Adenylate kinase 2, mitochondrial                               | AK2      |
| Cells   | sp    | P55010  | IFS_HUMAN   | Eukaryotic translation initiation factor 5                      | EIF5     |
| Cells   | sp    | P55036  | PSMD4_HUMAN | 26S proteasome non-ATPase regulatory subunit 4                  | PSMD4    |
| Cells   | sp    | P55084  | ECHB_HUMAN  | Trifunctional enzyme subunit beta, mitochondrial                | HADHB    |
| Cells   | sp    | P55145  | MANF_HUMAN  | Mesencephalic astrocyte-derived neurotrophic factor             | MANF     |
| Cells   | sp    | P55263  | ADK_HUMAN   | Adenosine kinase                                                | ADK      |
| Cells   | sp    | P55327  | TPD52_HUMAN | Tumor protein D52                                               | TPD52    |
| Cells   | sp    | P55769  | NH2L1_HUMAN | NHP2-like protein 1                                             | SNU13    |
| Cells   | sp    | P55795  | HNRH2_HUMAN | Heterogeneous nuclear ribonucleoprotein H2                      | HNRNPH2  |
| Cells   | sp    | P55809  | SCOT1_HUMAN | Succinyl-CoA:3-ketoacid coenzyme A transferase 1, mitochondrial | OXCT1    |
| Cells   | sp    | P55854  | SUMO3_HUMAN | Small ubiquitin-related modifier 3                              | SUMO3    |
| Cells   | sp    | P56134  | ATPK_HUMAN  | ATP synthase subunit f, mitochondrial                           | ATPSMF   |
| Cells   | sp    | P56211  | ARP19_HUMAN | cAMP-regulated phosphoprotein 19                                | ARPP19   |
| Cells   | sp    | P56381  | ATP5E_HUMAN | ATP synthase subunit epsilon, mitochondrial                     | ATP5F1E  |
| Cells   | sp    | P56385  | ATP5I_HUMAN | ATP synthase subunit i, mitochondrial                           | ATP5ME   |
| Cells   | sp    | P56537  | IF6_HUMAN   | Eukaryotic translation initiation factor 6                      | EIF6     |
| Cells   | sp    | P56545  | CTBP2_HUMAN | C-terminal-binding protein 2                                    | CTBP2    |
| Cells   | sp    | P57721  | PCBP3_HUMAN | Poly(rC)-binding protein 3                                      | PCBP3    |
| Cells   | sp    | P58546  | MTPN_HUMAN  | Myotrophin                                                      | MTPN     |
| Cells   | sp    | P59190  | RAB15_HUMAN | Ras-related protein Rab-15                                      | RAB15    |
| Cells   | sp    | P59998  | ARPC4_HUMAN | Actin-related protein 2/3 complex subunit 4                     | ARPC4    |
| Cells   | sp    | P60660  | MYL6_HUMAN  | Myosin light polypeptide 6                                      | MYL6     |
| Cells   | sp    | P60763  | RAC3_HUMAN  | Ras-related C3 botulinum toxin substrate 3                      | RAC3     |
| Cells   | sp    | P60866  | RS20_HUMAN  | 40S ribosomal protein S20                                       | RPS20    |
| Cells   | sp    | P60891  | PRPS1_HUMAN | Ribose-phosphate pyrophosphokinase 1                            | PRPS1    |
| Cells   | sp    | P60903  | S10AA_HUMAN | Protein S100-A10                                                | S100A10  |
| Cells   | sp    | P60953  | CDC42_HUMAN | Cell division control protein 42 homolog                        | CDC42    |
| Cells   | sp    | P61006  | RAB8A_HUMAN | Ras-related protein Rab-8A                                      | RAB8A    |
| Cells   | sp    | P61011  | SRP54_HUMAN | Signal recognition particle 54 kDa protein                      | SRP54    |
| Cells   | sp    | P61018  | RAB4B_HUMAN | Ras-related protein Rab-4B                                      | RAB4B    |
| Cells   | sp    | P61019  | RAB2A_HUMAN | Ras-related protein Rab-2A                                      | RAB2A    |
| Cells   | sp    | P61020  | RAB5B_HUMAN | Ras-related protein Rab-5B                                      | RAB5B    |
| Cells   | sp    | P61026  | RAB10_HUMAN | Ras-related protein Rab-10                                      | RAB10    |
| Cells   | sp    | P61086  | UBE2K_HUMAN | Ubiquitin-conjugating enzyme E2 K                               | UBE2K    |
| Cells   | sp    | P61088  | UBE2N_HUMAN | Ubiquitin-conjugating enzyme E2 N                               | UBE2N    |
| Cells   | sp    | P61106  | RAB14_HUMAN | Ras-related protein Rab-14                                      | RAB14    |

Supplementary Table 2.xlsx

| Cluster | class | UNIPROT | UNIPROT_ID   | Description                                                                | GN       |
|---------|-------|---------|--------------|----------------------------------------------------------------------------|----------|
| Cells   | sp    | P61158  | ARP3_HUMAN   | Actin-related protein 3                                                    | ACTR3    |
| Cells   | sp    | P61160  | ARP2_HUMAN   | Actin-related protein 2                                                    | ACTR2    |
| Cells   | sp    | P61163  | ACTZ_HUMAN   | Alpha-centractin                                                           | ACTR1A   |
| Cells   | sp    | P61204  | ARF3_HUMAN   | ADP-ribosylation factor 3                                                  | ARF3     |
| Cells   | sp    | P61225  | RAP2B_HUMAN  | Ras-related protein Rap-2b                                                 | RAP2B    |
| Cells   | sp    | P61247  | RS3A_HUMAN   | 40S ribosomal protein S3a                                                  | RPS3A    |
| Cells   | sp    | P61254  | RL26_HUMAN   | 60S ribosomal protein L26                                                  | RPL26    |
| Cells   | sp    | P61289  | PSME3_HUMAN  | Proteasome activator complex subunit 3                                     | PSME3    |
| Cells   | sp    | P61313  | RL15_HUMAN   | 60S ribosomal protein L15                                                  | RPL15    |
| Cells   | sp    | P61326  | MGN_HUMAN    | Protein mago nashi homolog                                                 | MAGOH    |
| Cells   | sp    | P61353  | RL27_HUMAN   | 60S ribosomal protein L27                                                  | RPL27    |
| Cells   | sp    | P61586  | RHOA_HUMAN   | Transforming protein RhoA                                                  | RHOA     |
| Cells   | sp    | P61604  | CH10_HUMAN   | 10 kDa heat shock protein, mitochondrial                                   | HSPE1    |
| Cells   | sp    | P61758  | PF3D3_HUMAN  | Prefoldin subunit 3                                                        | VBP1     |
| Cells   | sp    | P61803  | DAD1_HUMAN   | Dolichyl-diphosphooligosaccharide-protein glycosyltransferase subunit DAD1 | DAD1     |
| Cells   | sp    | P61923  | COP21_HUMAN  | Coatomer subunit zeta-1                                                    | COP21    |
| Cells   | sp    | P61956  | SUMO2_HUMAN  | Small ubiquitin-related modifier 2                                         | SUMO2    |
| Cells   | sp    | P61960  | UFM1_HUMAN   | Ubiquitin-fold modifier 1                                                  | UFM1     |
| Cells   | sp    | P61964  | WDR5_HUMAN   | WD repeat-containing protein 5                                             | WDR5     |
| Cells   | sp    | P61970  | NTF2_HUMAN   | Nuclear transport factor 2                                                 | NTF2     |
| Cells   | sp    | P61978  | HNRPK_HUMAN  | Heterogeneous nuclear ribonucleoprotein K                                  | HNRNPK   |
| Cells   | sp    | P62081  | RS7_HUMAN    | 40S ribosomal protein S7                                                   | RPS7     |
| Cells   | sp    | P62136  | PP1A_HUMAN   | Serine/threonine-protein phosphatase PP1-alpha catalytic subunit           | PPP1CA   |
| Cells   | sp    | P62140  | PP1B_HUMAN   | Serine/threonine-protein phosphatase PP1-beta catalytic subunit            | PPP1CB   |
| Cells   | sp    | P62191  | PR54_HUMAN   | 26S proteasome regulatory subunit 4                                        | PSMC1    |
| Cells   | sp    | P62249  | RS16_HUMAN   | 40S ribosomal protein S16                                                  | RPS16    |
| Cells   | sp    | P62263  | RS14_HUMAN   | 40S ribosomal protein S14                                                  | RPS14    |
| Cells   | sp    | P62269  | RS18_HUMAN   | 40S ribosomal protein S18                                                  | RPS18    |
| Cells   | sp    | P62273  | RS29_HUMAN   | 40S ribosomal protein S29                                                  | RPS29    |
| Cells   | sp    | P62277  | RS13_HUMAN   | 40S ribosomal protein S13                                                  | RPS13    |
| Cells   | sp    | P62304  | RUXE_HUMAN   | Small nuclear ribonucleoprotein E                                          | SNRPE    |
| Cells   | sp    | P62306  | RUXF_HUMAN   | Small nuclear ribonucleoprotein F                                          | SNRPF    |
| Cells   | sp    | P62308  | RUXG_HUMAN   | Small nuclear ribonucleoprotein G                                          | SNRPG    |
| Cells   | sp    | P62310  | LSM3_HUMAN   | U6 snRNA-associated Sm-like protein LSm3                                   | LSM3     |
| Cells   | sp    | P62312  | LSM6_HUMAN   | U6 snRNA-associated Sm-like protein LSm6                                   | LSM6     |
| Cells   | sp    | P62314  | SMD1_HUMAN   | Small nuclear ribonucleoprotein Sm D1                                      | SNRPD1   |
| Cells   | sp    | P62316  | SMD2_HUMAN   | Small nuclear ribonucleoprotein Sm D2                                      | SNRPD2   |
| Cells   | sp    | P62318  | SMD3_HUMAN   | Small nuclear ribonucleoprotein Sm D3                                      | SNRPD3   |
| Cells   | sp    | P62328  | TYB4_HUMAN   | Thymosin beta-4                                                            | TMSB4X   |
| Cells   | sp    | P62424  | RL7A_HUMAN   | 60S ribosomal protein L7a                                                  | RPL7A    |
| Cells   | sp    | P62491  | RB11A_HUMAN  | Ras-related protein Rab-11A                                                | RAB11A   |
| Cells   | sp    | P62714  | PP2AB_HUMAN  | Serine/threonine-protein phosphatase 2A catalytic subunit beta isoform     | PPP2CB   |
| Cells   | sp    | P62750  | RL23A_HUMAN  | 60S ribosomal protein L23a                                                 | RPL23A   |
| Cells   | sp    | P62820  | RAB1A_HUMAN  | Ras-related protein Rab-1A                                                 | RAB1A    |
| Cells   | sp    | P62829  | RL23_HUMAN   | 60S ribosomal protein L23                                                  | RPL23    |
| Cells   | sp    | P62841  | RS15_HUMAN   | 40S ribosomal protein S15                                                  | RPS15    |
| Cells   | sp    | P62847  | RS24_HUMAN   | 40S ribosomal protein S24                                                  | RPS24    |
| Cells   | sp    | P62851  | RS25_HUMAN   | 40S ribosomal protein S25                                                  | RPS25    |
| Cells   | sp    | P62857  | RS28_HUMAN   | 40S ribosomal protein S28                                                  | RPS28    |
| Cells   | sp    | P62873  | GNB1_HUMAN   | Guanine nucleotide-binding protein G(I)/G(S)/G(T) subunit beta-1           | GNB1     |
| Cells   | sp    | P62879  | GNB2_HUMAN   | Guanine nucleotide-binding protein G(I)/G(S)/G(T) subunit beta-2           | GNB2     |
| Cells   | sp    | P62888  | RL30_HUMAN   | 60S ribosomal protein L30                                                  | RPL30    |
| Cells   | sp    | P62906  | RL10A_HUMAN  | 60S ribosomal protein L10a                                                 | RPL10A   |
| Cells   | sp    | P62910  | RL32_HUMAN   | 60S ribosomal protein L32                                                  | RPL32    |
| Cells   | sp    | P62913  | RL11_HUMAN   | 60S ribosomal protein L11                                                  | RPL11    |
| Cells   | sp    | P62917  | RL8_HUMAN    | 60S ribosomal protein L8                                                   | RPL8     |
| Cells   | sp    | P62942  | FKBP1A_HUMAN | Peptidyl-prolyl cis-trans isomerase FKBP1A                                 | FKBP1A   |
| Cells   | sp    | P62993  | GRB2_HUMAN   | Growth factor receptor-bound protein 2                                     | GRB2     |
| Cells   | sp    | P62995  | TRA2B_HUMAN  | Transformer-2 protein homolog beta                                         | TRA2B    |
| Cells   | sp    | P63000  | RAC1_HUMAN   | Ras-related C3 botulinum toxin substrate 1                                 | RAC1     |
| Cells   | sp    | P63027  | VAMP2_HUMAN  | Vesicle-associated membrane protein 2                                      | VAMP2    |
| Cells   | sp    | P63096  | GNAI1_HUMAN  | Guanine nucleotide-binding protein G(i) subunit alpha-1                    | GNAI1    |
| Cells   | sp    | P63162  | RSMN_HUMAN   | Small nuclear ribonucleoprotein-associated protein N                       | SNRPN    |
| Cells   | sp    | P63165  | SUMO1_HUMAN  | Small ubiquitin-related modifier 1                                         | SUMO1    |
| Cells   | sp    | P63172  | DYLT1_HUMAN  | Dynein light chain Tctex-type1                                             | DYNLT1   |
| Cells   | sp    | P63173  | RL38_HUMAN   | 60S ribosomal protein L38                                                  | RPL38    |
| Cells   | sp    | P63208  | SKP1_HUMAN   | S-phase kinase-associated protein 1                                        | SKP1     |
| Cells   | sp    | P63220  | RS21_HUMAN   | 40S ribosomal protein S21                                                  | RPS21    |
| Cells   | sp    | P63241  | IF5A1_HUMAN  | Eukaryotic translation initiation factor 5A-1                              | EIF5A    |
| Cells   | sp    | P63244  | RACK1_HUMAN  | Receptor of activated protein C kinase 1                                   | RACK1    |
| Cells   | sp    | P63279  | UBC9_HUMAN   | SUMO-conjugating enzyme UBC9                                               | UBE2I    |
| Cells   | sp    | P67775  | PP2AA_HUMAN  | Serine/threonine-protein phosphatase 2A catalytic subunit alpha isoform    | PPP2CA   |
| Cells   | sp    | P67809  | YBOX1_HUMAN  | Y-box-binding protein 1                                                    | YBX1     |
| Cells   | sp    | P67870  | CSK2B_HUMAN  | Casein kinase II subunit beta                                              | CSNK2B   |
| Cells   | sp    | P67936  | TPM4_HUMAN   | Tropomyosin alpha-4 chain                                                  | TPM4     |
| Cells   | sp    | P68036  | UBE2L3_HUMAN | Ubiquitin-conjugating enzyme E2 L3                                         | UBE2L3   |
| Cells   | sp    | P68400  | CSK21_HUMAN  | Casein kinase II subunit alpha                                             | CSNK2A1  |
| Cells   | sp    | P68402  | PA1B2_HUMAN  | Platelet-activating factor acetylhydrolase IB subunit beta                 | PAFAH1B2 |
| Cells   | sp    | P68431  | H31_HUMAN    | Histone H3.1                                                               | H3C4     |
| Cells   | sp    | P69849  | NOMO3_HUMAN  | Nodal modulator 3                                                          | NOMO3    |
| Cells   | sp    | P78318  | IGBP1_HUMAN  | Immunoglobulin-binding protein 1                                           | IGBP1    |
| Cells   | sp    | P78330  | SERB_HUMAN   | Phosphoserine phosphatase                                                  | PSPH     |
| Cells   | sp    | P78406  | RAE1L_HUMAN  | mRNA export factor                                                         | RAE1     |
| Cells   | sp    | P78417  | GSTO1_HUMAN  | Glutathione S-transferase omega-1                                          | GSTO1    |
| Cells   | sp    | P80303  | NUCB2_HUMAN  | Nucleobindin-2                                                             | NUCB2    |
| Cells   | sp    | P80723  | BASP1_HUMAN  | Brain acid soluble protein 1                                               | BASP1    |
| Cells   | sp    | P82650  | RT22_HUMAN   | 28S ribosomal protein S22, mitochondrial                                   | MRPS22   |
| Cells   | sp    | P82909  | RT36_HUMAN   | 28S ribosomal protein S36, mitochondrial                                   | MRPS36   |
| Cells   | sp    | P82979  | SARNP_HUMAN  | SAP domain-containing ribonucleoprotein                                    | SARNP    |
| Cells   | sp    | P83916  | CBX1_HUMAN   | Chromobox protein homolog 1                                                | CBX1     |



Supplementary Table 2.xlsx

| Cluster | class | UNIPROT | UNIPROT_ID    | Description                                                                 | GN      |
|---------|-------|---------|---------------|-----------------------------------------------------------------------------|---------|
| Cells   | sp    | P84077  | ARF1_HUMAN    | ADP-ribosylation factor 1                                                   | ARF1    |
| Cells   | sp    | P84085  | ARF5_HUMAN    | ADP-ribosylation factor 5                                                   | ARF5    |
| Cells   | sp    | P84090  | ERH_HUMAN     | Enhancer of rudimentary homolog                                             | ERH     |
| Cells   | sp    | P84103  | SRSF3_HUMAN   | Serine/arginine-rich splicing factor 3                                      | SRSF3   |
| Cells   | sp    | P84243  | H33_HUMAN     | Histone H3.3                                                                | H3-3B   |
| Cells   | sp    | P98175  | RBM10_HUMAN   | RNA-binding protein 10                                                      | RBM10   |
| Cells   | sp    | P98179  | RBM3_HUMAN    | RNA-binding protein 3                                                       | RBM3    |
| Cells   | sp    | P99999  | CYC_HUMAN     | Cytochrome c                                                                | CYC5    |
| Cells   | sp    | Q00059  | TFAM_HUMAN    | Transcription factor A, mitochondrial                                       | TFAM    |
| Cells   | sp    | Q00169  | PIPNA_HUMAN   | Phosphatidylinositol transfer protein alpha isoform                         | PIPNA   |
| Cells   | sp    | Q00688  | FKBP3_HUMAN   | Peptidyl-prolyl cis-trans isomerase FKBP3                                   | FKBP3   |
| Cells   | sp    | Q00765  | REEP5_HUMAN   | Receptor expression-enhancing protein 5                                     | REEP5   |
| Cells   | sp    | Q00796  | DHSO_HUMAN    | Sorbitol dehydrogenase                                                      | SORD    |
| Cells   | sp    | Q00839  | HNRNP_U       | Heterogeneous nuclear ribonucleoprotein U                                   | HNRNP_U |
| Cells   | sp    | Q01081  | U2AF1_HUMAN   | Splicing factor U2AF 35 kDa subunit                                         | U2AF1   |
| Cells   | sp    | Q01082  | SPTB2_HUMAN   | Spectrin beta chain, non-erythrocytic 1                                     | SPTBN1  |
| Cells   | sp    | Q01085  | TIAR_HUMAN    | Nucleolysin TIAR                                                            | TIAL1   |
| Cells   | sp    | Q01105  | SET_HUMAN     | Protein SET                                                                 | SET     |
| Cells   | sp    | Q01130  | SRSF2_HUMAN   | Serine/arginine-rich splicing factor 2                                      | SRSF2   |
| Cells   | sp    | Q01469  | FABP5_HUMAN   | Fatty acid-binding protein 5                                                | FABP5   |
| Cells   | sp    | Q01628  | IFM3_HUMAN    | Interferon-induced transmembrane protein 3                                  | IFITM3  |
| Cells   | sp    | Q01629  | IFM2_HUMAN    | Interferon-induced transmembrane protein 2                                  | IFITM2  |
| Cells   | sp    | Q01650  | LAT1_HUMAN    | Large neutral amino acids transporter small subunit 1                       | SLC7A5  |
| Cells   | sp    | Q01658  | NC2B_HUMAN    | Protein Dr1                                                                 | DR1     |
| Cells   | sp    | Q01813  | PFKP_HUMAN    | ATP-dependent 6-phosphofructokinase, platelet type                          | PFKP    |
| Cells   | sp    | Q01844  | EWS_HUMAN     | RNA-binding protein EWS                                                     | EWSR1   |
| Cells   | sp    | Q02127  | PYRD_HUMAN    | Dihydropyridine dehydrogenase (quinone), mitochondrial                      | DHODH   |
| Cells   | sp    | Q02218  | ODO1_HUMAN    | 2-oxoglutarate dehydrogenase, mitochondrial                                 | OGDH    |
| Cells   | sp    | Q02539  | H11_HUMAN     | Histone H1.1                                                                | H1-1    |
| Cells   | sp    | Q02790  | FKBP4_HUMAN   | Peptidyl-prolyl cis-trans isomerase FKBP4                                   | FKBP4   |
| Cells   | sp    | Q02818  | NUCB1_HUMAN   | Nucleobindin-1                                                              | NUCB1   |
| Cells   | sp    | Q02878  | RL6_HUMAN     | 60S ribosomal protein L6                                                    | RPL6    |
| Cells   | sp    | Q03113  | GNA12_HUMAN   | Guanine nucleotide-binding protein subunit alpha-12                         | GNA12   |
| Cells   | sp    | Q03135  | CAV1_HUMAN    | Caveolin-1                                                                  | CAV1    |
| Cells   | sp    | Q03154  | ACY1_HUMAN    | Aminoacylase-1                                                              | ACY1    |
| Cells   | sp    | Q03252  | LMNB2_HUMAN   | Lamin-B2                                                                    | LMNB2   |
| Cells   | sp    | Q04323  | UBXN1_HUMAN   | UBX domain-containing protein 1                                             | UBXN1   |
| Cells   | sp    | Q04446  | GLGB_HUMAN    | 1,4-alpha-glucan-branching enzyme                                           | GBE1    |
| Cells   | sp    | Q04637  | IF4G1_HUMAN   | Eukaryotic translation initiation factor 4 gamma 1                          | EIF4G1  |
| Cells   | sp    | Q04760  | LGUL_HUMAN    | Lactoylglutathione lyase                                                    | GLO1    |
| Cells   | sp    | Q04837  | SSBP_HUMAN    | Single-stranded DNA-binding protein, mitochondrial                          | SSBP1   |
| Cells   | sp    | Q04917  | 1433F_HUMAN   | 14-3-3 protein eta                                                          | YWHAH   |
| Cells   | sp    | Q05048  | CSTF1_HUMAN   | Cleavage stimulation factor subunit 1                                       | CSTF1   |
| Cells   | sp    | Q05519  | SRSF11_HUMAN  | Serine/arginine-rich splicing factor 11                                     | SRSF11  |
| Cells   | sp    | Q05682  | CALD1_HUMAN   | Caldesmon                                                                   | CALD1   |
| Cells   | sp    | Q06203  | PUR1_HUMAN    | Amidophosphoribosyltransferase                                              | PPAT    |
| Cells   | sp    | Q06323  | PSME1_HUMAN   | Proteasome activator complex subunit 1                                      | PSME1   |
| Cells   | sp    | Q06481  | APLP2_HUMAN   | Amyloid-like protein 2                                                      | APLP2   |
| Cells   | sp    | Q06787  | FMR1_HUMAN    | Synaptic functional regulator FMR1                                          | FMR1    |
| Cells   | sp    | Q07020  | RL18_HUMAN    | 60S ribosomal protein L18                                                   | RPL18   |
| Cells   | sp    | Q07021  | C1QBP_HUMAN   | Complement component 1 Q subcomponent-binding protein, mitochondrial        | C1QBP   |
| Cells   | sp    | Q07065  | CKAP4_HUMAN   | Cytoskeleton-associated protein 4                                           | CKAP4   |
| Cells   | sp    | Q07666  | KHDR1_HUMAN   | KH domain-containing, RNA-binding, signal transduction-associated protein 1 | KHDRBS1 |
| Cells   | sp    | Q07812  | BAX_HUMAN     | Apoptosis regulator BAX                                                     | BAX     |
| Cells   | sp    | Q07955  | SRSF1_HUMAN   | Serine/arginine-rich splicing factor 1                                      | SRSF1   |
| Cells   | sp    | Q08043  | ACTN3_HUMAN   | Alpha-actinin-3                                                             | ACTN3   |
| Cells   | sp    | Q08170  | SRSF4_HUMAN   | Serine/arginine-rich splicing factor 4                                      | SRSF4   |
| Cells   | sp    | Q08209  | PP2BA_HUMAN   | Serine/threonine-protein phosphatase 2B catalytic subunit alpha isoform     | PPP3CA  |
| Cells   | sp    | Q08752  | PPID_HUMAN    | Peptidyl-prolyl cis-trans isomerase D                                       | PPID    |
| Cells   | sp    | Q09028  | RBBP4_HUMAN   | Histone-binding protein RBBP4                                               | RBBP4   |
| Cells   | sp    | Q09666  | AHNAK_HUMAN   | Neuroblast differentiation-associated protein AHNAK                         | AHNAK   |
| Cells   | sp    | Q10713  | MPPA_HUMAN    | Mitochondrial-processing peptidase subunit alpha                            | PMPCA   |
| Cells   | sp    | Q12797  | ASPH_HUMAN    | Aspartyl/asparaginyl beta-hydroxylase                                       | ASPH    |
| Cells   | sp    | Q12874  | SF3A3_HUMAN   | Splicing factor 3A subunit 3                                                | SF3A3   |
| Cells   | sp    | Q12904  | AIMP1_HUMAN   | Aminoacyl tRNA synthase complex-interacting multifunctional protein 1       | AIMP1   |
| Cells   | sp    | Q12905  | ILF2_HUMAN    | Interleukin enhancer-binding factor 2                                       | ILF2    |
| Cells   | sp    | Q12906  | ILF3_HUMAN    | Interleukin enhancer-binding factor 3                                       | ILF3    |
| Cells   | sp    | Q12907  | LMAN2_HUMAN   | Vesicular integral-membrane protein VIP36                                   | LMAN2   |
| Cells   | sp    | Q12972  | PPP1R8_HUMAN  | Nuclear inhibitor of protein phosphatase 1                                  | PPP1R8  |
| Cells   | sp    | Q13011  | ECH1_HUMAN    | Delta(3,5)-Delta(2,4)-dienoyl-CoA isomerase, mitochondrial                  | ECH1    |
| Cells   | sp    | Q13151  | ROA0_HUMAN    | Heterogeneous nuclear ribonucleoprotein A0                                  | HNRNPA0 |
| Cells   | sp    | Q13162  | PRDX4_HUMAN   | Peroxisomal protein 4                                                       | PRDX4   |
| Cells   | sp    | Q13185  | CBX3_HUMAN    | Chromobox protein homolog 3                                                 | CBX3    |
| Cells   | sp    | Q13242  | SRSF9_HUMAN   | Serine/arginine-rich splicing factor 9                                      | SRSF9   |
| Cells   | sp    | Q13243  | SRSF5_HUMAN   | Serine/arginine-rich splicing factor 5                                      | SRSF5   |
| Cells   | sp    | Q13247  | SRSF6_HUMAN   | Serine/arginine-rich splicing factor 6                                      | SRSF6   |
| Cells   | sp    | Q13283  | G3BP1_HUMAN   | Ras GTPase-activating protein-binding protein 1                             | G3BP1   |
| Cells   | sp    | Q13310  | PABP4_HUMAN   | Polyadenylate-binding protein 4                                             | PABPC4  |
| Cells   | sp    | Q13347  | EIF31_HUMAN   | Eukaryotic translation initiation factor 3 subunit 1                        | EIF31   |
| Cells   | sp    | Q13363  | CTBP1_HUMAN   | C-terminal-binding protein 1                                                | CTBP1   |
| Cells   | sp    | Q13404  | UBE2V1_HUMAN  | Ubiquitin-conjugating enzyme E2 variant 1                                   | UBE2V1  |
| Cells   | sp    | Q13405  | MRPL49_HUMAN  | 39S ribosomal protein L49, mitochondrial                                    | MRPL49  |
| Cells   | sp    | Q13409  | DYNC112_HUMAN | Cytoplasmic dynein 1 intermediate chain 2                                   | DYNC112 |
| Cells   | sp    | Q13428  | TCOF1_HUMAN   | Treacle protein                                                             | TCOF1   |
| Cells   | sp    | Q13435  | SF3B2_HUMAN   | Splicing factor 3B subunit 2                                                | SF3B2   |
| Cells   | sp    | Q13438  | OS9_HUMAN     | Protein OS-9                                                                | OS9     |
| Cells   | sp    | Q13442  | HAP28_HUMAN   | 28 kDa heat- and acid-stable phosphoprotein                                 | PDAP1   |
| Cells   | sp    | Q13445  | TMED1_HUMAN   | Transmembrane emp24 domain-containing protein 1                             | TMED1   |
| Cells   | sp    | Q13510  | ASAH1_HUMAN   | Acid ceramidase                                                             | ASAH1   |
| Cells   | sp    | Q13526  | PIN1_HUMAN    | Peptidyl-prolyl cis-trans isomerase NIMA-interacting 1                      | PIN1    |

Supplementary Table 2.xlsx

| Cluster | class | UNIPROT | UNIPROT_ID   | Description                                                        | GN       |
|---------|-------|---------|--------------|--------------------------------------------------------------------|----------|
| Cells   | sp    | Q13541  | 4EBP1_HUMAN  | Eukaryotic translation initiation factor 4E-binding protein 1      | EIF4EBP1 |
| Cells   | sp    | Q13561  | DCTN2_HUMAN  | Dynactin subunit 2                                                 | DCTN2    |
| Cells   | sp    | Q13595  | TRA2A_HUMAN  | Transformer-2 protein homolog alpha                                | TRA2A    |
| Cells   | sp    | Q13630  | FCL_HUMAN    | GDP-L-fucose synthase                                              | TS1A3    |
| Cells   | sp    | Q13641  | TPBG_HUMAN   | Trophoblast glycoprotein                                           | TPBG     |
| Cells   | sp    | Q13724  | MOGS_HUMAN   | Mannosyl-oligosaccharide glucosidase                               | MOGS     |
| Cells   | sp    | Q13740  | CD166_HUMAN  | CD166 antigen                                                      | ALCAM    |
| Cells   | sp    | Q13813  | SPTN1_HUMAN  | Spectrin alpha chain, non-erythrocytic 1                           | SPTAN1   |
| Cells   | sp    | Q13838  | DX39B_HUMAN  | Spliceosome RNA helicase DDX39B                                    | DDX39B   |
| Cells   | sp    | Q13867  | BLMH_HUMAN   | Bleomycin hydrolase                                                | BLMH     |
| Cells   | sp    | Q13868  | EXOS2_HUMAN  | Exosome complex component RRP4                                     | EXOSC2   |
| Cells   | sp    | Q14011  | CIRBP_HUMAN  | Cold-inducible RNA-binding protein                                 | CIRBP    |
| Cells   | sp    | Q14103  | HNRPD_HUMAN  | Heterogeneous nuclear ribonucleoprotein D0                         | HNRNPD   |
| Cells   | sp    | Q14108  | SCRB2_HUMAN  | Lysosome membrane protein 2                                        | SCARB2   |
| Cells   | sp    | Q14141  | SEPT6_HUMAN  | Septin-6                                                           | SEPTIN6  |
| Cells   | sp    | Q14157  | UBP2L_HUMAN  | Ubiquitin-associated protein 2-like                                | UBAP2L   |
| Cells   | sp    | Q14165  | MLEC_HUMAN   | Malectin                                                           | MLEC     |
| Cells   | sp    | Q14166  | TTL12_HUMAN  | Tubulin-tyrosine ligase-like protein 12                            | TTL12    |
| Cells   | sp    | Q14197  | ICT1_HUMAN   | Peptidyl-tRNA hydrolase ICT1, mitochondrial                        | MRPL58   |
| Cells   | sp    | Q14247  | SRC8_HUMAN   | Src substrate cortactin                                            | CTTN     |
| Cells   | sp    | Q14320  | FAM50A_HUMAN | Protein FAM50A                                                     | FAM50A   |
| Cells   | sp    | Q14344  | GNA13_HUMAN  | Guanine nucleotide-binding protein subunit alpha-13                | GNA13    |
| Cells   | sp    | Q14444  | CAPR1_HUMAN  | Caprin-1                                                           | CAPRIN1  |
| Cells   | sp    | Q14498  | RBM39_HUMAN  | RNA-binding protein 39                                             | RBM39    |
| Cells   | sp    | Q14651  | PLS1_HUMAN   | Plastin-1                                                          | PLS1     |
| Cells   | sp    | Q14696  | MESD_HUMAN   | LRP chaperone MESD                                                 | MESD     |
| Cells   | sp    | Q14697  | GANAB_HUMAN  | Neutral alpha-glucosidase AB                                       | GANAB    |
| Cells   | sp    | Q14764  | MVP_HUMAN    | Major vault protein                                                | MVP      |
| Cells   | sp    | Q14847  | LASP1_HUMAN  | LIM and SH3 domain protein 1                                       | LASP1    |
| Cells   | sp    | Q14914  | PTGR1_HUMAN  | Prostaglandin reductase 1                                          | PTGR1    |
| Cells   | sp    | Q14964  | RB39A_HUMAN  | Ras-related protein Rab-39A                                        | RAB39A   |
| Cells   | sp    | Q14978  | NOLC1_HUMAN  | Nucleolar and coiled-body phosphoprotein 1                         | NOLC1    |
| Cells   | sp    | Q15006  | EMC2_HUMAN   | ER membrane protein complex subunit 2                              | EMC2     |
| Cells   | sp    | Q15007  | FL2D_HUMAN   | Pre-mRNA-splicing regulator WTAP                                   | WTAP     |
| Cells   | sp    | Q15014  | MO4L2_HUMAN  | Mortality factor 4-like protein 2                                  | MORF4L2  |
| Cells   | sp    | Q15019  | SEPT2_HUMAN  | Septin-2                                                           | SEPTIN2  |
| Cells   | sp    | Q15024  | EXOS7_HUMAN  | Exosome complex component RRP42                                    | EXOSC7   |
| Cells   | sp    | Q15029  | USS1_HUMAN   | 116 kDa U5 small nuclear ribonucleoprotein component               | EFTUD2   |
| Cells   | sp    | Q15046  | SYK_HUMAN    | Lysine-tRNA ligase                                                 | KARS1    |
| Cells   | sp    | Q15056  | IF4H_HUMAN   | Eukaryotic translation initiation factor 4H                        | EIF4H    |
| Cells   | sp    | Q15059  | BRD3_HUMAN   | Bromodomain-containing protein 3                                   | BRD3     |
| Cells   | sp    | Q15067  | ACOX1_HUMAN  | Peroxisomal acyl-coenzyme A oxidase 1                              | ACOX1    |
| Cells   | sp    | Q15084  | PDIA6_HUMAN  | Protein disulfide-isomerase A6                                     | PDIA6    |
| Cells   | sp    | Q15102  | PA1B3_HUMAN  | Platelet-activating factor acetylhydrolase IB subunit gamma        | PAFAH1B3 |
| Cells   | sp    | Q15121  | PEA15_HUMAN  | Astrocytic phosphoprotein PEA-15                                   | PEA15    |
| Cells   | sp    | Q15155  | NOMO1_HUMAN  | Nodal modulator 1                                                  | NOMO1    |
| Cells   | sp    | Q15181  | IPYR_HUMAN   | Inorganic pyrophosphatase                                          | PPA1     |
| Cells   | sp    | Q15185  | TEBP_HUMAN   | Prostaglandin E synthase 3                                         | PTGES3   |
| Cells   | sp    | Q15233  | NONO_HUMAN   | Non-POU domain-containing octamer-binding protein                  | NONO     |
| Cells   | sp    | Q15257  | PTPA_HUMAN   | Serine/threonine-protein phosphatase 2A activator                  | PTPA     |
| Cells   | sp    | Q15286  | RAB35_HUMAN  | Ras-related protein Rab-35                                         | RAB35    |
| Cells   | sp    | Q15287  | RNPS1_HUMAN  | RNA-binding protein with serine-rich domain 1                      | RNPS1    |
| Cells   | sp    | Q15293  | RCN1_HUMAN   | Reticulocalbin-1                                                   | RCN1     |
| Cells   | sp    | Q15363  | TMED2_HUMAN  | Transmembrane emp24 domain-containing protein 2                    | TMED2    |
| Cells   | sp    | Q15365  | PCBP1_HUMAN  | Poly(rC)-binding protein 1                                         | PCBP1    |
| Cells   | sp    | Q15366  | PCBP2_HUMAN  | Poly(rC)-binding protein 2                                         | PCBP2    |
| Cells   | sp    | Q15369  | ELOC_HUMAN   | Elongin-C                                                          | ELOC     |
| Cells   | sp    | Q15370  | ELOB_HUMAN   | Elongin-B                                                          | ELOB     |
| Cells   | sp    | Q15388  | TOM20_HUMAN  | Mitochondrial import receptor subunit TOM20 homolog                | TOMM20   |
| Cells   | sp    | Q15393  | SF3B3_HUMAN  | Splicing factor 3B subunit 3                                       | SF3B3    |
| Cells   | sp    | Q15404  | RSU1_HUMAN   | Ras suppressor protein 1                                           | RSU1     |
| Cells   | sp    | Q15427  | SF3B4_HUMAN  | Splicing factor 3B subunit 4                                       | SF3B4    |
| Cells   | sp    | Q15428  | SF3A2_HUMAN  | Splicing factor 3A subunit 2                                       | SF3A2    |
| Cells   | sp    | Q15435  | PPP1R7_HUMAN | Protein phosphatase 1 regulatory subunit 7                         | PPP1R7   |
| Cells   | sp    | Q15459  | SF3A1_HUMAN  | Splicing factor 3A subunit 1                                       | SF3A1    |
| Cells   | sp    | Q15631  | TSN_HUMAN    | Translin                                                           | TSN      |
| Cells   | sp    | Q15637  | SF01_HUMAN   | Splicing factor 1                                                  | SF1      |
| Cells   | sp    | Q15642  | CIP4_HUMAN   | Cdc42-interacting protein 4                                        | TRIP10   |
| Cells   | sp    | Q15651  | HMG3_HUMAN   | High mobility group nucleosome-binding domain-containing protein 3 | HMG3     |
| Cells   | sp    | Q15691  | MARE1_HUMAN  | Microtubule-associated protein RP/EB family member 1               | MAPRE1   |
| Cells   | sp    | Q15717  | ELAV1_HUMAN  | ELAV-like protein 1                                                | ELAVL1   |
| Cells   | sp    | Q15758  | AAAT_HUMAN   | Neutral amino acid transporter B(0)                                | SLC1A5   |
| Cells   | sp    | Q15771  | RAB30_HUMAN  | Ras-related protein Rab-30                                         | RAB30    |
| Cells   | sp    | Q15785  | TOM34_HUMAN  | Mitochondrial import receptor subunit TOM34                        | TOMM34   |
| Cells   | sp    | Q15819  | UB2V2_HUMAN  | Ubiquitin-conjugating enzyme E2 variant 2                          | UBE2V2   |
| Cells   | sp    | Q15836  | VAMP3_HUMAN  | Vesicle-associated membrane protein 3                              | VAMP3    |
| Cells   | sp    | Q15843  | NEDD8_HUMAN  | NEDD8                                                              | NEDD8    |
| Cells   | sp    | Q15907  | RB11B_HUMAN  | Ras-related protein Rab-11B                                        | RAB11B   |
| Cells   | sp    | Q15942  | ZYX_HUMAN    | Zyxin                                                              | ZYX      |
| Cells   | sp    | Q16181  | SEPT7_HUMAN  | Septin-7                                                           | SEPTIN7  |
| Cells   | sp    | Q16222  | UAP1_HUMAN   | UDP-N-acetylhexosamine pyrophosphorylase                           | UAP1     |
| Cells   | sp    | Q16531  | DDB1_HUMAN   | DNA damage-binding protein 1                                       | DDB1     |
| Cells   | sp    | Q16543  | CDC37_HUMAN  | Hsp90 co-chaperone Cdc37                                           | CDC37    |
| Cells   | sp    | Q16563  | SYPL1_HUMAN  | Synaptophysin-like protein 1                                       | SYPL1    |
| Cells   | sp    | Q16576  | RBBP7_HUMAN  | Histone-binding protein RBBP7                                      | RBBP7    |
| Cells   | sp    | Q16595  | FRDA_HUMAN   | Frataxin, mitochondrial                                            | FXN      |
| Cells   | sp    | Q16629  | SRSF7_HUMAN  | Serine/arginine-rich splicing factor 7                             | SRSF7    |
| Cells   | sp    | Q16630  | CPSF6_HUMAN  | Cleavage and polyadenylation specificity factor subunit 6          | CPSF6    |
| Cells   | sp    | Q16658  | FSCN1_HUMAN  | Fascin                                                             | FSCN1    |
| Cells   | sp    | Q16695  | H31T_HUMAN   | Histone H3.1t                                                      | H3-4     |

Supplementary Table 2.xlsx

| Cluster | class | UNIPROT | UNIPROT_ID   | Description                                                                                    | GN        |
|---------|-------|---------|--------------|------------------------------------------------------------------------------------------------|-----------|
| Cells   | sp    | Q16698  | DECR_HUMAN   | 2,4-dienoyl-CoA reductase, mitochondrial                                                       | DECR1     |
| Cells   | sp    | Q16718  | NDUA5_HUMAN  | NADH dehydrogenase [ubiquinone] 1 alpha subcomplex subunit 5                                   | NDUFA5    |
| Cells   | sp    | Q16762  | THTR_HUMAN   | Thiosulfate sulfurtransferase                                                                  | TST       |
| Cells   | sp    | Q16836  | HCDH_HUMAN   | Hydroxyacyl-coenzyme A dehydrogenase, mitochondrial                                            | HADH      |
| Cells   | sp    | Q16864  | VATF_HUMAN   | V-type proton ATPase subunit F                                                                 | ATP6V1F   |
| Cells   | sp    | Q16881  | TRXR1_HUMAN  | Thioredoxin reductase 1, cytoplasmic                                                           | TXNRD1    |
| Cells   | sp    | Q1KMD3  | HNRL2_HUMAN  | Heterogeneous nuclear ribonucleoprotein U-like protein 2                                       | HNRNPUL2  |
| Cells   | sp    | Q32MZ4  | LRRF1_HUMAN  | Leucine-rich repeat flightless-interacting protein 1                                           | LRRF1P1   |
| Cells   | sp    | Q32P51  | RA1L2_HUMAN  | Heterogeneous nuclear ribonucleoprotein A1-like 2                                              | HNRNP112  |
| Cells   | sp    | Q3MHD2  | LSM12_HUMAN  | Protein LSM12 homolog                                                                          | LSM12     |
| Cells   | sp    | Q3ZAQ7  | VMA21_HUMAN  | Vacuolar ATPase assembly integral membrane protein VMA21                                       | VMA21     |
| Cells   | sp    | Q4G0N4  | NAKD2_HUMAN  | NAD kinase 2, mitochondrial                                                                    | NADK2     |
| Cells   | sp    | Q4VC31  | CCD58_HUMAN  | Coiled-coil domain-containing protein 58                                                       | CCDC58    |
| Cells   | sp    | Q4VXU2  | PAP1L_HUMAN  | Polyadenylate-binding protein 1-like                                                           | PABPC1L   |
| Cells   | sp    | Q53FT3  | HIKES_HUMAN  | Protein Hikeshi                                                                                | HIKESHI   |
| Cells   | sp    | Q53H82  | LACB2_HUMAN  | Endoribonuclease LACTB2                                                                        | LACTB2    |
| Cells   | sp    | Q56UQ5  | TPT1L_HUMAN  | TPT1-like protein                                                                              | -         |
| Cells   | sp    | Q5JPE7  | NOMO2_HUMAN  | Nodal modulator 2                                                                              | NOMO2     |
| Cells   | sp    | Q5JQF8  | PAP1M_HUMAN  | Polyadenylate-binding protein 1-like 2                                                         | PABPC1L2B |
| Cells   | sp    | Q5JTV8  | TOIP1_HUMAN  | Torsin-1A-interacting protein 1                                                                | TOR1AIP1  |
| Cells   | sp    | Q5JWF2  | GNA51_HUMAN  | Guanine nucleotide-binding protein G(s) subunit alpha isoforms XLas                            | GNAS      |
| Cells   | sp    | Q5JXB2  | UE2NL_HUMAN  | Putative ubiquitin-conjugating enzyme E2 N-like                                                | UBEN2L    |
| Cells   | sp    | Q5RKV6  | EXOS6_HUMAN  | Exosome complex component MTR3                                                                 | EXOSC6    |
| Cells   | sp    | Q5T1J5  | CHCH9_HUMAN  | Putative coiled-coil-helix-coiled-coil-helix domain-containing protein CHCHD2P9, mitochondrial | CHCHD2P9  |
| Cells   | sp    | Q5T440  | CAF17_HUMAN  | Putative transferase CAF17, mitochondrial                                                      | IBA57     |
| Cells   | sp    | Q5T653  | RM02_HUMAN   | 39S ribosomal protein L2, mitochondrial                                                        | MRPL2     |
| Cells   | tr    | Q5TEC6  | Q5TEC6_HUMAN | Histone H3                                                                                     | H3-2      |
| Cells   | sp    | Q5TZA2  | CROCC_HUMAN  | Rootletin                                                                                      | CROCC     |
| Cells   | sp    | Q5VTU8  | AT5EL_HUMAN  | ATP synthase subunit epsilon-like protein, mitochondrial                                       | ATP5F1E2  |
| Cells   | sp    | Q66P13  | AR6P4_HUMAN  | ADP-ribosylation factor-like protein 6-interacting protein 4                                   | ARL6IP4   |
| Cells   | sp    | Q6DKJ4  | NXN_HUMAN    | Nucleoredoxin                                                                                  | NXN       |
| Cells   | sp    | Q6EEV6  | SUMO4_HUMAN  | Small ubiquitin-related modifier 4                                                             | SUMO4     |
| Cells   | sp    | Q6IAA8  | LTOR1_HUMAN  | Ragulator complex protein LAMTOR1                                                              | LAMTOR1   |
| Cells   | sp    | Q6IQ22  | RAB12_HUMAN  | Ras-related protein Rab-12                                                                     | RAB12     |
| Cells   | sp    | Q6IS14  | IFSAL_HUMAN  | Eukaryotic translation initiation factor 5A-1-like                                             | EIF5A11   |
| Cells   | sp    | Q6NVV1  | R13P3_HUMAN  | Putative 60S ribosomal protein L13a protein RPL13AP3                                           | RPL13AP3  |
| Cells   | sp    | Q6NX51  | IPP2B_HUMAN  | Protein phosphatase inhibitor 2 family member B                                                | PPP1R2B   |
| Cells   | sp    | Q6NXT2  | H3C_HUMAN    | Histone H3.3C                                                                                  | H3-5      |
| Cells   | sp    | Q6NZI2  | CAVIN1_HUMAN | Caveolae-associated protein 1                                                                  | CAVIN1    |
| Cells   | sp    | Q6P1N9  | TATD1_HUMAN  | Putative deoxyribonuclease TATDN1                                                              | TATDN1    |
| Cells   | sp    | Q6PIW4  | FIGL1_HUMAN  | Fidgetin-like protein 1                                                                        | FIGL1     |
| Cells   | sp    | Q6LUX0  | CWC27_HUMAN  | Spliceosome-associated protein CWC27 homolog                                                   | CWC27     |
| Cells   | sp    | Q6ZU15  | SEP14_HUMAN  | Septin-14                                                                                      | SEPTIN14  |
| Cells   | sp    | Q71D13  | H32_HUMAN    | Histone H3.2                                                                                   | H3C15     |
| Cells   | sp    | Q7KZF4  | SND1_HUMAN   | Staphylococcal nuclease domain-containing protein 1                                            | SND1      |
| Cells   | sp    | Q7L1O6  | BZW1_HUMAN   | Basic leucine zipper and W2 domain-containing protein 1                                        | BZW1      |
| Cells   | sp    | Q7L5N1  | CSN6_HUMAN   | COP9 signalosome complex subunit 6                                                             | COP56     |
| Cells   | sp    | Q722W4  | ZCCHV_HUMAN  | Zinc finger CCCH-type antiviral protein 1                                                      | ZC3HAV1   |
| Cells   | sp    | Q722W9  | RM21_HUMAN   | 39S ribosomal protein L21, mitochondrial                                                       | MRPL21    |
| Cells   | sp    | Q72406  | MYH14_HUMAN  | Myosin-14                                                                                      | MYH14     |
| Cells   | sp    | Q72422  | SZRD1_HUMAN  | SUZ domain-containing protein 1                                                                | SZRD1     |
| Cells   | sp    | Q724V5  | HDGR2_HUMAN  | Hepatoma-derived growth factor-related protein 2                                               | HDGFL2    |
| Cells   | sp    | Q724W1  | DCXR_HUMAN   | L-xylulose reductase                                                                           | DCXR      |
| Cells   | sp    | Q72519  | I2BP2_HUMAN  | Interferon regulatory factor 2-binding protein 2                                               | IRF2BP2   |
| Cells   | sp    | Q72739  | YTHD3_HUMAN  | YTH domain-containing family protein 3                                                         | YTHDF3    |
| Cells   | sp    | Q727F7  | RM55_HUMAN   | 39S ribosomal protein L55, mitochondrial                                                       | MRPL55    |
| Cells   | sp    | Q727H5  | TMED4_HUMAN  | Transmembrane emp24 domain-containing protein 4                                                | TMED4     |
| Cells   | sp    | Q865E5  | RALYL_HUMAN  | RNA-binding Raly-like protein                                                                  | RALYL     |
| Cells   | sp    | Q865F2  | GALT7_HUMAN  | N-acetylgalactosaminyltransferase 7                                                            | GALNT7    |
| Cells   | sp    | Q865X6  | GLRX5_HUMAN  | Glutaredoxin-related protein 5, mitochondrial                                                  | GLRX5     |
| Cells   | sp    | Q86U42  | PABP2_HUMAN  | Polyadenylate-binding protein 2                                                                | PABPN1    |
| Cells   | sp    | Q86UE4  | LYRIC_HUMAN  | Protein LYRIC                                                                                  | MTDH      |
| Cells   | sp    | Q86UP2  | KTN1_HUMAN   | Kinectin                                                                                       | KTN1      |
| Cells   | sp    | Q86V81  | THOC4_HUMAN  | THO complex subunit 4                                                                          | ALYREF    |
| Cells   | sp    | Q86X76  | NIT1_HUMAN   | Deaminated glutathione amidase                                                                 | NIT1      |
| Cells   | sp    | Q86Y39  | NDUAB_HUMAN  | NADH dehydrogenase [ubiquinone] 1 alpha subcomplex subunit 11                                  | NDUFA11   |
| Cells   | sp    | Q86Y56  | RAB43_HUMAN  | Ras-related protein Rab-43                                                                     | RAB43     |
| Cells   | sp    | Q81V08  | PLD3_HUMAN   | 5'-3' exonuclease PLD3                                                                         | PLD3      |
| Cells   | sp    | Q81Y67  | RAVR1_HUMAN  | Ribonucleoprotein PTB-binding 1                                                                | RAVER1    |
| Cells   | sp    | Q81YB3  | SRRM1_HUMAN  | Serine/arginine repetitive matrix protein 1                                                    | SRRM1     |
| Cells   | sp    | Q81YD1  | ERF3B_HUMAN  | Eukaryotic peptide chain release factor GTP-binding subunit ERF3B                              | GSPT2     |
| Cells   | sp    | Q81YT4  | KATL2_HUMAN  | Katanin p60 ATPase-containing subunit A-like 2                                                 | KATNAL2   |
| Cells   | sp    | Q81Z73  | RUSD2_HUMAN  | RNA pseudouridylylase synthase domain-containing protein 2                                     | RPUSD2    |
| Cells   | sp    | Q81ZP2  | ST134_HUMAN  | Putative protein FAM10A4                                                                       | ST13P4    |
| Cells   | sp    | Q8N183  | NDUF2_HUMAN  | NADH dehydrogenase [ubiquinone] 1 alpha subcomplex assembly factor 2                           | NDUFA2    |
| Cells   | sp    | Q8N4C6  | NIN_HUMAN    | Ninein                                                                                         | NIN       |
| Cells   | sp    | Q8N4P3  | MESH1_HUMAN  | Guanosine-3',5'-bis(diphosphate) 3'-pyrophosphohydrolase MESH1                                 | HDCC3     |
| Cells   | sp    | Q8N5N7  | RM50_HUMAN   | 39S ribosomal protein L50, mitochondrial                                                       | MRPL50    |
| Cells   | sp    | Q8N684  | CPSF7_HUMAN  | Cleavage and polyadenylation specificity factor subunit 7                                      | CPSF7     |
| Cells   | sp    | Q8N983  | RM43_HUMAN   | 39S ribosomal protein L43, mitochondrial                                                       | MRPL43    |
| Cells   | sp    | Q8N9N8  | EIF1A_HUMAN  | Probable RNA-binding protein EIF1AD                                                            | EIF1AD    |
| Cells   | sp    | Q8NB15  | GT251_HUMAN  | Procollagen galactosyltransferase 1                                                            | COLGALT1  |
| Cells   | sp    | Q8NB17  | SUMF2_HUMAN  | Inactive C-alpha-formylglycine-generating enzyme 2                                             | SUMF2     |
| Cells   | sp    | Q8NB59  | TXND5_HUMAN  | Thioredoxin domain-containing protein 5                                                        | TXND5     |
| Cells   | sp    | Q8NC51  | PAIRB_HUMAN  | Plasminogen activator inhibitor 1 RNA-binding protein                                          | SERP1     |
| Cells   | sp    | Q8NC56  | LEMD2_HUMAN  | LEM domain-containing protein 2                                                                | LEMD2     |
| Cells   | sp    | Q8NE71  | ABCF1_HUMAN  | ATP-binding cassette sub-family F member 1                                                     | ABCF1     |
| Cells   | sp    | Q8NEV1  | CSK23_HUMAN  | Casein kinase II subunit alpha 3                                                               | CSNK2A3   |
| Cells   | sp    | Q8NFH3  | NUP43_HUMAN  | Nucleoporin Nup43                                                                              | NUP43     |
| Cells   | sp    | Q8NFH4  | NUP37_HUMAN  | Nucleoporin Nup37                                                                              | NUP37     |

Supplementary Table 2.xlsx

| Cluster | class | UNIPROT | UNIPROT_ID   | Description                                                                                   | GN         |
|---------|-------|---------|--------------|-----------------------------------------------------------------------------------------------|------------|
| Cells   | sp    | Q8NF14  | F10A5_HUMAN  | Putative protein FAM10A5                                                                      | ST13P5     |
| Cells   | sp    | Q8NHP1  | ARK74_HUMAN  | Aflatoxin B1 aldehyde reductase member 4                                                      | AKR7L      |
| Cells   | sp    | Q8NHW5  | RLAOL_HUMAN  | 60S acidic ribosomal protein P0-like                                                          | RPLP0P6    |
| Cells   | sp    | Q8TAE8  | G451P_HUMAN  | Growth arrest and DNA damage-inducible proteins-interacting protein 1                         | GADD45GIP1 |
| Cells   | sp    | Q8TAO2  | SMRC2_HUMAN  | SWI/SNF complex subunit SMARCC2                                                               | SMARCC2    |
| Cells   | sp    | Q8TAT6  | NPL4_HUMAN   | Nuclear protein localization protein 4 homolog                                                | NPLOC4     |
| Cells   | sp    | Q8TCS8  | PNPT1_HUMAN  | Polyribonucleotide nucleotidyltransferase 1, mitochondrial                                    | PNPT1      |
| Cells   | sp    | Q8TDQ7  | GNPI2_HUMAN  | Glucosamine-6-phosphate isomerase 2                                                           | GNPDA2     |
| Cells   | sp    | Q8TEA8  | DTD1_HUMAN   | D-aminoacyl-tRNA deacylase 1                                                                  | DTD1       |
| Cells   | sp    | Q8TF74  | WIPF2_HUMAN  | WAS/WASL-interacting protein family member 2                                                  | WIPF2      |
| Cells   | sp    | Q8WTV0  | SCRIB1_HUMAN | Scavenger receptor class B member 1                                                           | SCARB1     |
| Cells   | sp    | Q8WU90  | ZC3HF_HUMAN  | Zinc finger CCHC domain-containing protein 15                                                 | ZC3H15     |
| Cells   | sp    | Q8WUA2  | PPIL4_HUMAN  | Peptidyl-prolyl cis-trans isomerase-like 4                                                    | PPIL4      |
| Cells   | sp    | Q8WUD1  | RAB2B_HUMAN  | Ras-related protein Rab-2B                                                                    | RAB2B      |
| Cells   | sp    | Q8WUD4  | CCD12_HUMAN  | Coiled-coil domain-containing protein 12                                                      | CCDC12     |
| Cells   | sp    | Q8WUF5  | IASPP_HUMAN  | RelA-associated inhibitor                                                                     | PPPIR13L   |
| Cells   | sp    | Q8WW12  | PCNP_HUMAN   | PEST proteolytic signal-containing nuclear protein                                            | PCNP       |
| Cells   | sp    | Q8WW59  | SPRY4_HUMAN  | SPRY domain-containing protein 4                                                              | SPRYD4     |
| Cells   | sp    | Q8WXF1  | PSPC1_HUMAN  | Paraspeckle component 1                                                                       | PSPC1      |
| Cells   | sp    | Q8WXX5  | DNJC9_HUMAN  | DnaJ homolog subfamily C member 9                                                             | DNJC9      |
| Cells   | sp    | Q8WY22  | BRI3B_HUMAN  | BRI3-binding protein                                                                          | BRI3BP     |
| Cells   | sp    | Q92499  | DDX1_HUMAN   | ATP-dependent RNA helicase DDX1                                                               | DDX1       |
| Cells   | sp    | Q92522  | H1X_HUMAN    | Histone H1.10                                                                                 | H1-10      |
| Cells   | sp    | Q92542  | NICA_HUMAN   | Nicastrin                                                                                     | NCSTN      |
| Cells   | sp    | Q92544  | TM9S4_HUMAN  | Transmembrane 9 superfamily member 4                                                          | TM9SF4     |
| Cells   | sp    | Q92598  | HS105_HUMAN  | Heat shock protein 105 kDa                                                                    | HSPH1      |
| Cells   | sp    | Q92599  | SEPT8_HUMAN  | Septin-8                                                                                      | SEPTIN8    |
| Cells   | sp    | Q92665  | RT31_HUMAN   | 28S ribosomal protein S31, mitochondrial                                                      | MRP531     |
| Cells   | sp    | Q92688  | AN32B_HUMAN  | Acidic leucine-rich nuclear phosphoprotein 32 family member B                                 | ANP32B     |
| Cells   | sp    | Q92692  | NECT2_HUMAN  | Nectin-2                                                                                      | NECTIN2    |
| Cells   | sp    | Q92733  | PRCC_HUMAN   | Proline-rich protein PRCC                                                                     | PRCC       |
| Cells   | sp    | Q92734  | TFG_HUMAN    | Protein TFG                                                                                   | TFG        |
| Cells   | sp    | Q92804  | RBP56_HUMAN  | TATA-binding protein-associated factor 2N                                                     | TAF15      |
| Cells   | sp    | Q92841  | DDX17_HUMAN  | Probable ATP-dependent RNA helicase DDX17                                                     | DDX17      |
| Cells   | sp    | Q92882  | OSTF1_HUMAN  | Osteoclast-stimulating factor 1                                                               | OSTF1      |
| Cells   | sp    | Q92890  | UFD1_HUMAN   | Ubiquitin recognition factor in ER-associated degradation protein 1                           | UFD1       |
| Cells   | sp    | Q92900  | RENT1_HUMAN  | Regulator of nonsense transcripts 1                                                           | UPF1       |
| Cells   | sp    | Q92922  | SMRC1_HUMAN  | SWI/SNF complex subunit SMARCC1                                                               | SMARCC1    |
| Cells   | sp    | Q92928  | RAB1C_HUMAN  | Putative Ras-related protein Rab-1C                                                           | RAB1C      |
| Cells   | sp    | Q92930  | RAB8B_HUMAN  | Ras-related protein Rab-8B                                                                    | RAB8B      |
| Cells   | sp    | Q92945  | FUBP2_HUMAN  | Far upstream element-binding protein 2                                                        | KHSRP      |
| Cells   | sp    | Q92979  | NEP1_HUMAN   | Ribosomal RNA small subunit methyltransferase NEP1                                            | EMG1       |
| Cells   | sp    | Q93045  | STMN2_HUMAN  | Stathmin-2                                                                                    | STMN2      |
| Cells   | sp    | Q969G3  | SMCE1_HUMAN  | SWI/SNF-related matrix-associated actin-dependent regulator of chromatin subfamily E member 1 | SMARCE1    |
| Cells   | sp    | Q969G5  | CAVIN3_HUMAN | Caveolae-associated protein 3                                                                 | CAVIN3     |
| Cells   | sp    | Q969H8  | MYDGF_HUMAN  | Myeloid-derived growth factor                                                                 | MYDGF      |
| Cells   | sp    | Q969X5  | ERG11_HUMAN  | Endoplasmic reticulum-Golgi intermediate compartment protein 1                                | ERGIC1     |
| Cells   | sp    | Q96A26  | F162A_HUMAN  | Protein FAM162A                                                                               | FAM162A    |
| Cells   | sp    | Q96A49  | SYAP1_HUMAN  | Synapse-associated protein 1                                                                  | SYAP1      |
| Cells   | sp    | Q96A72  | MGN2_HUMAN   | Protein mago nashi homolog 2                                                                  | MAGOHB     |
| Cells   | sp    | Q96AB3  | ISOC2_HUMAN  | Isochorismatase domain-containing protein 2                                                   | ISOC2      |
| Cells   | sp    | Q96AE4  | FUBP1_HUMAN  | Far upstream element-binding protein 1                                                        | FUBP1      |
| Cells   | sp    | Q96AG4  | LRC59_HUMAN  | Leucine-rich repeat-containing protein 59                                                     | LRRC59     |
| Cells   | sp    | Q96AX2  | RAB37_HUMAN  | Ras-related protein Rab-37                                                                    | RAB37      |
| Cells   | sp    | Q96BM9  | ARL8A_HUMAN  | ADP-ribosylation factor-like protein 8A                                                       | ARL8A      |
| Cells   | sp    | Q96BR5  | COA7_HUMAN   | Cytochrome c oxidase assembly factor 7                                                        | COA7       |
| Cells   | sp    | Q96C01  | F136A_HUMAN  | Protein FAM136A                                                                               | FAM136A    |
| Cells   | sp    | Q96C19  | EFHD2_HUMAN  | EF-hand domain-containing protein D2                                                          | EFHD2      |
| Cells   | sp    | Q96C86  | DCPS_HUMAN   | m7GpppX diphosphatase                                                                         | DCPS       |
| Cells   | sp    | Q96CN7  | ISOC1_HUMAN  | Isochorismatase domain-containing protein 1                                                   | ISOC1      |
| Cells   | sp    | Q96CT7  | CC124_HUMAN  | Coiled-coil domain-containing protein 124                                                     | CCDC124    |
| Cells   | sp    | Q96DA2  | RAB39B_HUMAN | Ras-related protein Rab-39B                                                                   | RAB39B     |
| Cells   | sp    | Q96DA6  | TIM14_HUMAN  | Mitochondrial import inner membrane translocase subunit TIM14                                 | DNJC19     |
| Cells   | sp    | Q96DB5  | RMD1_HUMAN   | Regulator of microtubule dynamics protein 1                                                   | RMDN1      |
| Cells   | sp    | Q96DG6  | CMBL_HUMAN   | Carboxymethylbenzotriazole homologue                                                          | CMBL       |
| Cells   | sp    | Q96DH6  | MSI2H_HUMAN  | RNA-binding protein Musashi homolog 2                                                         | MSI2       |
| Cells   | sp    | Q96DU9  | PABP5_HUMAN  | Polyadenylate-binding protein 5                                                               | PABPC5     |
| Cells   | sp    | Q96DV4  | MRP38_HUMAN  | 39S ribosomal protein L38, mitochondrial                                                      | MRPL38     |
| Cells   | sp    | Q96E11  | RRFM_HUMAN   | Ribosome-recycling factor, mitochondrial                                                      | MRRF       |
| Cells   | sp    | Q96E17  | RAB3C_HUMAN  | Ras-related protein Rab-3C                                                                    | RAB3C      |
| Cells   | sp    | Q96EE3  | SEH1_HUMAN   | Nucleoporin SEH1                                                                              | SEH1L      |
| Cells   | sp    | Q96EK6  | GNA1_HUMAN   | Glucosamine 6-phosphate N-acetyltransferase                                                   | GNPNAT1    |
| Cells   | sp    | Q96EL3  | RM53_HUMAN   | 39S ribosomal protein L53, mitochondrial                                                      | MRPL53     |
| Cells   | sp    | Q96EP5  | DAZP1_HUMAN  | DAZ-associated protein 1                                                                      | DAZAP1     |
| Cells   | sp    | Q96FX7  | TRM61_HUMAN  | tRNA (adenine(58)-N(1))-methyltransferase catalytic subunit TRM61A                            | TRMT61A    |
| Cells   | sp    | Q96GC5  | RM48_HUMAN   | 39S ribosomal protein L48, mitochondrial                                                      | MRPL48     |
| Cells   | sp    | Q96HC4  | PDLI5_HUMAN  | PDZ and LIM domain protein 5                                                                  | PDLIM5     |
| Cells   | sp    | Q96HE7  | ERO1A_HUMAN  | ERO1-like protein alpha                                                                       | ERO1A      |
| Cells   | sp    | Q96HN2  | SAHH3_HUMAN  | Adenosylhomocysteinase 3                                                                      | AHCLY2     |
| Cells   | sp    | Q96HY6  | DDR GK_HUMAN | DDR GK domain-containing protein 1                                                            | DDR GK1    |
| Cells   | sp    | Q96I24  | FUBP3_HUMAN  | Far upstream element-binding protein 3                                                        | FUBP3      |
| Cells   | sp    | Q96I99  | SUCB2_HUMAN  | Succinate-CoA ligase [GDP-forming] subunit beta, mitochondrial                                | SUCLG2     |
| Cells   | sp    | Q96IX5  | ATPMD_HUMAN  | ATP synthase membrane subunit DAPIT, mitochondrial                                            | ATP5MD     |
| Cells   | sp    | Q96I20  | PAWR_HUMAN   | PRK apoptosis WT1 regulator protein                                                           | PAWR       |
| Cells   | sp    | Q96JD6  | AKCL2_HUMAN  | 1,5-anhydro-D-fructose reductase                                                              | AKR1E2     |
| Cells   | sp    | Q96K17  | BT3L4_HUMAN  | Transcription factor BTF3 homolog 4                                                           | BTF3L4     |
| Cells   | sp    | Q96KP4  | CNDP2_HUMAN  | Cytosolic non-specific dipeptidase                                                            | CNDP2      |
| Cells   | sp    | Q96L46  | CPNS2_HUMAN  | Calpain small subunit 2                                                                       | CAPNS2     |
| Cells   | sp    | Q96RP9  | EFGM_HUMAN   | Elongation factor G, mitochondrial                                                            | GFM1       |
| Cells   | sp    | Q99417  | MYCBP_HUMAN  | c-Myc-binding protein                                                                         | MYCBP      |

Supplementary Table 2.xlsx

| Cluster | class | UNIPROT | UNIPROT_ID  | Description                                                                | GN       |
|---------|-------|---------|-------------|----------------------------------------------------------------------------|----------|
| Cells   | sp    | Q99426  | TBCB_HUMAN  | Tubulin-folding cofactor B                                                 | TBCB     |
| Cells   | sp    | Q99436  | PSB7_HUMAN  | Proteasome subunit beta type-7                                             | PSMB7    |
| Cells   | sp    | Q99439  | CNN2_HUMAN  | Calponin-2                                                                 | CNN2     |
| Cells   | sp    | Q99447  | PCY2_HUMAN  | Ethanolamine-phosphate cytidyllyltransferase                               | PCY2     |
| Cells   | sp    | Q99470  | SDF2_HUMAN  | Stromal cell-derived factor 2                                              | SDF2     |
| Cells   | sp    | Q99471  | PFD5_HUMAN  | Prefoldin subunit 5                                                        | PFDN5    |
| Cells   | sp    | Q99497  | PARK7_HUMAN | Parkinson disease protein 7                                                | PARK7    |
| Cells   | sp    | Q99536  | VAT1_HUMAN  | Synaptic vesicle membrane protein VAT-1 homolog                            | VAT1     |
| Cells   | sp    | Q99598  | TSNAX_HUMAN | Translin-associated protein X                                              | TSNAX    |
| Cells   | sp    | Q99614  | TTC1_HUMAN  | Tetratricopeptide repeat protein 1                                         | TTC1     |
| Cells   | sp    | Q99627  | CSN8_HUMAN  | COP9 signalosome complex subunit 8                                         | COP58    |
| Cells   | sp    | Q99714  | HCD2_HUMAN  | 3-hydroxyacyl-CoA dehydrogenase type-2                                     | HSD17B10 |
| Cells   | sp    | Q99720  | SGMR1_HUMAN | Sigma non-opioid intracellular receptor 1                                  | SIGMAR1  |
| Cells   | sp    | Q99729  | ROAA_HUMAN  | Heterogeneous nuclear ribonucleoprotein A/B                                | HNRNPAB  |
| Cells   | sp    | Q99733  | NP1L4_HUMAN | Nucleosome assembly protein 1-like 4                                       | NAP1L4   |
| Cells   | sp    | Q99798  | ACON_HUMAN  | Aconitate hydratase, mitochondrial                                         | ACO2     |
| Cells   | sp    | Q99829  | CPNE1_HUMAN | Copine-1                                                                   | CPNE1    |
| Cells   | sp    | Q99848  | EBP2_HUMAN  | Probable RNA-processing protein EBP2                                       | EBNA1BP2 |
| Cells   | sp    | Q99873  | ANM1_HUMAN  | Protein arginine N-methyltransferase 1                                     | PRMT1    |
| Cells   | sp    | Q99PW8  | NIP51_HUMAN | Protein NipSnap homolog 1                                                  | NIP5NAP1 |
| Cells   | sp    | Q99PX5  | ARP5L_HUMAN | Actin-related protein 2/3 complex subunit 5-like protein                   | ARPC5L   |
| Cells   | sp    | Q99Q61  | TRIR_HUMAN  | Telomerase RNA component interacting RNase                                 | TRIR     |
| Cells   | sp    | Q99Q69  | MACD1_HUMAN | ADP-ribose glycohydrolase MACROD1                                          | MACROD1  |
| Cells   | sp    | Q99QA1  | MEP50_HUMAN | Methylosome protein 50                                                     | WDR77    |
| Cells   | sp    | Q99R76  | COR1B_HUMAN | Coronin-1B                                                                 | COR01B   |
| Cells   | sp    | Q99RA2  | TXD17_HUMAN | Thioredoxin domain-containing protein 17                                   | TXNDC17  |
| Cells   | sp    | Q99R12  | RM45_HUMAN  | 39S ribosomal protein L45, mitochondrial                                   | MRPL45   |
| Cells   | sp    | Q99R16  | CG050_HUMAN | Uncharacterized protein C7orf50                                            | C7orf50  |
| Cells   | sp    | Q99RL6  | SRSF8_HUMAN | Serine/arginine-rich splicing factor 8                                     | SRSF8    |
| Cells   | sp    | Q99RP8  | PYM1_HUMAN  | Partner of Y14 and mago                                                    | PYM1     |
| Cells   | sp    | Q99RX8  | PXL2A_HUMAN | Peroxiredoxin-like 2A                                                      | PRXL2A   |
| Cells   | sp    | Q99S26  | ERP44_HUMAN | Endoplasmic reticulum resident protein 44                                  | ERP44    |
| Cells   | sp    | Q99S18  | ESYT1_HUMAN | Extended synaptotagmin-1                                                   | ESYT1    |
| Cells   | sp    | Q99TM9  | URM1_HUMAN  | Ubiquitin-related modifier 1                                               | URM1     |
| Cells   | sp    | Q99TT0  | AN32E_HUMAN | Acidic leucine-rich nuclear phosphoprotein 32 family member E              | ANP32E   |
| Cells   | sp    | Q99TU6  | P4K2A_HUMAN | Phosphatidylinositol 4-kinase type 2-alpha                                 | PI4K2A   |
| Cells   | sp    | Q99TV4  | TMM43_HUMAN | Transmembrane protein 43                                                   | TMM43    |
| Cells   | sp    | Q99U61  | NDUF3_HUMAN | NADH dehydrogenase [ubiquinone] 1 alpha subcomplex assembly factor 3       | NDUFAF3  |
| Cells   | sp    | Q99U89  | DOHH_HUMAN  | Deoxyhypusine hydroxylase                                                  | DOHH     |
| Cells   | sp    | Q99UB7  | TMM70_HUMAN | Transmembrane protein 70, mitochondrial                                    | TMM70    |
| Cells   | sp    | Q99UJ2  | HNR1L_HUMAN | Heterogeneous nuclear ribonucleoprotein U-like protein 1                   | HNRNPUL1 |
| Cells   | sp    | Q99UL8  | PDC10_HUMAN | Programmed cell death protein 10                                           | PDC10    |
| Cells   | sp    | Q99UP3  | HTAI2_HUMAN | Oxidoreductase HTATIP2                                                     | HTATIP2  |
| Cells   | sp    | Q99V40  | VAMP8_HUMAN | Vesicle-associated membrane protein 8                                      | VAMP8    |
| Cells   | sp    | Q99V57  | MTND_HUMAN  | 1,2-dihydroxy-3-keto-5-methylthiopentene dioxygenase                       | ADI1     |
| Cells   | sp    | Q99VC6  | TM109_HUMAN | Transmembrane protein 109                                                  | TMM109   |
| Cells   | sp    | Q99VK6  | TMED9_HUMAN | Transmembrane emp24 domain-containing protein 9                            | TMED9    |
| Cells   | sp    | Q99X68  | HINT2_HUMAN | Histidine triad nucleotide-binding protein 2, mitochondrial                | HINT2    |
| Cells   | sp    | Q99XK5  | B2L13_HUMAN | Bcl-2-like protein 13                                                      | BCL2L13  |
| Cells   | sp    | Q99XR0  | TGT_HUMAN   | Queuine tRNA-ribosyltransferase catalytic subunit 1                        | QTRT1    |
| Cells   | sp    | Q99Y43  | CHM4A_HUMAN | Charged multivesicular body protein 4a                                     | CHMP4A   |
| Cells   | sp    | Q99Y44  | EIF2A_HUMAN | Eukaryotic translation initiation factor 2A                                | EIF2A    |
| Cells   | sp    | Q99YD1  | RM13_HUMAN  | 39S ribosomal protein L13, mitochondrial                                   | MRPL13   |
| Cells   | sp    | Q99YD3  | RM04_HUMAN  | 39S ribosomal protein L4, mitochondrial                                    | MRPL4    |
| Cells   | sp    | Q99YD6  | RM01_HUMAN  | 39S ribosomal protein L1, mitochondrial                                    | MRPL1    |
| Cells   | sp    | Q99ZE1  | RM37_HUMAN  | 39S ribosomal protein L37, mitochondrial                                   | MRPL37   |
| Cells   | sp    | Q99ZK3  | NACP4_HUMAN | Putative nascent polypeptide-associated complex subunit alpha-like protein | NACP4P   |
| Cells   | sp    | Q99C05  | DPY30_HUMAN | Protein dpy-30 homolog                                                     | DPY30    |
| Cells   | sp    | Q99ZP4  | PITH1_HUMAN | PITH domain-containing protein 1                                           | PITHD1   |
| Cells   | sp    | Q99ZS3  | WDR61_HUMAN | WD repeat-containing protein 61                                            | WDR61    |
| Cells   | sp    | Q99ZT3  | SLIRP_HUMAN | SRA stem-loop-interacting RNA-binding protein, mitochondrial               | SLIRP    |
| Cells   | sp    | Q99ZT8  | NIF3L_HUMAN | NIF3-like protein 1                                                        | NIF3L1   |
| Cells   | sp    | Q99ZV4  | IF5A2_HUMAN | Eukaryotic translation initiation factor 5A-2                              | EIF5A2   |
| Cells   | sp    | Q9H082  | RB33B_HUMAN | Ras-related protein Rab-33B                                                | RAB33B   |
| Cells   | sp    | Q9H0D6  | XRN2_HUMAN  | 5'-3' exoribonuclease 2                                                    | XRN2     |
| Cells   | sp    | Q9H0L4  | CSTFT_HUMAN | Cleavage stimulation factor subunit 2 tau variant                          | CSTFT2   |
| Cells   | sp    | Q9H0Q0  | CYRIA_HUMAN | CYFIP-related Rac1 interactor A                                            | CYRIA    |
| Cells   | sp    | Q9H0U4  | RAB1B_HUMAN | Ras-related protein Rab-1B                                                 | RAB1B    |
| Cells   | sp    | Q9H299  | SH3L3_HUMAN | SH3 domain-binding glutamic acid-rich-like protein 3                       | SH3BGL3  |
| Cells   | sp    | Q9H2H8  | PPIL3_HUMAN | Peptidyl-prolyl cis-trans isomerase-like 3                                 | PPIL3    |
| Cells   | sp    | Q9H2U2  | IPYR2_HUMAN | Inorganic pyrophosphatase 2, mitochondrial                                 | PPA2     |
| Cells   | sp    | Q9H2W6  | RM46_HUMAN  | 39S ribosomal protein L46, mitochondrial                                   | MRPL46   |
| Cells   | sp    | Q9H307  | PININ_HUMAN | Pinin                                                                      | PNN      |
| Cells   | sp    | Q9H361  | PABP3_HUMAN | Polyadenylate-binding protein 3                                            | PABPC3   |
| Cells   | sp    | Q9H3H3  | CK068_HUMAN | UPF0696 protein C11orf68                                                   | C11orf68 |
| Cells   | sp    | Q9H3K6  | BOLA2_HUMAN | BolaA-like protein 2                                                       | BOLA2B   |
| Cells   | sp    | Q9H3N1  | TMX1_HUMAN  | Thioredoxin-related transmembrane protein 1                                | TMX1     |
| Cells   | sp    | Q9H3P2  | NELFA_HUMAN | Negative elongation factor A                                               | NELFA    |
| Cells   | sp    | Q9H3P7  | GCP60_HUMAN | Golgi resident protein GCP60                                               | ACBD3    |
| Cells   | sp    | Q9H3Z4  | DNJC5_HUMAN | DnaJ homolog subfamily C member 5                                          | DNAJC5   |
| Cells   | sp    | Q9H444  | CHM4B_HUMAN | Charged multivesicular body protein 4b                                     | CHMP4B   |
| Cells   | sp    | Q9H5V8  | CDCP1_HUMAN | CUB domain-containing protein 1                                            | CDCP1    |
| Cells   | sp    | Q9H773  | DCTP1_HUMAN | dCTP pyrophosphatase 1                                                     | DCTPP1   |
| Cells   | sp    | Q9H7Z7  | PGES2_HUMAN | Prostaglandin E synthase 2                                                 | PTGES2   |
| Cells   | sp    | Q9H8Y8  | GORS2_HUMAN | Golgi reassembly-stacking protein 2                                        | GORASP2  |
| Cells   | sp    | Q9H910  | JUPI2_HUMAN | Jupiter microtubule associated homolog 2                                   | JPT2     |
| Cells   | sp    | Q9H9H4  | VP37B_HUMAN | Vacuolar protein sorting-associated protein 37B                            | VPS37B   |
| Cells   | sp    | Q9H9J2  | RM44_HUMAN  | 39S ribosomal protein L44, mitochondrial                                   | MRPL44   |
| Cells   | sp    | Q9HAV0  | GBB4_HUMAN  | Guanine nucleotide-binding protein subunit beta-4                          | GNB4     |
| Cells   | sp    | Q9HAV7  | GRPE1_HUMAN | GrpE protein homolog 1, mitochondrial                                      | GRPEL1   |

Supplementary Table 2.xlsx

| Cluster | class | UNIPROT | UNIPROT_ID   | Description                                                                 | GN        |
|---------|-------|---------|--------------|-----------------------------------------------------------------------------|-----------|
| Cells   | sp    | Q9HB07  | MYG1_HUMAN   | UPF0160 protein MYG1, mitochondrial                                         | C12orf10  |
| Cells   | sp    | Q9HB40  | RISC_HUMAN   | Retinoid-inducible serine carboxypeptidase                                  | SCPEP1    |
| Cells   | sp    | Q9HB71  | CYBP_HUMAN   | Calcyclin-binding protein                                                   | CACYBP    |
| Cells   | sp    | Q9HC38  | GLDD4_HUMAN  | Glyoxalase domain-containing protein 4                                      | GLDD4     |
| Cells   | sp    | Q9HCC0  | MCCB_HUMAN   | Methylcrotonoyl-CoA carboxylase beta chain, mitochondrial                   | MCCC2     |
| Cells   | sp    | Q9HCE1  | MOV10_HUMAN  | Helicase MOV-10                                                             | MOV10     |
| Cells   | sp    | Q9HDC9  | APMAP_HUMAN  | Adipocyte plasma membrane-associated protein                                | APMAP     |
| Cells   | sp    | Q9NNW7  | TRXR2_HUMAN  | Thioredoxin reductase 2, mitochondrial                                      | TXNRD2    |
| Cells   | sp    | Q9NP72  | RAB18_HUMAN  | Ras-related protein Rab-18                                                  | RAB18     |
| Cells   | sp    | Q9NP77  | SSU72_HUMAN  | RNA polymerase II subunit A C-terminal domain phosphatase SSU72             | SSU72     |
| Cells   | sp    | Q9NP79  | VTA1_HUMAN   | Vacuolar protein sorting-associated protein VTA1 homolog                    | VTA1      |
| Cells   | sp    | Q9NP81  | SYSM_HUMAN   | Serine-tRNA ligase, mitochondrial                                           | SARS2     |
| Cells   | sp    | Q9NP92  | RT30_HUMAN   | 39S ribosomal protein S30, mitochondrial                                    | MRPS30    |
| Cells   | sp    | Q9NP97  | DLRB1_HUMAN  | Dynein light chain roadblock-type 1                                         | DYNLRB1   |
| Cells   | sp    | Q9NP92  | INO1_HUMAN   | Inositol-3-phosphate synthase 1                                             | ISYNA1    |
| Cells   | sp    | Q9NPJ3  | ACO13_HUMAN  | Acyl-coenzyme A thioesterase 13                                             | ACOT13    |
| Cells   | sp    | Q9NQ29  | LUC7L_HUMAN  | Putative RNA-binding protein Luc7-like 1                                    | LUC7L     |
| Cells   | sp    | Q9NQ39  | RS10L_HUMAN  | Putative 40S ribosomal protein S10-like                                     | RPS10P5   |
| Cells   | sp    | Q9NQ48  | LZTL1_HUMAN  | Leucine zipper transcription factor-like protein 1                          | LZTFL1    |
| Cells   | sp    | Q9NQ50  | RM40_HUMAN   | 39S ribosomal protein L40, mitochondrial                                    | MRPL40    |
| Cells   | sp    | Q9NQC3  | RTN4_HUMAN   | Reticulon-4                                                                 | RTN4      |
| Cells   | sp    | Q9NQH7  | XPP3_HUMAN   | Xaa-Pro aminopeptidase 3                                                    | XPPEP3    |
| Cells   | sp    | Q9NQP4  | PFD4_HUMAN   | Prefoldin subunit 4                                                         | PFDN4     |
| Cells   | sp    | Q9NQR4  | NIT2_HUMAN   | Omega-amidase NIT2                                                          | NIT2      |
| Cells   | sp    | Q9NR22  | ANM8_HUMAN   | Protein arginine N-methyltransferase 8                                      | PRMT8     |
| Cells   | sp    | Q9NR28  | DBLOH_HUMAN  | Diablo homolog, mitochondrial                                               | DIABLO    |
| Cells   | sp    | Q9NR31  | SAR1A_HUMAN  | GTP-binding protein SAR1a                                                   | SAR1A     |
| Cells   | sp    | Q9NR45  | SIAS_HUMAN   | Sialic acid synthase                                                        | NANS      |
| Cells   | sp    | Q9NR46  | SHLB2_HUMAN  | Endophilin-B2                                                               | SH3GLB2   |
| Cells   | sp    | Q9NR55  | UBQL4_HUMAN  | Ubiquilin-4                                                                 | UBQLN4    |
| Cells   | sp    | Q9NRV9  | HEBP1_HUMAN  | Heme-binding protein 1                                                      | HEBP1     |
| Cells   | sp    | Q9NRW1  | RAB6B_HUMAN  | Ras-related protein Rab-6B                                                  | RAB6B     |
| Cells   | sp    | Q9NRX2  | RM17_HUMAN   | 39S ribosomal protein L17, mitochondrial                                    | MRPL17    |
| Cells   | sp    | Q9NRX4  | PHP14_HUMAN  | 14 kDa phosphohistidine phosphatase                                         | PHPT1     |
| Cells   | sp    | Q9NS69  | TOM22_HUMAN  | Mitochondrial import receptor subunit TOM22 homolog                         | TOMM22    |
| Cells   | sp    | Q9NTK5  | OLA1_HUMAN   | Obg-like ATPase 1                                                           | OLA1      |
| Cells   | sp    | Q9NUM4  | T106B_HUMAN  | Transmembrane protein 106B                                                  | TMEM106B  |
| Cells   | sp    | Q9NUP9  | LIN7C_HUMAN  | Protein lin-7 homolog C                                                     | LIN7C     |
| Cells   | sp    | Q9NUO9  | CYRIB_HUMAN  | CYFIP-related Rac1 interactor B                                             | CYRIB     |
| Cells   | sp    | Q9NVA2  | SEP11_HUMAN  | Septin-11                                                                   | SEPTIN11  |
| Cells   | sp    | Q9NV12  | ARL8B_HUMAN  | ADP-ribosylation factor-like protein 8B                                     | ARL8B     |
| Cells   | sp    | Q9NWX4  | CZIB_HUMAN   | CXXC motif containing zinc binding protein                                  | CZIB      |
| Cells   | sp    | Q9NX14  | NDUBB_HUMAN  | NADH dehydrogenase [ubiquinone] 1 beta subcomplex subunit 11, mitochondrial | NDUFB11   |
| Cells   | sp    | Q9NX40  | OCAD1_HUMAN  | OCIA domain-containing protein 1                                            | OCIAD1    |
| Cells   | sp    | Q9NX55  | HYPK_HUMAN   | Huntingtin-interacting protein K                                            | HYPK      |
| Cells   | sp    | Q9NX52  | QPCTL_HUMAN  | Glutamyl-peptide cyclotransferase-like protein                              | QPCTL     |
| Cells   | sp    | Q9NY12  | GAR1_HUMAN   | H/ACA ribonucleoprotein complex subunit 1                                   | GAR1      |
| Cells   | sp    | Q9NYF8  | BCLF1_HUMAN  | Bcl-2-associated transcription factor 1                                     | BCLAF1    |
| Cells   | sp    | Q9NYK5  | RM39_HUMAN   | 39S ribosomal protein L39, mitochondrial                                    | MRPL39    |
| Cells   | sp    | Q9NYL9  | TMOD3_HUMAN  | Tropomodulin-3                                                              | TMOD3     |
| Cells   | sp    | Q9NZ18  | IF2B1_HUMAN  | Insulin-like growth factor 2 mRNA-binding protein 1                         | IGF2BP1   |
| Cells   | sp    | Q9NZL9  | MAT2B_HUMAN  | Methionine adenosyltransferase 2 subunit beta                               | MAT2B     |
| Cells   | sp    | Q9NZM1  | MYOF_HUMAN   | Myoferlin                                                                   | MYOF      |
| Cells   | sp    | Q9NZZ3  | CHMP5_HUMAN  | Charged multivesicular body protein 5                                       | CHMP5     |
| Cells   | sp    | Q9P015  | RM15_HUMAN   | 39S ribosomal protein L15, mitochondrial                                    | MRPL15    |
| Cells   | sp    | Q9P010  | NDUAD_HUMAN  | NADH dehydrogenase [ubiquinone] 1 alpha subcomplex subunit 13               | NDUFA13   |
| Cells   | sp    | Q9P010  | VAPA_HUMAN   | Vesicle-associated membrane protein-associated protein A                    | VAPA      |
| Cells   | sp    | Q9P258  | RCC2_HUMAN   | Protein RCC2                                                                | RCC2      |
| Cells   | sp    | Q9P287  | BCCIP_HUMAN  | BRCA2 and CDKN1A-interacting protein                                        | BCCIP     |
| Cells   | sp    | Q9P2E9  | RRBP1_HUMAN  | Ribosome-binding protein 1                                                  | RRBP1     |
| Cells   | sp    | Q9P2T1  | GMFR2_HUMAN  | GMP reductase 2                                                             | GMFR2     |
| Cells   | sp    | Q9UBE0  | SAE1_HUMAN   | SUMO-activating enzyme subunit 1                                            | SAE1      |
| Cells   | sp    | Q9UBI6  | GBG12_HUMAN  | Guanine nucleotide-binding protein G(I)/G(S)/G(O) subunit gamma-12          | GNG12     |
| Cells   | sp    | Q9UBP6  | TRMB_HUMAN   | tRNA (guanine-N(7))-methyltransferase                                       | METTL1    |
| Cells   | sp    | Q9UBQ0  | VPS29_HUMAN  | Vacuolar protein sorting-associated protein 29                              | VPS29     |
| Cells   | sp    | Q9UBQ7  | GRHPR_HUMAN  | Glyoxylate reductase/hydroxypyruvate reductase                              | GRHPR     |
| Cells   | sp    | Q9UBR2  | CATZ_HUMAN   | Cathepsin Z                                                                 | CTSZ      |
| Cells   | sp    | Q9UBS4  | DJB11_HUMAN  | DnaJ homolog subfamily B member 11                                          | DNAJB11   |
| Cells   | sp    | Q9UBW8  | CSN7A_HUMAN  | COP9 signalosome complex subunit 7a                                         | COPS7A    |
| Cells   | sp    | Q9UFN0  | NPS3A_HUMAN  | Protein NipSnap homolog 3A                                                  | NIPSNAP3A |
| Cells   | sp    | Q9UGI8  | TES_HUMAN    | Testin                                                                      | TES       |
| Cells   | sp    | Q9UHD1  | CHRD1_HUMAN  | Cysteine and histidine-rich domain-containing protein 1                     | CHORDC1   |
| Cells   | sp    | Q9UHD8  | SEPT9_HUMAN  | Septin-9                                                                    | SEPTIN9   |
| Cells   | sp    | Q9UHD9  | UBQL2_HUMAN  | Ubiquilin-2                                                                 | UBQLN2    |
| Cells   | sp    | Q9UHG3  | PCYOX_HUMAN  | Preylcysteine oxidase 1                                                     | PCYOX1    |
| Cells   | sp    | Q9UHV9  | PFD2_HUMAN   | Prefoldin subunit 2                                                         | PFDN2     |
| Cells   | sp    | Q9UHX1  | PUF60_HUMAN  | Poly(U)-binding-splicing factor PUF60                                       | PUF60     |
| Cells   | sp    | Q9UI15  | TAGL3_HUMAN  | Transgelin-3                                                                | TAGLN3    |
| Cells   | sp    | Q9UI30  | TRM112_HUMAN | Multifunctional methyltransferase subunit TRM112-like protein               | TRMT112   |
| Cells   | sp    | Q9UIJ6  | DBNL_HUMAN   | Drebrin-like protein                                                        | DBNL      |
| Cells   | sp    | Q9UIZ1  | STML2_HUMAN  | Stomatol-like protein 2, mitochondrial                                      | STOML2    |
| Cells   | sp    | Q9UK45  | LSM7_HUMAN   | U6 snRNA-associated Sm-like protein LSM7                                    | LSM7      |
| Cells   | sp    | Q9UK76  | JUPI1_HUMAN  | Jupiter microtubule associated homolog 1                                    | JPT1      |
| Cells   | sp    | Q9UKA9  | PTBP2_HUMAN  | Poly(pyrimidine tract-binding protein 2                                     | PTBP2     |
| Cells   | sp    | Q9UKK9  | NUDT5_HUMAN  | ADP-sugar pyrophosphatase                                                   | NUDT5     |
| Cells   | sp    | Q9UKM9  | RALY_HUMAN   | RNA-binding protein Raly                                                    | RALY      |
| Cells   | sp    | Q9UKV3  | ACIN1_HUMAN  | Apoptotic chromatin condensation inducer in the nucleus                     | ACIN1     |
| Cells   | sp    | Q9UKY7  | CDV3_HUMAN   | Protein CDV3 homolog                                                        | CDV3      |
| Cells   | sp    | Q9UL46  | PSME2_HUMAN  | Proteasome activator complex subunit 2                                      | PSME2     |
| Cells   | sp    | Q9ULC4  | MCTS1_HUMAN  | Malignant T-cell-amplified sequence 1                                       | MCTS1     |

Supplementary Table 2.xlsx

| Cluster        | class | UNIPROT    | UNIPROT_ID       | Description                                                       | GN           |
|----------------|-------|------------|------------------|-------------------------------------------------------------------|--------------|
| Cells          | sp    | Q9ULD0     | OGDHL_HUMAN      | 2-oxoglutarate dehydrogenase-like, mitochondrial                  | OGDHL        |
| Cells          | sp    | Q9ULR0     | ISY1_HUMAN       | Pre-mRNA-splicing factor ISY1 homolog                             | ISY1         |
| Cells          | sp    | Q9ULV4     | COR1C_HUMAN      | Coronin-1C                                                        | CORO1C       |
| Cells          | sp    | Q9UM00     | TMCO1_HUMAN      | Calcium load-activated calcium channel                            | TMCO1        |
| Cells          | sp    | Q9UMX0     | UBQL1_HUMAN      | Ubiquilin-1                                                       | UBQLN1       |
| Cells          | sp    | Q9UMY4     | SNX12_HUMAN      | Sorting nexin-12                                                  | SNX12        |
| Cells          | sp    | Q9UN37     | VPS4A_HUMAN      | Vacuolar protein sorting-associated protein 4A                    | VPS4A        |
| Cells          | sp    | Q9UN86     | G3BP2_HUMAN      | Ras GTPase-activating protein-binding protein 2                   | G3BP2        |
| Cells          | sp    | Q9UNF0     | PACN2_HUMAN      | Protein kinase C and casein kinase substrate in neurons protein 2 | PACSN2       |
| Cells          | sp    | Q9UNP9     | PPIE_HUMAN       | Peptidyl-prolyl cis-trans isomerase E                             | PPIE         |
| Cells          | sp    | Q9UNZ2     | NSFL1C_HUMAN     | NSFL1 cofactor p47                                                | NSFL1C       |
| Cells          | sp    | Q9UQ35     | SRRM2_HUMAN      | Serine/arginine repetitive matrix protein 2                       | SRRM2        |
| Cells          | sp    | Q9UQ80     | PA2G4_HUMAN      | Proliferation-associated protein 2G4                              | PA2G4        |
| Cells          | sp    | Q9Y224     | RTRAF_HUMAN      | RNA transcription, translation and transport factor protein       | RTRAF        |
| Cells          | sp    | Q9Y230     | RUVB2_HUMAN      | RuvB-like 2                                                       | RUVBL2       |
| Cells          | sp    | Q9Y237     | PIN4_HUMAN       | Peptidyl-prolyl cis-trans isomerase NIMA-interacting 4            | PIN4         |
| Cells          | sp    | Q9Y265     | RUVB1_HUMAN      | RuvB-like 1                                                       | RUVBL1       |
| Cells          | sp    | Q9Y266     | NUDC_HUMAN       | Nuclear migration protein nudC                                    | NUDC         |
| Cells          | sp    | Q9Y276     | BCS1_HUMAN       | Mitochondrial chaperone BCS1                                      | BCS1L        |
| Cells          | sp    | Q9Y277     | VDAC3_HUMAN      | Voltage-dependent anion-selective channel protein 3               | VDAC3        |
| Cells          | sp    | Q9Y285     | SYFA_HUMAN       | Phenylalanine-tRNA ligase alpha subunit                           | FARSA        |
| Cells          | sp    | Q9Y280     | CNPY2_HUMAN      | Protein canopy homolog 2                                          | CNPY2        |
| Cells          | sp    | Q9Y209     | RT28_HUMAN       | 28S ribosomal protein S28, mitochondrial                          | MRPS28       |
| Cells          | sp    | Q9Y2R0     | COA3_HUMAN       | Cytochrome c oxidase assembly factor 3 homolog, mitochondrial     | COA3         |
| Cells          | sp    | Q9Y2R9     | RT07_HUMAN       | 28S ribosomal protein S7, mitochondrial                           | MRPS7        |
| Cells          | sp    | Q9Y2T7     | YBOX2_HUMAN      | Y-box-binding protein 2                                           | YBX2         |
| Cells          | sp    | Q9Y2V2     | CHSP1_HUMAN      | Calcium-regulated heat-stable protein 1                           | CARHSP1      |
| Cells          | sp    | Q9Y2W1     | TR150_HUMAN      | Thyroid hormone receptor-associated protein 3                     | THRAP3       |
| Cells          | sp    | Q9Y2W2     | WBP11_HUMAN      | WW domain-binding protein 11                                      | WBP11        |
| Cells          | sp    | Q9Y333     | LSM2_HUMAN       | U6 snRNA-associated Sm-like protein LSm2                          | LSM2         |
| Cells          | sp    | Q9Y383     | LC7L2_HUMAN      | Putative RNA-binding protein Luc7-like 2                          | LUC7L2       |
| Cells          | sp    | Q9Y394     | DHRS7_HUMAN      | Dehydrogenase/reductase SDR family member 7                       | DHRS7        |
| Cells          | sp    | Q9Y383     | TMED7_HUMAN      | Transmembrane emp24 domain-containing protein 7                   | TMED7        |
| Cells          | sp    | Q9Y3B7     | RM11_HUMAN       | 39S ribosomal protein L11, mitochondrial                          | MRPL11       |
| Cells          | sp    | Q9Y3B8     | ORN_HUMAN        | Oligoribonuclease, mitochondrial                                  | REXO2        |
| Cells          | sp    | Q9Y3C1     | NOP16_HUMAN      | Nucleolar protein 16                                              | NOP16        |
| Cells          | sp    | Q9Y3C6     | PPIL1_HUMAN      | Peptidyl-prolyl cis-trans isomerase-like 1                        | PPIL1        |
| Cells          | sp    | Q9Y3D6     | FIS1_HUMAN       | Mitochondrial fission 1 protein                                   | FIS1         |
| Cells          | sp    | Q9Y3D7     | TIM16_HUMAN      | Mitochondrial import inner membrane translocase subunit TIM16     | PAM16        |
| Cells          | sp    | Q9Y3D9     | RT23_HUMAN       | 28S ribosomal protein S23, mitochondrial                          | MRPS23       |
| Cells          | sp    | Q9Y3E1     | HDGR3_HUMAN      | Hepatoma-derived growth factor-related protein 3                  | HDFGL3       |
| Cells          | sp    | Q9Y3F4     | STRAP_HUMAN      | Serine-threonine kinase receptor-associated protein               | STRAP        |
| Cells          | sp    | Q9Y3I5     | RAP2C_HUMAN      | Ras-related protein Rap-2c                                        | RAP2C        |
| Cells          | sp    | Q9Y3U8     | RL36_HUMAN       | 60S ribosomal protein L36                                         | RPL36        |
| Cells          | sp    | Q9Y3Y2     | CHTOP_HUMAN      | Chromatin target of PRMT1 protein                                 | CHTOP        |
| Cells          | sp    | Q9Y4L1     | HYOU1_HUMAN      | Hypoxia up-regulated protein 1                                    | HYOU1        |
| Cells          | sp    | Q9Y4Z0     | LSM4_HUMAN       | U6 snRNA-associated Sm-like protein LSm4                          | LSM4         |
| Cells          | sp    | Q9Y536     | PAL4A_HUMAN      | Peptidyl-prolyl cis-trans isomerase A-like 4A                     | PPIAL4A      |
| Cells          | sp    | Q9Y5A9     | YTHDF2_HUMAN     | YTH domain-containing family protein 2                            | YTHDF2       |
| Cells          | sp    | Q9Y5J7     | TIM9_HUMAN       | Mitochondrial import inner membrane translocase subunit Tim9      | TIMM9        |
| Cells          | sp    | Q9Y5K6     | CD2AP_HUMAN      | CD2-associated protein                                            | CD2AP        |
| Cells          | sp    | Q9Y5K8     | VATD_HUMAN       | V-type proton ATPase subunit D                                    | ATP6V1D      |
| Cells          | sp    | Q9Y5L4     | TIM13_HUMAN      | Mitochondrial import inner membrane translocase subunit Tim13     | TIMM13       |
| Cells          | sp    | Q9Y5S9     | RBM8A_HUMAN      | RNA-binding protein 8A                                            | RBM8A        |
| Cells          | sp    | Q9Y6I7     | SERC_HUMAN       | Phosphoserine aminotransferase                                    | PSAT1        |
| Cells          | sp    | Q9Y624     | JAM1_HUMAN       | Junctional adhesion molecule A                                    | F11R         |
| Cells          | sp    | Q9Y639     | NPTN_HUMAN       | Neuroplastin                                                      | NPTN         |
| Cells          | sp    | Q9Y6B6     | SAR1B_HUMAN      | GTP-binding protein SAR1b                                         | SAR1B        |
| Cells          | sp    | Q9Y6G9     | DC1L1_HUMAN      | Cytoplasmic dynein 1 light intermediate chain 1                   | DYNC1L1      |
| Cells          | sp    | Q9Y6H1     | CHCH2_HUMAN      | Coiled-coil-helix-coiled-coil-helix domain-containing protein 2   | CHCHD2       |
| Cells          | sp    | Q9Y6I3     | EPN1_HUMAN       | Epsin-1                                                           | EPN1         |
| Cells          | sp    | Q9Y6M1     | IF2B2_HUMAN      | Insulin-like growth factor 2 mRNA-binding protein 2               | IGF2BP2      |
| Cells&Exosomes | tr    | A0A2R8Y619 | A0A2R8Y619_HUMAN | Histone H2B                                                       | LOC114483833 |
| Cells&Exosomes | sp    | A5A3E0     | POTEF_HUMAN      | POTE ankyrin domain family member F                               | POTEF        |
| Cells&Exosomes | sp    | A6NIZ1     | RP1BL_HUMAN      | Ras-related protein Rap-1b-like protein                           | -            |
| Cells&Exosomes | sp    | A6NMY6     | AXA2L_HUMAN      | Putative annexin A2-like protein                                  | ANXA2P2      |
| Cells&Exosomes | sp    | A6NNZ2     | TUBB8B_HUMAN     | Tubulin beta 8B                                                   | TUBB8B       |
| Cells&Exosomes | sp    | O00299     | CLIC1_HUMAN      | Chloride intracellular channel protein 1                          | CLIC1        |
| Cells&Exosomes | sp    | O14556     | G3PT_HUMAN       | Glyceraldehyde-3-phosphate dehydrogenase, testis-specific         | GAPDHS       |
| Cells&Exosomes | sp    | O14818     | PSA7_HUMAN       | Proteasome subunit alpha type-7                                   | PSMA7        |
| Cells&Exosomes | sp    | O43175     | SERA_HUMAN       | D-3-phosphoglycerate dehydrogenase                                | PHGDH        |
| Cells&Exosomes | sp    | O43707     | ACTN4_HUMAN      | Alpha-actinin-4                                                   | ACTN4        |
| Cells&Exosomes | sp    | O60361     | NDK8_HUMAN       | Putative nucleoside diphosphate kinase                            | NME2P1       |
| Cells&Exosomes | sp    | O60814     | H2B1K_HUMAN      | Histone H2B type 1-K                                              | H2BC12       |
| Cells&Exosomes | sp    | O75083     | WDR1_HUMAN       | WD repeat-containing protein 1                                    | WDR1         |
| Cells&Exosomes | sp    | O75369     | FLNB_HUMAN       | Filamin-B                                                         | FLNB         |
| Cells&Exosomes | sp    | O75874     | IDHC_HUMAN       | Isocitrate dehydrogenase [NADP] cytoplasmic                       | IDH1         |
| Cells&Exosomes | sp    | P00338     | LDHA_HUMAN       | L-lactate dehydrogenase A chain                                   | LDHA         |
| Cells&Exosomes | sp    | P00558     | PGK1_HUMAN       | Phosphoglycerate kinase 1                                         | PGK1         |
| Cells&Exosomes | sp    | P02787     | TRFE_HUMAN       | Serotransferrin                                                   | TF           |
| Cells&Exosomes | sp    | P02788     | TRFL_HUMAN       | Lactotransferrin                                                  | LTF          |
| Cells&Exosomes | sp    | P04075     | ALDOA_HUMAN      | Fructose-bisphosphate aldolase A                                  | ALDOA        |
| Cells&Exosomes | sp    | P04350     | TUBB4A_HUMAN     | Tubulin beta-4A chain                                             | TUBB4A       |
| Cells&Exosomes | sp    | P04406     | G3P_HUMAN        | Glyceraldehyde-3-phosphate dehydrogenase                          | GAPDH        |
| Cells&Exosomes | sp    | P04908     | H2A1B_HUMAN      | Histone H2A type 1-B/E                                            | H2AC8        |
| Cells&Exosomes | sp    | P06396     | GELS_HUMAN       | Gelsolin                                                          | GSN          |
| Cells&Exosomes | sp    | P06733     | ENOA_HUMAN       | Alpha-enolase                                                     | ENO1         |
| Cells&Exosomes | sp    | P06737     | PYGL_HUMAN       | Glycogen phosphorylase, liver form                                | PYGL         |
| Cells&Exosomes | sp    | P06744     | G6PI_HUMAN       | Glucose-6-phosphate isomerase                                     | GPI          |
| Cells&Exosomes | sp    | P06748     | NPM_HUMAN        | Nucleophosmin                                                     | NPM1         |

Supplementary Table 2.xlsx

| Cluster        | class | UNIPROT | UNIPROT_ID  | Description                                     | GN       |
|----------------|-------|---------|-------------|-------------------------------------------------|----------|
| Cells&Exosomes | sp    | P06899  | H2B1J_HUMAN | Histone H2B type 1-J                            | H2BC11   |
| Cells&Exosomes | sp    | P07195  | LDHB_HUMAN  | L-lactate dehydrogenase B chain                 | LDHB     |
| Cells&Exosomes | sp    | P07339  | CATD_HUMAN  | Cathepsin D                                     | CTSD     |
| Cells&Exosomes | sp    | P07355  | ANXA2_HUMAN | Annexin A2                                      | ANXA2    |
| Cells&Exosomes | sp    | P07437  | TBB5_HUMAN  | Tubulin beta chain                              | TUBB     |
| Cells&Exosomes | sp    | P07737  | PROF1_HUMAN | Profilin-1                                      | PFN1     |
| Cells&Exosomes | sp    | P07900  | HS90A_HUMAN | Heat shock protein HSP 90-alpha                 | HSP90AA1 |
| Cells&Exosomes | sp    | P08238  | HS90B_HUMAN | Heat shock protein HSP 90-beta                  | HSP90AB1 |
| Cells&Exosomes | sp    | P08865  | RSSA_HUMAN  | 40S ribosomal protein SA                        | RPSA     |
| Cells&Exosomes | sp    | P09104  | ENOG_HUMAN  | Gamma-enolase                                   | ENO2     |
| Cells&Exosomes | sp    | P09211  | GSTP1_HUMAN | Glutathione S-transferase P                     | GSTP1    |
| Cells&Exosomes | sp    | P09972  | ALDOC_HUMAN | Fructose-bisphosphate aldolase C                | ALDOC    |
| Cells&Exosomes | sp    | P0C055  | H2AZ_HUMAN  | Histone H2A.Z                                   | H2AZ1    |
| Cells&Exosomes | sp    | P0C058  | H2A1_HUMAN  | Histone H2A type 1                              | H2AC16   |
| Cells&Exosomes | sp    | P0CG38  | POTEI_HUMAN | POTE ankyrin domain family member I             | POTEI    |
| Cells&Exosomes | sp    | P0CG39  | POTEJ_HUMAN | POTE ankyrin domain family member J             | POTEJ    |
| Cells&Exosomes | sp    | P0CG47  | UBB_HUMAN   | Polyubiquitin-B                                 | UBB      |
| Cells&Exosomes | sp    | P0CG48  | UBC_HUMAN   | Polyubiquitin-C                                 | UBC      |
| Cells&Exosomes | sp    | P0DMV8  | HS71A_HUMAN | Heat shock 70 kDa protein 1A                    | HSPA1A   |
| Cells&Exosomes | sp    | P0DMV9  | HS71B_HUMAN | Heat shock 70 kDa protein 1B                    | HSPA1B   |
| Cells&Exosomes | sp    | P0DPH7  | TBA3C_HUMAN | Tubulin alpha-3C chain                          | TUBA3C   |
| Cells&Exosomes | sp    | P0DPH8  | TBA3D_HUMAN | Tubulin alpha-3D chain                          | TUBA3D   |
| Cells&Exosomes | sp    | P11021  | BIP_HUMAN   | Endoplasmic reticulum chaperone BiP             | HSPA5    |
| Cells&Exosomes | sp    | P11142  | HSP7C_HUMAN | Heat shock cognate 71 kDa protein               | HSPA8    |
| Cells&Exosomes | sp    | P11216  | PYGB_HUMAN  | Glycogen phosphorylase, brain form              | PYGB     |
| Cells&Exosomes | sp    | P11717  | MPRI_HUMAN  | Cation-independent mannose-6-phosphate receptor | IGF2R    |
| Cells&Exosomes | sp    | P12814  | ACTN1_HUMAN | Alpha-actinin-1                                 | ACTN1    |
| Cells&Exosomes | sp    | P12955  | PEPD_HUMAN  | Xaa-Pro dipeptidase                             | PEPD     |
| Cells&Exosomes | sp    | P13639  | EF2_HUMAN   | Elongation factor 2                             | EEF2     |
| Cells&Exosomes | sp    | P13929  | ENOB_HUMAN  | Beta-enolase                                    | ENO3     |
| Cells&Exosomes | sp    | P14174  | MIF_HUMAN   | Macrophage migration inhibitory factor          | MIF      |
| Cells&Exosomes | sp    | P14550  | AK1A1_HUMAN | Aldo-keto reductase family 1 member A1          | AKR1A1   |
| Cells&Exosomes | sp    | P14618  | KPYM_HUMAN  | Pyruvate kinase PKM                             | PKM      |
| Cells&Exosomes | sp    | P14625  | ENPL_HUMAN  | Endoplasmic                                     | HSP90B1  |
| Cells&Exosomes | sp    | P15121  | ALDR_HUMAN  | Aldo-keto reductase family 1 member B1          | AKR1B1   |
| Cells&Exosomes | sp    | P15259  | PGAM2_HUMAN | Phosphoglycerate mutase 2                       | PGAM2    |
| Cells&Exosomes | sp    | P15311  | EZR1_HUMAN  | Ezrin                                           | EZR      |
| Cells&Exosomes | sp    | P15531  | NDKA_HUMAN  | Nucleoside diphosphate kinase A                 | NME1     |
| Cells&Exosomes | sp    | P16104  | H2AX_HUMAN  | Histone H2AX                                    | H2AX     |
| Cells&Exosomes | sp    | P16401  | H15_HUMAN   | Histone H1.5                                    | H1-5     |
| Cells&Exosomes | sp    | P17066  | HSP76_HUMAN | Heat shock 70 kDa protein 6                     | HSPA6    |
| Cells&Exosomes | sp    | P18206  | VINC_HUMAN  | Vinculin                                        | VCL      |
| Cells&Exosomes | sp    | P18669  | PGAM1_HUMAN | Phosphoglycerate mutase 1                       | PGAM1    |
| Cells&Exosomes | sp    | P20671  | H2A1D_HUMAN | Histone H2A type 1-D                            | H2AC7    |
| Cells&Exosomes | sp    | P21333  | FLNA_HUMAN  | Filamin-A                                       | FLNA     |
| Cells&Exosomes | sp    | P22314  | UBA1_HUMAN  | Ubiquitin-like modifier-activating enzyme 1     | UBA1     |
| Cells&Exosomes | sp    | P22392  | NDKB_HUMAN  | Nucleoside diphosphate kinase B                 | NME2     |
| Cells&Exosomes | sp    | P23526  | SAHH_HUMAN  | Adenosylhomocysteinase                          | AHCY     |
| Cells&Exosomes | sp    | P23527  | H2B1O_HUMAN | Histone H2B type 1-O                            | H2BC17   |
| Cells&Exosomes | sp    | P23528  | COF1_HUMAN  | Cofilin-1                                       | CFL1     |
| Cells&Exosomes | sp    | P25787  | PSA2_HUMAN  | Proteasome subunit alpha type-2                 | PSMA2    |
| Cells&Exosomes | sp    | P25788  | PSA3_HUMAN  | Proteasome subunit alpha type-3                 | PSMA3    |
| Cells&Exosomes | sp    | P25789  | PSA4_HUMAN  | Proteasome subunit alpha type-4                 | PSMA4    |
| Cells&Exosomes | sp    | P26038  | MOES_HUMAN  | Moesin                                          | MSN      |
| Cells&Exosomes | sp    | P26641  | EF1G_HUMAN  | Elongation factor 1-gamma                       | EEF1G    |
| Cells&Exosomes | sp    | P27348  | 1433T_HUMAN | 14-3-3 protein theta                            | YWHAQ    |
| Cells&Exosomes | sp    | P28066  | PSA5_HUMAN  | Proteasome subunit alpha type-5                 | PSMA5    |
| Cells&Exosomes | sp    | P28070  | PSB4_HUMAN  | Proteasome subunit beta type-4                  | PSMB4    |
| Cells&Exosomes | sp    | P28072  | PSB6_HUMAN  | Proteasome subunit beta type-6                  | PSMB6    |
| Cells&Exosomes | sp    | P29401  | TKT_HUMAN   | Transketolase                                   | TKT      |
| Cells&Exosomes | sp    | P30086  | PEBP1_HUMAN | Phosphatidylethanolamine-binding protein 1      | PEBP1    |
| Cells&Exosomes | sp    | P30613  | KPYR_HUMAN  | Pyruvate kinase PKLR                            | PKLR     |
| Cells&Exosomes | sp    | P31150  | GDIA_HUMAN  | Rab GDP dissociation inhibitor alpha            | GD11     |
| Cells&Exosomes | sp    | P31946  | 1433B_HUMAN | 14-3-3 protein beta/alpha                       | YWHA8    |
| Cells&Exosomes | sp    | P32119  | PRDX2_HUMAN | Peroxiredoxin-2                                 | PRDX2    |
| Cells&Exosomes | sp    | P33778  | H2B1B_HUMAN | Histone H2B type 1-B                            | H2BC3    |
| Cells&Exosomes | sp    | P34931  | HS71L_HUMAN | Heat shock 70 kDa protein 1-like                | HSPA1L   |
| Cells&Exosomes | sp    | P35241  | RADI_HUMAN  | Radixin                                         | RDX      |
| Cells&Exosomes | sp    | P35579  | MYH9_HUMAN  | Myosin-9                                        | MYH9     |
| Cells&Exosomes | sp    | P35609  | ACTN2_HUMAN | Alpha-actinin-2                                 | ACTN2    |
| Cells&Exosomes | sp    | P37802  | TAGL2_HUMAN | Transgelin-2                                    | TAGLN2   |
| Cells&Exosomes | sp    | P40123  | CAP2_HUMAN  | Adenylyl cyclase-associated protein 2           | CAP2     |
| Cells&Exosomes | sp    | P41250  | GARS_HUMAN  | Glycine-tRNA ligase                             | GARS1    |
| Cells&Exosomes | sp    | P48741  | HSP77_HUMAN | Putative heat shock 70 kDa protein 7            | HSPA7    |
| Cells&Exosomes | sp    | P49327  | FAS_HUMAN   | Fatty acid synthase                             | FASN     |
| Cells&Exosomes | sp    | P50395  | GDIB_HUMAN  | Rab GDP dissociation inhibitor beta             | GD12     |
| Cells&Exosomes | sp    | P54652  | HSP72_HUMAN | Heat shock-related 70 kDa protein 2             | HSPA2    |
| Cells&Exosomes | sp    | P55072  | TERA_HUMAN  | Transitional endoplasmic reticulum ATPase       | VCP      |
| Cells&Exosomes | sp    | P55209  | NP111_HUMAN | Nucleosome assembly protein 1-like 1            | NAP111   |
| Cells&Exosomes | sp    | P57053  | H2BFS_HUMAN | Histone H2B type F-5                            | H2BS1    |
| Cells&Exosomes | sp    | P58876  | H2B1D_HUMAN | Histone H2B type 1-D                            | H2BC5    |
| Cells&Exosomes | sp    | P60174  | TPI5_HUMAN  | Triosephosphate isomerase                       | TPI1     |
| Cells&Exosomes | sp    | P60709  | ACTB_HUMAN  | Actin, cytoplasmic 1                            | ACTB     |
| Cells&Exosomes | sp    | P60842  | IF4A1_HUMAN | Eukaryotic initiation factor 4A-1               | EIF4A1   |
| Cells&Exosomes | sp    | P60900  | PSA6_HUMAN  | Proteasome subunit alpha type-6                 | PSMA6    |
| Cells&Exosomes | sp    | P61224  | RAP1B_HUMAN | Ras-related protein Rap-1b                      | RAP1B    |
| Cells&Exosomes | sp    | P61981  | 1433G_HUMAN | 14-3-3 protein gamma                            | YWHA6    |
| Cells&Exosomes | sp    | P62258  | 1433E_HUMAN | 14-3-3 protein epsilon                          | YWHA6    |
| Cells&Exosomes | sp    | P62736  | ACTA_HUMAN  | Actin, aortic smooth muscle                     | ACTA2    |
| Cells&Exosomes | sp    | P62805  | H4_HUMAN    | Histone H4                                      | H4C8     |



Supplementary Table 2.xlsx

| Cluster        | class | UNIPROT | UNIPROT_ID   | Description                                 | GN        |
|----------------|-------|---------|--------------|---------------------------------------------|-----------|
| Cells&Exosomes | sp    | P62807  | H2B1C_HUMAN  | Histone H2B type 1-C/E/F/G/I                | H2BC4     |
| Cells&Exosomes | sp    | P62826  | RAN_HUMAN    | GTP-binding nuclear protein Ran             | RAN       |
| Cells&Exosomes | sp    | P62834  | RAP1A_HUMAN  | Ras-related protein Rap-1A                  | RAP1A     |
| Cells&Exosomes | sp    | P62937  | PPIA_HUMAN   | Peptidyl-prolyl cis-trans isomerase A       | PPIA      |
| Cells&Exosomes | sp    | P62979  | RS27A_HUMAN  | Ubiquitin-40S ribosomal protein S27a        | RPS27A    |
| Cells&Exosomes | sp    | P62987  | RL40_HUMAN   | Ubiquitin-60S ribosomal protein L40         | UBA52     |
| Cells&Exosomes | sp    | P63104  | I433Z_HUMAN  | 14-3-3 protein zeta/delta                   | YWHAZ     |
| Cells&Exosomes | sp    | P63261  | ACTG_HUMAN   | Actin, cytoplasmic 2                        | ACTG1     |
| Cells&Exosomes | sp    | P63267  | ACTH_HUMAN   | Actin, gamma-enteric smooth muscle          | ACTG2     |
| Cells&Exosomes | sp    | P68032  | ACTC_HUMAN   | Actin, alpha cardiac muscle 1               | ACTC1     |
| Cells&Exosomes | sp    | P68104  | EF1A1_HUMAN  | Elongation factor 1-alpha 1                 | EF1A1     |
| Cells&Exosomes | sp    | P68133  | ACTS_HUMAN   | Actin, alpha skeletal muscle                | ACTA1     |
| Cells&Exosomes | sp    | P68363  | TBA1B_HUMAN  | Tubulin alpha-1B chain                      | TUBA1B    |
| Cells&Exosomes | sp    | P68366  | TBA4A_HUMAN  | Tubulin alpha-4A chain                      | TUBA4A    |
| Cells&Exosomes | sp    | P68371  | TBB4B_HUMAN  | Tubulin beta-4B chain                       | TUBB4B    |
| Cells&Exosomes | sp    | P69905  | HBA_HUMAN    | Hemoglobin subunit alpha                    | HBA2      |
| Cells&Exosomes | sp    | P78371  | TCPB_HUMAN   | T-complex protein 1 subunit beta            | CCT2      |
| Cells&Exosomes | sp    | Q00610  | CLH1_HUMAN   | Clathrin heavy chain 1                      | CLTC      |
| Cells&Exosomes | sp    | Q01518  | CAP1_HUMAN   | Adenylyl cyclase-associated protein 1       | CAP1      |
| Cells&Exosomes | sp    | Q05639  | EF1A2_HUMAN  | Elongation factor 1-alpha 2                 | EF1A2     |
| Cells&Exosomes | sp    | Q06830  | PRDX1_HUMAN  | Peroxisiredoxin-1                           | PRDX1     |
| Cells&Exosomes | sp    | Q08380  | LG3BP_HUMAN  | Galectin-3-binding protein                  | LGALS3BP  |
| Cells&Exosomes | sp    | Q12931  | TRAP1_HUMAN  | Heat shock protein 75 kDa, mitochondrial    | TRAP1     |
| Cells&Exosomes | sp    | Q13509  | TBB3_HUMAN   | Tubulin beta-3 chain                        | TUBB3     |
| Cells&Exosomes | sp    | Q13885  | TBB2A_HUMAN  | Tubulin beta-2A chain                       | TUBB2A    |
| Cells&Exosomes | sp    | Q14019  | COTL1_HUMAN  | Coactosin-like protein                      | COTL1     |
| Cells&Exosomes | sp    | Q14240  | IF4A2_HUMAN  | Eukaryotic initiation factor 4A-II          | EIF4A2    |
| Cells&Exosomes | sp    | Q14315  | FLNC_HUMAN   | Filamin-C                                   | FLNC      |
| Cells&Exosomes | sp    | Q14568  | HS902_HUMAN  | Heat shock protein HSP 90-alpha A2          | HSP90AA2P |
| Cells&Exosomes | sp    | Q14974  | IMB1_HUMAN   | Importin subunit beta-1                     | KPNB1     |
| Cells&Exosomes | sp    | Q16777  | H2A2C_HUMAN  | Histone H2A type 2-C                        | H2AC20    |
| Cells&Exosomes | sp    | Q16778  | H2B2E_HUMAN  | Histone H2B type 2-E                        | H2BC21    |
| Cells&Exosomes | sp    | Q3ZCM7  | TBB8_HUMAN   | Tubulin beta-8 chain                        | TUBB8     |
| Cells&Exosomes | sp    | Q562R1  | ACTBL_HUMAN  | Beta-actin-like protein 2                   | ACTBL2    |
| Cells&Exosomes | sp    | Q58FF6  | H90B4_HUMAN  | Putative heat shock protein HSP 90-beta 4   | HSP90AB4P |
| Cells&Exosomes | sp    | Q58FF7  | H90B3_HUMAN  | Putative heat shock protein HSP 90-beta-3   | HSP90AB3P |
| Cells&Exosomes | sp    | Q58FF8  | H90B2_HUMAN  | Putative heat shock protein HSP 90-beta 2   | HSP90AB2P |
| Cells&Exosomes | sp    | Q58FG1  | HS904_HUMAN  | Putative heat shock protein HSP 90-alpha A4 | HSP90AA4P |
| Cells&Exosomes | sp    | Q5QNW6  | H2B2F_HUMAN  | Histone H2B type 2-F                        | H2BC18    |
| Cells&Exosomes | sp    | Q5VTE0  | EF1A3_HUMAN  | Putative elongation factor 1-alpha-like 3   | EF1A1P5   |
| Cells&Exosomes | sp    | Q6DN03  | H2B2C_HUMAN  | Putative histone H2B type 2-C               | H2BC20P   |
| Cells&Exosomes | sp    | Q6DRA6  | H2B2D_HUMAN  | Putative histone H2B type 2-D               | H2BC19P   |
| Cells&Exosomes | sp    | Q6F113  | H2A2A_HUMAN  | Histone H2A type 2-A                        | H2AC19    |
| Cells&Exosomes | sp    | Q6PEY2  | TBA3E_HUMAN  | Tubulin alpha-3E chain                      | TUBA3E    |
| Cells&Exosomes | sp    | Q6S8J3  | POTEE_HUMAN  | POTE ankyrin domain family member E         | POTEE     |
| Cells&Exosomes | sp    | Q6YHK3  | CD109_HUMAN  | CD109 antigen                               | CD109     |
| Cells&Exosomes | sp    | Q71U36  | TBA1A_HUMAN  | Tubulin alpha-1A chain                      | TUBA1A    |
| Cells&Exosomes | sp    | Q71U19  | H2AV_HUMAN   | Histone H2A.V                               | H2AZ2     |
| Cells&Exosomes | sp    | Q7L7L0  | H2A3_HUMAN   | Histone H2A type 3                          | H2AW      |
| Cells&Exosomes | sp    | Q81UE6  | H2A2B_HUMAN  | Histone H2A type 2-B                        | H2AC21    |
| Cells&Exosomes | sp    | Q8N0Y7  | PGAM4_HUMAN  | Probable phosphoglycerate mutase 4          | PGAM4     |
| Cells&Exosomes | sp    | Q8N257  | H2B3B_HUMAN  | Histone H2B type 3-B                        | H2BU1     |
| Cells&Exosomes | sp    | Q8TAA3  | PSMA8_HUMAN  | Proteasome subunit alpha-type 8             | PSMA8     |
| Cells&Exosomes | sp    | Q92820  | GGH_HUMAN    | Gamma-glutamyl hydrolase                    | GGH       |
| Cells&Exosomes | sp    | Q93077  | H2A1C_HUMAN  | Histone H2A type 1-C                        | H2AC6     |
| Cells&Exosomes | sp    | Q93079  | H2B1H_HUMAN  | Histone H2B type 1-H                        | H2BC9     |
| Cells&Exosomes | sp    | Q96A08  | H2B1A_HUMAN  | Histone H2B type 1-A                        | H2BC1     |
| Cells&Exosomes | sp    | Q96K65  | H2A1H_HUMAN  | Histone H2A type 1-H                        | H2AC12    |
| Cells&Exosomes | sp    | Q96QV6  | H2A1A_HUMAN  | Histone H2A type 1-A                        | H2AC1     |
| Cells&Exosomes | sp    | Q99877  | H2B1N_HUMAN  | Histone H2B type 1-N                        | H2BC15    |
| Cells&Exosomes | sp    | Q99878  | H2A1J_HUMAN  | Histone H2A type 1-J                        | H2AC14    |
| Cells&Exosomes | sp    | Q99879  | H2B1M_HUMAN  | Histone H2B type 1-M                        | H2BC14    |
| Cells&Exosomes | sp    | Q99880  | H2B1L_HUMAN  | Histone H2B type 1-L                        | H2BC13    |
| Cells&Exosomes | sp    | Q9BQE3  | TBA1C_HUMAN  | Tubulin alpha-1C chain                      | TUBA1C    |
| Cells&Exosomes | sp    | Q9BTM1  | H2AJ_HUMAN   | Histone H2A.J                               | H2AJ      |
| Cells&Exosomes | sp    | Q9BUF5  | TBB6_HUMAN   | Tubulin beta-6 chain                        | TUBB6     |
| Cells&Exosomes | sp    | Q9BVA1  | TBB2B_HUMAN  | Tubulin beta-2B chain                       | TUBB2B    |
| Cells&Exosomes | sp    | Q9BYX7  | ACTBM_HUMAN  | Putative beta-actin-like protein 3          | POTEK3P   |
| Cells&Exosomes | sp    | Q9H4B7  | TBB1_HUMAN   | Tubulin beta-1 chain                        | TUBB1     |
| Cells&Exosomes | sp    | Q9H853  | TBA4B_HUMAN  | Putative tubulin-like protein alpha-4B      | TUBA4B    |
| Cells&Exosomes | sp    | Q9NY65  | TBA8_HUMAN   | Tubulin alpha-8 chain                       | TUBA8     |
| Cells&Exosomes | sp    | Q9Y281  | COF2_HUMAN   | Cofilin-2                                   | CFL2      |
| Cells&Exosomes | sp    | Q9Y490  | TLN1_HUMAN   | Talin-1                                     | TLN1      |
| Exosomes       | sp    | Q00391  | QSOX1_HUMAN  | Sulphydryl oxidase 1                        | QSOX1     |
| Exosomes       | sp    | Q00468  | AGRIN_HUMAN  | Agrin                                       | AGRIN     |
| Exosomes       | sp    | Q15230  | LAMA5_HUMAN  | Laminin subunit alpha-5                     | LAMA5     |
| Exosomes       | sp    | Q95084  | PRSS23_HUMAN | Serine protease 23                          | PRSS23    |
| Exosomes       | sp    | Q95497  | VNN1_HUMAN   | Pantetheinase                               | VNN1      |
| Exosomes       | sp    | Q95498  | VNN2_HUMAN   | Vascular non-inflammatory molecule 2        | VNN2      |
| Exosomes       | sp    | P00450  | CERU_HUMAN   | Ceruloplasmin                               | CP        |
| Exosomes       | sp    | P00488  | F13A_HUMAN   | Coagulation factor XIII A chain             | F13A1     |
| Exosomes       | sp    | P00734  | THRB_HUMAN   | Prothrombin                                 | F2        |
| Exosomes       | sp    | P00742  | FA10_HUMAN   | Coagulation factor X                        | F10       |
| Exosomes       | sp    | P00966  | ASSY_HUMAN   | Argininosuccinate synthase                  | ASS1      |
| Exosomes       | sp    | P01008  | ANT3_HUMAN   | Antithrombin-III                            | SERPINC1  |
| Exosomes       | sp    | P01023  | A2MG_HUMAN   | Alpha-2-macroglobulin                       | A2M       |
| Exosomes       | sp    | P01024  | CO3_HUMAN    | Complement C3                               | C3        |
| Exosomes       | sp    | P01031  | CO5_HUMAN    | Complement C5                               | C5        |
| Exosomes       | sp    | P02008  | HBAZ_HUMAN   | Hemoglobin subunit zeta                     | HBZ       |
| Exosomes       | sp    | P02042  | HBD_HUMAN    | Hemoglobin subunit delta                    | HBD       |

Supplementary Table 2.xlsx

| Cluster     | class | UNIPROT    | UNIPROT_ID       | Description                                                          | GN              |
|-------------|-------|------------|------------------|----------------------------------------------------------------------|-----------------|
| Exosomes    | sp    | P02100     | HBE_HUMAN        | Hemoglobin subunit epsilon                                           | HBE1            |
| Exosomes    | sp    | P02452     | CO1A1_HUMAN      | Collagen alpha-1(I) chain                                            | COL1A1          |
| Exosomes    | sp    | P02458     | CO2A1_HUMAN      | Collagen alpha-1(II) chain                                           | COL2A1          |
| Exosomes    | sp    | P02461     | CO3A1_HUMAN      | Collagen alpha-1(III) chain                                          | COL3A1          |
| Exosomes    | sp    | P02647     | APOA1_HUMAN      | Apolipoprotein A-I                                                   | APOA1           |
| Exosomes    | sp    | P02649     | APOE_HUMAN       | Apolipoprotein E                                                     | APOE            |
| Exosomes    | sp    | P02656     | APOC3_HUMAN      | Apolipoprotein C-III                                                 | APOC3           |
| Exosomes    | sp    | P02675     | FIBB_HUMAN       | Fibrinogen beta chain                                                | FGB             |
| Exosomes    | sp    | P02748     | CO9_HUMAN        | Complement component C9                                              | C9              |
| Exosomes    | sp    | P02749     | APOH_HUMAN       | Beta-2-glycoprotein 1                                                | APOH            |
| Exosomes    | sp    | P02751     | FINC_HUMAN       | Fibronectin                                                          | FN1             |
| Exosomes    | sp    | P02753     | RET4_HUMAN       | Retinol-binding protein 4                                            | RBP4            |
| Exosomes    | sp    | P02771     | FETA_HUMAN       | Alpha-fetoprotein                                                    | AFP             |
| Exosomes    | sp    | P04004     | VTNC_HUMAN       | Vitronectin                                                          | VTN             |
| Exosomes    | sp    | P04114     | APOB_HUMAN       | Apolipoprotein B-100                                                 | APOB            |
| Exosomes    | sp    | P04180     | LCAT_HUMAN       | Phosphatidylcholine-sterol acyltransferase                           | LCAT            |
| Exosomes    | sp    | P04278     | SHBG_HUMAN       | Sex hormone-binding globulin                                         | SHBG            |
| Exosomes    | sp    | P04745     | AMY1_HUMAN       | Alpha-amylase 1                                                      | AMY1A           |
| Exosomes    | sp    | P04746     | AMYP_HUMAN       | Pancreatic alpha-amylase                                             | AMY2A           |
| Exosomes    | sp    | P05121     | PAI1_HUMAN       | Plasminogen activator inhibitor 1                                    | SERPINE1        |
| Exosomes    | sp    | P05155     | IC1_HUMAN        | Plasma protease C1 inhibitor                                         | SERPINC1        |
| Exosomes    | sp    | P05452     | TETN_HUMAN       | Tetranectin                                                          | CLEC3B          |
| Exosomes    | sp    | P05543     | THBG_HUMAN       | Thyroxine-binding globulin                                           | SERPINA7        |
| Exosomes    | sp    | P05546     | HEP2_HUMAN       | Heparin cofactor 2                                                   | SERPIND1        |
| Exosomes    | sp    | P07942     | LAMB1_HUMAN      | Laminin subunit beta-1                                               | LAMB1           |
| Exosomes    | sp    | P07996     | TSP1_HUMAN       | Thrombospondin-1                                                     | THBS1           |
| Exosomes    | sp    | P08123     | CO1A2_HUMAN      | Collagen alpha-2(I) chain                                            | COL1A2          |
| Exosomes    | sp    | P08263     | GSTA1_HUMAN      | Glutathione S-transferase A1                                         | GSTA1           |
| Exosomes    | sp    | P08697     | A2AP_HUMAN       | Alpha-2-antiplasmin                                                  | SERPINF2        |
| Exosomes    | sp    | P09210     | GSTA2_HUMAN      | Glutathione S-transferase A2                                         | GSTA2           |
| Exosomes    | sp    | P0C0L4     | CO4A_HUMAN       | Complement C4-A                                                      | C4A             |
| Exosomes    | sp    | P0C0L5     | CO4B_HUMAN       | Complement C4-B                                                      | C4B_2           |
| Exosomes    | sp    | P10643     | CO7_HUMAN        | Complement component C7                                              | C7              |
| Exosomes    | sp    | P10909     | CLUS_HUMAN       | Clusterin                                                            | CLU             |
| Exosomes    | sp    | P11047     | LAMC1_HUMAN      | Laminin subunit gamma-1                                              | LAMC1           |
| Exosomes    | sp    | P12109     | CO6A1_HUMAN      | Collagen alpha-1(VI) chain                                           | COL6A1          |
| Exosomes    | sp    | P12111     | CO6A3_HUMAN      | Collagen alpha-3(VI) chain                                           | COL6A3          |
| Exosomes    | sp    | P12259     | FA5_HUMAN        | Coagulation factor V                                                 | F5              |
| Exosomes    | sp    | P15169     | CBPN_HUMAN       | Carboxypeptidase N catalytic chain                                   | CPN1            |
| Exosomes    | sp    | P18065     | IBP2_HUMAN       | Insulin-like growth factor-binding protein 2                         | IGFBP2          |
| Exosomes    | sp    | P19823     | ITIH2_HUMAN      | Inter-alpha-trypsin inhibitor heavy chain H2                         | ITIH2           |
| Exosomes    | sp    | P19827     | ITIH1_HUMAN      | Inter-alpha-trypsin inhibitor heavy chain H1                         | ITIH1           |
| Exosomes    | sp    | P19961     | AMY2B_HUMAN      | Alpha-amylase 2B                                                     | AMY2B           |
| Exosomes    | sp    | P20742     | PZP_HUMAN        | Pregnancy zone protein                                               | PZP             |
| Exosomes    | sp    | P20774     | MIME_HUMAN       | Mimecan                                                              | OGN             |
| Exosomes    | sp    | P20908     | COS1A1_HUMAN     | Collagen alpha-1(V) chain                                            | COL5A1          |
| Exosomes    | sp    | P22352     | GPX3_HUMAN       | Glutathione peroxidase 3                                             | GPX3            |
| Exosomes    | sp    | P23142     | FBLN1_HUMAN      | Fibulin-1                                                            | FBLN1           |
| Exosomes    | sp    | P24821     | TENA_HUMAN       | Tenascin                                                             | TNC             |
| Exosomes    | sp    | P32754     | HPPD_HUMAN       | 4-hydroxyphenylpyruvate dioxygenase                                  | HPD             |
| Exosomes    | sp    | P35442     | TSP2_HUMAN       | Thrombospondin-2                                                     | THBS2           |
| Exosomes    | sp    | P35443     | TSP4_HUMAN       | Thrombospondin-4                                                     | THBS4           |
| Exosomes    | sp    | P36955     | PEDF_HUMAN       | Pigment epithelium-derived factor                                    | SERPINF1        |
| Exosomes    | sp    | P49746     | TSP3_HUMAN       | Thrombospondin-3                                                     | THBS3           |
| Exosomes    | sp    | P49747     | COMP_HUMAN       | Cartilage oligomeric matrix protein                                  | COMP            |
| Exosomes    | sp    | P51570     | GALK1_HUMAN      | Galactokinase                                                        | GALK1           |
| Exosomes    | sp    | P51884     | LUM_HUMAN        | Lumican                                                              | LUM             |
| Exosomes    | sp    | P55058     | PLTP_HUMAN       | Phospholipid transfer protein                                        | PLTP            |
| Exosomes    | sp    | P68871     | HBB_HUMAN        | Hemoglobin subunit beta                                              | HBB             |
| Exosomes    | sp    | P69891     | HBG1_HUMAN       | Hemoglobin subunit gamma-1                                           | HBG1            |
| Exosomes    | sp    | P69892     | HBG2_HUMAN       | Hemoglobin subunit gamma-2                                           | HBG2            |
| Exosomes    | sp    | P98160     | PGBM_HUMAN       | Basement membrane-specific heparan sulfate proteoglycan core protein | HSPG2           |
| Exosomes    | sp    | Q04756     | HGFA_HUMAN       | Hepatocyte growth factor activator                                   | HGFAC           |
| Exosomes    | sp    | Q06033     | ITIH3_HUMAN      | Inter-alpha-trypsin inhibitor heavy chain H3                         | ITIH3           |
| Exosomes    | sp    | Q06828     | FMOD_HUMAN       | Fibromodulin                                                         | FMOD            |
| Exosomes    | sp    | Q07954     | LRP1_HUMAN       | Prolow-density lipoprotein receptor-related protein 1                | LRP1            |
| Exosomes    | sp    | Q12860     | CNTN1_HUMAN      | Contactin-1                                                          | CNTN1           |
| Exosomes    | sp    | Q14112     | NID2_HUMAN       | Nidogen-2                                                            | NID2            |
| Exosomes    | sp    | Q14624     | ITIH4_HUMAN      | Inter-alpha-trypsin inhibitor heavy chain H4                         | ITIH4           |
| Exosomes    | sp    | Q15063     | POSTN_HUMAN      | Periostin                                                            | POSTN           |
| Exosomes    | sp    | Q15493     | RGN_HUMAN        | Regucalcin                                                           | RGN             |
| Exosomes    | sp    | Q15582     | BGH3_HUMAN       | Transforming growth factor-beta-induced protein ig-h3                | TGFB1           |
| Exosomes    | sp    | Q16772     | GSTA3_HUMAN      | Glutathione S-transferase A3                                         | GSTA3           |
| Exosomes    | sp    | Q16853     | AOC3_HUMAN       | Membrane primary amine oxidase                                       | AOC3            |
| Exosomes    | sp    | Q76LX8     | ATS13_HUMAN      | A disintegrin and metalloproteinase with thrombospondin motifs 13    | ADAMTS13        |
| Exosomes    | sp    | Q86UX7     | URP2_HUMAN       | Fermitin family homolog 3                                            | FERMT3          |
| Exosomes    | sp    | Q93088     | BHMT1_HUMAN      | Betaine-homocysteine S-methyltransferase 1                           | BHMT            |
| Exosomes    | sp    | Q97115     | COCA1_HUMAN      | Collagen alpha-1(XII) chain                                          | COL12A1         |
| Exosomes    | sp    | Q98X14     | C1QT3_HUMAN      | Complement C1q tumor necrosis factor-related protein 3               | C1QTNF3         |
| Exosomes    | sp    | Q9GZM7     | TINAL_HUMAN      | Tubulointerstitial nephritis antigen-like                            | TINAGL1         |
| Exosomes    | sp    | Q9H2M3     | BHMT2_HUMAN      | S-methylmethionine-homocysteine S-methyltransferase BHMT2            | BHMT2           |
| Exosomes    | sp    | Q9UK55     | ZPI_HUMAN        | Protein Z-dependent protease inhibitor                               | SERPINA10       |
| Exosomes    | sp    | Q9Y240     | CLC11_HUMAN      | C-type lectin domain family 11 member A                              | CLEC11A         |
| Exosomes    | sp    | Q9Y4G6     | TLN2_HUMAN       | Talin-2                                                              | TLN2            |
| Not defined | tr    | A0A024R1R8 | A0A024R1R8_HUMAN | HCG2014768, isoform CRA_a                                            | ENSG00000225528 |
| Not defined | sp    | A0A024RBG1 | NUD4B_HUMAN      | Diphosphoinositol polyphosphate phosphohydrolase NUDT4B              | NUDT4B          |
| Not defined | sp    | A0A075B6K4 | LV310_HUMAN      | Immunoglobulin lambda variable 3-10                                  | IGLV3-10        |
| Not defined | tr    | A0A087X1L8 | A0A087X1L8_HUMAN | Ig-like domain-containing protein                                    | LOC102723996    |
| Not defined | sp    | A0A096LP55 | QCR6L_HUMAN      | Cytochrome b-c1 complex subunit 6-like, mitochondrial                | UQCRHL          |
| Not defined | tr    | A0A084J2E5 | A0A084J2E5_HUMAN | Uncharacterized protein                                              | LOC102724159    |

Supplementary Table 2.xlsx

| Cluster     | class | UNIPROT    | UNIPROT_ID       | Description                                                                      | GN              |
|-------------|-------|------------|------------------|----------------------------------------------------------------------------------|-----------------|
| Not defined | sp    | A0A0B412F0 | PIOS1_HUMAN      | Protein PIGBOS1                                                                  | PIGBOS1         |
| Not defined | sp    | A0A0C4DH25 | KVD20_HUMAN      | Immunoglobulin kappa variable 3D-20                                              | IGKV3D-20       |
| Not defined | sp    | A0A0C4DH68 | KV224_HUMAN      | Immunoglobulin kappa variable 2-24                                               | IGKV2-24        |
| Not defined | sp    | A0A0U1RR11 | CENL1_HUMAN      | Centromere protein V-like protein 1                                              | CENPVL1         |
| Not defined | sp    | A0A0U1RR16 | CENL3_HUMAN      | Centromere protein V-like protein 3                                              | CENPVL3         |
| Not defined | tr    | A0A140TA62 | A0A140TA62_HUMAN | IF rod domain-containing protein                                                 | ENSG00000262748 |
| Not defined | sp    | A0A180GTH6 | CS2IP_HUMAN      | Casein kinase II subunit alpha'-interacting protein                              | CSNKA2IP        |
| Not defined | sp    | A0A180GTS1 | H5FX4_HUMAN      | Heat shock transcription factor, X-linked member 4                               | H5FX4           |
| Not defined | tr    | A0A180GUL7 | A0A180GUL7_HUMAN | Protein kinase domain-containing protein                                         | ENSG00000230626 |
| Not defined | sp    | A0A180GUS4 | UB2L5_HUMAN      | Ubiquitin-conjugating enzyme E2 L5                                               | UBE2L5          |
| Not defined | sp    | A0A180GVQ3 | CC200_HUMAN      | Coiled-coil domain-containing protein 200                                        | CCDC200         |
| Not defined | sp    | A0A180GWH4 | H5FX3_HUMAN      | Heat shock transcription factor, X-linked member 3                               | H5FX3           |
| Not defined | tr    | A0A1W2PR95 | A0A1W2PR95_HUMAN | HCG1642624, isoform CRA_a                                                        | ENSG00000266826 |
| Not defined | tr    | A0A3B3IU46 | A0A3B3IU46_HUMAN | RNA guanine-7 methyltransferase-activating subunit-like (pseudogene)             | RAMACL          |
| Not defined | sp    | A0AV96     | RBM47_HUMAN      | RNA-binding protein 47                                                           | RBM47           |
| Not defined | sp    | A0AVI2     | FR1L5_HUMAN      | Fer-1-like protein 5                                                             | FER1L5          |
| Not defined | sp    | A0AVT1     | UBA6_HUMAN       | Ubiquitin-like modifier-activating enzyme 6                                      | UBA6            |
| Not defined | sp    | A0FGR8     | ESYT2_HUMAN      | Extended synaptotagmin-2                                                         | ESYT2           |
| Not defined | sp    | A0JLT2     | MED19_HUMAN      | Mediator of RNA polymerase II transcription subunit 19                           | MED19           |
| Not defined | sp    | A0MZ66     | SHOT1_HUMAN      | Shootin-1                                                                        | SHTN1           |
| Not defined | sp    | A0PK00     | T120B_HUMAN      | Transmembrane protein 120B                                                       | TMEM120B        |
| Not defined | sp    | A0PK11     | CLRN2_HUMAN      | Clarin-2                                                                         | CLRN2           |
| Not defined | sp    | A1L0T0     | HACL2_HUMAN      | 2-hydroxyacyl-CoA lyase 2                                                        | ILVBL           |
| Not defined | sp    | A1L162     | ERIC2_HUMAN      | Glutamate-rich protein 2                                                         | ERIC2           |
| Not defined | sp    | A1L429     | GG12C_HUMAN      | G antigen 12B/C/D/E                                                              | GAGE12C         |
| Not defined | sp    | A1L4H1     | SRCL_HUMAN       | Soluble scavenger receptor cysteine-rich domain-containing protein SSCSD         | SSCS5D          |
| Not defined | sp    | A1X283     | SPD2B_HUMAN      | SH3 and PX domain-containing protein 2B                                          | SH3PX2B         |
| Not defined | sp    | A2A368     | MAGBG_HUMAN      | Melanoma-associated antigen B16                                                  | MAGEB16         |
| Not defined | sp    | A2A3K4     | PTPC1_HUMAN      | Protein tyrosine phosphatase domain-containing protein 1                         | PTPDC1          |
| Not defined | sp    | A2A3N6     | PIPSL_HUMAN      | Putative PIP5K1A and PSMD4-like protein                                          | PIPSL           |
| Not defined | sp    | A2CJ06     | DYTN_HUMAN       | Dystrotelin                                                                      | DYTN            |
| Not defined | sp    | A2RTX5     | SYTC2_HUMAN      | Threonine-tRNA ligase 2, cytoplasmic                                             | TARS3           |
| Not defined | sp    | A2VDF0     | FUCM_HUMAN       | Fucose mutarotase                                                                | FUOM            |
| Not defined | sp    | A3KN83     | SBNO1_HUMAN      | Protein strawberry notch homolog 1                                               | SBNO1           |
| Not defined | sp    | A4D2B0     | MBLCL1_HUMAN     | Metallo-beta-lactamase domain-containing protein 1                               | MBLCL1          |
| Not defined | sp    | A4D2H0     | CTGEF_HUMAN      | cTAGE family member 15                                                           | CTAGE15         |
| Not defined | sp    | A5D8V6     | VP37C_HUMAN      | Vacuolar protein sorting-associated protein 37C                                  | VPS37C          |
| Not defined | sp    | A5D8W1     | CFA69_HUMAN      | Cilia- and flagella-associated protein 69                                        | CFAP69          |
| Not defined | sp    | A5PLL7     | TM189_HUMAN      | Plasmanylethanolamine desaturase                                                 | TMEM189         |
| Not defined | sp    | A5PLN9     | TPC13_HUMAN      | Trafficking protein particle complex subunit 13                                  | TRAPP13         |
| Not defined | sp    | A6NC98     | CC88B_HUMAN      | Coiled-coil domain-containing protein 88B                                        | CCDC88B         |
| Not defined | sp    | A6NCE7     | MP3B2_HUMAN      | Microtubule-associated proteins 1A/1B light chain 3 beta 2                       | MAP1LC3B2       |
| Not defined | sp    | A6NCM1     | IQCAL_HUMAN      | IQ and AAA domain-containing protein 1-like                                      | IQCAL1          |
| Not defined | sp    | A6NDB9     | PALM3_HUMAN      | Paralemmin-3                                                                     | PALM3           |
| Not defined | sp    | A6NDE8     | GG12H_HUMAN      | G antigen 12H                                                                    | GAGE12H         |
| Not defined | sp    | A6NDU8     | CE051_HUMAN      | UPF0600 protein C5orf51                                                          | C5orf51         |
| Not defined | sp    | A6NES5     | WDR97_HUMAN      | WD repeat-containing protein 97                                                  | WDR97           |
| Not defined | sp    | A6NEC2     | PSAL_HUMAN       | Puromycin-sensitive aminopeptidase-like protein                                  | NPEPPSL1        |
| Not defined | sp    | A6NER3     | GG12J_HUMAN      | G antigen 12J                                                                    | GAGE12J         |
| Not defined | sp    | A6NES4     | IMRO2A_HUMAN     | Maestro heat-like repeat-containing protein family member 2A                     | MROH2A          |
| Not defined | sp    | A6NFE2     | SMCO2_HUMAN      | Single-pass membrane and coiled-coil domain-containing protein 2                 | SMCO2           |
| Not defined | sp    | A6NFT4     | CFA73_HUMAN      | Cilia- and flagella-associated protein 73                                        | CFAP73          |
| Not defined | sp    | A6NGU5     | GGT3_HUMAN       | Putative glutathione hydrolase 3 proenzyme                                       | GGT3P           |
| Not defined | sp    | A6NHQ2     | FBLL1_HUMAN      | rRNA/tRNA 2'-O-methyltransferase fibrillar-like protein 1                        | FBLL1           |
| Not defined | sp    | A6NHR9     | SMHD1_HUMAN      | Structural maintenance of chromosomes flexible hinge domain-containing protein 1 | SMCHD1          |
| Not defined | sp    | A6NI73     | LIRAS_HUMAN      | Leukocyte immunoglobulin-like receptor subfamily A member 5                      | LIRAS           |
| Not defined | sp    | A6NKB5     | PCX2_HUMAN       | Pecanex-like protein 2                                                           | PCNX2           |
| Not defined | sp    | A6NM28     | ZFP92_HUMAN      | Zinc finger protein 92 homolog                                                   | ZFP92           |
| Not defined | sp    | A6NMX2     | I4E1B_HUMAN      | Eukaryotic translation initiation factor 4E type 1B                              | EIF4E1B         |
| Not defined | sp    | A6NMZ7     | CO6A6_HUMAN      | Collagen alpha-6(VI) chain                                                       | COL6A6          |
| Not defined | sp    | A6NNS2     | DRS7C_HUMAN      | Dehydrogenase/reductase SDR family member 7C                                     | DHR57C          |
| Not defined | sp    | A6NNY8     | UBP27_HUMAN      | Ubiquitin carboxyl-terminal hydrolase 27                                         | USP27X          |
| Not defined | sp    | A6PVI3     | NCB2L_HUMAN      | Nuclear cap-binding protein subunit 2-like                                       | NCBP2L          |
| Not defined | sp    | A7E2Y1     | MYH7B_HUMAN      | Myosin-7B                                                                        | MYH7B           |
| Not defined | sp    | A8K0Z3     | WASH1_HUMAN      | WASH complex subunit 1                                                           | WASHC1          |
| Not defined | sp    | A8MQ03     | CRTP1_HUMAN      | Cysteine-rich tail protein 1                                                     | CYSRT1          |
| Not defined | sp    | A8MT69     | CENPX_HUMAN      | Centromere protein X                                                             | CENPX           |
| Not defined | sp    | A8MTI9     | PRS47_HUMAN      | Putative serine protease 47                                                      | PRSS47          |
| Not defined | sp    | A8MIT3     | CEBOS_HUMAN      | Protein CEBPZOS                                                                  | CEBPZOS         |
| Not defined | sp    | A8MUU1     | FB5L3_HUMAN      | Putative fatty acid-binding protein 5-like protein 3                             | FABP5P3         |
| Not defined | sp    | A8MUV8     | ZN727_HUMAN      | Putative zinc finger protein 727                                                 | ZN727           |
| Not defined | sp    | A8MWA6     | F90AM_HUMAN      | Putative protein FAM90A22P                                                       | FAM90A22P       |
| Not defined | sp    | A8MWX3     | WASH4_HUMAN      | Putative WAS protein family homolog 4                                            | WASH4P          |
| Not defined | sp    | A8MXT2     | MAGBH_HUMAN      | Melanoma-associated antigen B17                                                  | MAGEB17         |
| Not defined | sp    | A8MXV4     | NUD19_HUMAN      | Nucleoside diphosphate-linked moiety X motif 19                                  | NUDT19          |
| Not defined | sp    | A8TX70     | CO6A5_HUMAN      | Collagen alpha-5(VI) chain                                                       | COL6A5          |
| Not defined | sp    | A9QM74     | IMA8_HUMAN       | Importin subunit alpha-8                                                         | KPN47           |
| Not defined | sp    | A9Z1Z3     | FR1L4_HUMAN      | Fer-1-like protein 4                                                             | FER1L4          |
| Not defined | sp    | B1AJZ9     | FHAD1_HUMAN      | Forkhead-associated domain-containing protein 1                                  | FHAD1           |
| Not defined | sp    | B2RTY4     | MYO9A_HUMAN      | Unconventional myosin-IXa                                                        | MYO9A           |
| Not defined | sp    | B2RUZ4     | SMIM1_HUMAN      | Small integral membrane protein 1                                                | SMIM1           |
| Not defined | sp    | B5MCN3     | S14L6_HUMAN      | Putative SEC14-like protein 6                                                    | SEC14L6         |
| Not defined | sp    | B5MCY1     | TDR15_HUMAN      | Tudor domain-containing protein 15                                               | TDRD15          |
| Not defined | sp    | B5MD39     | GGTL3_HUMAN      | Putative glutathione hydrolase light chain 3                                     | GGTL3C          |
| Not defined | sp    | B5ME19     | EIFCL_HUMAN      | Eukaryotic translation initiation factor 3 subunit C-like protein                | EIF3CL          |
| Not defined | sp    | B7U540     | KCNJ18_HUMAN     | Inward rectifier potassium channel 18                                            | KCNJ18          |
| Not defined | sp    | B7Z6K7     | ZN814_HUMAN      | Zinc finger protein 814                                                          | ZN814           |
| Not defined | tr    | B7ZLF3     | B7ZLF3_HUMAN     | Uncharacterized protein                                                          | LOC402624       |
| Not defined | sp    | B9A064     | IGLL5_HUMAN      | Immunoglobulin lambda-like polypeptide 5                                         | IGLL5           |
| Not defined | sp    | C4AMC7     | WASH3_HUMAN      | Putative WAS protein family homolog 3                                            | WASH3P          |

Supplementary Table 2.xlsx

| Cluster     | class | UNIPROT | UNIPROT_ID    | Description                                                                    | GN            |
|-------------|-------|---------|---------------|--------------------------------------------------------------------------------|---------------|
| Not defined | sp    | C9J069  | AJM1_HUMAN    | Apical junction component 1 homolog                                            | AJM1          |
| Not defined | sp    | C9JBD0  | KRBX1_HUMAN   | KRAB domain-containing protein 1                                               | KRBOX1        |
| Not defined | sp    | C9JLW8  | MCR11_HUMAN   | Mapk-regulated corepressor-interacting protein 1                               | MCRIP1        |
| Not defined | sp    | C9JN71  | ZN878_HUMAN   | Zinc finger protein 878                                                        | ZN878         |
| Not defined | sp    | C9JQI7  | TM232_HUMAN   | Transmembrane protein 232                                                      | TMEM232       |
| Not defined | sp    | C9JQL5  | DSA2D_HUMAN   | Putative dispanin subfamily A member 2d                                        | -             |
| Not defined | sp    | C9JRZ8  | AK1BF_HUMAN   | Aldo-keto reductase family 1 member B15                                        | AKR1B15       |
| Not defined | sp    | E5RJM6  | ANR65_HUMAN   | Ankyrin repeat domain-containing protein 65                                    | ANKRD65       |
| Not defined | sp    | E9PJJ5  | NPIA7_HUMAN   | Nuclear pore complex-interacting protein family member A7                      | NPIPA7        |
| Not defined | sp    | E9PQ53  | NDUCR_HUMAN   | NADH dehydrogenase [ubiquinone] 1 subunit C2, isoform 2                        | NDUFC2-KCTD14 |
| Not defined | sp    | E9PRG8  | CK098_HUMAN   | Uncharacterized protein C11orf98                                               | C11orf98      |
| Not defined | sp    | F2Z3M2  | CQ112_HUMAN   | Uncharacterized protein C17orf112                                              | C17orf112     |
| Not defined | sp    | G9CGD6  | CNIPF_HUMAN   | CNK3/IPCEF1 fusion protein                                                     | CNK3/IPCEF1   |
| Not defined | sp    | H7BZ55  | CRCC2_HUMAN   | Putative ciliary rootlet coiled-coil protein 2                                 | CROCC2        |
| Not defined | sp    | I1YAP6  | TRI77_HUMAN   | Tripartite motif-containing protein 77                                         | TRIM77        |
| Not defined | sp    | O00116  | ADAS_HUMAN    | Alkylidihydroxyacetonephosphate synthase, peroxisomal                          | AGPS          |
| Not defined | sp    | O00167  | EYA2_HUMAN    | Eyes absent homolog 2                                                          | EYA2          |
| Not defined | sp    | O00178  | GTPB1_HUMAN   | GTP-binding protein 1                                                          | GTPBP1        |
| Not defined | sp    | O00194  | RB27B_HUMAN   | Ras-related protein Rab-27B                                                    | RAB27B        |
| Not defined | sp    | O00203  | AP3B1_HUMAN   | AP-3 complex subunit beta-1                                                    | AP3B1         |
| Not defined | sp    | O00214  | LEG8_HUMAN    | Galectin-8                                                                     | LGALS8        |
| Not defined | sp    | O00219  | HYAS3_HUMAN   | Hyaluronan synthase 3                                                          | HAS3          |
| Not defined | sp    | O00220  | TR10A_HUMAN   | Tumor necrosis factor receptor superfamily member 10A                          | TNFRSF10A     |
| Not defined | sp    | O00232  | PSD12_HUMAN   | 26S proteasome non-ATPase regulatory subunit 12                                | PSMD12        |
| Not defined | sp    | O00257  | CBX4_HUMAN    | E3 SUMO-protein ligase CBX4                                                    | CBX4          |
| Not defined | sp    | O00300  | TR11B_HUMAN   | Tumor necrosis factor receptor superfamily member 11B                          | TNFRSF11B     |
| Not defined | sp    | O00308  | WWP2_HUMAN    | NEDD4-like E3 ubiquitin-protein ligase WWP2                                    | WWP2          |
| Not defined | sp    | O00330  | ODPX_HUMAN    | Pyruvate dehydrogenase protein X component, mitochondrial                      | PDHX          |
| Not defined | sp    | O00399  | DCTN6_HUMAN   | Dynactin subunit 6                                                             | DCTN6         |
| Not defined | sp    | O00401  | WASL_HUMAN    | Neural Wiskott-Aldrich syndrome protein                                        | WASL          |
| Not defined | sp    | O00410  | IPO5_HUMAN    | Importin-5                                                                     | IPO5          |
| Not defined | sp    | O00411  | RPOM_HUMAN    | DNA-directed RNA polymerase, mitochondrial                                     | POLRMT        |
| Not defined | sp    | O00418  | EF2K_HUMAN    | Eukaryotic elongation factor 2 kinase                                          | EEF2K         |
| Not defined | sp    | O00422  | SAP18_HUMAN   | Histone deacetylase complex subunit SAP18                                      | SAP18         |
| Not defined | sp    | O00423  | EMAL1_HUMAN   | Echinoderm microtubule-associated protein-like 1                               | EML1          |
| Not defined | sp    | O00429  | DNM1L_HUMAN   | Dynamin-1-like protein                                                         | DNM1L         |
| Not defined | sp    | O00442  | RTCA_HUMAN    | RNA 3'-terminal phosphate cyclase                                              | RTCA          |
| Not defined | sp    | O00443  | P3C2A_HUMAN   | Phosphatidylinositol 4-phosphate 3-kinase C2 domain-containing subunit alpha   | PIK3C2A       |
| Not defined | sp    | O00445  | SYT5_HUMAN    | Synaptotagmin-5                                                                | SYT5          |
| Not defined | sp    | O00462  | MANBA_HUMAN   | Beta-mannosidase                                                               | MANBA         |
| Not defined | sp    | O00479  | HMGN4_HUMAN   | High mobility group nucleosome-binding domain-containing protein 4             | HMGN4         |
| Not defined | sp    | O00481  | BT3A1_HUMAN   | Butyrophilin subfamily 3 member A1                                             | BTN3A1        |
| Not defined | sp    | O00483  | NDUA4_HUMAN   | Cytochrome c oxidase subunit NDUA4                                             | NDUFA4        |
| Not defined | sp    | O00488  | ZN593_HUMAN   | Zinc finger protein 593                                                        | ZN593         |
| Not defined | sp    | O00499  | BIN1_HUMAN    | Myc box-dependent-interacting protein 1                                        | BIN1          |
| Not defined | sp    | O00505  | IMA4_HUMAN    | Importin subunit alpha-4                                                       | KPNA3         |
| Not defined | sp    | O00506  | STK25_HUMAN   | Serine/threonine-protein kinase 25                                             | STK25         |
| Not defined | sp    | O00507  | USP9Y_HUMAN   | Probable ubiquitin carboxyl-terminal hydrolase FAF-Y                           | USP9Y         |
| Not defined | sp    | O00512  | BCL9_HUMAN    | B-cell CLL/lymphoma 9 protein                                                  | BCL9          |
| Not defined | sp    | O00515  | LAD1_HUMAN    | Ladinin-1                                                                      | LAD1          |
| Not defined | sp    | O00541  | PESC_HUMAN    | Pescadillo homolog                                                             | PES1          |
| Not defined | sp    | O00555  | CAC1A_HUMAN   | Voltage-dependent P/Q-type calcium channel subunit alpha-1A                    | CACNA1A       |
| Not defined | sp    | O00559  | RCAS1_HUMAN   | Receptor-binding cancer antigen expressed on SiSo cells                        | EBAG9         |
| Not defined | sp    | O00560  | SDCB1_HUMAN   | Syntenin-1                                                                     | SDCBP         |
| Not defined | sp    | O00566  | MPP10_HUMAN   | U3 small nucleolar ribonucleoprotein protein MPP10                             | MPHOSPH10     |
| Not defined | sp    | O00567  | NOP56_HUMAN   | Nucleolar protein 56                                                           | NOP56         |
| Not defined | sp    | O00571  | DDX3X_HUMAN   | ATP-dependent RNA helicase DDX3X                                               | DDX3X         |
| Not defined | sp    | O00584  | RNT2_HUMAN    | Ribonuclease T2                                                                | RNASET2       |
| Not defined | sp    | O00592  | PODXL_HUMAN   | Podocalyxin                                                                    | PODXL         |
| Not defined | sp    | O00622  | CCN1_HUMAN    | CCN family member 1                                                            | CCN1          |
| Not defined | sp    | O00629  | IMA3_HUMAN    | Importin subunit alpha-3                                                       | KPNA4         |
| Not defined | sp    | O00712  | NFIB_HUMAN    | Nuclear factor 1 B-type                                                        | NFIB          |
| Not defined | sp    | O00754  | MA2B1_HUMAN   | Lysosomal alpha-mannosidase                                                    | MAN2B1        |
| Not defined | sp    | O00757  | F16P2_HUMAN   | Fructose-1,6-bisphosphatase isozyme 2                                          | FBP2          |
| Not defined | sp    | O00762  | UBE2C_HUMAN   | Ubiquitin-conjugating enzyme E2 C                                              | UBE2C         |
| Not defined | sp    | O00767  | ACOD_HUMAN    | Acyl-CoA desaturase                                                            | SCD           |
| Not defined | sp    | O14490  | DLGAP1_HUMAN  | Disks large-associated protein 1                                               | DLGAP1        |
| Not defined | sp    | O14493  | CLD4_HUMAN    | Claudin-4                                                                      | CLDN4         |
| Not defined | sp    | O14494  | PLPP1_HUMAN   | Phospholipid phosphatase 1                                                     | PLPP1         |
| Not defined | sp    | O14497  | ARID1A_HUMAN  | AT-rich interactive domain-containing protein 1A                               | ARID1A        |
| Not defined | sp    | O14503  | BHLHE40_HUMAN | Class E basic helix-loop-helix protein 40                                      | BHLHE40       |
| Not defined | sp    | O14512  | SOC57_HUMAN   | Suppressor of cytokine signaling 7                                             | SOC57         |
| Not defined | sp    | O14513  | NCKP5_HUMAN   | Nck-associated protein 5                                                       | NCKAP5        |
| Not defined | sp    | O14521  | DHSD_HUMAN    | Succinate dehydrogenase [ubiquinone] cytochrome b small subunit, mitochondrial | SDHD          |
| Not defined | sp    | O14529  | CUX2_HUMAN    | Homeobox protein cut-like 2                                                    | CUX2          |
| Not defined | sp    | O14530  | TXND9_HUMAN   | Thioredoxin domain-containing protein 9                                        | TXND9         |
| Not defined | sp    | O14548  | COX7R_HUMAN   | Cytochrome c oxidase subunit 7A-related protein, mitochondrial                 | COX7A2L       |
| Not defined | sp    | O14576  | DC111_HUMAN   | Cytoplasmic dynein 1 intermediate chain 1                                      | DYNC111       |
| Not defined | sp    | O14579  | COPE_HUMAN    | Coatomer subunit epsilon                                                       | COPE          |
| Not defined | sp    | O14604  | TYB4Y_HUMAN   | Thymosin beta-4, Y-chromosomal                                                 | TMSB4Y        |
| Not defined | sp    | O14617  | AP3D1_HUMAN   | AP-3 complex subunit delta-1                                                   | AP3D1         |
| Not defined | sp    | O14618  | CCS_HUMAN     | Copper chaperone for superoxide dismutase                                      | CCS           |
| Not defined | sp    | O14633  | LCE2B_HUMAN   | Late cornified envelope protein 2B                                             | LCE2B         |
| Not defined | sp    | O14639  | ABLIM1_HUMAN  | Actin-binding LIM protein 1                                                    | ABLIM1        |
| Not defined | sp    | O14646  | CHD1_HUMAN    | Chromodomain-helicase-DNA-binding protein 1                                    | CHD1          |
| Not defined | sp    | O14653  | GOSR2_HUMAN   | Golgi SNAP receptor complex member 2                                           | GOSR2         |
| Not defined | sp    | O14657  | TOR1B_HUMAN   | Torsin-1B                                                                      | TOR1B         |
| Not defined | sp    | O14662  | STX16_HUMAN   | Syntaxin-16                                                                    | STX16         |
| Not defined | sp    | O14672  | ADA10_HUMAN   | Disintegrin and metalloproteinase domain-containing protein 10                 | ADAM10        |
| Not defined | sp    | O14683  | P5111_HUMAN   | Tumor protein p53-inducible protein 11                                         | TP53I11       |

Supplementary Table 2.xlsx

| Cluster     | class | UNIPROT | UNIPROT_ID   | Description                                                                     | GN        |
|-------------|-------|---------|--------------|---------------------------------------------------------------------------------|-----------|
| Not defined | sp    | O14684  | PTGES_HUMAN  | Prostaglandin E synthase                                                        | PTGES     |
| Not defined | sp    | O14713  | ITBP1_HUMAN  | Integrin beta-1-binding protein 1                                               | ITGB1BP1  |
| Not defined | sp    | O14727  | APAF_HUMAN   | Apoptotic protease-activating factor 1                                          | APAF1     |
| Not defined | sp    | O14734  | ACOT8_HUMAN  | Acyl-coenzyme A thioesterase 8                                                  | ACOT8     |
| Not defined | sp    | O14757  | CHK1_HUMAN   | Serine/threonine-protein kinase Chk1                                            | CHEK1     |
| Not defined | sp    | O14763  | TR10B_HUMAN  | Tumor necrosis factor receptor superfamily member 10B                           | TNFRSF10B |
| Not defined | sp    | O14776  | TCRG1_HUMAN  | Transcription elongation regulator 1                                            | TCERG1    |
| Not defined | sp    | O14786  | NRP1_HUMAN   | Neuropilin-1                                                                    | NRP1      |
| Not defined | sp    | O14792  | HS3S1_HUMAN  | Heparan sulfate glucosamine 3-O-sulfotransferase 1                              | HS3ST1    |
| Not defined | sp    | O14817  | TSN4_HUMAN   | Tetraspanin-4                                                                   | TSPAN4    |
| Not defined | sp    | O14827  | RGRF2_HUMAN  | Ras-specific guanine nucleotide-releasing factor 2                              | RASGRF2   |
| Not defined | sp    | O14828  | SCAM3_HUMAN  | Secretory carrier-associated membrane protein 3                                 | SCAMP3    |
| Not defined | sp    | O14832  | PAHX_HUMAN   | Phytanoyl-CoA dioxygenase, peroxisomal                                          | PHYH      |
| Not defined | sp    | O14841  | OPLA_HUMAN   | 5-oxoprolinase                                                                  | OPLAH     |
| Not defined | sp    | O14862  | AIM2_HUMAN   | Interferon-inducible protein AIM2                                               | AIM2      |
| Not defined | sp    | O14879  | IFIT3_HUMAN  | Interferon-induced protein with tetratricopeptide repeats 3                     | IFIT3     |
| Not defined | sp    | O14880  | MGST3_HUMAN  | Microsomal glutathione S-transferase 3                                          | MGST3     |
| Not defined | sp    | O14893  | GEM12_HUMAN  | Gem-associated protein 2                                                        | GEMIN2    |
| Not defined | sp    | O14896  | IRF6_HUMAN   | Interferon regulatory factor 6                                                  | IRF6      |
| Not defined | sp    | O14908  | GIPC1_HUMAN  | PDZ domain-containing protein GIPC1                                             | GIPC1     |
| Not defined | sp    | O14924  | RGS12_HUMAN  | Regulator of G-protein signaling 12                                             | RGS12     |
| Not defined | sp    | O14929  | HAT1_HUMAN   | Histone acetyltransferase type B catalytic subunit                              | HAT1      |
| Not defined | sp    | O14936  | CSKP_HUMAN   | Peripheral plasma membrane protein CASK                                         | CASK      |
| Not defined | sp    | O14949  | QCR8_HUMAN   | Cytochrome b-c1 complex subunit 8                                               | UQCRCQ    |
| Not defined | sp    | O14967  | CLGN_HUMAN   | Calmequin                                                                       | CLGN      |
| Not defined | sp    | O14974  | MYP1_HUMAN   | Protein phosphatase 1 regulatory subunit 12A                                    | PPP1R12A  |
| Not defined | sp    | O14980  | XPO1_HUMAN   | Exportin-1                                                                      | XPO1      |
| Not defined | sp    | O14983  | AT2A1_HUMAN  | Sarcoplasmic/endoplasmic reticulum calcium ATPase 1                             | ATP2A1    |
| Not defined | sp    | O15015  | ZN646_HUMAN  | Zinc finger protein 646                                                         | ZNF646    |
| Not defined | sp    | O15021  | MAST4_HUMAN  | Microtubule-associated serine/threonine-protein kinase 4                        | MAST4     |
| Not defined | sp    | O15027  | SC16A_HUMAN  | Protein transport protein Sec16A                                                | SEC16A    |
| Not defined | sp    | O15031  | PLXB2_HUMAN  | Plexin-B2                                                                       | PLXNB2    |
| Not defined | sp    | O15042  | SR140_HUMAN  | U2 snRNP-associated SURP motif-containing protein                               | U2SURP    |
| Not defined | sp    | O15050  | TRNK1_HUMAN  | TPR and ankyrin repeat-containing protein 1                                     | TRANK1    |
| Not defined | sp    | O15061  | SYNM_HUMAN   | Synemin                                                                         | SYNM      |
| Not defined | sp    | O15067  | PUR4_HUMAN   | Phosphoribosylformylglycinamide synthase                                        | PFAS      |
| Not defined | sp    | O15068  | MCF2L_HUMAN  | Guanine nucleotide exchange factor DBS                                          | MCF2L     |
| Not defined | sp    | O15078  | CE290_HUMAN  | Centrosomal protein of 290 kDa                                                  | CEP290    |
| Not defined | sp    | O15083  | ERC2_HUMAN   | ERC protein 2                                                                   | ERC2      |
| Not defined | sp    | O15090  | ZN536_HUMAN  | Zinc finger protein 536                                                         | ZNF536    |
| Not defined | sp    | O15116  | LSM1_HUMAN   | U6 snRNA-associated Sm-like protein Lsm1                                        | LSM1      |
| Not defined | sp    | O15118  | NPC1_HUMAN   | NPC intracellular cholesterol transporter 1                                     | NPC1      |
| Not defined | sp    | O15126  | SCAM1_HUMAN  | Secretory carrier-associated membrane protein 1                                 | SCAMP1    |
| Not defined | sp    | O15155  | BET1_HUMAN   | BET1 homolog                                                                    | BET1      |
| Not defined | sp    | O15156  | ZBT7B_HUMAN  | Zinc finger and BTB domain-containing protein 7B                                | ZBTB7B    |
| Not defined | sp    | O15160  | RPAC1_HUMAN  | DNA-directed RNA polymerases I and III subunit RPAC1                            | POLR1C    |
| Not defined | sp    | O15182  | CETN3_HUMAN  | Centrin-3                                                                       | CETN3     |
| Not defined | sp    | O15194  | CTDSL_HUMAN  | CTD small phosphatase-like protein                                              | CTDSPL    |
| Not defined | sp    | O15195  | VILL_HUMAN   | Villin-like protein                                                             | VILL      |
| Not defined | sp    | O15211  | RGL2_HUMAN   | Rai guanine nucleotide dissociation stimulator-like 2                           | RGL2      |
| Not defined | sp    | O15213  | WDR46_HUMAN  | WD repeat-containing protein 46                                                 | WDR46     |
| Not defined | sp    | O15217  | GSTA4_HUMAN  | Glutathione S-transferase A4                                                    | GSTA4     |
| Not defined | sp    | O15228  | GNPAT_HUMAN  | Dihydroxyacetone phosphate acyltransferase                                      | GNPAT     |
| Not defined | sp    | O15231  | ZN185_HUMAN  | Zinc finger protein 185                                                         | ZNF185    |
| Not defined | sp    | O15234  | CASC3_HUMAN  | Protein CASC3                                                                   | CASC3     |
| Not defined | sp    | O15240  | VGFB_HUMAN   | Neurosecretory protein VGF                                                      | VGFB      |
| Not defined | sp    | O15258  | RER1_HUMAN   | Protein RER1                                                                    | RER1      |
| Not defined | sp    | O15260  | SURF4_HUMAN  | Surfeit locus protein 4                                                         | SURF4     |
| Not defined | sp    | O15264  | MK13_HUMAN   | Mitogen-activated protein kinase 13                                             | MAPK13    |
| Not defined | sp    | O15265  | ATXN7_HUMAN  | Ataxin-7                                                                        | ATXN7     |
| Not defined | sp    | O15269  | SPTC1_HUMAN  | Serine palmitoyltransferase 1                                                   | SPTLC1    |
| Not defined | sp    | O15294  | OGT1_HUMAN   | UDP-N-acetylglucosamine-peptide N-acetylglucosaminyltransferase 110 kDa subunit | OGT       |
| Not defined | sp    | O15305  | PMM2_HUMAN   | Phosphomannomutase 2                                                            | PMM2      |
| Not defined | sp    | O15318  | RPC7_HUMAN   | DNA-directed RNA polymerase III subunit RPC7                                    | POLR3G    |
| Not defined | sp    | O15321  | TM9SF1_HUMAN | Transmembrane 9 superfamily member 1                                            | TM9SF1    |
| Not defined | sp    | O15327  | INP4B_HUMAN  | Inositol polyphosphate 4-phosphatase type II                                    | INPP4B    |
| Not defined | sp    | O15350  | P73_HUMAN    | Tumor protein p73                                                               | TP73      |
| Not defined | sp    | O15371  | EIF3D_HUMAN  | Eukaryotic translation initiation factor 3 subunit D                            | EIF3D     |
| Not defined | sp    | O15400  | STX7_HUMAN   | Syntaxin-7                                                                      | STX7      |
| Not defined | sp    | O15427  | MOT4_HUMAN   | Monocarboxylate transporter 4                                                   | SLC16A3   |
| Not defined | sp    | O15438  | MRP3_HUMAN   | Canalicular multispecific organic anion transporter 2                           | ABCC3     |
| Not defined | sp    | O15460  | P4HA2_HUMAN  | Prolyl 4-hydroxylase subunit alpha-2                                            | P4HA2     |
| Not defined | sp    | O15479  | MAGB2_HUMAN  | Melanoma-associated antigen B2                                                  | MAGEB2    |
| Not defined | sp    | O15480  | MAGB3_HUMAN  | Melanoma-associated antigen B3                                                  | MAGEB3    |
| Not defined | sp    | O15481  | MAGB4_HUMAN  | Melanoma-associated antigen B4                                                  | MAGEB4    |
| Not defined | sp    | O15484  | CAN5_HUMAN   | Calpain-5                                                                       | CAPN5     |
| Not defined | sp    | O15514  | RPB4_HUMAN   | DNA-directed RNA polymerase II subunit RPB4                                     | POLR2D    |
| Not defined | sp    | O15523  | DDX3Y_HUMAN  | ATP-dependent RNA helicase DDX3Y                                                | DDX3Y     |
| Not defined | sp    | O15533  | TPSN_HUMAN   | Tapasin                                                                         | TAPBP     |
| Not defined | sp    | O15541  | R113A_HUMAN  | E3 ubiquitin-protein ligase RNF113A                                             | RNF113A   |
| Not defined | sp    | O15551  | CLD3_HUMAN   | Claudin-3                                                                       | CLDN3     |
| Not defined | sp    | O43143  | DHX15_HUMAN  | Pre-mRNA-splicing factor ATP-dependent RNA helicase DHX15                       | DHX15     |
| Not defined | sp    | O43148  | MCES_HUMAN   | mRNA cap guanine-N7 methyltransferase                                           | RNMT      |
| Not defined | sp    | O43149  | ZZEF1_HUMAN  | Zinc finger ZZ-type and EF-hand domain-containing protein 1                     | ZZEF1     |
| Not defined | sp    | O43151  | TET3_HUMAN   | Methylcytosine dioxygenase TET3                                                 | TET3      |
| Not defined | sp    | O43155  | FLRT2_HUMAN  | Leucine-rich repeat transmembrane protein FLRT2                                 | FLRT2     |
| Not defined | sp    | O43172  | PRP4_HUMAN   | U4/U6 small nuclear ribonucleoprotein Prp4                                      | PRPF4     |
| Not defined | sp    | O43181  | NDU54_HUMAN  | NADH dehydrogenase [ubiquinone] iron-sulfur protein 4, mitochondrial            | NDUFS4    |
| Not defined | sp    | O43237  | DC1L2_HUMAN  | Cytoplasmic dynein 1 light intermediate chain 2                                 | DYNC1L2   |
| Not defined | sp    | O43242  | PSMD3_HUMAN  | 26S proteasome non-ATPase regulatory subunit 3                                  | PSMD3     |

Supplementary Table 2.xlsx

| Cluster     | class | UNIPROT | UNIPROT_ID  | Description                                                                                   | GN       |
|-------------|-------|---------|-------------|-----------------------------------------------------------------------------------------------|----------|
| Not defined | sp    | O43252  | PAPS1_HUMAN | Bifunctional 3'-phosphoadenosine 5'-phosphosulfate synthase 1                                 | PAPSS1   |
| Not defined | sp    | O43272  | PROD_HUMAN  | Proline dehydrogenase 1, mitochondrial                                                        | PRODH    |
| Not defined | sp    | O43278  | SPIT1_HUMAN | Kunitz-type protease inhibitor 1                                                              | SPINT1   |
| Not defined | sp    | O43286  | B4GT5_HUMAN | Beta-1,4-galactosyltransferase 5                                                              | B4GALT5  |
| Not defined | sp    | O43291  | SPIT2_HUMAN | Kunitz-type protease inhibitor 2                                                              | SPINT2   |
| Not defined | sp    | O43293  | DAPK3_HUMAN | Death-associated protein kinase 3                                                             | DAPK3    |
| Not defined | sp    | O43304  | S14L5_HUMAN | SEC14-like protein 5                                                                          | SEC14L5  |
| Not defined | sp    | O43345  | ZN208_HUMAN | Zinc finger protein 208                                                                       | ZNF208   |
| Not defined | sp    | O43361  | ZN749_HUMAN | Zinc finger protein 749                                                                       | ZNF749   |
| Not defined | sp    | O43395  | PRPF3_HUMAN | U4/U6 small nuclear ribonucleoprotein Prp3                                                    | PRPF3    |
| Not defined | sp    | O43414  | ERI3_HUMAN  | ERI1 exoribonuclease 3                                                                        | ERI3     |
| Not defined | sp    | O43432  | IF4G3_HUMAN | Eukaryotic translation initiation factor 4 gamma 3                                            | EIF4G3   |
| Not defined | sp    | O43464  | HTRA2_HUMAN | Serine protease HTRA2, mitochondrial                                                          | HTRA2    |
| Not defined | sp    | O43493  | TGON2_HUMAN | Trans-Golgi network integral membrane protein 2                                               | TGOLN2   |
| Not defined | sp    | O43497  | CAC1G_HUMAN | Voltage-dependent T-type calcium channel subunit alpha-1G                                     | CACNA1G  |
| Not defined | sp    | O43504  | LTOR5_HUMAN | Ragulator complex protein LAMTOR5                                                             | LAMTOR5  |
| Not defined | sp    | O43505  | B4GA1_HUMAN | Beta-1,4-glucuronyltransferase 1                                                              | B4GAT1   |
| Not defined | sp    | O43516  | WIPF1_HUMAN | WAS/WASL-interacting protein family member 1                                                  | WIPF1    |
| Not defined | sp    | O43526  | KCNQ2_HUMAN | Potassium voltage-gated channel subfamily KQT member 2                                        | KCNQ2    |
| Not defined | sp    | O43567  | RNF13_HUMAN | E3 ubiquitin-protein ligase RNF13                                                             | RNF13    |
| Not defined | sp    | O43592  | XPOT_HUMAN  | Exportin-T                                                                                    | XPOT     |
| Not defined | sp    | O43597  | SPY2_HUMAN  | Protein sprouty homolog 2                                                                     | SPRY2    |
| Not defined | sp    | O43609  | SPY1_HUMAN  | Protein sprouty homolog 1                                                                     | SPRY1    |
| Not defined | sp    | O43615  | TIM44_HUMAN | Mitochondrial import inner membrane translocase subunit TIM44                                 | TIMM44   |
| Not defined | sp    | O43617  | TPPC3_HUMAN | Trafficking protein particle complex subunit 3                                                | TRAPP3   |
| Not defined | sp    | O43639  | NCK2_HUMAN  | Cytoplasmic protein NCK2                                                                      | NCK2     |
| Not defined | sp    | O43657  | TSN6_HUMAN  | Tetraspanin-6                                                                                 | TSPAN6   |
| Not defined | sp    | O43660  | PLRG1_HUMAN | Pleiotropic regulator 1                                                                       | PLRG1    |
| Not defined | sp    | O43665  | RGS10_HUMAN | Regulator of G-protein signaling 10                                                           | RGS10    |
| Not defined | sp    | O43674  | NDUB5_HUMAN | NADH dehydrogenase [ubiquinone] 1 beta subcomplex subunit 5, mitochondrial                    | NDUFB5   |
| Not defined | sp    | O43677  | NDUC1_HUMAN | NADH dehydrogenase [ubiquinone] 1 subunit C1, mitochondrial                                   | NDUFC1   |
| Not defined | sp    | O43679  | LDB2_HUMAN  | LIM domain-binding protein 2                                                                  | LDB2     |
| Not defined | sp    | O43688  | PLPP2_HUMAN | Phospholipid phosphatase 2                                                                    | PLPP2    |
| Not defined | sp    | O43708  | MAAI_HUMAN  | Maleylacetoacetate isomerase                                                                  | GSTZ1    |
| Not defined | sp    | O43716  | GATC_HUMAN  | Glutamyl-tRNA(Gln) amidotransferase subunit C, mitochondrial                                  | GATC     |
| Not defined | sp    | O43719  | HTSF1_HUMAN | HIV Tat-specific factor 1                                                                     | HTATSF1  |
| Not defined | sp    | O43734  | CIKS_HUMAN  | Adapter protein CIKS                                                                          | TRAF3IP2 |
| Not defined | sp    | O43747  | AP1G1_HUMAN | AP-1 complex subunit gamma-1                                                                  | AP1G1    |
| Not defined | sp    | O43759  | SNG1_HUMAN  | Synaptogyrin-1                                                                                | SYNGR1   |
| Not defined | sp    | O43760  | SNG2_HUMAN  | Synaptogyrin-2                                                                                | SYNGR2   |
| Not defined | sp    | O43761  | SNG3_HUMAN  | Synaptogyrin-3                                                                                | SYNGR3   |
| Not defined | sp    | O43766  | LIAS_HUMAN  | Lipoyl synthase, mitochondrial                                                                | LIAS     |
| Not defined | sp    | O43795  | MYO1B_HUMAN | Unconventional myosin-1b                                                                      | MYO1B    |
| Not defined | sp    | O43805  | SSNA1_HUMAN | Sjoegren syndrome nuclear autoantigen 1                                                       | SSNA1    |
| Not defined | sp    | O43815  | STRN_HUMAN  | Striatin                                                                                      | STRN     |
| Not defined | sp    | O43819  | SCO2_HUMAN  | Protein SCO2 homolog, mitochondrial                                                           | SCO2     |
| Not defined | sp    | O43837  | IDH3B_HUMAN | Isocitrate dehydrogenase [NAD] subunit beta, mitochondrial                                    | IDH3B    |
| Not defined | sp    | O43847  | NRDC_HUMAN  | Nardilysin                                                                                    | NRDC     |
| Not defined | sp    | O43861  | ATP9B_HUMAN | Probable phospholipid-transporting ATPase 11B                                                 | ATP9B    |
| Not defined | sp    | O43896  | KIF1C_HUMAN | Kinesin-like protein KIF1C                                                                    | KIF1C    |
| Not defined | sp    | O43909  | EXTL3_HUMAN | Exostosin-like 3                                                                              | EXTL3    |
| Not defined | sp    | O43918  | AIRE_HUMAN  | Autoimmune regulator                                                                          | AIRE     |
| Not defined | sp    | O43924  | PDE6D_HUMAN | Retinal rod rhodopsin-sensitive cGMP 3',5'-cyclic phosphodiesterase subunit delta             | PDE6D    |
| Not defined | sp    | O43933  | PEX1_HUMAN  | Peroxisome biogenesis factor 1                                                                | PEX1     |
| Not defined | sp    | O60216  | RAD21_HUMAN | Double-strand-break repair protein rad21 homolog                                              | RAD21    |
| Not defined | sp    | O60231  | DHX16_HUMAN | Pre-mRNA-splicing factor ATP-dependent RNA helicase DHX16                                     | DHX16    |
| Not defined | sp    | O60232  | ZNRD2_HUMAN | Protein ZNRD2                                                                                 | ZNRD2    |
| Not defined | sp    | O60234  | GMFG_HUMAN  | Glia maturation factor gamma                                                                  | GMFG     |
| Not defined | sp    | O60237  | MYPT2_HUMAN | Protein phosphatase 1 regulatory subunit 12B                                                  | PPP1R12B |
| Not defined | sp    | O60241  | AGRB2_HUMAN | Adhesion G protein-coupled receptor B2                                                        | ADGRB2   |
| Not defined | sp    | O60245  | PCDH7_HUMAN | Protocadherin-7                                                                               | PCDH7    |
| Not defined | sp    | O60248  | SOX15_HUMAN | Protein SOX-15                                                                                | SOX15    |
| Not defined | sp    | O60256  | KPRB_HUMAN  | Phosphoribosyl pyrophosphate synthase-associated protein 2                                    | PRPSAP2  |
| Not defined | sp    | O60262  | GBG7_HUMAN  | Guanine nucleotide-binding protein G(I)/G(S)/G(O) subunit gamma-7                             | GNB7     |
| Not defined | sp    | O60264  | SMCA5_HUMAN | SWI/SNF-related matrix-associated actin-dependent regulator of chromatin subfamily A member 5 | SMARCA5  |
| Not defined | sp    | O60268  | K0513_HUMAN | Uncharacterized protein KIAA0513                                                              | KIAA0513 |
| Not defined | sp    | O60281  | ZN292_HUMAN | Zinc finger protein 292                                                                       | ZNF292   |
| Not defined | sp    | O60282  | KIF5C_HUMAN | Kinesin heavy chain isoform 5C                                                                | KIF5C    |
| Not defined | sp    | O60299  | LZTS3_HUMAN | Leucine zipper putative tumor suppressor 3                                                    | LZTS3    |
| Not defined | sp    | O60304  | ZN500_HUMAN | Zinc finger protein 500                                                                       | ZNF500   |
| Not defined | sp    | O60312  | AT10A_HUMAN | Probable phospholipid-transporting ATPase VA                                                  | ATP10A   |
| Not defined | sp    | O60313  | OPA1_HUMAN  | Dynamin-like 120 kDa protein, mitochondrial                                                   | OPA1     |
| Not defined | sp    | O60333  | KIF1B_HUMAN | Kinesin-like protein KIF1B                                                                    | KIF1B    |
| Not defined | sp    | O60437  | PEPL_HUMAN  | Periplakin                                                                                    | PPL      |
| Not defined | sp    | O60443  | GSDME_HUMAN | Gasdermin-E                                                                                   | GSDME    |
| Not defined | sp    | O60447  | EVIS_HUMAN  | Ecotropic viral integration site 5 protein homolog                                            | EVIS     |
| Not defined | sp    | O60449  | LY75_HUMAN  | Lymphocyte antigen 75                                                                         | LY75     |
| Not defined | sp    | O60462  | NRP2_HUMAN  | Neuropilin-2                                                                                  | NRP2     |
| Not defined | sp    | O60487  | MPZL2_HUMAN | Myelin protein zero-like protein 2                                                            | MPZL2    |
| Not defined | sp    | O60488  | ACSL4_HUMAN | Long-chain-fatty-acid-CoA ligase 4                                                            | ACSL4    |
| Not defined | sp    | O60494  | CUBN_HUMAN  | Cubilin                                                                                       | CUBN     |
| Not defined | sp    | O60499  | STX10_HUMAN | Syntaxin-10                                                                                   | STX10    |
| Not defined | sp    | O60502  | OGA_HUMAN   | Protein O-GlcNAcase                                                                           | OGA      |
| Not defined | sp    | O60504  | VINEX_HUMAN | Vinexin                                                                                       | SORBS3   |
| Not defined | sp    | O60518  | RNBP6_HUMAN | Ran-binding protein 6                                                                         | RANBP6   |
| Not defined | sp    | O60547  | GMDS_HUMAN  | GDP-mannose 4,6 dehydratase                                                                   | GMDS     |
| Not defined | sp    | O60551  | NMT2_HUMAN  | Glycylpeptide N-tetradecanoyltransferase 2                                                    | NMT2     |
| Not defined | sp    | O60610  | DIAP1_HUMAN | Protein diaphanous homolog 1                                                                  | DIAPH1   |
| Not defined | sp    | O60613  | SEP15_HUMAN | Selenoprotein F                                                                               | SELENOF  |
| Not defined | sp    | O60637  | TSN3_HUMAN  | Tetraspanin-3                                                                                 | TSPAN3   |

Supplementary Table 2.xlsx

| Cluster     | class | UNIPROT | UNIPROT_ID    | Description                                                                   | GN        |
|-------------|-------|---------|---------------|-------------------------------------------------------------------------------|-----------|
| Not defined | sp    | O60641  | AP180_HUMAN   | Clathrin coat assembly protein AP180                                          | SNAP91    |
| Not defined | sp    | O60682  | MUSC_HUMAN    | Musculin                                                                      | MSC       |
| Not defined | sp    | O60687  | SRPX2_HUMAN   | Sushi repeat-containing protein SRPX2                                         | SRPX2     |
| Not defined | sp    | O60706  | ABCC9_HUMAN   | ATP-binding cassette sub-family C member 9                                    | ABCC9     |
| Not defined | sp    | O60716  | CTND1_HUMAN   | Catenin delta-1                                                               | CTNND1    |
| Not defined | sp    | O60732  | MAGC1_HUMAN   | Melanoma-associated antigen C1                                                | MAGEC1    |
| Not defined | sp    | O60749  | SNX2_HUMAN    | Sorting nexin-2                                                               | SNX2      |
| Not defined | sp    | O60763  | USO1_HUMAN    | General vesicular transport factor p115                                       | USO1      |
| Not defined | sp    | O60783  | RT14_HUMAN    | 28S ribosomal protein S14, mitochondrial                                      | MRPS14    |
| Not defined | sp    | O60784  | TOM1_HUMAN    | Target of Myb protein 1                                                       | TOM1      |
| Not defined | sp    | O60810  | PRAM4_HUMAN   | PRAME family member 4                                                         | PRAMEF4   |
| Not defined | sp    | O60825  | F2G2_HUMAN    | 6-phosphofructo-2-kinase/fructose-2,6-bisphosphatase 2                        | PFKFB2    |
| Not defined | sp    | O60895  | RAMP2_HUMAN   | Receptor activity-modifying protein 2                                         | RAMP2     |
| Not defined | sp    | O60907  | TBL1X_HUMAN   | F-box-like/WD repeat-containing protein TBL1X                                 | TBL1X     |
| Not defined | sp    | O60911  | CATL2_HUMAN   | Cathepsin L2                                                                  | CTSV      |
| Not defined | sp    | O60927  | PP1R8_HUMAN   | E3 ubiquitin-protein ligase PPP1R11                                           | PPP1R11   |
| Not defined | sp    | O60934  | NBN_HUMAN     | Nibrin                                                                        | NBN       |
| Not defined | sp    | O60936  | NOL3_HUMAN    | Nucleolar protein 3                                                           | NOL3      |
| Not defined | sp    | O75030  | MITF_HUMAN    | Microphthalmia-associated transcription factor                                | MITF      |
| Not defined | sp    | O75054  | IGSF3_HUMAN   | Immunoglobulin superfamily member 3                                           | IGSF3     |
| Not defined | sp    | O75063  | XYLK_HUMAN    | Glycosaminoglycan xylosylkinase                                               | FAM20B    |
| Not defined | sp    | O75064  | DEN4B_HUMAN   | DENN domain-containing protein 4B                                             | DENN4B    |
| Not defined | sp    | O75071  | EFC14_HUMAN   | EF-hand calcium-binding domain-containing protein 14                          | EFCAB14   |
| Not defined | sp    | O75072  | FKTN_HUMAN    | Fukutin                                                                       | FKTN      |
| Not defined | sp    | O75093  | SLIT1_HUMAN   | Slit homolog 1 protein                                                        | SLIT1     |
| Not defined | sp    | O75096  | LRP4_HUMAN    | Low-density lipoprotein receptor-related protein 4                            | LRP4      |
| Not defined | sp    | O75106  | AOC2_HUMAN    | Retina-specific copper amine oxidase                                          | AOC2      |
| Not defined | sp    | O75116  | ROCK2_HUMAN   | Rho-associated protein kinase 2                                               | ROCK2     |
| Not defined | sp    | O75144  | ICOSL_HUMAN   | ICOS ligand                                                                   | ICOSLG    |
| Not defined | sp    | O75146  | HIP1R_HUMAN   | Huntingtin-interacting protein 1-related protein                              | HIP1R     |
| Not defined | sp    | O75150  | BRE1B_HUMAN   | E3 ubiquitin-protein ligase BRE1B                                             | RNF40     |
| Not defined | sp    | O75151  | PHF2_HUMAN    | Lysine-specific demethylase PHF2                                              | PHF2      |
| Not defined | sp    | O75153  | CLU_HUMAN     | Clustered mitochondria protein homolog                                        | CLUH      |
| Not defined | sp    | O75154  | RFIP3_HUMAN   | Rab11 family-interacting protein 3                                            | RAB11FIP3 |
| Not defined | sp    | O75157  | T2D2_HUMAN    | TSC22 domain family protein 2                                                 | TSC22D2   |
| Not defined | sp    | O75164  | KDM4A_HUMAN   | Lysine-specific demethylase 4A                                                | KDM4A     |
| Not defined | sp    | O75165  | DJC13_HUMAN   | DnaJ homolog subfamily C member 13                                            | DNAJC13   |
| Not defined | sp    | O75175  | CNOT3_HUMAN   | CCR4-NOT transcription complex subunit 3                                      | CNOT3     |
| Not defined | sp    | O75179  | ANKR17_HUMAN  | Ankyrin repeat domain-containing protein 17                                   | ANKRD17   |
| Not defined | sp    | O75185  | AT2C2_HUMAN   | Calcium-transporting ATPase type 2C member 2                                  | ATP2C2    |
| Not defined | sp    | O75190  | DNJB6_HUMAN   | DnaJ homolog subfamily B member 6                                             | DNAJB6    |
| Not defined | sp    | O75208  | COQ9_HUMAN    | Ubiquinone biosynthesis protein COQ9, mitochondrial                           | COQ9      |
| Not defined | sp    | O75251  | NDUS7_HUMAN   | NADH dehydrogenase [ubiquinone] iron-sulfur protein 7, mitochondrial          | NDUF57    |
| Not defined | sp    | O75323  | NIP52_HUMAN   | Protein NipSnap homolog 2                                                     | NIPSNAP2  |
| Not defined | sp    | O75326  | SEM7A_HUMAN   | Semaphorin-7A                                                                 | SEMA7A    |
| Not defined | sp    | O75333  | TBX10_HUMAN   | T-box transcription factor TBX10                                              | TBX10     |
| Not defined | sp    | O75352  | MPDU1_HUMAN   | Mannose-P-dolichol utilization defect 1 protein                               | MPDU1     |
| Not defined | sp    | O75362  | ZN217_HUMAN   | Zinc finger protein 217                                                       | ZNF217    |
| Not defined | sp    | O75368  | SH3L1_HUMAN   | SH3 domain-binding glutamic acid-rich-like protein                            | SH3BGL    |
| Not defined | sp    | O75373  | ZN737_HUMAN   | Zinc finger protein 737                                                       | ZNF737    |
| Not defined | sp    | O75379  | VAMP4_HUMAN   | Vesicle-associated membrane protein 4                                         | VAMP4     |
| Not defined | sp    | O75380  | NDUS6_HUMAN   | NADH dehydrogenase [ubiquinone] iron-sulfur protein 6, mitochondrial          | NDUF56    |
| Not defined | sp    | O75386  | TULP3_HUMAN   | Tubby-related protein 3                                                       | TULP3     |
| Not defined | sp    | O75391  | SPAG7_HUMAN   | Sperm-associated antigen 7                                                    | SPAG7     |
| Not defined | sp    | O75396  | SEC22B_HUMAN  | Vesicle-trafficking protein SEC22b                                            | SEC22B    |
| Not defined | sp    | O75400  | PRPF40A_HUMAN | Pre-mRNA-processing factor 40 homolog A                                       | PRPF40A   |
| Not defined | sp    | O75436  | VP26A_HUMAN   | Vacuolar protein sorting-associated protein 26A                               | VPS26A    |
| Not defined | sp    | O75445  | USH2A_HUMAN   | Usherin                                                                       | USH2A     |
| Not defined | sp    | O75474  | FRAT2_HUMAN   | GSK-3-binding protein FRAT2                                                   | FRAT2     |
| Not defined | sp    | O75477  | ERLIN1_HUMAN  | Erlin-1                                                                       | ERLIN1    |
| Not defined | sp    | O75478  | TADA2A_HUMAN  | Transcriptional adapter 2-alpha                                               | TADA2A    |
| Not defined | sp    | O75503  | CLN5_HUMAN    | Ceroid-lipofuscinosis neuronal protein 5                                      | CLN5      |
| Not defined | sp    | O75506  | HSBP1_HUMAN   | Heat shock factor-binding protein 1                                           | HSBP1     |
| Not defined | sp    | O75525  | KHDR3_HUMAN   | KH domain-containing, RNA-binding, signal transduction-associated protein 3   | KHDRBS3   |
| Not defined | sp    | O75526  | RMXL2_HUMAN   | RNA-binding motif protein, X-linked-like-2                                    | RBMXL2    |
| Not defined | sp    | O75530  | EED_HUMAN     | Polycomb protein EED                                                          | EED       |
| Not defined | sp    | O75533  | SF3B1_HUMAN   | Splicing factor 3B subunit 1                                                  | SF3B1     |
| Not defined | sp    | O75534  | CSDE1_HUMAN   | Cold shock domain-containing protein E1                                       | CSD1      |
| Not defined | sp    | O75541  | ZN821_HUMAN   | Zinc finger protein 821                                                       | ZNF821    |
| Not defined | sp    | O75554  | WBP4_HUMAN    | WW domain-binding protein 4                                                   | WBP4      |
| Not defined | sp    | O75558  | STX11_HUMAN   | Syntaxin-11                                                                   | STX11     |
| Not defined | sp    | O75569  | PRKRA_HUMAN   | Interferon-inducible double-stranded RNA-dependent protein kinase activator A | PRKRA     |
| Not defined | sp    | O75582  | KS6A5_HUMAN   | Ribosomal protein S6 kinase alpha-5                                           | RP56KA5   |
| Not defined | sp    | O75604  | UBP2_HUMAN    | Ubiquitin carboxyl-terminal hydrolase 2                                       | USP2      |
| Not defined | sp    | O75616  | ERAL1_HUMAN   | GTPase Era, mitochondrial                                                     | ERAL1     |
| Not defined | sp    | O75629  | CREG1_HUMAN   | Protein CREG1                                                                 | CREG1     |
| Not defined | sp    | O75643  | US20_HUMAN    | U5 small nuclear ribonucleoprotein 20 kDa helicase                            | SNRNP200  |
| Not defined | sp    | O75663  | TIPRL_HUMAN   | TIP41-like protein                                                            | TIPRL     |
| Not defined | sp    | O75674  | TM1L1_HUMAN   | TOM1-like protein 1                                                           | TOM1L1    |
| Not defined | sp    | O75683  | SURF6_HUMAN   | Surfeit locus protein 6                                                       | SURF6     |
| Not defined | sp    | O75688  | PPM1B_HUMAN   | Protein phosphatase 1B                                                        | PPM1B     |
| Not defined | sp    | O75691  | UTP20_HUMAN   | Small subunit processome component 20 homolog                                 | UTP20     |
| Not defined | sp    | O75694  | NU155_HUMAN   | Nuclear pore complex protein Nup155                                           | NUP155    |
| Not defined | sp    | O75695  | XRP2_HUMAN    | Protein XRP2                                                                  | RP2       |
| Not defined | sp    | O75717  | WDHD1_HUMAN   | WD repeat and HMG-box DNA-binding protein 1                                   | WDHD1     |
| Not defined | sp    | O75718  | CRTAP_HUMAN   | Cartilage-associated protein                                                  | CRTAP     |
| Not defined | sp    | O75746  | CMC1_HUMAN    | Calcium-binding mitochondrial carrier protein Aralar1                         | SLC25A12  |
| Not defined | sp    | O75747  | P3C2G_HUMAN   | Phosphatidylinositol 4-phosphate 3-kinase C2 domain-containing subunit gamma  | PIK3C2G   |
| Not defined | sp    | O75781  | PALM_HUMAN    | Paralemmin-1                                                                  | PALM      |
| Not defined | sp    | O75791  | GRAP2_HUMAN   | GRB2-related adapter protein 2                                                | GRAP2     |

Supplementary Table 2.xlsx

| Cluster     | class | UNIPROT | UNIPROT_ID   | Description                                                                  | GN       |
|-------------|-------|---------|--------------|------------------------------------------------------------------------------|----------|
| Not defined | sp    | O75792  | RNH2A_HUMAN  | Ribonuclease H2 subunit A                                                    | RNASEH2A |
| Not defined | sp    | O75817  | POP7_HUMAN   | Ribonuclease P protein subunit p20                                           | POP7     |
| Not defined | sp    | O75818  | RPP40_HUMAN  | Ribonuclease P protein subunit p40                                           | RPP40    |
| Not defined | sp    | O75821  | EIF3G_HUMAN  | Eukaryotic translation initiation factor 3 subunit G                         | EIF3G    |
| Not defined | sp    | O75830  | SPI2_HUMAN   | Serp12                                                                       | SERPINI2 |
| Not defined | sp    | O75832  | PSD10_HUMAN  | 26S proteasome non-ATPase regulatory subunit 10                              | PSMD10   |
| Not defined | sp    | O75843  | AP1G2_HUMAN  | AP-1 complex subunit gamma-like 2                                            | AP1G2    |
| Not defined | sp    | O75879  | GATB_HUMAN   | Glutamyl-tRNA(Gln) amidotransferase subunit B, mitochondrial                 | GATB     |
| Not defined | sp    | O75882  | ATRN_HUMAN   | Attractin                                                                    | ATRN     |
| Not defined | sp    | O75886  | STAM2_HUMAN  | Signal transducing adapter molecule 2                                        | STAM2    |
| Not defined | sp    | O75891  | AL1L1_HUMAN  | Cytosolic 10-formyltetrahydrofolate dehydrogenase                            | ALDH1L1  |
| Not defined | sp    | O75909  | CCNK_HUMAN   | Cyclin-K                                                                     | CCNK     |
| Not defined | sp    | O75911  | DHRS3_HUMAN  | Short-chain dehydrogenase/reductase 3                                        | DHRS3    |
| Not defined | sp    | O75912  | DGKI_HUMAN   | Diacylglycerol kinase iota                                                   | DGKI     |
| Not defined | sp    | O75914  | PAK3_HUMAN   | Serine/threonine-protein kinase PAK 3                                        | PAK3     |
| Not defined | sp    | O75915  | PRAF3_HUMAN  | PRA1 family protein 3                                                        | ARL6IP5  |
| Not defined | sp    | O75923  | DYSF_HUMAN   | Dysferlin                                                                    | DYSF     |
| Not defined | sp    | O75928  | PIAS2_HUMAN  | E3 SUMO-protein ligase PIAS2                                                 | PIAS2    |
| Not defined | sp    | O75934  | SPF27_HUMAN  | Pre-mRNA-splicing factor SPF27                                               | BCAS2    |
| Not defined | sp    | O75953  | DNJB5_HUMAN  | DnaJ homolog subfamily B member 5                                            | DNABJ5   |
| Not defined | sp    | O75954  | TSN9_HUMAN   | Tetraspanin-9                                                                | TSPAN9   |
| Not defined | sp    | O75976  | CBPD_HUMAN   | Carboxypeptidase D                                                           | CPD      |
| Not defined | sp    | O76021  | RL1D1_HUMAN  | Ribosomal L1 domain-containing protein 1                                     | RS1D1    |
| Not defined | sp    | O76031  | CLPX_HUMAN   | ATP-dependent Clp protease ATP-binding subunit clpX-like, mitochondrial      | CLPX     |
| Not defined | sp    | O76054  | S14L2_HUMAN  | SEC14-like protein 2                                                         | SEC14L2  |
| Not defined | sp    | O76070  | SYUG_HUMAN   | Gamma-synuclin                                                               | SNCG     |
| Not defined | sp    | O76071  | CIAO1_HUMAN  | Probable cytosolic iron-sulfur protein assembly protein CIAO1                | CIAO1    |
| Not defined | sp    | O76083  | PDE9A_HUMAN  | High affinity cGMP-specific 3',5'-cyclic phosphodiesterase 9A                | PDE9A    |
| Not defined | sp    | O76087  | GAGE7_HUMAN  | G antigen 7                                                                  | GAGE7    |
| Not defined | sp    | O76094  | SRP72_HUMAN  | Signal recognition particle subunit SRP72                                    | SRP72    |
| Not defined | sp    | O77932  | DXO_HUMAN    | Decapping and exoribonuclease protein                                        | DXO      |
| Not defined | sp    | O94760  | DDAH1_HUMAN  | N(G),N(G)-dimethylarginine dimethylaminohydrolase 1                          | DDAH1    |
| Not defined | sp    | O94763  | RMP_HUMAN    | Unconventional prefolin RP85 interactor 1                                    | UR11     |
| Not defined | sp    | O94766  | B3GA3_HUMAN  | Galactosylgalactosylxylosylprotein 3-beta-glucuronosyltransferase 3          | B3GAT3   |
| Not defined | sp    | O94776  | MTA2_HUMAN   | Metastasis-associated protein MTA2                                           | MTA2     |
| Not defined | sp    | O94788  | AL1A2_HUMAN  | Retinal dehydrogenase 2                                                      | ALDH1A2  |
| Not defined | sp    | O94805  | ACL6B_HUMAN  | Actin-like protein 6B                                                        | ACTL6B   |
| Not defined | sp    | O94808  | GFPT2_HUMAN  | Glutamine-fructose-6-phosphate aminotransferase [isomerizing] 2              | GFPT2    |
| Not defined | sp    | O94826  | TOM70_HUMAN  | Mitochondrial import receptor subunit TOM70                                  | TOMM70   |
| Not defined | sp    | O94850  | DEND_HUMAN   | Dendrin                                                                      | DDN      |
| Not defined | sp    | O94856  | NFASC_HUMAN  | Neurofascin                                                                  | NFASC    |
| Not defined | sp    | O94875  | SRBS2_HUMAN  | Sorbin and SH3 domain-containing protein 2                                   | SORBS2   |
| Not defined | sp    | O94880  | PHF14_HUMAN  | PHD finger protein 14                                                        | PHF14    |
| Not defined | sp    | O94885  | SASH1_HUMAN  | SAM and SH3 domain-containing protein 1                                      | SASH1    |
| Not defined | sp    | O94886  | CSC1_HUMAN   | CSC1-like protein 1                                                          | TMEM63A  |
| Not defined | sp    | O94888  | UBXN7_HUMAN  | UBX domain-containing protein 7                                              | UBXN7    |
| Not defined | sp    | O94898  | LRIG2_HUMAN  | Leucine-rich repeats and immunoglobulin-like domains protein 2               | LRIG2    |
| Not defined | sp    | O94905  | ERLN2_HUMAN  | Erlin-2                                                                      | ERLN2    |
| Not defined | sp    | O94910  | AGRL1_HUMAN  | Adhesion G protein-coupled receptor L1                                       | ADGRL1   |
| Not defined | sp    | O94919  | ENDD1_HUMAN  | Endonuclease domain-containing 1 protein                                     | ENDOD1   |
| Not defined | sp    | O94921  | CDK14_HUMAN  | Cyclin-dependent kinase 14                                                   | CDK14    |
| Not defined | sp    | O94925  | GLSK_HUMAN   | Glutaminase kidney isoform, mitochondrial                                    | GLS      |
| Not defined | sp    | O94973  | AP2A2_HUMAN  | AP-2 complex subunit alpha-2                                                 | AP2A2    |
| Not defined | sp    | O94985  | CSTN1_HUMAN  | Calsyntenin-1                                                                | CLSTN1   |
| Not defined | sp    | O94986  | CEP152_HUMAN | Centrosomal protein of 152 kDa                                               | CEP152   |
| Not defined | sp    | O94988  | FAM13A_HUMAN | Protein FAM13A                                                               | FAM13A   |
| Not defined | sp    | O94992  | HEX11_HUMAN  | Protein HEXIM1                                                               | HEXIM1   |
| Not defined | sp    | O95059  | RPP14_HUMAN  | Ribonuclease P protein subunit p14                                           | RPP14    |
| Not defined | sp    | O95071  | UBR5_HUMAN   | E3 ubiquitin-protein ligase UBR5                                             | UBR5     |
| Not defined | sp    | O95139  | NDUB6_HUMAN  | NADH dehydrogenase [ubiquinone] 1 beta subcomplex subunit 6                  | NDUF6    |
| Not defined | sp    | O95155  | UBE4B_HUMAN  | Ubiquitin conjugation factor E4 B                                            | UBE4B    |
| Not defined | sp    | O95159  | ZFPL1_HUMAN  | Zinc finger protein-like 1                                                   | ZFPL1    |
| Not defined | sp    | O95163  | ELP1_HUMAN   | Elongator complex protein 1                                                  | ELP1     |
| Not defined | sp    | O95164  | UBL3_HUMAN   | Ubiquitin-like protein 3                                                     | UBL3     |
| Not defined | sp    | O95166  | GBRAP_HUMAN  | Gamma-aminobutyric acid receptor-associated protein                          | GABARAP  |
| Not defined | sp    | O95167  | NDUA3_HUMAN  | NADH dehydrogenase [ubiquinone] 1 alpha subcomplex subunit 3                 | NDUF3    |
| Not defined | sp    | O95169  | NDUB8_HUMAN  | NADH dehydrogenase [ubiquinone] 1 beta subcomplex subunit 8, mitochondrial   | NDUF8    |
| Not defined | sp    | O95170  | CDRT1_HUMAN  | CMT1A duplicated region transcript 1 protein                                 | CDRT1    |
| Not defined | sp    | O95178  | NDUB2_HUMAN  | NADH dehydrogenase [ubiquinone] 1 beta subcomplex subunit 2, mitochondrial   | NDUF2    |
| Not defined | sp    | O95182  | NDUA7_HUMAN  | NADH dehydrogenase [ubiquinone] 1 alpha subcomplex subunit 7                 | NDUFA7   |
| Not defined | sp    | O95183  | VAMP5_HUMAN  | Vesicle-associated membrane protein 5                                        | VAMP5    |
| Not defined | sp    | O95185  | UNC5C_HUMAN  | Netrin receptor UNC5C                                                        | UNC5C    |
| Not defined | sp    | O95206  | PCDH8_HUMAN  | Protocadherin-8                                                              | PCDH8    |
| Not defined | sp    | O95208  | EPN2_HUMAN   | Epsin-2                                                                      | EPN2     |
| Not defined | sp    | O95210  | STBD1_HUMAN  | Starch-binding domain-containing protein 1                                   | STBD1    |
| Not defined | sp    | O95232  | LC7L3_HUMAN  | Luc7-like protein 3                                                          | LUC7L3   |
| Not defined | sp    | O95249  | GOSR1_HUMAN  | Golgi SNAP receptor complex member 1                                         | GOSR1    |
| Not defined | sp    | O95260  | ATE1_HUMAN   | Arginyl-tRNA-protein transferase 1                                           | ATE1     |
| Not defined | sp    | O95295  | SNAPN_HUMAN  | SNARE-associated protein Snapin                                              | SNAPIN   |
| Not defined | sp    | O95298  | NDUC2_HUMAN  | NADH dehydrogenase [ubiquinone] 1 subunit C2                                 | NDUFC2   |
| Not defined | sp    | O95299  | NDUAA_HUMAN  | NADH dehydrogenase [ubiquinone] 1 alpha subcomplex subunit 10, mitochondrial | NDUFA10  |
| Not defined | sp    | O95319  | CELF2_HUMAN  | CUGBP Elav-like family member 2                                              | CELF2    |
| Not defined | sp    | O95336  | 6PGL_HUMAN   | 6-phosphogluconolactonase                                                    | PGLS     |
| Not defined | sp    | O95342  | ABCBB_HUMAN  | Bile salt export pump                                                        | ABCB11   |
| Not defined | sp    | O95347  | SMC2_HUMAN   | Structural maintenance of chromosomes protein 2                              | SMC2     |
| Not defined | sp    | O95361  | TRIM16_HUMAN | Tripartite motif-containing protein 16                                       | TRIM16   |
| Not defined | sp    | O95372  | LYPA2_HUMAN  | Acyl-protein thioesterase 2                                                  | LYPA2    |
| Not defined | sp    | O95373  | IPO7_HUMAN   | Importin-7                                                                   | IPO7     |
| Not defined | sp    | O95382  | M3K6_HUMAN   | Mitogen-activated protein kinase kinase kinase 6                             | MAP3K6   |
| Not defined | sp    | O95398  | RPGF3_HUMAN  | Rap guanine nucleotide exchange factor 3                                     | RAPGEF3  |



Supplementary Table 2.xlsx

| Cluster     | class | UNIPROT | UNIPROT_ID   | Description                                                     | GN       |
|-------------|-------|---------|--------------|-----------------------------------------------------------------|----------|
| Not defined | sp    | O95400  | CD2B2_HUMAN  | CD2 antigen cytoplasmic tail-binding protein 2                  | CD2BP2   |
| Not defined | sp    | O95407  | TNFB_HUMAN   | Tumor necrosis factor receptor superfamily member 6B            | TNFRSF6B |
| Not defined | sp    | O95433  | AHSA1_HUMAN  | Activator of 90 kDa heat shock protein ATPase homolog 1         | AHSA1    |
| Not defined | sp    | O95445  | APOM_HUMAN   | Apolipoprotein M                                                | APOM     |
| Not defined | sp    | O95453  | PARN_HUMAN   | Poly(A)-specific ribonuclease PARN                              | PARN     |
| Not defined | sp    | O95456  | PSMG1_HUMAN  | Proteasome assembly chaperone 1                                 | PSMG1    |
| Not defined | sp    | O95470  | SGPL1_HUMAN  | Sphingosine-1-phosphate lyase 1                                 | SGPL1    |
| Not defined | sp    | O95479  | G6PE_HUMAN   | GDH/6PGL endoplasmic bifunctional protein                       | H6PD     |
| Not defined | sp    | O95484  | CLD9_HUMAN   | Claudin-9                                                       | CLDN9    |
| Not defined | sp    | O95486  | SEC24A_HUMAN | Protein transport protein Sec24A                                | SEC24A   |
| Not defined | sp    | O95503  | CBX6_HUMAN   | Chromobox protein homolog 6                                     | CBX6     |
| Not defined | sp    | O95521  | PRAM1_HUMAN  | PRAME family member 1                                           | PRAMEF1  |
| Not defined | sp    | O95551  | TYDP2_HUMAN  | Tyrosyl-DNA phosphodiesterase 2                                 | TD2P     |
| Not defined | sp    | O95562  | SFT2B_HUMAN  | Vesicle transport protein SFT2B                                 | SFT2D2   |
| Not defined | sp    | O95563  | MPC2_HUMAN   | Mitochondrial pyruvate carrier 2                                | MPC2     |
| Not defined | sp    | O95573  | ACSL3_HUMAN  | Long-chain-fatty-acid-CoA ligase 3                              | ACSL3    |
| Not defined | sp    | O95602  | RPA1_HUMAN   | DNA-directed RNA polymerase I subunit RPA1                      | POLR1A   |
| Not defined | sp    | O95613  | PCNT_HUMAN   | Pericentrin                                                     | PCNT     |
| Not defined | sp    | O95619  | YEATS4_HUMAN | YEATS domain-containing protein 4                               | YEATS4   |
| Not defined | sp    | O95628  | CNOT4_HUMAN  | CCR4-NOT transcription complex subunit 4                        | CNOT4    |
| Not defined | sp    | O95684  | FR1OP_HUMAN  | FGFR1 oncogene partner                                          | FGFR1OP  |
| Not defined | sp    | O95685  | PPR3D_HUMAN  | Protein phosphatase 1 regulatory subunit 3D                     | PPP1R3D  |
| Not defined | sp    | O95714  | HERC2_HUMAN  | E3 ubiquitin-protein ligase HERC2                               | HERC2    |
| Not defined | sp    | O95741  | CPNE6_HUMAN  | Copine-6                                                        | CPNE6    |
| Not defined | sp    | O95747  | OXR1_HUMAN   | Serine/threonine-protein kinase OSR1                            | OXR1     |
| Not defined | sp    | O95749  | GGPPS_HUMAN  | Geranylgeranyl pyrophosphate synthase                           | GGPS1    |
| Not defined | sp    | O95772  | STR3N_HUMAN  | STAR3D N-terminal-like protein                                  | STAR3NL  |
| Not defined | sp    | O95786  | DDX58_HUMAN  | Antiviral innate immune response receptor RIG-I                 | DDX58    |
| Not defined | sp    | O95789  | ZMYM6_HUMAN  | Zinc finger MYM-type protein 6                                  | ZMYM6    |
| Not defined | sp    | O95803  | NDST3_HUMAN  | Bifunctional heparan sulfate N-deacetylase/N-sulfotransferase 3 | NDST3    |
| Not defined | sp    | O95810  | CAVIN2_HUMAN | Caveolae-associated protein 2                                   | CAVIN2   |
| Not defined | sp    | O95813  | CER1_HUMAN   | Cerberus                                                        | CER1     |
| Not defined | sp    | O95816  | BAG2_HUMAN   | BAG family molecular chaperone regulator 2                      | BAG2     |
| Not defined | sp    | O95825  | QORL1_HUMAN  | Quinone oxidoreductase-like protein 1                           | CRYZL1   |
| Not defined | sp    | O95834  | EMAL2_HUMAN  | Echinoderm microtubule-associated protein-like 2                | EML2     |
| Not defined | sp    | O95837  | GNA14_HUMAN  | Guanine nucleotide-binding protein subunit alpha-14             | GNA14    |
| Not defined | sp    | O95848  | NUDT14_HUMAN | Uridine diphosphate glucose pyrophosphatase NUDT14              | NUDT14   |
| Not defined | sp    | O95861  | BPNT1_HUMAN  | 3'(2'),5'-bisphosphate nucleotidase 1                           | BPNT1    |
| Not defined | sp    | O95864  | FADS2_HUMAN  | Acyl-CoA 6-desaturase                                           | FADS2    |
| Not defined | sp    | O95865  | DDAH2_HUMAN  | N(G),N(G)-dimethylarginine dimethylaminohydrolase 2             | DDAH2    |
| Not defined | sp    | O95926  | SYF2_HUMAN   | Pre-mRNA-splicing factor SYF2                                   | SYF2     |
| Not defined | sp    | O95947  | TBX6_HUMAN   | T-box transcription factor TBX6                                 | TBX6     |
| Not defined | sp    | O95954  | FTCD_HUMAN   | Formimidoyltransferase-cyclodeaminase                           | FTCD     |
| Not defined | sp    | O95989  | NUDT3_HUMAN  | Diphosphoinositol polyphosphate phosphohydrolase 1              | NUDT3    |
| Not defined | sp    | O95994  | AGR2_HUMAN   | Anterior gradient protein 2 homolog                             | AGR2     |
| Not defined | sp    | O95999  | BCL10_HUMAN  | B-cell lymphoma/leukemia 10                                     | BCL10    |
| Not defined | sp    | O96005  | CLPT1_HUMAN  | Cleft lip and palate transmembrane protein 1                    | CLPTM1   |
| Not defined | sp    | O96007  | MOC2B_HUMAN  | Molybdopterin synthase catalytic subunit                        | MOC2S    |
| Not defined | sp    | P00156  | CYB_HUMAN    | Cytochrome b                                                    | MT-CYB   |
| Not defined | sp    | P00167  | CYB5_HUMAN   | Cytochrome b5                                                   | CYB5A    |
| Not defined | sp    | P00352  | AL1A1_HUMAN  | Retinal dehydrogenase 1                                         | ALDH1A1  |
| Not defined | sp    | P00441  | SODC_HUMAN   | Superoxide dismutase [Cu-Zn]                                    | SOD1     |
| Not defined | sp    | P00738  | HPT_HUMAN    | Haptoglobin                                                     | HP       |
| Not defined | sp    | P00739  | HPTR_HUMAN   | Haptoglobin-related protein                                     | HPR      |
| Not defined | sp    | P00746  | CFAD_HUMAN   | Complement factor D                                             | CFD      |
| Not defined | sp    | P00747  | PLMN_HUMAN   | Plasminogen                                                     | PLG      |
| Not defined | sp    | P00749  | UROK_HUMAN   | Urokinase-type plasminogen activator                            | PLAU     |
| Not defined | sp    | P00750  | TPA_HUMAN    | Tissue-type plasminogen activator                               | PLAT     |
| Not defined | sp    | P00813  | ADA_HUMAN    | Adenosine deaminase                                             | ADA      |
| Not defined | sp    | P00846  | ATP6_HUMAN   | ATP synthase subunit a                                          | MT-ATP6  |
| Not defined | sp    | P00918  | CAH2_HUMAN   | Carbonic anhydrase 2                                            | CA2      |
| Not defined | sp    | P01011  | AACT_HUMAN   | Alpha-1-antichymotrypsin                                        | SERPINA3 |
| Not defined | sp    | P01019  | ANGT_HUMAN   | Angiotensinogen                                                 | AGT      |
| Not defined | sp    | P01033  | TIMP1_HUMAN  | Metalloproteinase inhibitor 1                                   | TIMP1    |
| Not defined | sp    | P01034  | CYTC_HUMAN   | Cystatin-C                                                      | CST3     |
| Not defined | sp    | P01040  | CYTA_HUMAN   | Cystatin-A                                                      | CSTA     |
| Not defined | sp    | P01042  | KNG1_HUMAN   | Kininogen-1                                                     | KNG1     |
| Not defined | sp    | P01130  | LDLR_HUMAN   | Low-density lipoprotein receptor                                | LDLR     |
| Not defined | sp    | P01210  | PENK_HUMAN   | Proenkephalin-A                                                 | PENK     |
| Not defined | sp    | P01583  | IL1A_HUMAN   | Interleukin-1 alpha                                             | IL1A     |
| Not defined | sp    | P01619  | KV320_HUMAN  | Immunoglobulin kappa variable 3-20                              | IGKV3-20 |
| Not defined | sp    | P01717  | LV325_HUMAN  | Immunoglobulin lambda variable 3-25                             | IGLV3-25 |
| Not defined | sp    | P01780  | HV307_HUMAN  | Immunoglobulin heavy variable 3-7                               | IGHV3-7  |
| Not defined | sp    | P01861  | IGHG4_HUMAN  | Immunoglobulin heavy constant gamma 4                           | IGHG4    |
| Not defined | sp    | P01889  | HLA_HUMAN    | HLA class I histocompatibility antigen, B alpha chain           | HLA-B    |
| Not defined | sp    | P02144  | MYG_HUMAN    | Myoglobin                                                       | MB       |
| Not defined | sp    | P02585  | TNNC2_HUMAN  | Troponin C, skeletal muscle                                     | TNNC2    |
| Not defined | sp    | P02655  | APOC2_HUMAN  | Apolipoprotein C-II                                             | APOC2    |
| Not defined | sp    | P02671  | FIBA_HUMAN   | Fibrinogen alpha chain                                          | FGA      |
| Not defined | sp    | P02686  | MBP_HUMAN    | Myelin basic protein                                            | MBP      |
| Not defined | sp    | P02765  | FETUA_HUMAN  | Alpha-2-HS-glycoprotein                                         | AHSG     |
| Not defined | sp    | P02766  | TTHY_HUMAN   | Transferrin                                                     | TTR      |
| Not defined | sp    | P02786  | TFR1_HUMAN   | Transferrin receptor protein 1                                  | TFR1     |
| Not defined | sp    | P02790  | HEMO_HUMAN   | Hemopexin                                                       | HPX      |
| Not defined | sp    | P02792  | FRIL_HUMAN   | Ferritin light chain                                            | FTL      |
| Not defined | sp    | P03928  | ATP8_HUMAN   | ATP synthase protein 8                                          | MT-ATP8  |
| Not defined | sp    | P03952  | KLKB1_HUMAN  | Plasma kallikrein                                               | KLKB1    |
| Not defined | sp    | P03956  | MMP1_HUMAN   | Interstitial collagenase                                        | MMP1     |
| Not defined | sp    | P04003  | C4BPA_HUMAN  | C4b-binding protein alpha chain                                 | C4BPA    |
| Not defined | sp    | P04062  | GLCM_HUMAN   | Lysosomal acid glucosylceramidase                               | GBA      |

Supplementary Table 2.xlsx

| Cluster     | class | UNIPROT | UNIPROT_ID   | Description                                                             | GN       |
|-------------|-------|---------|--------------|-------------------------------------------------------------------------|----------|
| Not defined | sp    | P04066  | FUCO_HUMAN   | Tissue alpha-L-fucosidase                                               | FUCA1    |
| Not defined | sp    | P04156  | PRIO_HUMAN   | Major prion protein                                                     | PRNP     |
| Not defined | sp    | P04216  | THY1_HUMAN   | Thy-1 membrane glycoprotein                                             | THY1     |
| Not defined | sp    | P04424  | ARLY_HUMAN   | Argininosuccinate lyase                                                 | ASL      |
| Not defined | sp    | P04626  | ERBB2_HUMAN  | Receptor tyrosine-protein kinase erbB-2                                 | ERBB2    |
| Not defined | sp    | P04637  | P53_HUMAN    | Cellular tumor antigen p53                                              | TP53     |
| Not defined | sp    | P04844  | RPN2_HUMAN   | Dolichyl-diphosphooligosaccharide-protein glycosyltransferase subunit 2 | RPN2     |
| Not defined | sp    | P04920  | B3A2_HUMAN   | Anion exchange protein 2                                                | SLC4A2   |
| Not defined | sp    | P05090  | APOD_HUMAN   | Apolipoprotein D                                                        | APOD     |
| Not defined | sp    | P05091  | ALDH2_HUMAN  | Aldehyde dehydrogenase, mitochondrial                                   | ALDH2    |
| Not defined | sp    | P05106  | ITB3_HUMAN   | Integrin beta-3                                                         | ITGB3    |
| Not defined | sp    | P05120  | PAI2_HUMAN   | Plasminogen activator inhibitor 2                                       | SERPINB2 |
| Not defined | sp    | P05141  | ADT2_HUMAN   | ADP/ATP translocase 2                                                   | SLC25A5  |
| Not defined | sp    | P05164  | PERM_HUMAN   | Myeloperoxidase                                                         | MPO      |
| Not defined | sp    | P05165  | PCCA_HUMAN   | Propionyl-CoA carboxylase alpha chain, mitochondrial                    | PCCA     |
| Not defined | sp    | P05166  | PCCB_HUMAN   | Propionyl-CoA carboxylase beta chain, mitochondrial                     | PCCB     |
| Not defined | sp    | P05181  | CP2E1_HUMAN  | Cytochrome P450 2E1                                                     | CYP2E1   |
| Not defined | sp    | P05198  | IF2A_HUMAN   | Eukaryotic translation initiation factor 2 subunit 1                    | EIF2S1   |
| Not defined | sp    | P05412  | JUN_HUMAN    | Transcription factor AP-1                                               | JUN      |
| Not defined | sp    | P05549  | AP2A_HUMAN   | Transcription factor AP-2-alpha                                         | TFAP2A   |
| Not defined | sp    | P05937  | CALB1_HUMAN  | Calbindin                                                               | CALB1    |
| Not defined | sp    | P05997  | COL5A2_HUMAN | Collagen alpha-2(V) chain                                               | COL5A2   |
| Not defined | sp    | P06239  | LCK_HUMAN    | Tyrosine-protein kinase Lck                                             | LCK      |
| Not defined | sp    | P06241  | FYN_HUMAN    | Tyrosine-protein kinase Fyn                                             | FYN      |
| Not defined | sp    | P06280  | AGAL_HUMAN   | Alpha-galactosidase A                                                   | GLA      |
| Not defined | sp    | P06400  | RB_HUMAN     | Retinoblastoma-associated protein                                       | RB1      |
| Not defined | sp    | P06454  | PTMA_HUMAN   | Prothymosin alpha                                                       | PTMA     |
| Not defined | sp    | P06493  | CDK1_HUMAN   | Cyclin-dependent kinase 1                                               | CDK1     |
| Not defined | sp    | P06702  | S10A9_HUMAN  | Protein S100-A9                                                         | S100A9   |
| Not defined | sp    | P06727  | APOA4_HUMAN  | Apolipoprotein A-IV                                                     | APOA4    |
| Not defined | sp    | P06732  | KCRM_HUMAN   | Creatine kinase M-type                                                  | CKM      |
| Not defined | sp    | P06746  | DPOLB_HUMAN  | DNA polymerase beta                                                     | POLB     |
| Not defined | sp    | P06756  | ITAV_HUMAN   | Integrin alpha-V                                                        | ITGAV    |
| Not defined | sp    | P06865  | HEXA_HUMAN   | Beta-hexosaminidase subunit alpha                                       | HEXA     |
| Not defined | sp    | P07148  | FABPL_HUMAN  | Fatty acid-binding protein, liver                                       | FABP1    |
| Not defined | sp    | P07196  | NFL_HUMAN    | Neurofilament light polypeptide                                         | NEFL     |
| Not defined | sp    | P07197  | NFM_HUMAN    | Neurofilament medium polypeptide                                        | NEFM     |
| Not defined | sp    | P07199  | CENPB_HUMAN  | Major centromere autoantigen B                                          | CENPB    |
| Not defined | sp    | P07204  | TRBM_HUMAN   | Thrombomodulin                                                          | THBD     |
| Not defined | sp    | P07225  | PROS_HUMAN   | Vitamin K-dependent protein S                                           | PROS1    |
| Not defined | sp    | P07358  | CO8B_HUMAN   | Complement component C8 beta chain                                      | C8B      |
| Not defined | sp    | P07384  | CAN1_HUMAN   | Calpain-1 catalytic subunit                                             | CAPN1    |
| Not defined | sp    | P07585  | PGS2_HUMAN   | Decorin                                                                 | DCN      |
| Not defined | sp    | P07711  | CATL1_HUMAN  | Cathepsin L1                                                            | CTSL     |
| Not defined | sp    | P07738  | PMGE_HUMAN   | Bisphosphoglycerate mutase                                              | BPGM     |
| Not defined | sp    | P07902  | GALT_HUMAN   | Galactose-1-phosphate uridylyltransferase                               | GALT     |
| Not defined | sp    | P07911  | UROM_HUMAN   | Uromodulin                                                              | UMOD     |
| Not defined | sp    | P07919  | OCR6_HUMAN   | Cytochrome b-c1 complex subunit 6, mitochondrial                        | UQCQRH   |
| Not defined | sp    | P07947  | YES_HUMAN    | Tyrosine-protein kinase Yes                                             | YES1     |
| Not defined | sp    | P07948  | LYN_HUMAN    | Tyrosine-protein kinase Lyn                                             | LYN      |
| Not defined | sp    | P08048  | ZFY_HUMAN    | Zinc finger Y-chromosomal protein                                       | ZFY      |
| Not defined | sp    | P08069  | IGF1R_HUMAN  | Insulin-like growth factor 1 receptor                                   | IGF1R    |
| Not defined | sp    | P08133  | ANXA6_HUMAN  | Annexin A6                                                              | ANXA6    |
| Not defined | sp    | P08236  | BGLR_HUMAN   | Beta-glucuronidase                                                      | GUSB     |
| Not defined | sp    | P08237  | PFKAM_HUMAN  | ATP-dependent 6-phosphofructokinase, muscle type                        | PFKM     |
| Not defined | sp    | P08240  | SRPRA_HUMAN  | Signal recognition particle receptor subunit alpha                      | SRPRA    |
| Not defined | sp    | P08243  | ASNS_HUMAN   | Asparagine synthetase [glutamine-hydrolyzing]                           | ASNS     |
| Not defined | sp    | P08253  | MMP2_HUMAN   | 72 kDa type IV collagenase                                              | MMP2     |
| Not defined | sp    | P08254  | MMP3_HUMAN   | Stromelysin-1                                                           | MMP3     |
| Not defined | sp    | P08397  | HEM3_HUMAN   | Prophobilinogen deaminase                                               | HMB3     |
| Not defined | sp    | P08473  | NEP_HUMAN    | Nephrilysin                                                             | MME      |
| Not defined | sp    | P08476  | INHBA_HUMAN  | Inhibin beta A chain                                                    | INHBA    |
| Not defined | sp    | P08571  | CD14_HUMAN   | Monocyte differentiation antigen CD14                                   | CD14     |
| Not defined | sp    | P08572  | COL4A2_HUMAN | Collagen alpha-2(V) chain                                               | COL4A2   |
| Not defined | sp    | P08575  | PTPRC_HUMAN  | Receptor-type tyrosine-protein phosphatase C                            | PTPRC    |
| Not defined | sp    | P08581  | MET_HUMAN    | Hepatocyte growth factor receptor                                       | MET      |
| Not defined | sp    | P08582  | TRFM_HUMAN   | Melanotransferrin                                                       | MELTF    |
| Not defined | sp    | P08603  | CFAH_HUMAN   | Complement factor H                                                     | CFH      |
| Not defined | sp    | P08631  | HCK_HUMAN    | Tyrosine-protein kinase HCK                                             | HCK      |
| Not defined | sp    | P08648  | ITGA5_HUMAN  | Integrin alpha-5                                                        | ITGA5    |
| Not defined | sp    | P08651  | NFIC_HUMAN   | Nuclear factor 1 C-type                                                 | NFIC     |
| Not defined | sp    | P08670  | VIME_HUMAN   | Vimentin                                                                | VIM      |
| Not defined | sp    | P09001  | RM03_HUMAN   | 39S ribosomal protein L3, mitochondrial                                 | MRPL3    |
| Not defined | sp    | P09038  | FGF2_HUMAN   | Fibroblast growth factor 2                                              | FGF2     |
| Not defined | sp    | P09086  | PO2F2_HUMAN  | POU domain, class 2, transcription factor 2                             | POU2F2   |
| Not defined | sp    | P09110  | THIK_HUMAN   | 3-ketoacyl-CoA thiolase, peroxisomal                                    | ACAA1    |
| Not defined | sp    | P09132  | SRP19_HUMAN  | Signal recognition particle 19 kDa protein                              | SRP19    |
| Not defined | sp    | P09238  | MMP10_HUMAN  | Stromelysin-2                                                           | MMP10    |
| Not defined | sp    | P09417  | DHPR_HUMAN   | Dihydropteridine reductase                                              | QDPR     |
| Not defined | sp    | P09455  | RET1_HUMAN   | Retinol-binding protein 1                                               | RBP1     |
| Not defined | sp    | P09467  | F16P1_HUMAN  | Fructose-1,6-bisphosphatase 1                                           | FBP1     |
| Not defined | sp    | P09488  | GSTM1_HUMAN  | Glutathione S-transferase Mu 1                                          | GSTM1    |
| Not defined | sp    | P09497  | CLCB_HUMAN   | Clathrin light chain B                                                  | CLTB     |
| Not defined | sp    | P09601  | HMOX1_HUMAN  | Heme oxygenase 1                                                        | HMOX1    |
| Not defined | sp    | P09603  | CSF1_HUMAN   | Macrophage colony-stimulating factor 1                                  | CSF1     |
| Not defined | sp    | P09668  | CATH_HUMAN   | Pro-cathepsin H                                                         | CTSH     |
| Not defined | sp    | P09758  | TACD2_HUMAN  | Tumor-associated calcium signal transducer 2                            | TACSD2   |
| Not defined | sp    | P09769  | FGR_HUMAN    | Tyrosine-protein kinase Fgr                                             | FGR      |
| Not defined | sp    | P09884  | DPOLA_HUMAN  | DNA polymerase alpha catalytic subunit                                  | POLA1    |
| Not defined | sp    | P09913  | IFIT2_HUMAN  | Interferon-induced protein with tetratricopeptide repeats 2             | IFIT2    |

Supplementary Table 2.xlsx

| Cluster     | class | UNIPROT | UNIPROT_ID  | Description                                                                                                | GN             |
|-------------|-------|---------|-------------|------------------------------------------------------------------------------------------------------------|----------------|
| Not defined | sp    | P09914  | IFIT1_HUMAN | Interferon-induced protein with tetratricopeptide repeats 1                                                | IFIT1          |
| Not defined | sp    | P0C221  | CC175_HUMAN | Coiled-coil domain-containing protein 175                                                                  | CCDC175        |
| Not defined | sp    | P0C870  | JMJD7_HUMAN | Bifunctional peptidase and (3S)-lysyl hydroxylase JMJD7                                                    | JMJD7          |
| Not defined | sp    | P0CAP1  | MYZAP_HUMAN | Myocardial zonula adherens protein                                                                         | MYZAP          |
| Not defined | sp    | P0CAP2  | GRL1A_HUMAN | DNA-directed RNA polymerase II subunit GRINL1A                                                             | POLR2M         |
| Not defined | sp    | P0CB47  | UBFL1_HUMAN | Upstream-binding factor 1-like protein 1                                                                   | UBTFL1         |
| Not defined | sp    | P0CG12  | DERPC_HUMAN | Decreased expression in renal and prostate cancer protein                                                  | DERPC          |
| Not defined | sp    | P0CG22  | DR4L1_HUMAN | Putative dehydrogenase/reductase SDR family member 4-like 1                                                | DHRS4L1        |
| Not defined | sp    | P0CG29  | GST2_HUMAN  | Glutathione S-transferase theta-2                                                                          | GSTT2          |
| Not defined | sp    | P0CG30  | GSTT2_HUMAN | Glutathione S-transferase theta-2B                                                                         | GSTT2B         |
| Not defined | sp    | P0CH98  | F106C_HUMAN | Protein FAM106C                                                                                            | FAM106C        |
| Not defined | sp    | P0CJ78  | ZN865_HUMAN | Zinc finger protein 865                                                                                    | ZN865          |
| Not defined | sp    | P0CL80  | GG12F_HUMAN | G antigen 12F                                                                                              | GAGE12F        |
| Not defined | sp    | P0CL81  | GG12G_HUMAN | G antigen 12G                                                                                              | GAGE12G        |
| Not defined | sp    | P0CL82  | GG12I_HUMAN | G antigen 12I                                                                                              | GAGE12I        |
| Not defined | sp    | P0DI81  | TPC2A_HUMAN | Trafficking protein particle complex subunit 2                                                             | TRAPP2         |
| Not defined | sp    | P0DI82  | TPC2B_HUMAN | Trafficking protein particle complex subunit 2B                                                            | TRAPP2B        |
| Not defined | sp    | P0DJ07  | PT100_HUMAN | Protein PET100 homolog, mitochondrial                                                                      | PET100         |
| Not defined | sp    | P0DJD0  | RGPD1_HUMAN | RANBP2-like and GRIP domain-containing protein 1                                                           | RGPD1          |
| Not defined | sp    | P0DJD4  | RBV1C_HUMAN | RNA-binding motif protein, Y chromosome, family 1 member C                                                 | RBMY1C         |
| Not defined | sp    | P0DM63  | NPIA8_HUMAN | Nuclear pore complex-interacting protein family member A8                                                  | NPIA8          |
| Not defined | sp    | P0DMV9  | ST1A3_HUMAN | Sulfotransferase 1A3                                                                                       | SULT1A3        |
| Not defined | sp    | P0DMN0  | ST1A4_HUMAN | Sulfotransferase 1A4                                                                                       | SULT1A4        |
| Not defined | sp    | P0DMQ9  | CH089_HUMAN | Putative uncharacterized protein C8orf89                                                                   | C8orf89        |
| Not defined | sp    | P0DN79  | CBSL_HUMAN  | Cystathionine beta-synthase-like protein                                                                   | CBSL           |
| Not defined | sp    | P0DP58  | LYNX1_HUMAN | Ly-6/neurotoxin-like protein 1                                                                             | LYNX1          |
| Not defined | sp    | P0DP86  | RPAC2_HUMAN | DNA-directed RNA polymerases I and III subunit RPAC2                                                       | POLR1D         |
| Not defined | sp    | P0DPD7  | EFMT4_HUMAN | EEF1A lysine methyltransferase 4                                                                           | EEF1AKMT4      |
| Not defined | sp    | P0DPD8  | EFCE2_HUMAN | EEF1AKMT4-ECE2 readthrough transcript protein                                                              | EEF1AKMT4-ECE2 |
| Not defined | sp    | P0DPI3  | CENL2_HUMAN | Centromere protein V-like protein 2                                                                        | CENPLV2        |
| Not defined | sp    | P10074  | TZAP_HUMAN  | Telomere zinc finger-associated protein                                                                    | ZBTB48         |
| Not defined | sp    | P10109  | ADX_HUMAN   | Adrenodoxin, mitochondrial                                                                                 | FDX1           |
| Not defined | sp    | P10155  | RO60_HUMAN  | 60 kDa SS-A/Ro ribonucleoprotein                                                                           | RO60           |
| Not defined | sp    | P10301  | RRAS_HUMAN  | Ras-related protein R-Ras                                                                                  | RRAS           |
| Not defined | sp    | P10586  | PTPRF_HUMAN | Receptor-type tyrosine-protein phosphatase F                                                               | PTPRF          |
| Not defined | sp    | P10620  | MGST1_HUMAN | Microsomal glutathione S-transferase 1                                                                     | MGST1          |
| Not defined | sp    | P10636  | TAU_HUMAN   | Microtubule-associated protein tau                                                                         | MAPT           |
| Not defined | sp    | P10644  | KAP0_HUMAN  | cAMP-dependent protein kinase type I-alpha regulatory subunit                                              | PRKAR1A        |
| Not defined | sp    | P10646  | TFPI1_HUMAN | Tissue factor pathway inhibitor                                                                            | TFPI           |
| Not defined | sp    | P10915  | HPLN1_HUMAN | Hyaluronan and proteoglycan link protein 1                                                                 | HAPLN1         |
| Not defined | sp    | P10916  | MLRV_HUMAN  | Myosin regulatory light chain 2, ventricular/cardiac muscle isoform                                        | MYL2           |
| Not defined | sp    | P11117  | PPAL_HUMAN  | Lysosomal acid phosphatase                                                                                 | ACP2           |
| Not defined | sp    | P11137  | MTAP2_HUMAN | Microtubule-associated protein 2                                                                           | MAP2           |
| Not defined | sp    | P11166  | GTR1_HUMAN  | Solute carrier family 2, facilitated glucose transporter member 1                                          | SLC2A1         |
| Not defined | sp    | P11169  | GTR3_HUMAN  | Solute carrier family 2, facilitated glucose transporter member 3                                          | SLC2A3         |
| Not defined | sp    | P11172  | UMPS_HUMAN  | Uridine 5'-monophosphate synthase                                                                          | UMPS           |
| Not defined | sp    | P11182  | ODD2_HUMAN  | Lipoamide acyltransferase component of branched-chain alpha-keto acid dehydrogenase complex, mitochondrial | DBT            |
| Not defined | sp    | P11215  | ITAM_HUMAN  | Integrin alpha-M                                                                                           | ITGAM          |
| Not defined | sp    | P11217  | PYGM_HUMAN  | Glycogen phosphorylase, muscle form                                                                        | PYGM           |
| Not defined | sp    | P11234  | RALB_HUMAN  | Ras-related protein Ral-B                                                                                  | RALB           |
| Not defined | sp    | P11277  | SPTB1_HUMAN | Spectrin beta chain, erythrocytic                                                                          | SPTB           |
| Not defined | sp    | P11308  | ERG_HUMAN   | Transcriptional regulator ERG                                                                              | ERG            |
| Not defined | sp    | P11310  | ACADM_HUMAN | Medium-chain specific acyl-CoA dehydrogenase, mitochondrial                                                | ACADM          |
| Not defined | sp    | P11362  | FGFR1_HUMAN | Fibroblast growth factor receptor 1                                                                        | FGFR1          |
| Not defined | sp    | P11387  | TOP1_HUMAN  | DNA topoisomerase 1                                                                                        | TOP1           |
| Not defined | sp    | P11388  | TOP2A_HUMAN | DNA topoisomerase 2-alpha                                                                                  | TOP2A          |
| Not defined | sp    | P11487  | FGF3_HUMAN  | Fibroblast growth factor 3                                                                                 | FGF3           |
| Not defined | sp    | P11498  | PYC_HUMAN   | Pyruvate carboxylase, mitochondrial                                                                        | PC             |
| Not defined | sp    | P11532  | DMD_HUMAN   | Dystrophin                                                                                                 | DMD            |
| Not defined | sp    | P11586  | C1TC_HUMAN  | C-1-tetrahydrofolate synthase, cytoplasmic                                                                 | MTHFD1         |
| Not defined | sp    | P11678  | PERE_HUMAN  | Eosinophil peroxidase                                                                                      | EPX            |
| Not defined | sp    | P11766  | ADHX_HUMAN  | Alcohol dehydrogenase class-3                                                                              | ADH5           |
| Not defined | sp    | P11802  | CDK4_HUMAN  | Cyclin-dependent kinase 4                                                                                  | CDK4           |
| Not defined | sp    | P12036  | NFH_HUMAN   | Neurofilament heavy polypeptide                                                                            | NEFH           |
| Not defined | sp    | P12074  | CX6A1_HUMAN | Cytochrome c oxidase subunit 6A1, mitochondrial                                                            | COX6A1         |
| Not defined | sp    | P12107  | COBA1_HUMAN | Collagen alpha-1(XI) chain                                                                                 | COL11A1        |
| Not defined | sp    | P12110  | CO6A2_HUMAN | Collagen alpha-2(VI) chain                                                                                 | COL6A2         |
| Not defined | sp    | P12235  | ADT1_HUMAN  | ADP/ATP translocase 1                                                                                      | SLC25A4        |
| Not defined | sp    | P12236  | ADT3_HUMAN  | ADP/ATP translocase 3                                                                                      | SLC25A6        |
| Not defined | sp    | P12273  | PIP_HUMAN   | Prolactin-inducible protein                                                                                | PIP            |
| Not defined | sp    | P12277  | KCRB_HUMAN  | Creatine kinase B-type                                                                                     | CKB            |
| Not defined | sp    | P12429  | ANXA3_HUMAN | Annexin A3                                                                                                 | ANXA3          |
| Not defined | sp    | P12645  | BMP3_HUMAN  | Bone morphogenetic protein 3                                                                               | BMP3           |
| Not defined | sp    | P12694  | ODBA_HUMAN  | 2-oxoisovalerate dehydrogenase subunit alpha, mitochondrial                                                | BCKDHA         |
| Not defined | sp    | P12821  | ACE_HUMAN   | Angiotensin-converting enzyme                                                                              | ACE            |
| Not defined | sp    | P13010  | XRCC5_HUMAN | X-ray repair cross-complementing protein 5                                                                 | XRCC5          |
| Not defined | sp    | P13284  | GILT_HUMAN  | Gamma-interferon-inducible lysosomal thiol reductase                                                       | IFI30          |
| Not defined | sp    | P13378  | HXD8_HUMAN  | Homeobox protein Hox-D8                                                                                    | HOXD8          |
| Not defined | sp    | P13521  | SCG2_HUMAN  | Secretogranin-2                                                                                            | SCG2           |
| Not defined | sp    | P13591  | NCAM1_HUMAN | Neural cell adhesion molecule 1                                                                            | NCAM1          |
| Not defined | sp    | P13598  | ICAM2_HUMAN | Intercellular adhesion molecule 2                                                                          | ICAM2          |
| Not defined | sp    | P13611  | CSPG2_HUMAN | Versican core protein                                                                                      | VCAN           |
| Not defined | sp    | P13671  | CO6_HUMAN   | Complement component C6                                                                                    | C6             |
| Not defined | sp    | P13688  | CEAM1_HUMAN | Carcinoembryonic antigen-related cell adhesion molecule 1                                                  | CEACAM1        |
| Not defined | sp    | P13716  | HEM2_HUMAN  | Delta-aminolevulinic acid dehydratase                                                                      | ALAD           |
| Not defined | sp    | P13726  | TF_HUMAN    | Tissue factor                                                                                              | F3             |
| Not defined | sp    | P13747  | HLA_E_HUMAN | HLA class I histocompatibility antigen, alpha chain E                                                      | HLA-E          |
| Not defined | sp    | P13796  | PLSL_HUMAN  | Plastin-2                                                                                                  | LCP1           |
| Not defined | sp    | P13807  | GYS1_HUMAN  | Glycogen [starch] synthase, muscle                                                                         | GYS1           |
| Not defined | sp    | P13928  | ANXA8_HUMAN | Annexin A8                                                                                                 | ANXA8          |

Supplementary Table 2.xlsx

| Cluster     | class | UNIPROT | UNIPROT_ID   | Description                                                       | GN       |
|-------------|-------|---------|--------------|-------------------------------------------------------------------|----------|
| Not defined | sp    | P13987  | CD59_HUMAN   | CD59 glycoprotein                                                 | CD59     |
| Not defined | sp    | P14136  | GFAP_HUMAN   | Glial fibrillary acidic protein                                   | GFAP     |
| Not defined | sp    | P14209  | CD99_HUMAN   | CD99 antigen                                                      | CD99     |
| Not defined | sp    | P14317  | HCLS1_HUMAN  | Hematopoietic lineage cell-specific protein                       | HCLS1    |
| Not defined | sp    | P14324  | FPPS_HUMAN   | Farnesyl pyrophosphate synthase                                   | FDPS     |
| Not defined | sp    | P14384  | CBPM_HUMAN   | Carboxypeptidase M                                                | CPM      |
| Not defined | sp    | P14410  | SUIS_HUMAN   | Sucrase-isomaltase, intestinal                                    | SI       |
| Not defined | sp    | P14543  | NID1_HUMAN   | Nidogen-1                                                         | NID1     |
| Not defined | sp    | P14621  | ACYP2_HUMAN  | Acylphosphatase-2                                                 | ACYP2    |
| Not defined | sp    | P14635  | CCNB1_HUMAN  | G2/mitotic-specific cyclin-B1                                     | CCNB1    |
| Not defined | sp    | P14735  | IDE_HUMAN    | Insulin-degrading enzyme                                          | IDE      |
| Not defined | sp    | P14854  | CX6B1_HUMAN  | Cytochrome c oxidase subunit 6B1                                  | COX6B1   |
| Not defined | sp    | P14859  | PO2F1_HUMAN  | POU domain, class 2, transcription factor 1                       | POU2F1   |
| Not defined | sp    | P14868  | SYDC_HUMAN   | Aspartate-tRNA ligase, cytoplasmic                                | DARS1    |
| Not defined | sp    | P14923  | PLAK_HUMAN   | Junction plakoglobin                                              | JUP      |
| Not defined | sp    | P15104  | GLNA_HUMAN   | Glutamine synthetase                                              | GLUL     |
| Not defined | sp    | P15144  | AMPN_HUMAN   | Aminopeptidase N                                                  | ANPEP    |
| Not defined | sp    | P15151  | PVR_HUMAN    | Poliiovirus receptor                                              | PVR      |
| Not defined | sp    | P15289  | ARSA_HUMAN   | Arylsulfatase A                                                   | ARSA     |
| Not defined | sp    | P15291  | B4GT1_HUMAN  | Beta-1,4-galactosyltransferase 1                                  | B4GALT1  |
| Not defined | sp    | P15313  | VATB1_HUMAN  | V-type proton ATPase subunit B, kidney isoform                    | ATP6V1B1 |
| Not defined | sp    | P15408  | FOSL2_HUMAN  | Fos-related antigen 2                                             | FOSL2    |
| Not defined | sp    | P15428  | PGDH_HUMAN   | 15-hydroxyprostaglandin dehydrogenase [NAD(+)]                    | HPGD     |
| Not defined | sp    | P15529  | MCP_HUMAN    | Membrane cofactor protein                                         | CD46     |
| Not defined | sp    | P15559  | NQO1_HUMAN   | NAD(P)H dehydrogenase [quinone] 1                                 | NQO1     |
| Not defined | sp    | P15822  | ZEP1_HUMAN   | Zinc finger protein 40                                            | HIVEP1   |
| Not defined | sp    | P15848  | ARSB_HUMAN   | Arylsulfatase B                                                   | ARSB     |
| Not defined | sp    | P15880  | RS2_HUMAN    | 40S ribosomal protein S2                                          | RPS2     |
| Not defined | sp    | P15884  | ITF2_HUMAN   | Transcription factor 4                                            | TCF4     |
| Not defined | sp    | P15918  | RAG1_HUMAN   | V(D)J recombination-activating protein 1                          | RAG1     |
| Not defined | sp    | P15923  | TFE2_HUMAN   | Transcription factor E2-alpha                                     | TCF3     |
| Not defined | sp    | P15924  | DESP_HUMAN   | Desmoplakin                                                       | DSP      |
| Not defined | sp    | P15976  | GATA1_HUMAN  | Erythroid transcription factor                                    | GATA1    |
| Not defined | sp    | P16035  | TIMP2_HUMAN  | Metalloproteinase inhibitor 2                                     | TIMP2    |
| Not defined | sp    | P16083  | NQO2_HUMAN   | Ribosylidihyronicotinamide dehydrogenase [quinone]                | NQO2     |
| Not defined | sp    | P16118  | F261_HUMAN   | 6-phosphofructo-2-kinase/fructose-2,6-bisphosphatase 1            | PFKFB1   |
| Not defined | sp    | P16144  | ITGB4_HUMAN  | Integrin beta-4                                                   | ITGB4    |
| Not defined | sp    | P16219  | ACADS_HUMAN  | Short-chain specific acyl-CoA dehydrogenase, mitochondrial        | ACADS    |
| Not defined | sp    | P16220  | CREB1_HUMAN  | Cyclic AMP-responsive element-binding protein 1                   | CREB1    |
| Not defined | sp    | P16234  | PGFRA_HUMAN  | Platelet-derived growth factor receptor alpha                     | PDGFRA   |
| Not defined | sp    | P16333  | NCK1_HUMAN   | Cytoplasmic protein NCK1                                          | NCK1     |
| Not defined | sp    | P16383  | GCFC2_HUMAN  | GC-rich sequence DNA-binding factor 2                             | GCFC2    |
| Not defined | sp    | P16422  | EPCAM_HUMAN  | Epithelial cell adhesion molecule                                 | EPCAM    |
| Not defined | sp    | P16435  | NCPR_HUMAN   | NADPH-cytochrome P450 reductase                                   | POR      |
| Not defined | sp    | P16455  | MGMT_HUMAN   | Methylated-DNA-protein-cysteine methyltransferase                 | MGMT     |
| Not defined | sp    | P16520  | GBB3_HUMAN   | Guanine nucleotide-binding protein G(I)/G(S)/G(T) subunit beta-3  | GNB3     |
| Not defined | sp    | P16615  | AT2A2_HUMAN  | Sarcoplasmic/endoplasmic reticulum calcium ATPase 2               | ATP2A2   |
| Not defined | sp    | P17010  | ZFX_HUMAN    | Zinc finger X-chromosomal protein                                 | ZFX      |
| Not defined | sp    | P17029  | ZKSC1_HUMAN  | Zinc finger protein with KRAB and SCAN domains 1                  | ZKSCAN1  |
| Not defined | sp    | P17032  | ZNF37A_HUMAN | Zinc finger protein 37A                                           | ZNF37A   |
| Not defined | sp    | P17050  | NAGAB_HUMAN  | Alpha-N-acetylgalactosaminidase                                   | NAGA     |
| Not defined | sp    | P17098  | ZNF8_HUMAN   | Zinc finger protein 8                                             | ZNF8     |
| Not defined | sp    | P17213  | BPI_HUMAN    | Bactericidal permeability-increasing protein                      | BPI      |
| Not defined | sp    | P17275  | JUNB_HUMAN   | Transcription factor jun-B                                        | JUNB     |
| Not defined | sp    | P17480  | UBF1_HUMAN   | Nucleolar transcription factor 1                                  | UBTF     |
| Not defined | sp    | P17483  | HXB4_HUMAN   | Homeobox protein Hox-B4                                           | HOXB4    |
| Not defined | sp    | P17516  | AKR1C4_HUMAN | Aldo-keto reductase family 1 member C4                            | AKR1C4   |
| Not defined | sp    | P17540  | KCRS_HUMAN   | Creatine kinase S-type, mitochondrial                             | CKMT2    |
| Not defined | sp    | P17568  | NDU87_HUMAN  | NADH dehydrogenase [ubiquinone] 1 beta subcomplex subunit 7       | NDUFB7   |
| Not defined | sp    | P17612  | KAPCA_HUMAN  | cAMP-dependent protein kinase catalytic subunit alpha             | PRKACA   |
| Not defined | sp    | P17655  | CAN2_HUMAN   | Calpain-2 catalytic subunit                                       | CAPN2    |
| Not defined | sp    | P17661  | DESM_HUMAN   | Desmin                                                            | DES      |
| Not defined | sp    | P17676  | CEBPB_HUMAN  | CCAAT/enhancer-binding protein beta                               | CEBPB    |
| Not defined | sp    | P17693  | HLA_G_HUMAN  | HLA class I histocompatibility antigen, alpha chain G             | HLA-G    |
| Not defined | sp    | P17706  | PTN2_HUMAN   | Tyrosine-protein phosphatase non-receptor type 2                  | PTPN2    |
| Not defined | sp    | P17812  | PYRG1_HUMAN  | CTP synthase 1                                                    | CTPS1    |
| Not defined | sp    | P17813  | EGLN_HUMAN   | Endoglin                                                          | ENG      |
| Not defined | sp    | P17844  | DDX5_HUMAN   | Probable ATP-dependent RNA helicase DDX5                          | DDX5     |
| Not defined | sp    | P17858  | PFKAL_HUMAN  | ATP-dependent 6-phosphofructokinase, liver type                   | PFKL     |
| Not defined | sp    | P17900  | SAP3_HUMAN   | Ganglioside GM2 activator                                         | GM2A     |
| Not defined | sp    | P17948  | VGFR1_HUMAN  | Vascular endothelial growth factor receptor 1                     | FLT1     |
| Not defined | sp    | P17987  | TCPA_HUMAN   | T-complex protein 1 subunit alpha                                 | TCP1     |
| Not defined | sp    | P18084  | ITB5_HUMAN   | Integrin beta-5                                                   | ITGB5    |
| Not defined | sp    | P18283  | GPX2_HUMAN   | Glutathione peroxidase 2                                          | GPX2     |
| Not defined | sp    | P18433  | PTPRA_HUMAN  | Receptor-type tyrosine-protein phosphatase alpha                  | PTPRA    |
| Not defined | sp    | P18510  | IL1RA_HUMAN  | Interleukin-1 receptor antagonist protein                         | IL1RN    |
| Not defined | sp    | P18583  | SON_HUMAN    | Protein SON                                                       | SON      |
| Not defined | sp    | P18621  | RL17_HUMAN   | 60S ribosomal protein L17                                         | RPL17    |
| Not defined | sp    | P18846  | ATF1_HUMAN   | Cyclic AMP-dependent transcription factor ATF-1                   | ATF1     |
| Not defined | sp    | P18887  | XRCC1_HUMAN  | DNA repair protein XRCC1                                          | XRCC1    |
| Not defined | sp    | P19021  | AMD_HUMAN    | Peptidyl-glycine alpha-amidating monoxygenase                     | PAM      |
| Not defined | sp    | P19022  | CADH2_HUMAN  | Cadherin-2                                                        | CDH2     |
| Not defined | sp    | P19174  | PLCG1_HUMAN  | 1-phosphatidylinositol 4,5-bisphosphate phosphodiesterase gamma-1 | PLCG1    |
| Not defined | sp    | P19320  | VCAM1_HUMAN  | Vascular cell adhesion protein 1                                  | VCAM1    |
| Not defined | sp    | P19367  | HXK1_HUMAN   | Hexokinase-1                                                      | HK1      |
| Not defined | sp    | P19387  | RPB3_HUMAN   | DNA-directed RNA polymerase II subunit RPB3                       | POLR2C   |
| Not defined | sp    | P19438  | TNFR1A_HUMAN | Tumor necrosis factor receptor superfamily member 1A              | TNFRSF1A |
| Not defined | sp    | P19440  | GGT1_HUMAN   | Glutathione hydrolase 1 proenzyme                                 | GGT1     |
| Not defined | sp    | P19474  | ROS2_HUMAN   | E3 ubiquitin-protein ligase TRIM21                                | TRIM21   |
| Not defined | sp    | P19484  | TFEB_HUMAN   | Transcription factor EB                                           | TFEB     |

Supplementary Table 2.xlsx

| Cluster     | class | UNIPROT | UNIPROT_ID  | Description                                                            | GN       |
|-------------|-------|---------|-------------|------------------------------------------------------------------------|----------|
| Not defined | sp    | P19525  | E2AK2_HUMAN | Interferon-induced, double-stranded RNA-activated protein kinase       | EIF2AK2  |
| Not defined | sp    | P19532  | TFE3_HUMAN  | Transcription factor E3                                                | TFE3     |
| Not defined | sp    | P19793  | RXRA_HUMAN  | Retinoic acid receptor RXR-alpha                                       | RXRA     |
| Not defined | sp    | P19838  | NFKB1_HUMAN | Nuclear factor NF-kappa-B p105 subunit                                 | NFKB1    |
| Not defined | sp    | P19883  | FST_HUMAN   | Follistatin                                                            | FST      |
| Not defined | sp    | P19971  | TYPH_HUMAN  | Thymidine phosphorylase                                                | TYMP     |
| Not defined | sp    | P20020  | AT2B1_HUMAN | Plasma membrane calcium-transporting ATPase 1                          | ATP2B1   |
| Not defined | sp    | P20042  | IF2B_HUMAN  | Eukaryotic translation initiation factor 2 subunit 2                   | EIF2S2   |
| Not defined | sp    | P20061  | TCO1_HUMAN  | Transcobalamin-1                                                       | TCN1     |
| Not defined | sp    | P20062  | TCO2_HUMAN  | Transcobalamin-2                                                       | TCN2     |
| Not defined | sp    | P20585  | MSH3_HUMAN  | DNA mismatch repair protein Msh3                                       | MSH3     |
| Not defined | sp    | P20591  | MX1_HUMAN   | Interferon-induced GTP-binding protein Mx1                             | MX1      |
| Not defined | sp    | P20648  | ATP4A_HUMAN | Potassium-transporting ATPase alpha chain 1                            | ATP4A    |
| Not defined | sp    | P20794  | MAK_HUMAN   | Serine/threonine-protein kinase MAK                                    | MAK      |
| Not defined | sp    | P20809  | IL11_HUMAN  | Interleukin-11                                                         | IL11     |
| Not defined | sp    | P20813  | CP2B6_HUMAN | Cytochrome P450 2B6                                                    | CYP2B6   |
| Not defined | sp    | P20823  | HNF1A_HUMAN | Hepatocyte nuclear factor 1-alpha                                      | HNF1A    |
| Not defined | sp    | P20930  | FILA_HUMAN  | Filaggrin                                                              | FLG      |
| Not defined | sp    | P21127  | CD11B_HUMAN | Cyclin-dependent kinase 11B                                            | CDK11B   |
| Not defined | sp    | P21217  | FUT3_HUMAN  | Galactoside 3(4)-L-fucosyltransferase                                  | FUT3     |
| Not defined | sp    | P21266  | GSTM3_HUMAN | Glutathione S-transferase Mu 3                                         | GSTM3    |
| Not defined | sp    | P21281  | VATB2_HUMAN | V-type proton ATPase subunit B, brain isoform                          | ATP6V1B2 |
| Not defined | sp    | P21359  | NF1_HUMAN   | Neurofibromin                                                          | NF1      |
| Not defined | sp    | P21397  | AOFA_HUMAN  | Amine oxidase [flavin-containing] A                                    | MAOA     |
| Not defined | sp    | P21399  | ACOC_HUMAN  | Cytoplasmic aconitate hydratase                                        | ACO1     |
| Not defined | sp    | P21579  | SYT1_HUMAN  | Synaptotagmin-1                                                        | SYT1     |
| Not defined | sp    | P21589  | 5NTD_HUMAN  | 5'-nucleotidase                                                        | NT5E     |
| Not defined | sp    | P21675  | TAF1_HUMAN  | Transcription initiation factor TFIID subunit 1                        | TAF1     |
| Not defined | sp    | P21802  | FGFR2_HUMAN | Fibroblast growth factor receptor 2                                    | FGFR2    |
| Not defined | sp    | P21817  | RYR1_HUMAN  | Ryanodine receptor 1                                                   | RYR1     |
| Not defined | sp    | P21860  | ERBB3_HUMAN | Receptor tyrosine-protein kinase erbB-3                                | ERBB3    |
| Not defined | sp    | P21964  | COMT_HUMAN  | Catechol O-methyltransferase                                           | COMT     |
| Not defined | sp    | P22033  | MUTA_HUMAN  | Methylmalonyl-CoA mutase, mitochondrial                                | MMUT     |
| Not defined | sp    | P22059  | OSBP1_HUMAN | Oxysterol-binding protein 1                                            | OSBP     |
| Not defined | sp    | P22087  | FBRL_HUMAN  | rRNA 2'-O-methyltransferase fibrillar                                  | FBL      |
| Not defined | sp    | P22090  | RS4Y1_HUMAN | 40S ribosomal protein S4, Y isoform 1                                  | RPS4Y1   |
| Not defined | sp    | P22102  | PUR2_HUMAN  | Trifunctional purine biosynthetic protein adenosine-3                  | GART     |
| Not defined | sp    | P22223  | CADH3_HUMAN | Cadherin-3                                                             | CDH3     |
| Not defined | sp    | P22303  | ACES_HUMAN  | Acetylcholinesterase                                                   | ACHE     |
| Not defined | sp    | P22413  | ENPP1_HUMAN | Ectonucleotide pyrophosphatase/phosphodiesterase family member 1       | ENPP1    |
| Not defined | sp    | P22455  | FGFR4_HUMAN | Fibroblast growth factor receptor 4                                    | FGFR4    |
| Not defined | sp    | P22570  | ADRO_HUMAN  | NADPH:adenodoxin oxidoreductase, mitochondrial                         | FDXR     |
| Not defined | sp    | P22607  | FGFR3_HUMAN | Fibroblast growth factor receptor 3                                    | FGFR3    |
| Not defined | sp    | P22676  | CALB2_HUMAN | Calretinin                                                             | CALB2    |
| Not defined | sp    | P22681  | CBL_HUMAN   | E3 ubiquitin-protein ligase CBL                                        | CBL      |
| Not defined | sp    | P22897  | MRC1_HUMAN  | Macrophage mannose receptor 1                                          | MRC1     |
| Not defined | sp    | P23025  | XPA_HUMAN   | DNA repair protein complementing XP-A cells                            | XPA      |
| Not defined | sp    | P23297  | S10A1_HUMAN | Protein S100-A1                                                        | S100A1   |
| Not defined | sp    | P23368  | MAOM_HUMAN  | NAD-dependent malic enzyme, mitochondrial                              | ME2      |
| Not defined | sp    | P23467  | PTPRB_HUMAN | Receptor-type tyrosine-protein phosphatase beta                        | PTPRB    |
| Not defined | sp    | P23468  | PTPRD_HUMAN | Receptor-type tyrosine-protein phosphatase delta                       | PTPRD    |
| Not defined | sp    | P23469  | PTPRE_HUMAN | Receptor-type tyrosine-protein phosphatase epsilon                     | PTPRE    |
| Not defined | sp    | P23470  | PTPRG_HUMAN | Receptor-type tyrosine-protein phosphatase gamma                       | PTPRG    |
| Not defined | sp    | P23497  | SP100_HUMAN | Nuclear autoantigen Sp-100                                             | SP100    |
| Not defined | sp    | P23508  | CRCM_HUMAN  | Colorectal mutant cancer protein                                       | MCC      |
| Not defined | sp    | P23511  | NFYA_HUMAN  | Nuclear transcription factor Y subunit alpha                           | NFYA     |
| Not defined | sp    | P23634  | AT2B4_HUMAN | Plasma membrane calcium-transporting ATPase 4                          | ATP2B4   |
| Not defined | sp    | P23743  | DGKA_HUMAN  | Diacylglycerol kinase alpha                                            | DGKA     |
| Not defined | sp    | P23763  | VAMP1_HUMAN | Vesicle-associated membrane protein 1                                  | VAMP1    |
| Not defined | sp    | P23919  | KTHY_HUMAN  | Thymidylate kinase                                                     | DTYMK    |
| Not defined | sp    | P23921  | RIR1_HUMAN  | Ribonucleoside-diphosphate reductase large subunit                     | RRM1     |
| Not defined | sp    | P24043  | LAMA2_HUMAN | Laminin subunit alpha-2                                                | LAMA2    |
| Not defined | sp    | P24046  | GBRR1_HUMAN | Gamma-aminobutyric acid receptor subunit rho-1                         | GABRR1   |
| Not defined | sp    | P24347  | MMP11_HUMAN | Stromelysin-3                                                          | MMP11    |
| Not defined | sp    | P24592  | IBP6_HUMAN  | Insulin-like growth factor-binding protein 6                           | IGFBP6   |
| Not defined | sp    | P24593  | IBP5_HUMAN  | Insulin-like growth factor-binding protein 5                           | IGFBP5   |
| Not defined | sp    | P24928  | RPB1_HUMAN  | DNA-directed RNA polymerase II subunit RPB1                            | POLR2A   |
| Not defined | sp    | P24941  | CDK2_HUMAN  | Cyclin-dependent kinase 2                                              | CDK2     |
| Not defined | sp    | P25054  | APC_HUMAN   | Adenomatous polyposis coli protein                                     | APC      |
| Not defined | sp    | P25205  | MCM3_HUMAN  | DNA replication licensing factor MCM3                                  | MCM3     |
| Not defined | sp    | P25208  | NFYB_HUMAN  | Nuclear transcription factor Y subunit beta                            | NFYB     |
| Not defined | sp    | P25311  | ZA2G_HUMAN  | Zinc-alpha-2-glycoprotein                                              | AZGP1    |
| Not defined | sp    | P25391  | LAMA1_HUMAN | Laminin subunit alpha-1                                                | LAMA1    |
| Not defined | sp    | P25440  | BRD2_HUMAN  | Bromodomain-containing protein 2                                       | BRD2     |
| Not defined | sp    | P25445  | TNR6_HUMAN  | Tumor necrosis factor receptor superfamily member 6                    | FAS      |
| Not defined | sp    | P25490  | YY1_HUMAN   | Transcriptional repressor protein YY1                                  | YY1      |
| Not defined | sp    | P25686  | DNJB2_HUMAN | DnaJ homolog subfamily B member 2                                      | DNJB2    |
| Not defined | sp    | P25815  | S100P_HUMAN | Protein S100-P                                                         | S100P    |
| Not defined | sp    | P26022  | PTX3_HUMAN  | Pentraxin-related protein PTX3                                         | PTX3     |
| Not defined | sp    | P26196  | DDX6_HUMAN  | Probable ATP-dependent RNA helicase DDX6                               | DDX6     |
| Not defined | sp    | P26232  | CTNA2_HUMAN | Catenin alpha-2                                                        | CTNNA2   |
| Not defined | sp    | P26358  | DNMT1_HUMAN | DNA (cytosine-5)-methyltransferase 1                                   | DNMT1    |
| Not defined | sp    | P26378  | ELAV4_HUMAN | ELAV-like protein 4                                                    | ELAVL4   |
| Not defined | sp    | P26447  | S10A4_HUMAN | Protein S100-A4                                                        | S100A4   |
| Not defined | sp    | P26572  | MGAT1_HUMAN | Alpha-1,3-mannosyl-glycoprotein 2-beta-N-acetylglucosaminyltransferase | MGAT1    |
| Not defined | sp    | P26640  | SYVC_HUMAN  | Valine-tRNA ligase                                                     | VARS1    |
| Not defined | sp    | P26927  | HGFL_HUMAN  | Hepatocyte growth factor-like protein                                  | MST1     |
| Not defined | sp    | P27105  | STOM_HUMAN  | Erythrocyte band 7 integral membrane protein                           | STOM     |
| Not defined | sp    | P27144  | KAD4_HUMAN  | Adenylate kinase 4, mitochondrial                                      | AK4      |
| Not defined | sp    | P27216  | ANX13_HUMAN | Annexin A13                                                            | ANXA13   |

Supplementary Table 2.xlsx

| Cluster     | class | UNIPROT | UNIPROT_ID   | Description                                                                            | GN       |
|-------------|-------|---------|--------------|----------------------------------------------------------------------------------------|----------|
| Not defined | sp    | P27361  | MK03_HUMAN   | Mitogen-activated protein kinase 3                                                     | MAPK3    |
| Not defined | sp    | P27448  | MARK3_HUMAN  | MAP/microtubule affinity-regulating kinase 3                                           | MARK3    |
| Not defined | sp    | P27449  | VATL_HUMAN   | V-type proton ATPase 16 kDa proteolipid subunit                                        | ATP6VOC  |
| Not defined | sp    | P27482  | CALL3_HUMAN  | Calmodulin-like protein 3                                                              | CALML3   |
| Not defined | sp    | P27635  | RL10_HUMAN   | 60S ribosomal protein L10                                                              | RPL10    |
| Not defined | sp    | P27701  | CD82_HUMAN   | CD82 antigen                                                                           | CD82     |
| Not defined | sp    | P27707  | DCK_HUMAN    | Deoxycytidine kinase                                                                   | DCK      |
| Not defined | sp    | P27708  | PYR1_HUMAN   | CAD protein                                                                            | CAD      |
| Not defined | sp    | P27815  | PDE4A_HUMAN  | cAMP-specific 3',5'-cyclic phosphodiesterase 4A                                        | PDE4A    |
| Not defined | sp    | P27930  | IL1R2_HUMAN  | Interleukin-1 receptor type 2                                                          | IL1R2    |
| Not defined | sp    | P28065  | PSB9_HUMAN   | Proteasome subunit beta type-9                                                         | PSMB9    |
| Not defined | sp    | P28067  | DMA_HUMAN    | HLA class II histocompatibility antigen, DM alpha chain                                | HLA-DMA  |
| Not defined | sp    | P28161  | GSTM2_HUMAN  | Glutathione S-transferase Mu 2                                                         | GSTM2    |
| Not defined | sp    | P28289  | TMOD1_HUMAN  | Tropomodulin-1                                                                         | TMOD1    |
| Not defined | sp    | P28324  | ELK4_HUMAN   | ETS domain-containing protein Elk-4                                                    | ELK4     |
| Not defined | sp    | P28370  | SMCA1_HUMAN  | Probable global transcription activator SNF2L1                                         | SMARCA1  |
| Not defined | sp    | P28676  | GRAN_HUMAN   | Grancalcin                                                                             | GCA      |
| Not defined | sp    | P28702  | RXRβ_HUMAN   | Retinoic acid receptor RXR-beta                                                        | RXRβ     |
| Not defined | sp    | P28799  | GRN_HUMAN    | Progranulin                                                                            | GRN      |
| Not defined | sp    | P29034  | S100A2_HUMAN | Protein S100-A2                                                                        | S100A2   |
| Not defined | sp    | P29083  | T2EA_HUMAN   | General transcription factor IIE subunit 1                                             | GTFE1    |
| Not defined | sp    | P29084  | T2EB_HUMAN   | Transcription initiation factor IIE subunit beta                                       | GTFE2    |
| Not defined | sp    | P29144  | TPP2_HUMAN   | Tripeptidyl-peptidase 2                                                                | TPP2     |
| Not defined | sp    | P29279  | CCN2_HUMAN   | CCN family member 2                                                                    | CCN2     |
| Not defined | sp    | P29320  | EPHA3_HUMAN  | Ephrin type-A receptor 3                                                               | EPHA3    |
| Not defined | sp    | P29322  | EPHA8_HUMAN  | Ephrin type-A receptor 8                                                               | EPHA8    |
| Not defined | sp    | P29323  | EPHB2_HUMAN  | Ephrin type-B receptor 2                                                               | EPHB2    |
| Not defined | sp    | P29353  | SHC1_HUMAN   | SHC-transforming protein 1                                                             | SHC1     |
| Not defined | sp    | P29372  | 3MG_HUMAN    | DNA-3-methyladenine glycosylase                                                        | MPG      |
| Not defined | sp    | P29373  | RABP2_HUMAN  | Cellular retinoic acid-binding protein 2                                               | CRABP2   |
| Not defined | sp    | P29466  | CASP1_HUMAN  | Caspase-1                                                                              | CASP1    |
| Not defined | sp    | P29508  | SPB3_HUMAN   | Serpin B3                                                                              | SERPINF3 |
| Not defined | sp    | P29536  | LMOD1_HUMAN  | Leiomodin-1                                                                            | LMOD1    |
| Not defined | sp    | P29558  | RBMS1_HUMAN  | RNA-binding motif, single-stranded-interacting protein 1                               | RBMS1    |
| Not defined | sp    | P29590  | PML_HUMAN    | Protein PML                                                                            | PML      |
| Not defined | sp    | P29762  | RABP1_HUMAN  | Cellular retinoic acid-binding protein 1                                               | CRABP1   |
| Not defined | sp    | P29803  | ODPAT_HUMAN  | Pyruvate dehydrogenase E1 component subunit alpha, testis-specific form, mitochondrial | PDHA2    |
| Not defined | sp    | P30038  | AL4A1_HUMAN  | Delta-1-pyrroline-5-carboxylate dehydrogenase, mitochondrial                           | ALDH4A1  |
| Not defined | sp    | P30047  | GFRP_HUMAN   | GTP cyclohydrolase 1 feedback regulatory protein                                       | GCHFR    |
| Not defined | sp    | P30153  | 2AAA_HUMAN   | Serine/threonine-protein phosphatase 2A 65 kDa regulatory subunit A alpha isoform      | PPP2R1A  |
| Not defined | sp    | P30154  | 2AAB_HUMAN   | Serine/threonine-protein phosphatase 2A 65 kDa regulatory subunit A beta isoform       | PPP2R1B  |
| Not defined | sp    | P30273  | FCERG_HUMAN  | High affinity immunoglobulin epsilon receptor subunit gamma                            | FCER1G   |
| Not defined | sp    | P30307  | MPIP3_HUMAN  | M-phase inducer phosphatase 3                                                          | CDC25C   |
| Not defined | sp    | P30408  | T4S1_HUMAN   | Transmembrane 4 L6 family member 1                                                     | TM4SF1   |
| Not defined | sp    | P30511  | HLA-F_HUMAN  | HLA class I histocompatibility antigen, alpha chain F                                  | HLA-F    |
| Not defined | sp    | P30519  | HMOX2_HUMAN  | Heme oxygenase 2                                                                       | HMOX2    |
| Not defined | sp    | P30520  | PURA2_HUMAN  | Adenylosuccinate synthetase isozyme 2                                                  | ADSS2    |
| Not defined | sp    | P30566  | PUR8_HUMAN   | Adenylosuccinate lyase                                                                 | ADSL     |
| Not defined | sp    | P30622  | CLIP1_HUMAN  | CAP-Gly domain-containing linker protein 1                                             | CLIP1    |
| Not defined | sp    | P30679  | GNA15_HUMAN  | Guanine nucleotide-binding protein subunit alpha-15                                    | GNA15    |
| Not defined | sp    | P30711  | GSTT1_HUMAN  | Glutathione S-transferase theta-1                                                      | GSTT1    |
| Not defined | sp    | P30838  | AL3A1_HUMAN  | Aldehyde dehydrogenase, dimeric NADP-preferring                                        | ALDH3A1  |
| Not defined | sp    | P31146  | COR1A_HUMAN  | Coronin-1A                                                                             | CORO1A   |
| Not defined | sp    | P31152  | MK04_HUMAN   | Mitogen-activated protein kinase 4                                                     | MAPK4    |
| Not defined | sp    | P31276  | HXC13_HUMAN  | Homeobox protein Hox-C13                                                               | HOXC13   |
| Not defined | sp    | P31321  | KAP1_HUMAN   | cAMP-dependent protein kinase type I-beta regulatory subunit                           | PRKAR1B  |
| Not defined | sp    | P31350  | RIR2_HUMAN   | Ribonucleoside-diphosphate reductase subunit M2                                        | RRM2     |
| Not defined | sp    | P31431  | SDC4_HUMAN   | Syndecan-4                                                                             | SDC4     |
| Not defined | sp    | P31629  | ZEP2_HUMAN   | Transcription factor HIVEP2                                                            | HIVEP2   |
| Not defined | sp    | P31751  | AKT2_HUMAN   | RAC-beta serine/threonine-protein kinase                                               | AKT2     |
| Not defined | sp    | P32004  | L1CAM_HUMAN  | Neural cell adhesion molecule L1                                                       | L1CAM    |
| Not defined | sp    | P32019  | I5P2_HUMAN   | Type II inositol 1,4,5-trisphosphate 5-phosphatase                                     | INPP5B   |
| Not defined | sp    | P32121  | ARRB2_HUMAN  | Beta-arrestin-2                                                                        | ARRB2    |
| Not defined | sp    | P32249  | GP183_HUMAN  | G-protein coupled receptor 183                                                         | GPR183   |
| Not defined | sp    | P32321  | DCTD_HUMAN   | Deoxycytidylate deaminase                                                              | DCTD     |
| Not defined | sp    | P32322  | P5CR1_HUMAN  | Pyroline-5-carboxylate reductase 1, mitochondrial                                      | PYCR1    |
| Not defined | sp    | P32780  | TF2H1_HUMAN  | General transcription factor IIF subunit 1                                             | GTFE2H1  |
| Not defined | sp    | P32929  | CGL_HUMAN    | Cystathionine gamma-lyase                                                              | CTH      |
| Not defined | sp    | P32969  | RL9_HUMAN    | 60S ribosomal protein L9                                                               | RPL9P8   |
| Not defined | sp    | P32970  | CD70_HUMAN   | CD70 antigen                                                                           | CD70     |
| Not defined | sp    | P33151  | CADH5_HUMAN  | Cadherin-5                                                                             | CDH5     |
| Not defined | sp    | P33176  | KINH_HUMAN   | Kinesin-1 heavy chain                                                                  | KIF5B    |
| Not defined | sp    | P33552  | CKS2_HUMAN   | Cyclin-dependent kinases regulatory subunit 2                                          | CKS2     |
| Not defined | sp    | P33908  | MA1A1_HUMAN  | Mannosyl-oligosaccharide 1,2-alpha-mannosidase IA                                      | MAN1A1   |
| Not defined | sp    | P33991  | MCM4_HUMAN   | DNA replication licensing factor MCM4                                                  | MCM4     |
| Not defined | sp    | P33992  | MCM5_HUMAN   | DNA replication licensing factor MCM5                                                  | MCM5     |
| Not defined | sp    | P33993  | MCM7_HUMAN   | DNA replication licensing factor MCM7                                                  | MCM7     |
| Not defined | sp    | P34059  | GALNS_HUMAN  | N-acetylgalactosamine-6-sulfatase                                                      | GALNS    |
| Not defined | sp    | P34896  | GLYC_HUMAN   | Serine hydroxymethyltransferase, cytosolic                                             | SHMT1    |
| Not defined | sp    | P34903  | GBRA3_HUMAN  | Gamma-aminobutyric acid receptor subunit alpha-3                                       | GABRA3   |
| Not defined | sp    | P34913  | HYES_HUMAN   | Bifunctional epoxide hydrolase 2                                                       | EPHX2    |
| Not defined | sp    | P34949  | MPI_HUMAN    | Mannose-6-phosphate isomerase                                                          | MPI      |
| Not defined | sp    | P35052  | GPC1_HUMAN   | Glypican-1                                                                             | GPC1     |
| Not defined | sp    | P35125  | UBP6_HUMAN   | Ubiquitin carboxyl-terminal hydrolase 6                                                | USP6     |
| Not defined | sp    | P35219  | CAH8_HUMAN   | Carbonic anhydrase-related protein                                                     | CA8      |
| Not defined | sp    | P35221  | CTNA1_HUMAN  | Catenin alpha-1                                                                        | CTNNA1   |
| Not defined | sp    | P35228  | NOS2_HUMAN   | Nitric oxide synthase, inducible                                                       | NOS2     |
| Not defined | sp    | P35240  | MERL_HUMAN   | Merlin                                                                                 | NF2      |
| Not defined | sp    | P35249  | RFC4_HUMAN   | Replication factor C subunit 4                                                         | RFC4     |
| Not defined | sp    | P35250  | RFC2_HUMAN   | Replication factor C subunit 2                                                         | RFC2     |

Supplementary Table 2.xlsx

| Cluster     | class | UNIPROT | UNIPROT_ID   | Description                                                            | GN       |
|-------------|-------|---------|--------------|------------------------------------------------------------------------|----------|
| Not defined | sp    | P35321  | SPR1A_HUMAN  | Cornifin-A                                                             | SPRR1A   |
| Not defined | sp    | P35354  | PGH2_HUMAN   | Prostaglandin G/H synthase 2                                           | PTGS2    |
| Not defined | sp    | P35475  | IDUA_HUMAN   | Alpha-L-iduronidase                                                    | IDUA     |
| Not defined | sp    | P35520  | CBS_HUMAN    | Cystathionine beta-synthase                                            | CBS      |
| Not defined | sp    | P35556  | FBN2_HUMAN   | Fibrillin-2                                                            | FBN2     |
| Not defined | sp    | P35558  | PCKGC_HUMAN  | Phosphoenolpyruvate carboxykinase, cytosolic [GTP]                     | PCK1     |
| Not defined | sp    | P35573  | GDE_HUMAN    | Glycogen debranching enzyme                                            | AGL      |
| Not defined | sp    | P35580  | MYH10_HUMAN  | Myosin-10                                                              | MYH10    |
| Not defined | sp    | P35611  | ADDA_HUMAN   | Alpha-adducin                                                          | ADD1     |
| Not defined | sp    | P35638  | DDIT3_HUMAN  | DNA damage-inducible transcript 3 protein                              | DDIT3    |
| Not defined | sp    | P35680  | HNF1B_HUMAN  | Hepatocyte nuclear factor 1-beta                                       | HNF1B    |
| Not defined | sp    | P35749  | MYH11_HUMAN  | Myosin-11                                                              | MYH11    |
| Not defined | sp    | P35754  | GLRX1_HUMAN  | Glutaredoxin-1                                                         | GLRX     |
| Not defined | sp    | P35813  | PPM1A_HUMAN  | Protein phosphatase 1A                                                 | PPM1A    |
| Not defined | sp    | P35858  | ALS_HUMAN    | Insulin-like growth factor-binding protein complex acid labile subunit | IGFALS   |
| Not defined | sp    | P35916  | VGFR3_HUMAN  | Vascular endothelial growth factor receptor 3                          | FLT4     |
| Not defined | sp    | P35968  | VGFR2_HUMAN  | Vascular endothelial growth factor receptor 2                          | KDR      |
| Not defined | sp    | P35998  | PRS7_HUMAN   | 26S proteasome regulatory subunit 7                                    | PSMC2    |
| Not defined | sp    | P36268  | GGT2_HUMAN   | Inactive glutathione hydrolase 2                                       | GGT2     |
| Not defined | sp    | P36404  | ARL2_HUMAN   | ADP-ribosylation factor-like protein 2                                 | ARL2     |
| Not defined | sp    | P36406  | TRIM23_HUMAN | E3 ubiquitin-protein ligase TRIM23                                     | TRIM23   |
| Not defined | sp    | P36507  | MP2K2_HUMAN  | Dual specificity mitogen-activated protein kinase kinase 2             | MAP2K2   |
| Not defined | sp    | P36542  | ATPG_HUMAN   | ATP synthase subunit gamma, mitochondrial                              | ATPSF1C  |
| Not defined | sp    | P36543  | VATE1_HUMAN  | V-type proton ATPase subunit E 1                                       | ATP6V1E1 |
| Not defined | sp    | P36551  | HEM6_HUMAN   | Oxygen-dependent coproporphyrinogen-III oxidase, mitochondrial         | CPOX     |
| Not defined | sp    | P36575  | ARRC_HUMAN   | Arrestin-C                                                             | ARR3     |
| Not defined | sp    | P36639  | 8ODP_HUMAN   | 7,8-dihydro-8-oxoguanine triphosphatase                                | NUDT1    |
| Not defined | sp    | P36776  | LONM_HUMAN   | Lon protease homolog, mitochondrial                                    | LONP1    |
| Not defined | sp    | P36871  | PGM1_HUMAN   | Phosphoglucomutase-1                                                   | PGM1     |
| Not defined | sp    | P36896  | ACVR1B_HUMAN | Activin receptor type-1B                                               | ACVR1B   |
| Not defined | sp    | P36952  | SPB5_HUMAN   | Serpin B5                                                              | SERPINB5 |
| Not defined | sp    | P36954  | RPB9_HUMAN   | DNA-directed RNA polymerase II subunit RPB9                            | POLR2I   |
| Not defined | sp    | P36959  | GMPR1_HUMAN  | GMP reductase 1                                                        | GMPR     |
| Not defined | sp    | P36969  | GPX4_HUMAN   | Phospholipid hydroperoxide glutathione peroxidase                      | GPX4     |
| Not defined | sp    | P37198  | NUP62_HUMAN  | Nuclear pore glycoprotein p62                                          | NUP62    |
| Not defined | sp    | P37235  | HPCL1_HUMAN  | Hippocalcin-like protein 1                                             | HPCAL1   |
| Not defined | sp    | P37840  | SYUA_HUMAN   | Alpha-synuclein                                                        | SNCA     |
| Not defined | sp    | P38567  | HYALP_HUMAN  | Hyaluronidase PH-20                                                    | SPAM1    |
| Not defined | sp    | P38571  | LIPA_HUMAN   | Lysosomal acid lipase/cholesteryl ester hydrolase                      | LIPA     |
| Not defined | sp    | P38606  | VATA_HUMAN   | V-type proton ATPase catalytic subunit A                               | ATP6V1A  |
| Not defined | sp    | P39059  | COFA1_HUMAN  | Collagen alpha-1(XV) chain                                             | COL15A1  |
| Not defined | sp    | P39060  | COIA1_HUMAN  | Collagen alpha-1(XVIII) chain                                          | COL18A1  |
| Not defined | sp    | P39748  | FEN1_HUMAN   | Flap endonuclease 1                                                    | FEN1     |
| Not defined | sp    | P39880  | CUX1_HUMAN   | Homeobox protein cut-like 1                                            | CUX1     |
| Not defined | sp    | P39900  | MMP12_HUMAN  | Macrophage metalloelastase                                             | MMP12    |
| Not defined | sp    | P40189  | IL6RB_HUMAN  | Interleukin-6 receptor subunit beta                                    | IL6ST    |
| Not defined | sp    | P40222  | TXLNA_HUMAN  | Alpha-taxilin                                                          | TXLNA    |
| Not defined | sp    | P40227  | TCPZ_HUMAN   | T-complex protein 1 subunit zeta                                       | CCT6A    |
| Not defined | sp    | P40259  | CD79B_HUMAN  | B-cell antigen receptor complex-associated protein beta chain          | CD79B    |
| Not defined | sp    | P40306  | PSB10_HUMAN  | Proteasome subunit beta type-10                                        | PSMB10   |
| Not defined | sp    | P40337  | VHL_HUMAN    | von Hippel-Lindau disease tumor suppressor                             | VHL      |
| Not defined | sp    | P40424  | PBX1_HUMAN   | Pre-B-cell leukemia transcription factor 1                             | PBX1     |
| Not defined | sp    | P40425  | PBX2_HUMAN   | Pre-B-cell leukemia transcription factor 2                             | PBX2     |
| Not defined | sp    | P40616  | ARL1_HUMAN   | ADP-ribosylation factor-like protein 1                                 | ARL1     |
| Not defined | sp    | P40692  | MLH1_HUMAN   | DNA mismatch repair protein Mlh1                                       | MLH1     |
| Not defined | sp    | P40763  | STAT3_HUMAN  | Signal transducer and activator of transcription 3                     | STAT3    |
| Not defined | sp    | P41091  | IF2G_HUMAN   | Eukaryotic translation initiation factor 2 subunit 3                   | EIF2S3   |
| Not defined | sp    | P41180  | CASR_HUMAN   | Extracellular calcium-sensing receptor                                 | CASR     |
| Not defined | sp    | P41208  | CETN2_HUMAN  | Centrin-2                                                              | CETN2    |
| Not defined | sp    | P41219  | PERI_HUMAN   | Peripherin                                                             | PRPH     |
| Not defined | sp    | P41221  | WNT5A_HUMAN  | Protein Wnt-5a                                                         | WNT5A    |
| Not defined | sp    | P41222  | PTGDS_HUMAN  | Prostaglandin-H2 D-isomerase                                           | PTGDS    |
| Not defined | sp    | P41227  | NAA10_HUMAN  | N-alpha-acetyltransferase 10                                           | NAA10    |
| Not defined | sp    | P41229  | KDM5C_HUMAN  | Lysine-specific demethylase 5C                                         | KDM5C    |
| Not defined | sp    | P41252  | SYIC_HUMAN   | Isoleucine-tRNA ligase, cytoplasmic                                    | IARS1    |
| Not defined | sp    | P41279  | M3K8_HUMAN   | Mitogen-activated protein kinase kinase 8                              | MAP3K8   |
| Not defined | sp    | P41743  | KPCI_HUMAN   | Protein kinase C iota type                                             | PRKCI    |
| Not defined | sp    | P42025  | ACTY_HUMAN   | Beta-actin                                                             | ACTR1B   |
| Not defined | sp    | P42224  | STAT1_HUMAN  | Signal transducer and activator of transcription 1-alpha/beta          | STAT1    |
| Not defined | sp    | P42263  | GRIA3_HUMAN  | Glutamate receptor 3                                                   | GRIA3    |
| Not defined | sp    | P42285  | MTREX_HUMAN  | Exosome RNA helicase MTR4                                              | MTREX    |
| Not defined | sp    | P42330  | AK1C3_HUMAN  | Aldo-keto reductase family 1 member C3                                 | AKR1C3   |
| Not defined | sp    | P42331  | RHG25_HUMAN  | Rho GTPase-activating protein 25                                       | ARHGAP25 |
| Not defined | sp    | P42357  | HUTH_HUMAN   | Histidine ammonia-lyase                                                | HAL      |
| Not defined | sp    | P42574  | CASP3_HUMAN  | Caspase-3                                                              | CASP3    |
| Not defined | sp    | P42677  | RS27_HUMAN   | 40S ribosomal protein S27                                              | RPS27    |
| Not defined | sp    | P42685  | FRK_HUMAN    | Tyrosine-protein kinase FRK                                            | FRK      |
| Not defined | sp    | P42696  | RBM34_HUMAN  | RNA-binding protein 34                                                 | RBM34    |
| Not defined | sp    | P42704  | LRPPRC_HUMAN | Leucine-rich PPR motif-containing protein, mitochondrial               | LRPPRC   |
| Not defined | sp    | P42765  | THIM_HUMAN   | 3-ketoacyl-CoA thiolase, mitochondrial                                 | ACA2     |
| Not defined | sp    | P42773  | CDKN2C_HUMAN | Cyclin-dependent kinase 4 inhibitor C                                  | CDKN2C   |
| Not defined | sp    | P42830  | CXCL5_HUMAN  | C-X-C motif chemokine 5                                                | CXCL5    |
| Not defined | sp    | P42858  | HD_HUMAN     | Huntingtin                                                             | HTT      |
| Not defined | sp    | P42898  | MTHFR_HUMAN  | Methylenetetrahydrofolate reductase                                    | MTHFR    |
| Not defined | sp    | P43007  | SATT_HUMAN   | Neutral amino acid transporter A                                       | SLC1A4   |
| Not defined | sp    | P43121  | MUC18_HUMAN  | Cell surface glycoprotein MUC18                                        | MUCAM    |
| Not defined | sp    | P43155  | CACP_HUMAN   | Carnitine O-acetyltransferase                                          | CRAT     |
| Not defined | sp    | P43235  | CATK_HUMAN   | Cathepsin K                                                            | CTSK     |
| Not defined | sp    | P43246  | MSH2_HUMAN   | DNA mismatch repair protein Msh2                                       | MSH2     |
| Not defined | sp    | P43251  | BTD_HUMAN    | Biotinidase                                                            | BTD      |

Supplementary Table 2.xlsx

| Cluster     | class | UNIPROT | UNIPROT_ID   | Description                                                                 | GN       |
|-------------|-------|---------|--------------|-----------------------------------------------------------------------------|----------|
| Not defined | sp    | P43304  | GPDM_HUMAN   | Glycerol-3-phosphate dehydrogenase, mitochondrial                           | GPD2     |
| Not defined | sp    | P43308  | SSRB_HUMAN   | Translocon-associated protein subunit beta                                  | SSR2     |
| Not defined | sp    | P43353  | AL3B1_HUMAN  | Aldehyde dehydrogenase family 3 member B1                                   | ALDH3B1  |
| Not defined | sp    | P43355  | MAGA1_HUMAN  | Melanoma-associated antigen 1                                               | MAGEA1   |
| Not defined | sp    | P43358  | MAGA4_HUMAN  | Melanoma-associated antigen 4                                               | MAGEA4   |
| Not defined | sp    | P43361  | MAGA8_HUMAN  | Melanoma-associated antigen 8                                               | MAGEA8   |
| Not defined | sp    | P43362  | MAGA9_HUMAN  | Melanoma-associated antigen 9                                               | MAGEA9B  |
| Not defined | sp    | P43363  | MAGAA_HUMAN  | Melanoma-associated antigen 10                                              | MAGEA10  |
| Not defined | sp    | P43366  | MAGB1_HUMAN  | Melanoma-associated antigen B1                                              | MAGEB1   |
| Not defined | sp    | P43490  | NAMPT_HUMAN  | Nicotinamide phosphoribosyltransferase                                      | NAMPT    |
| Not defined | sp    | P43629  | K13L1_HUMAN  | Killer cell immunoglobulin-like receptor 3DL1                               | KIR3DL1  |
| Not defined | sp    | P43652  | AFAM_HUMAN   | Afamin                                                                      | AFM      |
| Not defined | sp    | P43897  | EFTS_HUMAN   | Elongation factor Ts, mitochondrial                                         | TSFM     |
| Not defined | sp    | P45877  | PPIC_HUMAN   | Peptidyl-prolyl cis-trans isomerase C                                       | PPIC     |
| Not defined | sp    | P45880  | VDAC2_HUMAN  | Voltage-dependent anion-selective channel protein 2                         | VDAC2    |
| Not defined | sp    | P45954  | ACDSB_HUMAN  | Short/branched chain specific acyl-CoA dehydrogenase, mitochondrial         | ACADS8   |
| Not defined | sp    | P45983  | MK08_HUMAN   | Mitogen-activated protein kinase 8                                          | MAPK8    |
| Not defined | sp    | P45984  | MK09_HUMAN   | Mitogen-activated protein kinase 9                                          | MAPK9    |
| Not defined | sp    | P46013  | KI67_HUMAN   | Proliferation marker protein Ki-67                                          | MKI67    |
| Not defined | sp    | P46060  | RAGP1_HUMAN  | Ran GTPase-activating protein 1                                             | RANGAP1  |
| Not defined | sp    | P46199  | IF2M_HUMAN   | Translation initiation factor IF-2, mitochondrial                           | MTIF2    |
| Not defined | sp    | P46439  | GSTM5_HUMAN  | Glutathione S-transferase Mu 5                                              | GSTM5    |
| Not defined | sp    | P46459  | NSF_HUMAN    | Vesicle-fusing ATPase                                                       | NSF      |
| Not defined | sp    | P46597  | ASMT_HUMAN   | Acetylserotonin O-methyltransferase                                         | ASMT     |
| Not defined | sp    | P46736  | BRCC3_HUMAN  | Lys-63-specific deubiquitinase BRCC36                                       | BRCC3    |
| Not defined | sp    | P46776  | RL27A_HUMAN  | 60S ribosomal protein L27a                                                  | RPL27A   |
| Not defined | sp    | P46779  | RL28_HUMAN   | 60S ribosomal protein L28                                                   | RPL28    |
| Not defined | sp    | P46821  | MAP1B_HUMAN  | Microtubule-associated protein 1B                                           | MAP1B    |
| Not defined | sp    | P46934  | NEDD4_HUMAN  | E3 ubiquitin-protein ligase NEDD4                                           | NEDD4    |
| Not defined | sp    | P46939  | UTRO_HUMAN   | Utrophin                                                                    | UTRN     |
| Not defined | sp    | P46940  | IQGA1_HUMAN  | Ras GTPase-activating-like protein IQGAP1                                   | IQGAP1   |
| Not defined | sp    | P46977  | STT3A_HUMAN  | Dolichyl-diphosphooligosaccharide-protein glycosyltransferase subunit STT3A | STT3A    |
| Not defined | sp    | P47224  | MSS4_HUMAN   | Guanine nucleotide exchange factor MSS4                                     | RABIF    |
| Not defined | sp    | P47775  | GPR12_HUMAN  | G-protein coupled receptor 12                                               | GPR12    |
| Not defined | sp    | P47897  | SYQ_HUMAN    | Glutamine-tRNA ligase                                                       | QARS1    |
| Not defined | sp    | P48050  | KCNJ4_HUMAN  | Inward rectifier potassium channel 4                                        | KCNJ4    |
| Not defined | sp    | P48059  | LIMS1_HUMAN  | LIM and senescent cell antigen-like-containing domain protein 1             | LIMS1    |
| Not defined | sp    | P48163  | MAOX_HUMAN   | NADP-dependent malic enzyme                                                 | ME1      |
| Not defined | sp    | P48380  | RFX3_HUMAN   | Transcription factor RFX3                                                   | RFX3     |
| Not defined | sp    | P48426  | PI42A_HUMAN  | Phosphatidylinositol 5-phosphate 4-kinase type-2 alpha                      | PIP4K2A  |
| Not defined | sp    | P48431  | SOX2_HUMAN   | Transcription factor SOX-2                                                  | SOX2     |
| Not defined | sp    | P48436  | SOX9_HUMAN   | Transcription factor SOX-9                                                  | SOX9     |
| Not defined | sp    | P48443  | RXRG_HUMAN   | Retinoic acid receptor RXR-gamma                                            | RXRG     |
| Not defined | sp    | P48448  | AL3B2_HUMAN  | Aldehyde dehydrogenase family 3 member B2                                   | ALDH3B2  |
| Not defined | sp    | P48449  | ERG7_HUMAN   | Lanosterol synthase                                                         | LSS      |
| Not defined | sp    | P48454  | PP2B3_HUMAN  | Serine/threonine-protein phosphatase 2B catalytic subunit gamma isoform     | PPP3CC   |
| Not defined | sp    | P48506  | GSH1_HUMAN   | Glutamate-cysteine ligase catalytic subunit                                 | GCLC     |
| Not defined | sp    | P48507  | GSH0_HUMAN   | Glutamate-cysteine ligase regulatory subunit                                | GCLM     |
| Not defined | sp    | P48509  | CD151_HUMAN  | CD151 antigen                                                               | CD151    |
| Not defined | sp    | P48547  | KCNC1_HUMAN  | Potassium voltage-gated channel subfamily C member 1                        | KCNC1    |
| Not defined | sp    | P48549  | KCNJ3_HUMAN  | G protein-activated inward rectifier potassium channel 1                    | KCNJ3    |
| Not defined | sp    | P48552  | NRIP1_HUMAN  | Nuclear receptor-interacting protein 1                                      | NRIP1    |
| Not defined | sp    | P48594  | SPB4_HUMAN   | Serpin B4                                                                   | SERPINB4 |
| Not defined | sp    | P48634  | PRC2A_HUMAN  | Protein PRRC2A                                                              | PRRC2A   |
| Not defined | sp    | P48723  | HSP13_HUMAN  | Heat shock 70 kDa protein 13                                                | HSPA13   |
| Not defined | sp    | P48729  | KC1A_HUMAN   | Casein kinase I isoform alpha                                               | CSNK1A1  |
| Not defined | sp    | P48730  | KC1D_HUMAN   | Casein kinase I isoform delta                                               | CSNK1D   |
| Not defined | sp    | P48740  | MASP1_HUMAN  | Mannan-binding lectin serine protease 1                                     | MASP1    |
| Not defined | sp    | P48960  | AGRE5_HUMAN  | Adhesion G protein-coupled receptor E5                                      | ADGRE5   |
| Not defined | sp    | P49005  | DPOD2_HUMAN  | DNA polymerase delta subunit 2                                              | POLD2    |
| Not defined | sp    | P49019  | HCAR3_HUMAN  | Hydroxycarboxylic acid receptor 3                                           | HCAR3    |
| Not defined | sp    | P49184  | DNSL1_HUMAN  | Deoxyribonuclease-1-like 1                                                  | DNASE1L1 |
| Not defined | sp    | P49207  | RL34_HUMAN   | 60S ribosomal protein L34                                                   | RPL34    |
| Not defined | sp    | P49221  | TGM4_HUMAN   | Protein-glutamine gamma-glutamyltransferase 4                               | TGM4     |
| Not defined | sp    | P49247  | RPIA_HUMAN   | Ribose-5-phosphate isomerase                                                | RPIA     |
| Not defined | sp    | P49257  | LMAN1_HUMAN  | Protein ERGIC-53                                                            | LMAN1    |
| Not defined | sp    | P49354  | FNTA_HUMAN   | Protein farnesyltransferase/geranylgeranyltransferase type-1 subunit alpha  | FNTA     |
| Not defined | sp    | P49356  | FNTB_HUMAN   | Protein farnesyltransferase subunit beta                                    | FNTB     |
| Not defined | sp    | P49368  | TCPG_HUMAN   | T-complex protein 1 subunit gamma                                           | CCT3     |
| Not defined | sp    | P49407  | ARRB1_HUMAN  | Beta-arrestin-1                                                             | ARRB1    |
| Not defined | sp    | P49459  | UBE2A_HUMAN  | Ubiquitin-conjugating enzyme E2 A                                           | UBE2A    |
| Not defined | sp    | P49585  | PCYT1A_HUMAN | Choline-phosphate cytidylyltransferase A                                    | PCYT1A   |
| Not defined | sp    | P49590  | SYHM_HUMAN   | Histidine-tRNA ligase, mitochondrial                                        | HARS2    |
| Not defined | sp    | P49593  | PPM1F_HUMAN  | Protein phosphatase 1F                                                      | PPM1F    |
| Not defined | sp    | P49641  | MA2A2_HUMAN  | Alpha-mannosidase 2x                                                        | MAN2A2   |
| Not defined | sp    | P49662  | CASP4_HUMAN  | Caspase-4                                                                   | CASP4    |
| Not defined | sp    | P49703  | ARL4D_HUMAN  | ADP-ribosylation factor-like protein 4D                                     | ARL4D    |
| Not defined | sp    | P49711  | CTCF_HUMAN   | Transcriptional repressor CTCF                                              | CTCF     |
| Not defined | sp    | P49736  | MCM2_HUMAN   | DNA replication licensing factor MCM2                                       | MCM2     |
| Not defined | sp    | P49748  | ACADV_HUMAN  | Very long-chain specific acyl-CoA dehydrogenase, mitochondrial              | ACADVL   |
| Not defined | sp    | P49750  | YLPM1_HUMAN  | YLP motif-containing protein 1                                              | YLPM1    |
| Not defined | sp    | P49753  | ACOT2_HUMAN  | Acyl-coenzyme A thioesterase 2, mitochondrial                               | ACOT2    |
| Not defined | sp    | P49754  | VPS41_HUMAN  | Vacuolar protein sorting-associated protein 41 homolog                      | VPS41    |
| Not defined | sp    | P49756  | RBM25_HUMAN  | RNA-binding protein 25                                                      | RBM25    |
| Not defined | sp    | P49760  | CLK2_HUMAN   | Dual specificity protein kinase CLK2                                        | CLK2     |
| Not defined | sp    | P49768  | PSN1_HUMAN   | Presenilin-1                                                                | PSEN1    |
| Not defined | sp    | P49792  | RBP2_HUMAN   | E3 SUMO-protein ligase RanBP2                                               | RANBP2   |
| Not defined | sp    | P49840  | GSK3A_HUMAN  | Glycogen synthase kinase-3 alpha                                            | GSK3A    |
| Not defined | sp    | P49902  | SNTC_HUMAN   | Cytosolic purine 5'-nucleotidase                                            | NT5C2    |
| Not defined | sp    | P49915  | GUAA_HUMAN   | GMP synthase [glutamine-hydrolyzing]                                        | GMP5     |



Supplementary Table 2.xlsx

| Cluster     | class | UNIPROT | UNIPROT_ID   | Description                                                         | GN       |
|-------------|-------|---------|--------------|---------------------------------------------------------------------|----------|
| Not defined | sp    | P49917  | DNLI4_HUMAN  | DNA ligase 4                                                        | LIG4     |
| Not defined | sp    | P50053  | KHK_HUMAN    | Ketohexokinase                                                      | KHK      |
| Not defined | sp    | P50148  | GNAQ_HUMAN   | Guanine nucleotide-binding protein G(q) subunit alpha               | GNAQ     |
| Not defined | sp    | P50151  | GBG10_HUMAN  | Guanine nucleotide-binding protein G(lj)/G(s)/G(o) subunit gamma-10 | GNG10    |
| Not defined | sp    | P50238  | CRIP1_HUMAN  | Cysteine-rich protein 1                                             | CRIP1    |
| Not defined | sp    | P50281  | MMP14_HUMAN  | Matrix metalloproteinase-14                                         | MMP14    |
| Not defined | sp    | P50416  | CPT1A_HUMAN  | Carnitine O-palmitoyltransferase 1, liver isoform                   | CPT1A    |
| Not defined | sp    | P50453  | SPB9_HUMAN   | Serpin B9                                                           | SERPINB9 |
| Not defined | sp    | P50479  | PDLI4_HUMAN  | PDZ and LIM domain protein 4                                        | PDLIM4   |
| Not defined | sp    | P50542  | PEX5_HUMAN   | Peroxisomal targeting signal 1 receptor                             | PEX5     |
| Not defined | sp    | P50570  | DYN2_HUMAN   | Dynamin-2                                                           | DNM2     |
| Not defined | sp    | P50579  | MAP2_HUMAN   | Methionine aminopeptidase 2                                         | METAP2   |
| Not defined | sp    | P50607  | TUB_HUMAN    | Tubby protein homolog                                               | TUB      |
| Not defined | sp    | P50613  | CDK7_HUMAN   | Cyclin-dependent kinase 7                                           | CDK7     |
| Not defined | sp    | P50748  | KNTC1_HUMAN  | Kinetochore-associated protein 1                                    | KNTC1    |
| Not defined | sp    | P50750  | CDK9_HUMAN   | Cyclin-dependent kinase 9                                           | CDK9     |
| Not defined | sp    | P50991  | TCPD_HUMAN   | T-complex protein 1 subunit delta                                   | CCT4     |
| Not defined | sp    | P51003  | PAP0A_HUMAN  | Poly(A) polymerase alpha                                            | PAPOLA   |
| Not defined | sp    | P51114  | FXR1_HUMAN   | Fragile X mental retardation syndrome-related protein 1             | FXR1     |
| Not defined | sp    | P51116  | FXR2_HUMAN   | Fragile X mental retardation syndrome-related protein 2             | FXR2     |
| Not defined | sp    | P51151  | RAB9A_HUMAN  | Ras-related protein Rab-9A                                          | RAB9A    |
| Not defined | sp    | P51159  | RB27A_HUMAN  | Ras-related protein Rab-27A                                         | RAB27A   |
| Not defined | sp    | P51172  | SCNND_HUMAN  | Amiloride-sensitive sodium channel subunit delta                    | SCNN1D   |
| Not defined | sp    | P51178  | PLCD1_HUMAN  | 1-phosphatidylinositol 4,5-bisphosphate phosphodiesterase delta-1   | PLCD1    |
| Not defined | sp    | P51451  | BLK_HUMAN    | Tyrosine-protein kinase Blk                                         | BLK      |
| Not defined | sp    | P51452  | DUS3_HUMAN   | Dual specificity protein phosphatase 3                              | DUSP3    |
| Not defined | sp    | P51512  | MMP16_HUMAN  | Matrix metalloproteinase-16                                         | MMP16    |
| Not defined | sp    | P51530  | DNA2_HUMAN   | DNA replication ATP-dependent helicase/nuclease DNA2                | DNA2     |
| Not defined | sp    | P51531  | SMCA2_HUMAN  | Probable global transcription activator SNF2L2                      | SMARCA2  |
| Not defined | sp    | P51532  | SMCA4_HUMAN  | Transcription activator BRG1                                        | SMARCA4  |
| Not defined | sp    | P51553  | IDH3G_HUMAN  | Isocitrate dehydrogenase [NAD] subunit gamma, mitochondrial         | IDH3G    |
| Not defined | sp    | P51580  | TPMT_HUMAN   | Thiopurine S-methyltransferase                                      | TPMT     |
| Not defined | sp    | P51587  | BRCA2_HUMAN  | Breast cancer type 2 susceptibility protein                         | BRCA2    |
| Not defined | sp    | P51608  | MECP2_HUMAN  | Methyl-CpG-binding protein 2                                        | MECP2    |
| Not defined | sp    | P51610  | HCFC1_HUMAN  | Host cell factor 1                                                  | HCFC1    |
| Not defined | sp    | P51617  | IRAK1_HUMAN  | Interleukin-1 receptor-associated kinase 1                          | IRAK1    |
| Not defined | sp    | P51649  | SSDH_HUMAN   | Succinate-semialdehyde dehydrogenase, mitochondrial                 | ALDH5A1  |
| Not defined | sp    | P51687  | SUOX_HUMAN   | Sulfite oxidase, mitochondrial                                      | SUOX     |
| Not defined | sp    | P51688  | SPHM_HUMAN   | N-sulphoglucosamine sulphohydrolase                                 | SGSH     |
| Not defined | sp    | P51689  | ARSD_HUMAN   | Arylsulfatase D                                                     | ARSD     |
| Not defined | sp    | P51784  | UBP11_HUMAN  | Ubiquitin carboxyl-terminal hydrolase 11                            | USP11    |
| Not defined | sp    | P51814  | ZNF41_HUMAN  | Zinc finger protein 41                                              | ZNF41    |
| Not defined | sp    | P51843  | NROB1_HUMAN  | Nuclear receptor subfamily 0 group B member 1                       | NROB1    |
| Not defined | sp    | P51854  | TKTL1_HUMAN  | Transketolase-like protein 1                                        | TKTL1    |
| Not defined | sp    | P51857  | AKR1D1_HUMAN | Aldo-keto reductase family 1 member D1                              | AKR1D1   |
| Not defined | sp    | P51948  | MAT1_HUMAN   | CDK-activating kinase assembly factor MAT1                          | MNAT1    |
| Not defined | sp    | P51965  | UBE2E1_HUMAN | Ubiquitin-conjugating enzyme E2 E1                                  | UBE2E1   |
| Not defined | sp    | P51993  | FUT6_HUMAN   | Alpha-(1,3)-fucosyltransferase 6                                    | FUT6     |
| Not defined | sp    | P52209  | 6PGD_HUMAN   | 6-phosphogluconate dehydrogenase, decarboxylating                   | PGD      |
| Not defined | sp    | P52292  | IMA1_HUMAN   | Importin subunit alpha-1                                            | KPNA2    |
| Not defined | sp    | P52294  | IMA5_HUMAN   | Importin subunit alpha-5                                            | KPNA1    |
| Not defined | sp    | P52298  | NCBP2_HUMAN  | Nuclear cap-binding protein subunit 2                               | NCBP2    |
| Not defined | sp    | P52429  | DGKE_HUMAN   | Diacylglycerol kinase epsilon                                       | DGKE     |
| Not defined | sp    | P52566  | GDIR2_HUMAN  | Rho GDP-dissociation inhibitor 2                                    | ARHGDI2  |
| Not defined | sp    | P52569  | CTR2_HUMAN   | Cationic amino acid transporter 2                                   | SLC7A2   |
| Not defined | sp    | P52594  | AGFG1_HUMAN  | Arf-GAP domain and FG repeat-containing protein 1                   | AGFG1    |
| Not defined | sp    | P52655  | TF2AA_HUMAN  | Transcription initiation factor IIA subunit 1                       | TF2A1    |
| Not defined | sp    | P52657  | TF2AG_HUMAN  | Transcription initiation factor IIA subunit 2                       | TF2A2    |
| Not defined | sp    | P52732  | KIF11_HUMAN  | Kinesin-like protein KIF11                                          | KIF11    |
| Not defined | sp    | P52747  | ZNF143_HUMAN | Zinc finger protein 143                                             | ZNF143   |
| Not defined | sp    | P52823  | STC1_HUMAN   | Stanniocalcin-1                                                     | STC1     |
| Not defined | sp    | P52888  | THOP1_HUMAN  | Thimet oligopeptidase                                               | THOP1    |
| Not defined | sp    | P52895  | AK1C2_HUMAN  | Aldo-keto reductase family 1 member C2                              | AKR1C2   |
| Not defined | sp    | P52943  | CRIP2_HUMAN  | Cysteine-rich protein 2                                             | CRIP2    |
| Not defined | sp    | P52948  | NUP98_HUMAN  | Nuclear pore complex protein Nup98-Nup96                            | NUP98    |
| Not defined | sp    | P53004  | BIEA_HUMAN   | Biliverdin reductase A                                              | BLVRA    |
| Not defined | sp    | P53007  | TXTP_HUMAN   | Tricarboxylate transport protein, mitochondrial                     | SLC25A1  |
| Not defined | sp    | P53041  | PPP5_HUMAN   | Serine/threonine-protein phosphatase 5                              | PPP5C    |
| Not defined | sp    | P53365  | ARFP2_HUMAN  | Arfaptin-2                                                          | ARFP2    |
| Not defined | sp    | P53396  | ACLY_HUMAN   | ATP-citrate synthase                                                | ACLY     |
| Not defined | sp    | P53597  | SUCA_HUMAN   | Succinate-CoA ligase [ADP/GDP-forming] subunit alpha, mitochondrial | SUCLG1   |
| Not defined | sp    | P53602  | MVD1_HUMAN   | Diphosphomevalonate decarboxylase                                   | MVD      |
| Not defined | sp    | P53611  | PGBT2_HUMAN  | Geranylgeranyl transferase type-2 subunit beta                      | RABGGTB  |
| Not defined | sp    | P53618  | COPB_HUMAN   | Coatamer subunit beta                                               | COPB1    |
| Not defined | sp    | P53621  | COPA_HUMAN   | Coatamer subunit alpha                                              | COPA     |
| Not defined | sp    | P53667  | LIMK1_HUMAN  | LIM domain kinase 1                                                 | LIMK1    |
| Not defined | sp    | P53675  | CLH2_HUMAN   | Clathrin heavy chain 2                                              | CLTC1    |
| Not defined | sp    | P53701  | CCHL_HUMAN   | Cytochrome c-type heme lyase                                        | HCCS     |
| Not defined | sp    | P53778  | MK12_HUMAN   | Mitogen-activated protein kinase 12                                 | MAPK12   |
| Not defined | sp    | P53779  | MK10_HUMAN   | Mitogen-activated protein kinase 10                                 | MAPK10   |
| Not defined | sp    | P53801  | PTTG_HUMAN   | Pituitary tumor-transforming gene 1 protein-interacting protein     | PTTG1P   |
| Not defined | sp    | P53803  | RPAB4_HUMAN  | DNA-directed RNA polymerases I, II, and III subunit RPABC4          | POLR2K   |
| Not defined | sp    | P53985  | MOT1_HUMAN   | Monocarboxylate transporter 1                                       | SLC16A1  |
| Not defined | sp    | P53990  | IST1_HUMAN   | IST1 homolog                                                        | IST1     |
| Not defined | sp    | P53992  | SC24C_HUMAN  | Protein transport protein Sec24C                                    | SEC24C   |
| Not defined | sp    | P54132  | BLM_HUMAN    | Bloom syndrome protein                                              | BLM      |
| Not defined | sp    | P54136  | SYRC_HUMAN   | Arginine-tRNA ligase, cytoplasmic                                   | RARS1    |
| Not defined | sp    | P54253  | ATX1_HUMAN   | Ataxin-1                                                            | ATXN1    |
| Not defined | sp    | P54257  | HAP1_HUMAN   | Huntingtin-associated protein 1                                     | HAP1     |
| Not defined | sp    | P54259  | ATN1_HUMAN   | Atrophin-1                                                          | ATN1     |

Supplementary Table 2.xlsx

| Cluster     | class | UNIPROT | UNIPROT_ID   | Description                                                           | GN        |
|-------------|-------|---------|--------------|-----------------------------------------------------------------------|-----------|
| Not defined | sp    | P54277  | PMS1_HUMAN   | PMS1 protein homolog 1                                                | PMS1      |
| Not defined | sp    | P54289  | CA2D1_HUMAN  | Voltage-dependent calcium channel subunit alpha-2/delta-1             | CACNA2D1  |
| Not defined | sp    | P54687  | BCAT1_HUMAN  | Branched-chain-amino-acid aminotransferase, cytosolic                 | BCAT1     |
| Not defined | sp    | P54707  | AT12A_HUMAN  | Potassium-transporting ATPase alpha chain 2                           | ATP12A    |
| Not defined | sp    | P54753  | EPHB3_HUMAN  | Ephrin type-B receptor 3                                              | EPHB3     |
| Not defined | sp    | P54756  | EPHA5_HUMAN  | Ephrin type-A receptor 5                                              | EPHA5     |
| Not defined | sp    | P54760  | EPHB4_HUMAN  | Ephrin type-B receptor 4                                              | EPHB4     |
| Not defined | sp    | P54762  | EPHB1_HUMAN  | Ephrin type-B receptor 1                                              | EPHB1     |
| Not defined | sp    | P54764  | EPHA4_HUMAN  | Ephrin type-A receptor 4                                              | EPHA4     |
| Not defined | sp    | P54802  | ANAG_HUMAN   | Alpha-N-acetylglucosaminidase                                         | NAGLU     |
| Not defined | sp    | P54803  | GALC_HUMAN   | Galactocerebrosidase                                                  | GALC      |
| Not defined | sp    | P54840  | GYS2_HUMAN   | Glycogen [starch] synthase, liver                                     | GYS2      |
| Not defined | sp    | P54851  | EMP2_HUMAN   | Epithelial membrane protein 2                                         | EMP2      |
| Not defined | sp    | P54868  | HMGCS2_HUMAN | Hydroxymethylglutaryl-CoA synthase, mitochondrial                     | HMGCS2    |
| Not defined | sp    | P54886  | P5CS_HUMAN   | Delta-1-pyrroline-5-carboxylate synthase                              | ALDH18A1  |
| Not defined | sp    | P54920  | SNAA_HUMAN   | Alpha-soluble NSF attachment protein                                  | NAPA      |
| Not defined | sp    | P55011  | S12A2_HUMAN  | Solute carrier family 12 member 2                                     | SLC12A2   |
| Not defined | sp    | P55039  | DRG2_HUMAN   | Developmentally-regulated GTP-binding protein 2                       | DRG2      |
| Not defined | sp    | P55060  | XPO2_HUMAN   | Exportin-2                                                            | CSE1L     |
| Not defined | sp    | P55061  | BI1_HUMAN    | Bax inhibitor 1                                                       | TMBIM6    |
| Not defined | sp    | P55081  | MFAP1_HUMAN  | Microfibrillar-associated protein 1                                   | MFAP1     |
| Not defined | sp    | P55160  | NCKPL_HUMAN  | Nck-associated protein 1-like                                         | NCKAP1L   |
| Not defined | sp    | P55196  | AFAD_HUMAN   | Afadin                                                                | AFDN      |
| Not defined | sp    | P55201  | BRPF1_HUMAN  | Peregrin                                                              | BRPF1     |
| Not defined | sp    | P55265  | DSRAD_HUMAN  | Double-stranded RNA-specific adenosine deaminase                      | ADAR      |
| Not defined | sp    | P55268  | LAMB2_HUMAN  | Laminin subunit beta-2                                                | LAMB2     |
| Not defined | sp    | P55283  | CADH4_HUMAN  | Cadherin-4                                                            | CDH4      |
| Not defined | sp    | P55285  | CADH6_HUMAN  | Cadherin-6                                                            | CDH6      |
| Not defined | sp    | P55287  | CAD11_HUMAN  | Cadherin-11                                                           | CDH11     |
| Not defined | sp    | P55289  | CAD12_HUMAN  | Cadherin-12                                                           | CDH12     |
| Not defined | sp    | P55318  | FOXA3_HUMAN  | Hepatocyte nuclear factor 3-gamma                                     | FOXA3     |
| Not defined | sp    | P55735  | SEC13_HUMAN  | Protein SEC13 homolog                                                 | SEC13     |
| Not defined | sp    | P55786  | PSA_HUMAN    | Puromycin-sensitive aminopeptidase                                    | NPPEPS    |
| Not defined | sp    | P55884  | EIF3B_HUMAN  | Eukaryotic translation initiation factor 3 subunit B                  | EIF3B     |
| Not defined | sp    | P55899  | FCGRN_HUMAN  | IgG receptor FcRn large subunit p51                                   | FCGR1     |
| Not defined | sp    | P55957  | BID_HUMAN    | BH3-interacting domain death agonist                                  | BID       |
| Not defined | sp    | P56181  | NDUV3_HUMAN  | NADH dehydrogenase [ubiquinone] flavoprotein 3, mitochondrial         | NDUVF3    |
| Not defined | sp    | P56182  | RRP1_HUMAN   | Ribosomal RNA processing protein 1 homolog A                          | RRP1      |
| Not defined | sp    | P56192  | SYMC_HUMAN   | Methionine-tRNA ligase, cytoplasmic                                   | MARS1     |
| Not defined | sp    | P56199  | ITGA1_HUMAN  | Integrin alpha-1                                                      | ITGA1     |
| Not defined | sp    | P56378  | ATP6B_HUMAN  | ATP synthase subunit ATP5MPL, mitochondrial                           | ATP5MPL   |
| Not defined | sp    | P56539  | CAV3_HUMAN   | Caveolin-3                                                            | CAV3      |
| Not defined | sp    | P56556  | NDUA6_HUMAN  | NADH dehydrogenase [ubiquinone] 1 alpha subcomplex subunit 6          | NDUFA6    |
| Not defined | sp    | P56557  | TM50B_HUMAN  | Transmembrane protein 50B                                             | TMEM50B   |
| Not defined | sp    | P56693  | SOX10_HUMAN  | Transcription factor SOX-10                                           | SOX10     |
| Not defined | sp    | P56747  | CLDN6_HUMAN  | Claudin-6                                                             | CLDN6     |
| Not defined | sp    | P56749  | CLDN12_HUMAN | Claudin-12                                                            | CLDN12    |
| Not defined | sp    | P56945  | BCAR1_HUMAN  | Breast cancer anti-estrogen resistance protein 1                      | BCAR1     |
| Not defined | sp    | P56962  | STX17_HUMAN  | Syntaxin-17                                                           | STX17     |
| Not defined | sp    | P57073  | SOX8_HUMAN   | Transcription factor SOX-8                                            | SOX8      |
| Not defined | sp    | P57076  | CF298_HUMAN  | Cilia- and flagella-associated protein 298                            | CFAP298   |
| Not defined | sp    | P57081  | WDR4_HUMAN   | tRNA (guanine-N(7))-methyltransferase non-catalytic subunit WDR4      | WDR4      |
| Not defined | sp    | P57088  | TMM33_HUMAN  | Transmembrane protein 33                                              | TMEM33    |
| Not defined | sp    | P57105  | SYJ2B_HUMAN  | Synaptojanin-2-binding protein                                        | SYNJ2BP   |
| Not defined | sp    | P57723  | PCBP4_HUMAN  | Poly(rC)-binding protein 4                                            | PCBP4     |
| Not defined | sp    | P57735  | RAB25_HUMAN  | Ras-related protein Rab-25                                            | RAB25     |
| Not defined | sp    | P57737  | CORO7_HUMAN  | Coronin-7                                                             | CORO7     |
| Not defined | sp    | P57740  | NU107_HUMAN  | Nuclear pore complex protein Nup107                                   | NUP107    |
| Not defined | sp    | P58004  | SESN2_HUMAN  | Sestrin-2                                                             | SESN2     |
| Not defined | sp    | P58005  | SESN3_HUMAN  | Sestrin-3                                                             | SESN3     |
| Not defined | sp    | P58107  | EPIPL_HUMAN  | Epiplakin                                                             | EPPK1     |
| Not defined | sp    | P58335  | ANTR2_HUMAN  | Anthrax toxin receptor 2                                              | ANTR2     |
| Not defined | sp    | P58397  | ATS12_HUMAN  | A disintegrin and metalloproteinase with thrombospondin motifs 12     | ADAMTS12  |
| Not defined | sp    | P59047  | NALP5_HUMAN  | NACHT, LRR and PYD domains-containing protein 5                       | NLRP5     |
| Not defined | sp    | P59074  | CHMP4B_HUMAN | Putative charged multivesicular body protein 4B-like protein CHMP4BP1 | CHMP4BP1  |
| Not defined | sp    | P59510  | ATS20_HUMAN  | A disintegrin and metalloproteinase with thrombospondin motifs 20     | ADAMTS20  |
| Not defined | sp    | P59826  | BPIB3_HUMAN  | BPI fold-containing family B member 3                                 | BPIFB3    |
| Not defined | sp    | P60033  | CD81_HUMAN   | CD81 antigen                                                          | CD81      |
| Not defined | sp    | P60153  | RNAS9_HUMAN  | Inactive ribonuclease-like protein 9                                  | RNASE9    |
| Not defined | sp    | P60228  | EIF3E_HUMAN  | Eukaryotic translation initiation factor 3 subunit E                  | EIF3E     |
| Not defined | sp    | P60468  | SC61B_HUMAN  | Protein transport protein Sec61 subunit beta                          | SEC61B    |
| Not defined | sp    | P60508  | SYCY2_HUMAN  | Syncytin-2                                                            | ERVFRD-1  |
| Not defined | sp    | P60510  | PP4C_HUMAN   | Serine/threonine-protein phosphatase 4 catalytic subunit              | PPP4C     |
| Not defined | sp    | P60520  | GBRL2_HUMAN  | Gamma-aminobutyric acid receptor-associated protein-like 2            | GABARAPL2 |
| Not defined | sp    | P60602  | ROMO1_HUMAN  | Reactive oxygen species modulator 1                                   | ROMO1     |
| Not defined | sp    | P60604  | UB2G2_HUMAN  | Ubiquitin-conjugating enzyme E2 G2                                    | UBE2G2    |
| Not defined | sp    | P60880  | SNP25_HUMAN  | Synaptosomal-associated protein 25                                    | SNAP25    |
| Not defined | sp    | P60981  | DEST_HUMAN   | Destrin                                                               | DSTN      |
| Not defined | sp    | P60983  | GMFB_HUMAN   | Glia maturation factor beta                                           | GMFB      |
| Not defined | sp    | P61009  | SPCS3_HUMAN  | Signal peptidase complex subunit 3                                    | SPCS3     |
| Not defined | sp    | P61024  | CKS1_HUMAN   | Cyclin-dependent kinases regulatory subunit 1                         | CKS1B     |
| Not defined | sp    | P61077  | UB2D3_HUMAN  | Ubiquitin-conjugating enzyme E2 D3                                    | UBE2D3    |
| Not defined | sp    | P61081  | UBC12_HUMAN  | NEDD8-conjugating enzyme Ubc12                                        | UBE2M     |
| Not defined | sp    | P61129  | ZC3H6_HUMAN  | Zinc finger CCH domain-containing protein 6                           | ZC3H6     |
| Not defined | sp    | P61201  | CSN2_HUMAN   | COP9 signalosome complex subunit 2                                    | COPS2     |
| Not defined | sp    | P61218  | RPAB2_HUMAN  | DNA-directed RNA polymerases I, II, and III subunit RPABC2            | POLR2F    |
| Not defined | sp    | P61221  | ABCE1_HUMAN  | ATP-binding cassette sub-family E member 1                            | ABCE1     |
| Not defined | sp    | P61244  | MAX_HUMAN    | Protein max                                                           | MAX       |
| Not defined | sp    | P61457  | PHS_HUMAN    | Pterin-4-alpha-carbinolamine dehydratase                              | PCBD1     |
| Not defined | sp    | P61513  | RL37A_HUMAN  | 60S ribosomal protein L37a                                            | RPL37A    |

Supplementary Table 2.xlsx

| Cluster     | class | UNIPROT | UNIPROT_ID   | Description                                                                      | GN      |
|-------------|-------|---------|--------------|----------------------------------------------------------------------------------|---------|
| Not defined | sp    | P61599  | NAA20_HUMAN  | N-alpha-acetyltransferase 20                                                     | NAA20   |
| Not defined | sp    | P61601  | NCALD_HUMAN  | Neurocalcin-delta                                                                | NCALD   |
| Not defined | sp    | P61769  | B2MG_HUMAN   | Beta-2-microglobulin                                                             | B2M     |
| Not defined | sp    | P61916  | NPC2_HUMAN   | NPC intracellular cholesterol transporter 2                                      | NPC2    |
| Not defined | sp    | P61962  | DCAF7_HUMAN  | DDB1- and CUL4-associated factor 7                                               | DCAF7   |
| Not defined | sp    | P62070  | RRAS2_HUMAN  | Ras-related protein R-Ras2                                                       | RRAS2   |
| Not defined | sp    | P62072  | TIM10_HUMAN  | Mitochondrial import inner membrane translocase subunit Tim10                    | TIMM10  |
| Not defined | sp    | P62195  | PR58_HUMAN   | 26S proteasome regulatory subunit 8                                              | PSMC5   |
| Not defined | sp    | P62241  | RS8_HUMAN    | 40S ribosomal protein S8                                                         | RPS8    |
| Not defined | sp    | P62244  | RS15A_HUMAN  | 40S ribosomal protein S15a                                                       | RPS15A  |
| Not defined | sp    | P62253  | UB2G1_HUMAN  | Ubiquitin-conjugating enzyme E2 G1                                               | UBE2G1  |
| Not defined | sp    | P62256  | UBE2H_HUMAN  | Ubiquitin-conjugating enzyme E2 H                                                | UBE2H   |
| Not defined | sp    | P62266  | RS23_HUMAN   | 40S ribosomal protein S23                                                        | RPS23   |
| Not defined | sp    | P62280  | RS11_HUMAN   | 40S ribosomal protein S11                                                        | RPS11   |
| Not defined | sp    | P62330  | ARF6_HUMAN   | ADP-ribosylation factor 6                                                        | ARF6    |
| Not defined | sp    | P62333  | PRS10_HUMAN  | 26S proteasome regulatory subunit 10B                                            | PSMC6   |
| Not defined | sp    | P62341  | SELT_HUMAN   | Thioredoxin reductase-like selenoprotein T                                       | SELENOT |
| Not defined | sp    | P62495  | ERF1_HUMAN   | Eukaryotic peptide chain release factor subunit 1                                | ETF1    |
| Not defined | sp    | P62701  | RS4X_HUMAN   | 40S ribosomal protein S4, X isoform                                              | RPS4X   |
| Not defined | sp    | P62745  | RHOB_HUMAN   | Rho-related GTP-binding protein RhoB                                             | RHOB    |
| Not defined | sp    | P62753  | RS6_HUMAN    | 40S ribosomal protein S6                                                         | RPS6    |
| Not defined | sp    | P62837  | UB2D2_HUMAN  | Ubiquitin-conjugating enzyme E2 D2                                               | UBE2D2  |
| Not defined | sp    | P62854  | RS26_HUMAN   | 40S ribosomal protein S26                                                        | RPS26   |
| Not defined | sp    | P62877  | RBX1_HUMAN   | E3 ubiquitin-protein ligase RBX1                                                 | RBX1    |
| Not defined | sp    | P62891  | RL39_HUMAN   | 60S ribosomal protein L39                                                        | RPL39   |
| Not defined | sp    | P62899  | RL31_HUMAN   | 60S ribosomal protein L31                                                        | RPL31   |
| Not defined | sp    | P63010  | AP2B1_HUMAN  | AP-2 complex subunit beta                                                        | AP2B1   |
| Not defined | sp    | P63098  | CANB1_HUMAN  | Calcineurin subunit B type 1                                                     | PPP3R1  |
| Not defined | sp    | P63146  | UBE2B_HUMAN  | Ubiquitin-conjugating enzyme E2 B                                                | UBE2B   |
| Not defined | sp    | P63151  | 2ABA_HUMAN   | Serine/threonine-protein phosphatase 2A55 kDa regulatory subunit B alpha isoform | PPP2R2A |
| Not defined | sp    | P63167  | DYL1_HUMAN   | Dynein light chain 1, cytoplasmic                                                | DYNLL1  |
| Not defined | sp    | P63218  | GBG5_HUMAN   | Guanine nucleotide-binding protein G(I)/G(S)/G(O) subunit gamma-5                | GN5     |
| Not defined | sp    | P63252  | KCNJ2_HUMAN  | Inward rectifier potassium channel 2                                             | KCNJ2   |
| Not defined | sp    | P63272  | SPT4H_HUMAN  | Transcription elongation factor SPT4                                             | SUPT4H1 |
| Not defined | sp    | P63313  | TYB10_HUMAN  | Thymosin beta-10                                                                 | TMSB10  |
| Not defined | sp    | P67812  | SC11A_HUMAN  | Signal peptidase complex catalytic subunit SEC11A                                | SEC11A  |
| Not defined | sp    | P68106  | FKBP1B_HUMAN | Peptidyl-prolyl cis-trans isomerase FKBP1B                                       | FKBP1B  |
| Not defined | sp    | P78310  | CXAR_HUMAN   | Coxsackievirus and adenovirus receptor                                           | CXADR   |
| Not defined | sp    | P78329  | CP4F2_HUMAN  | Cytochrome P450 4F2                                                              | CYP4F2  |
| Not defined | sp    | P78344  | IF4G2_HUMAN  | Eukaryotic translation initiation factor 4 gamma 2                               | EIF4G2  |
| Not defined | sp    | P78346  | RPP30_HUMAN  | Ribonuclease P protein subunit p30                                               | RPP30   |
| Not defined | sp    | P78347  | GTF2I_HUMAN  | General transcription factor II-I                                                | GTF2I   |
| Not defined | sp    | P78352  | DLG4_HUMAN   | Disks large homolog 4                                                            | DLG4    |
| Not defined | sp    | P78357  | CNTP1_HUMAN  | Contactin-associated protein 1                                                   | CNTNAP1 |
| Not defined | sp    | P78362  | SRPK2_HUMAN  | SRSF protein kinase 2                                                            | SRPK2   |
| Not defined | sp    | P78368  | KC1G2_HUMAN  | Casein kinase I isoform gamma-2                                                  | CSNK1G2 |
| Not defined | sp    | P78369  | CLD10_HUMAN  | Claudin-10                                                                       | CLDN10  |
| Not defined | sp    | P78504  | JAG1_HUMAN   | Protein jagged-1                                                                 | JAG1    |
| Not defined | sp    | P78509  | RELN_HUMAN   | Reelin                                                                           | RELN    |
| Not defined | sp    | P78524  | DEN2B_HUMAN  | DENN domain-containing protein 2B                                                | DENND2B |
| Not defined | sp    | P78527  | PRKDC_HUMAN  | DNA-dependent protein kinase catalytic subunit                                   | PRKDC   |
| Not defined | sp    | P78536  | ADA17_HUMAN  | Disintegrin and metalloproteinase domain-containing protein 17                   | ADAM17  |
| Not defined | sp    | P78537  | BL1S1_HUMAN  | Biogenesis of lysosome-related organelles complex 1 subunit 1                    | BLOC1S1 |
| Not defined | sp    | P78540  | ARGI2_HUMAN  | Arginase-2, mitochondrial                                                        | ARG2    |
| Not defined | sp    | P78552  | IL13R1_HUMAN | Interleukin-13 receptor subunit alpha-1                                          | IL13RA1 |
| Not defined | sp    | P79522  | PRR3_HUMAN   | Proline-rich protein 3                                                           | PRR3    |
| Not defined | sp    | P80162  | CXCL6_HUMAN  | C-X-C motif chemokine 6                                                          | CXCL6   |
| Not defined | sp    | P80188  | NGAL_HUMAN   | Neutrophil gelatinase-associated lipocalin                                       | LCN2    |
| Not defined | sp    | P80217  | IN35_HUMAN   | Interferon-induced 35 kDa protein                                                | IFI35   |
| Not defined | sp    | P80404  | GABT_HUMAN   | 4-aminobutyrate aminotransferase, mitochondrial                                  | ABAT    |
| Not defined | sp    | P81605  | DCD_HUMAN    | Dermcidin                                                                        | DCD     |
| Not defined | sp    | P82663  | RT25_HUMAN   | 28S ribosomal protein S25, mitochondrial                                         | MRPS25  |
| Not defined | sp    | P82664  | RT10_HUMAN   | 28S ribosomal protein S10, mitochondrial                                         | MRPS10  |
| Not defined | sp    | P82673  | RT35_HUMAN   | 28S ribosomal protein S35, mitochondrial                                         | MRPS35  |
| Not defined | sp    | P82912  | RT11_HUMAN   | 28S ribosomal protein S11, mitochondrial                                         | MRPS11  |
| Not defined | sp    | P82914  | RT15_HUMAN   | 28S ribosomal protein S15, mitochondrial                                         | MRPS15  |
| Not defined | sp    | P82930  | RT34_HUMAN   | 28S ribosomal protein S34, mitochondrial                                         | MRPS34  |
| Not defined | sp    | P82932  | RT06_HUMAN   | 28S ribosomal protein S6, mitochondrial                                          | MRPS6   |
| Not defined | sp    | P82933  | RT09_HUMAN   | 28S ribosomal protein S9, mitochondrial                                          | MRPS9   |
| Not defined | sp    | P82970  | HMGNS_HUMAN  | High mobility group nucleosome-binding domain-containing protein 5               | HMGNS   |
| Not defined | sp    | P83110  | HTRA3_HUMAN  | Serine protease HTRA3                                                            | HTRA3   |
| Not defined | sp    | P83731  | RL24_HUMAN   | 60S ribosomal protein L24                                                        | RPL24   |
| Not defined | sp    | P83876  | TXN4A_HUMAN  | Thioredoxin-like protein 4A                                                      | TXNL4A  |
| Not defined | sp    | P83881  | RL36A_HUMAN  | 60S ribosomal protein L36a                                                       | RPL36A  |
| Not defined | sp    | P84074  | HPCA_HUMAN   | Neuron-specific calcium-binding protein hippocalin                               | HPCA    |
| Not defined | sp    | P84095  | RHOG_HUMAN   | Rho-related GTP-binding protein RhoG                                             | RHOG    |
| Not defined | sp    | P84098  | RL19_HUMAN   | 60S ribosomal protein L19                                                        | RPL19   |
| Not defined | sp    | P84101  | SERF2_HUMAN  | Small EDRK-rich factor 2                                                         | SERF2   |
| Not defined | sp    | P84157  | MXRA7_HUMAN  | Matrix-remodeling-associated protein 7                                           | MXRA7   |
| Not defined | sp    | P85037  | FOXK1_HUMAN  | Forkhead box protein K1                                                          | FOXK1   |
| Not defined | sp    | P98066  | TSG6_HUMAN   | Tumor necrosis factor-inducible gene 6 protein                                   | TNFAIP6 |
| Not defined | sp    | P98172  | EFNB1_HUMAN  | Ephrin-B1                                                                        | EFNB1   |
| Not defined | sp    | P98187  | CP4F8_HUMAN  | Cytochrome P450 4F8                                                              | CYP4F8  |
| Not defined | sp    | P98196  | ATP11A_HUMAN | Probable phospholipid-transporting ATPase H                                      | ATP11A  |
| Not defined | sp    | Q00005  | 2ABB_HUMAN   | Serine/threonine-protein phosphatase 2A55 kDa regulatory subunit B beta isoform  | PPP2R2B |
| Not defined | sp    | Q00266  | METK1_HUMAN  | S-adenosylmethionine synthase isoform type-1                                     | MAT1A   |
| Not defined | sp    | Q00325  | MPCP_HUMAN   | Phosphate carrier protein, mitochondrial                                         | SLC25A3 |
| Not defined | sp    | Q00341  | VIGLN_HUMAN  | Vigilin                                                                          | HDLBP   |
| Not defined | sp    | Q00526  | CDK3_HUMAN   | Cyclin-dependent kinase 3                                                        | CDK3    |
| Not defined | sp    | Q00534  | CDK6_HUMAN   | Cyclin-dependent kinase 6                                                        | CDK6    |

Supplementary Table 2.xlsx

| Cluster     | class | UNIPROT | UNIPROT_ID  | Description                                                             | GN       |
|-------------|-------|---------|-------------|-------------------------------------------------------------------------|----------|
| Not defined | sp    | Q00535  | CDK5_HUMAN  | Cyclin-dependent-like kinase 5                                          | CDK5     |
| Not defined | sp    | Q00536  | CDK16_HUMAN | Cyclin-dependent kinase 16                                              | CDK16    |
| Not defined | sp    | Q00537  | CDK17_HUMAN | Cyclin-dependent kinase 17                                              | CDK17    |
| Not defined | sp    | Q00577  | PURA_HUMAN  | Transcriptional activator protein Pur-alpha                             | PURA     |
| Not defined | sp    | Q00613  | HSF1_HUMAN  | Heat shock factor protein 1                                             | HSF1     |
| Not defined | sp    | Q00653  | NFKB2_HUMAN | Nuclear factor NF-kappa-B p100 subunit                                  | NFKB2    |
| Not defined | sp    | Q01415  | GALK2_HUMAN | N-acetylgalactosamine kinase                                            | GALK2    |
| Not defined | sp    | Q01433  | AMPD2_HUMAN | AMP deaminase 2                                                         | AMPD2    |
| Not defined | sp    | Q01459  | DIAC_HUMAN  | Di-N-acetylchitobiase                                                   | CTBS     |
| Not defined | sp    | Q01543  | FLI1_HUMAN  | Friend leukemia integration 1 transcription factor                      | FLI1     |
| Not defined | sp    | Q01581  | HMCS1_HUMAN | Hydroxymethylglutaryl-CoA synthase, cytoplasmic                         | HMGCS1   |
| Not defined | sp    | Q01638  | ILRL1_HUMAN | Interleukin-1 receptor-like 1                                           | ILRL1    |
| Not defined | sp    | Q01804  | OTUD4_HUMAN | OTU domain-containing protein 4                                         | OTUD4    |
| Not defined | sp    | Q01814  | AT2B2_HUMAN | Plasma membrane calcium-transporting ATPase 2                           | ATP2B2   |
| Not defined | sp    | Q01955  | CO4A3_HUMAN | Collagen alpha-3(IV) chain                                              | COL4A3   |
| Not defined | sp    | Q01968  | OCRL_HUMAN  | Inositol polyphosphate 5-phosphatase OCRL                               | OCRL     |
| Not defined | sp    | Q01970  | PLCB3_HUMAN | 1-phosphatidylinositol 4,5-bisphosphate phosphodiesterase beta-3        | PLCB3    |
| Not defined | sp    | Q01974  | ROR2_HUMAN  | Tyrosine-protein kinase transmembrane receptor ROR2                     | ROR2     |
| Not defined | sp    | Q01995  | TAGL_HUMAN  | Transgelin                                                              | TAGLN    |
| Not defined | sp    | Q02045  | MYL5_HUMAN  | Myosin light chain 5                                                    | MYL5     |
| Not defined | sp    | Q02083  | NAAA_HUMAN  | N-acyl ethanolamine-hydrolyzing acid amidase                            | NAAA     |
| Not defined | sp    | Q02108  | GCYA1_HUMAN | Guanylate cyclase soluble subunit alpha-1                               | GUCY1A1  |
| Not defined | sp    | Q02241  | KIF23_HUMAN | Kinesin-like protein KIF23                                              | KIF23    |
| Not defined | sp    | Q02246  | CNTN2_HUMAN | Contactin-2                                                             | CNTN2    |
| Not defined | sp    | Q02252  | MMSA_HUMAN  | Methylmalonate-semialdehyde dehydrogenase [acylating], mitochondrial    | ALDH6A1  |
| Not defined | sp    | Q02297  | NRG1_HUMAN  | Pro-neuregulin-1, membrane-bound isoform                                | NRG1     |
| Not defined | sp    | Q02325  | PLGB_HUMAN  | Plasminogen-like protein B                                              | PLGLB2   |
| Not defined | sp    | Q02388  | CO7A1_HUMAN | Collagen alpha-1(VII) chain                                             | COL7A1   |
| Not defined | sp    | Q02413  | DSG1_HUMAN  | Desmoglein-1                                                            | DSG1     |
| Not defined | sp    | Q02543  | RL18A_HUMAN | 60S ribosomal protein L18a                                              | RPL18A   |
| Not defined | sp    | Q02750  | MP2K1_HUMAN | Dual specificity mitogen-activated protein kinase kinase 1              | MAP2K1   |
| Not defined | sp    | Q02809  | PLOD1_HUMAN | Procollagen-lysine,2-oxoglutarate 5-dioxygenase 1                       | PLOD1    |
| Not defined | sp    | Q02846  | GUC2D_HUMAN | Retinal guanylyl cyclase 1                                              | GUCY2D   |
| Not defined | sp    | Q02880  | TOP2B_HUMAN | DNA topoisomerase 2-beta                                                | TOP2B    |
| Not defined | sp    | Q02930  | CREB5_HUMAN | Cyclic AMP-responsive element-binding protein 5                         | CREB5    |
| Not defined | sp    | Q02952  | AKA12_HUMAN | A-kinase anchor protein 12                                              | AKAP12   |
| Not defined | sp    | Q02978  | M2OM_HUMAN  | Mitochondrial 2-oxoglutarate/malate carrier protein                     | SLC25A11 |
| Not defined | sp    | Q03001  | DYST_HUMAN  | Dystonin                                                                | DST      |
| Not defined | sp    | Q03013  | GSTM4_HUMAN | Glutathione S-transferase Mu 4                                          | GSTM4    |
| Not defined | sp    | Q03111  | ENL_HUMAN   | Protein ENL                                                             | MLL1     |
| Not defined | sp    | Q03167  | TGFR3_HUMAN | Transforming growth factor beta receptor type 3                         | TGFR3    |
| Not defined | sp    | Q03405  | UPAR_HUMAN  | Urokinase plasminogen activator surface receptor                        | PLAUR    |
| Not defined | sp    | Q03692  | COAA1_HUMAN | Collagen alpha-1(X) chain                                               | COL10A1  |
| Not defined | sp    | Q03721  | KCNC4_HUMAN | Potassium voltage-gated channel subfamily C member 4                    | KCNC4    |
| Not defined | sp    | Q04206  | TF65_HUMAN  | Transcription factor p65                                                | RELA     |
| Not defined | sp    | Q04741  | EMX1_HUMAN  | Homeobox protein EMX1                                                   | EMX1     |
| Not defined | sp    | Q04828  | AK1C1_HUMAN | Aldo-keto reductase family 1 member C1                                  | AKR1C1   |
| Not defined | sp    | Q04912  | RON_HUMAN   | Macrophage-stimulating protein receptor                                 | MST1R    |
| Not defined | sp    | Q04941  | PLP2_HUMAN  | Proteolipid protein 2                                                   | PLP2     |
| Not defined | sp    | Q05397  | FAK1_HUMAN  | Focal adhesion kinase 1                                                 | PTK2     |
| Not defined | sp    | Q05932  | FOLC_HUMAN  | Folypolyglutamate synthase, mitochondrial                               | FFGS     |
| Not defined | sp    | Q05940  | VMAT2_HUMAN | Synaptic vesicular amine transporter                                    | SLC18A2  |
| Not defined | sp    | Q05B3   | EMAL5_HUMAN | Echinoderm microtubule-associated protein-like 5                        | EML5     |
| Not defined | sp    | Q06124  | PTN11_HUMAN | Tyrosine-protein phosphatase non-receptor type 11                       | PTPN11   |
| Not defined | sp    | Q06136  | KDSR_HUMAN  | 3-ketodihydroshingosine reductase                                       | KDSR     |
| Not defined | sp    | Q06187  | BTK_HUMAN   | Tyrosine-protein kinase BTK                                             | BTK      |
| Not defined | sp    | Q06210  | GFPT1_HUMAN | Glutamine-fructose-6-phosphate aminotransferase [isomerizing] 1         | GFPT1    |
| Not defined | sp    | Q06265  | EXOS9_HUMAN | Exosome complex component RRP45                                         | EXOSC9   |
| Not defined | sp    | Q06278  | AOXA_HUMAN  | Aldehyde oxidase                                                        | AOX1     |
| Not defined | sp    | Q06330  | SUH_HUMAN   | Recombining binding protein suppressor of hairless                      | RBP1     |
| Not defined | sp    | Q06546  | GABPA_HUMAN | GA-binding protein alpha chain                                          | GABPA    |
| Not defined | sp    | Q06587  | RING1_HUMAN | E3 ubiquitin-protein ligase RING1                                       | RING1    |
| Not defined | sp    | Q07002  | CDK18_HUMAN | Cyclin-dependent kinase 18                                              | CDK18    |
| Not defined | sp    | Q07157  | ZO1_HUMAN   | Tight junction protein ZO-1                                             | TJP1     |
| Not defined | sp    | Q07283  | TRHY_HUMAN  | Trichohyalin                                                            | TCFH     |
| Not defined | sp    | Q07343  | PDE4B_HUMAN | cAMP-specific 3',5'-cyclic phosphodiesterase 4B                         | PDE4B    |
| Not defined | sp    | Q07817  | B2CL1_HUMAN | Bcl-2-like protein 1                                                    | BCL2L1   |
| Not defined | sp    | Q07864  | DPOE1_HUMAN | DNA polymerase epsilon catalytic subunit A                              | POLE     |
| Not defined | sp    | Q07960  | RHG01_HUMAN | Rho GTPase-activating protein 1                                         | ARHGAP1  |
| Not defined | sp    | Q08174  | PCDH1_HUMAN | Protocadherin-1                                                         | PCDH1    |
| Not defined | sp    | Q08211  | DHX9_HUMAN  | ATP-dependent RNA helicase A                                            | DHX9     |
| Not defined | sp    | Q08257  | QOR_HUMAN   | Quinone oxidoreductase                                                  | CRY2     |
| Not defined | sp    | Q08345  | DDR1_HUMAN  | Epithelial discoidin domain-containing receptor 1                       | DDR1     |
| Not defined | sp    | Q08378  | GOGA3_HUMAN | Golgin subfamily A member 3                                             | GOLGA3   |
| Not defined | sp    | Q08379  | GOGA2_HUMAN | Golgin subfamily A member 2                                             | GOLGA2   |
| Not defined | sp    | Q08426  | ECHP_HUMAN  | Peroxisomal bifunctional enzyme                                         | EHHADH   |
| Not defined | sp    | Q08431  | MFGM_HUMAN  | Lactadherin                                                             | MFG8     |
| Not defined | sp    | Q08462  | ADCY2_HUMAN | Adenylate cyclase type 2                                                | ADCY2    |
| Not defined | sp    | Q08477  | CP4F3_HUMAN | Cytochrome P450 4F3                                                     | CYP4F3   |
| Not defined | sp    | Q08499  | PDE4D_HUMAN | cAMP-specific 3',5'-cyclic phosphodiesterase 4D                         | PDE4D    |
| Not defined | sp    | Q08623  | HDHD1_HUMAN | Pseudouridine-5'-phosphatase                                            | PUDP     |
| Not defined | sp    | Q08722  | CD47_HUMAN  | Leukocyte surface antigen CD47                                          | CD47     |
| Not defined | sp    | Q08945  | SSRP1_HUMAN | FACT complex subunit SSRP1                                              | SSRP1    |
| Not defined | sp    | Q08AF3  | SLFN5_HUMAN | Schlafen family member 5                                                | SLFN5    |
| Not defined | sp    | Q08AH3  | ACS2A_HUMAN | Acyl-coenzyme A synthetase ACSM2A, mitochondrial                        | ACSM2A   |
| Not defined | sp    | Q08J23  | NSUN2_HUMAN | RNA cytosine C(5)-methyltransferase NSUN2                               | NSUN2    |
| Not defined | sp    | Q09161  | NCBP1_HUMAN | Nuclear cap-binding protein subunit 1                                   | NCBP1    |
| Not defined | sp    | Q09328  | MGTA5_HUMAN | Alpha-1,6-mannosylglycoprotein 6-beta-N-acetylglucosaminyltransferase A | MGAT5    |
| Not defined | sp    | Q09428  | ABCC8_HUMAN | ATP-binding cassette sub-family C member 8                              | ABCC8    |
| Not defined | sp    | Q09MP3  | R51A2_HUMAN | RAD51-associated protein 2                                              | RAD51AP2 |

Supplementary Table 2.xlsx

| Cluster     | class | UNIPROT | UNIPROT_ID    | Description                                                                                   | GN       |
|-------------|-------|---------|---------------|-----------------------------------------------------------------------------------------------|----------|
| Not defined | sp    | Q0D215  | IFFO1_HUMAN   | Intermediate filament family orphan 1                                                         | IFFO1    |
| Not defined | sp    | Q0D215  | ZN763_HUMAN   | Zinc finger protein 763                                                                       | ZN763    |
| Not defined | sp    | Q0IIM8  | TBC8B_HUMAN   | TBC1 domain family member 8B                                                                  | TBC1D8B  |
| Not defined | sp    | Q0JRZ9  | FCHO2_HUMAN   | F-BAR domain only protein 2                                                                   | FCHO2    |
| Not defined | sp    | Q0VDD8  | DYH14_HUMAN   | Dynein heavy chain 14, axonemal                                                               | DNAH14   |
| Not defined | sp    | Q0VDF9  | HSP7E_HUMAN   | Heat shock 70 kDa protein 14                                                                  | HSPA14   |
| Not defined | sp    | Q0VVG4  | SCRN3_HUMAN   | Secernin-3                                                                                    | SCRN3    |
| Not defined | sp    | Q0VF49  | K2012_HUMAN   | Uncharacterized protein KIAA2012                                                              | KIAA2012 |
| Not defined | sp    | Q0VGL1  | LTOR4_HUMAN   | Regulator complex protein LAMTOR4                                                             | LAMTOR4  |
| Not defined | sp    | Q0ZGT2  | NEXN_HUMAN    | Nexilin                                                                                       | NEXN     |
| Not defined | sp    | Q10469  | MGAT2_HUMAN   | Alpha-1,6-mannosyl-glycoprotein 2-beta-N-acetylglucosaminyltransferase                        | MGAT2    |
| Not defined | sp    | Q10471  | GALT2_HUMAN   | Polypeptide N-acetylgalactosaminyltransferase 2                                               | GALT2    |
| Not defined | sp    | Q10567  | AP1B1_HUMAN   | AP-1 complex subunit beta-1                                                                   | AP1B1    |
| Not defined | sp    | Q10570  | CPSF1_HUMAN   | Cleavage and polyadenylation specificity factor subunit 1                                     | CPSF1    |
| Not defined | sp    | Q10589  | BST2_HUMAN    | Bone marrow stromal antigen 2                                                                 | BST2     |
| Not defined | sp    | Q11128  | FUT5_HUMAN    | Alpha-(1,3)-fucosyltransferase 5                                                              | FUT5     |
| Not defined | sp    | Q12765  | SCRN1_HUMAN   | Secernin-1                                                                                    | SCRN1    |
| Not defined | sp    | Q12768  | WASC5_HUMAN   | WASH complex subunit 5                                                                        | WASHC5   |
| Not defined | sp    | Q12789  | TF3C1_HUMAN   | General transcription factor 3C polypeptide 1                                                 | GTF3C1   |
| Not defined | sp    | Q12792  | TWF1_HUMAN    | Twinfilin-1                                                                                   | TWF1     |
| Not defined | sp    | Q12798  | CETN1_HUMAN   | Centrin-1                                                                                     | CETN1    |
| Not defined | sp    | Q12800  | TFCP2_HUMAN   | Alpha-globin transcription factor CP2                                                         | TFCP2    |
| Not defined | sp    | Q12805  | FBLN3_HUMAN   | EGF-containing fibulin-like extracellular matrix protein 1                                    | EFEMP1   |
| Not defined | sp    | Q12824  | SNF5_HUMAN    | SWI/SNF-related matrix-associated actin-dependent regulator of chromatin subfamily B member 1 | SMARCB1  |
| Not defined | sp    | Q12830  | BPTF_HUMAN    | Nucleosome-remodeling factor subunit BPTF                                                     | BPTF     |
| Not defined | sp    | Q12840  | KIF5A_HUMAN   | Kinesin heavy chain isoform 5A                                                                | KIF5A    |
| Not defined | sp    | Q12846  | STX4_HUMAN    | Syntaxin-4                                                                                    | STX4     |
| Not defined | sp    | Q12849  | GRSF1_HUMAN   | G-rich sequence factor 1                                                                      | GRSF1    |
| Not defined | sp    | Q12851  | MAP4K2_HUMAN  | Mitogen-activated protein kinase kinase kinase kinase 2                                       | MAP4K2   |
| Not defined | sp    | Q12857  | NFIA_HUMAN    | Nuclear factor 1 A-type                                                                       | NFIA     |
| Not defined | sp    | Q12872  | SFSWA_HUMAN   | Splicing factor, suppressor of white-apricot homolog                                          | SFSWAP   |
| Not defined | sp    | Q12873  | CHD3_HUMAN    | Chromodomain-helicase-DNA-binding protein 3                                                   | CHD3     |
| Not defined | sp    | Q12882  | DPYD_HUMAN    | Dihydropyrimidine dehydrogenase [NADP(+)]                                                     | DPYD     |
| Not defined | sp    | Q12884  | SEPR_HUMAN    | Prolyl endopeptidase FAP                                                                      | FAP      |
| Not defined | sp    | Q12888  | TP53BP1_HUMAN | TP53-binding protein 1                                                                        | TP53BP1  |
| Not defined | sp    | Q12899  | TRIM26_HUMAN  | Tripartite motif-containing protein 26                                                        | TRIM26   |
| Not defined | sp    | Q12913  | PTPRJ_HUMAN   | Receptor-type tyrosine-protein phosphatase eta                                                | PTPRJ    |
| Not defined | sp    | Q12926  | ELAVL2_HUMAN  | ELAV-like protein 2                                                                           | ELAVL2   |
| Not defined | sp    | Q12955  | ANK3_HUMAN    | Ankyrin-3                                                                                     | ANK3     |
| Not defined | sp    | Q12959  | DLG1_HUMAN    | Disks large homolog 1                                                                         | DLG1     |
| Not defined | sp    | Q12962  | TAF10_HUMAN   | Transcription initiation factor TFIID subunit 10                                              | TAF10    |
| Not defined | sp    | Q12965  | MYO1E_HUMAN   | Unconventional myosin-le                                                                      | MYO1E    |
| Not defined | sp    | Q12974  | TP4A2_HUMAN   | Protein tyrosine phosphatase type IVA 2                                                       | PTPA42   |
| Not defined | sp    | Q12979  | ABR_HUMAN     | Active breakpoint cluster region-related protein                                              | ABR      |
| Not defined | sp    | Q12981  | SEC20_HUMAN   | Vesicle transport protein SEC20                                                               | BNIP1    |
| Not defined | sp    | Q12996  | CSTF3_HUMAN   | Cleavage stimulation factor subunit 3                                                         | CSTF3    |
| Not defined | sp    | Q13033  | STRN3_HUMAN   | Striatin-3                                                                                    | STRN3    |
| Not defined | sp    | Q13043  | STK4_HUMAN    | Serine/threonine-protein kinase 4                                                             | STK4     |
| Not defined | sp    | Q13045  | FLII_HUMAN    | Protein flightless-1 homolog                                                                  | FLII     |
| Not defined | sp    | Q13057  | COASY_HUMAN   | Bifunctional coenzyme A synthase                                                              | COASY    |
| Not defined | sp    | Q13065  | GAGE1_HUMAN   | G antigen 1                                                                                   | GAGE1    |
| Not defined | sp    | Q13066  | GAGE2B_HUMAN  | G antigen 2B/2C                                                                               | GAGE2B   |
| Not defined | sp    | Q13069  | GAGE5_HUMAN   | G antigen 5                                                                                   | GAGE5    |
| Not defined | sp    | Q13070  | GAGE6_HUMAN   | G antigen 6                                                                                   | GAGE6    |
| Not defined | sp    | Q13084  | MRPL28_HUMAN  | 39S ribosomal protein L28, mitochondrial                                                      | MRPL28   |
| Not defined | sp    | Q13085  | ACACA_HUMAN   | Acetyl-CoA carboxylase 1                                                                      | ACACA    |
| Not defined | sp    | Q13098  | CSN1_HUMAN    | COP9 signalosome complex subunit 1                                                            | GPS1     |
| Not defined | sp    | Q13103  | SPP24_HUMAN   | Secreted phosphoprotein 24                                                                    | SPP2     |
| Not defined | sp    | Q13107  | UBP4_HUMAN    | Ubiquitin carboxyl-terminal hydrolase 4                                                       | USP4     |
| Not defined | sp    | Q13112  | CAF1B_HUMAN   | Chromatin assembly factor 1 subunit B                                                         | CAF1B    |
| Not defined | sp    | Q13123  | RED_HUMAN     | Protein Red                                                                                   | IK       |
| Not defined | sp    | Q13126  | MTAP_HUMAN    | S-methyl-5'-thioadenosine phosphorylase                                                       | MTAP     |
| Not defined | sp    | Q13127  | REST_HUMAN    | RE1-silencing transcription factor                                                            | REST     |
| Not defined | sp    | Q13131  | AAPK1_HUMAN   | 5'-AMP-activated protein kinase catalytic subunit alpha-1                                     | PRKAA1   |
| Not defined | sp    | Q13144  | EIF2B5_HUMAN  | Translation initiation factor eIF-2B subunit epsilon                                          | EIF2B5   |
| Not defined | sp    | Q13148  | TARDBP_HUMAN  | TAR DNA-binding protein 43                                                                    | TARDBP   |
| Not defined | sp    | Q13153  | PAK1_HUMAN    | Serine/threonine-protein kinase PAK 1                                                         | PAK1     |
| Not defined | sp    | Q13155  | AIMP2_HUMAN   | Aminoacyl tRNA synthase complex-interacting multifunctional protein 2                         | AIMP2    |
| Not defined | sp    | Q13158  | FADD_HUMAN    | FAS-associated death domain protein                                                           | FADD     |
| Not defined | sp    | Q13177  | PAK2_HUMAN    | Serine/threonine-protein kinase PAK 2                                                         | PAK2     |
| Not defined | sp    | Q13188  | STK3_HUMAN    | Serine/threonine-protein kinase 3                                                             | STK3     |
| Not defined | sp    | Q13190  | STX5_HUMAN    | Syntaxin-5                                                                                    | STX5     |
| Not defined | sp    | Q13200  | PSMD2_HUMAN   | 26S proteasome non-ATPase regulatory subunit 2                                                | PSMD2    |
| Not defined | sp    | Q13206  | DDX10_HUMAN   | Probable ATP-dependent RNA helicase DDX10                                                     | DDX10    |
| Not defined | sp    | Q13217  | DNJC3_HUMAN   | DnaJ homolog subfamily C member 3                                                             | DNJC3    |
| Not defined | sp    | Q13228  | SBP1_HUMAN    | Methanethiol oxidase                                                                          | SELENBP1 |
| Not defined | sp    | Q13231  | CHIT1_HUMAN   | Chitotriosidase-1                                                                             | CHIT1    |
| Not defined | sp    | Q13232  | NDK3_HUMAN    | Nucleoside diphosphate kinase 3                                                               | NME3     |
| Not defined | sp    | Q13257  | MD2L1_HUMAN   | Mitotic spindle assembly checkpoint protein MAD2A                                             | MAD2L1   |
| Not defined | sp    | Q13263  | TIF1B_HUMAN   | Transcription intermediary factor 1-beta                                                      | TRIM28   |
| Not defined | sp    | Q13268  | DHRS2_HUMAN   | Dehydrogenase/reductase SDR family member 2, mitochondrial                                    | DHRS2    |
| Not defined | sp    | Q13277  | STX3_HUMAN    | Syntaxin-3                                                                                    | STX3     |
| Not defined | sp    | Q13287  | NMI_HUMAN     | N-myc-interactor                                                                              | NMI      |
| Not defined | sp    | Q13291  | SLAMF1_HUMAN  | Signaling lymphocytic activation molecule                                                     | SLAMF1   |
| Not defined | sp    | Q13303  | KCAB2_HUMAN   | Voltage-gated potassium channel subunit beta-2                                                | KCNAB2   |
| Not defined | sp    | Q13304  | GPR17_HUMAN   | Uracil nucleotide/cysteinyl leukotriene receptor                                              | GPR17    |
| Not defined | sp    | Q13308  | PTK7_HUMAN    | Inactive tyrosine-protein kinase 7                                                            | PTK7     |
| Not defined | sp    | Q13315  | ATM_HUMAN     | Serine-protein kinase ATM                                                                     | ATM      |
| Not defined | sp    | Q13330  | MTA1_HUMAN    | Metastasis-associated protein MTA1                                                            | MTA1     |
| Not defined | sp    | Q13332  | PTPRS_HUMAN   | Receptor-type tyrosine-protein phosphatase 5                                                  | PTPRS    |

Supplementary Table 2.xlsx

| Cluster     | class | UNIPROT | UNIPROT_ID   | Description                                                      | GN      |
|-------------|-------|---------|--------------|------------------------------------------------------------------|---------|
| Not defined | sp    | Q13356  | PPIL2_HUMAN  | RING-type E3 ubiquitin-protein ligase PPIL2                      | PPIL2   |
| Not defined | sp    | Q13367  | AP3B2_HUMAN  | AP-3 complex subunit beta-2                                      | AP3B2   |
| Not defined | sp    | Q13402  | MYO7A_HUMAN  | Unconventional myosin-VIIa                                       | MYO7A   |
| Not defined | sp    | Q13416  | ORC2_HUMAN   | Origin recognition complex subunit 2                             | ORC2    |
| Not defined | sp    | Q13418  | ILK_HUMAN    | Integrin-linked protein kinase                                   | ILK     |
| Not defined | sp    | Q13423  | NNTM_HUMAN   | NAD(P) transhydrogenase, mitochondrial                           | NNT     |
| Not defined | sp    | Q13426  | XRCC4_HUMAN  | DNA repair protein XRCC4                                         | XRCC4   |
| Not defined | sp    | Q13427  | PIIG_HUMAN   | Peptidyl-prolyl cis-trans isomerase G                            | PIIG    |
| Not defined | sp    | Q13432  | U119A_HUMAN  | Protein unc-119 homolog A                                        | UNC119  |
| Not defined | sp    | Q13433  | S39A6_HUMAN  | Zinc transporter ZIP6                                            | SLC39A6 |
| Not defined | sp    | Q13451  | FKBP5_HUMAN  | Peptidyl-prolyl cis-trans isomerase FKBP5                        | FKBP5   |
| Not defined | sp    | Q13472  | TOP3A_HUMAN  | DNA topoisomerase 3-alpha                                        | TOP3A   |
| Not defined | sp    | Q13492  | PICAL_HUMAN  | Phosphatidylinositol-binding clathrin assembly protein           | PICALM  |
| Not defined | sp    | Q13501  | SQSTM1_HUMAN | Sequestosome-1                                                   | SQSTM1  |
| Not defined | sp    | Q13503  | MED21_HUMAN  | Mediator of RNA polymerase II transcription subunit 21           | MED21   |
| Not defined | sp    | Q13505  | MTX1_HUMAN   | Metaxin-1                                                        | MTX1    |
| Not defined | sp    | Q13523  | PRP4B_HUMAN  | Serine/threonine-protein kinase PRP4 homolog                     | PRPF4B  |
| Not defined | sp    | Q13535  | ATR_HUMAN    | Serine/threonine-protein kinase ATR                              | ATR     |
| Not defined | sp    | Q13547  | HDAC1_HUMAN  | Histone deacetylase 1                                            | HDAC1   |
| Not defined | sp    | Q13564  | ULA1_HUMAN   | NEDD8-activating enzyme E1 regulatory subunit                    | NAE1    |
| Not defined | sp    | Q13573  | SNW1_HUMAN   | SNW domain-containing protein 1                                  | SNW1    |
| Not defined | sp    | Q13586  | STIM1_HUMAN  | Stromal interaction molecule 1                                   | STIM1   |
| Not defined | sp    | Q13596  | SNX1_HUMAN   | Sorting nexin-1                                                  | SNX1    |
| Not defined | sp    | Q13601  | KRR1_HUMAN   | KRR1 small subunit processome component homolog                  | KRR1    |
| Not defined | sp    | Q13610  | PWP1_HUMAN   | Periodic tryptophan protein 1 homolog                            | PWP1    |
| Not defined | sp    | Q13613  | MTMR1_HUMAN  | Myotubularin-related protein 1                                   | MTMR1   |
| Not defined | sp    | Q13616  | CUL1_HUMAN   | Cullin-1                                                         | CUL1    |
| Not defined | sp    | Q13617  | CUL2_HUMAN   | Cullin-2                                                         | CUL2    |
| Not defined | sp    | Q13618  | CUL3_HUMAN   | Cullin-3                                                         | CUL3    |
| Not defined | sp    | Q13635  | PTCH1_HUMAN  | Protein patched homolog 1                                        | PTCH1   |
| Not defined | sp    | Q13636  | RAB31_HUMAN  | Ras-related protein Rab-31                                       | RAB31   |
| Not defined | sp    | Q13642  | FHL1_HUMAN   | Four and a half LIM domains protein 1                            | FHL1    |
| Not defined | sp    | Q13643  | FHL3_HUMAN   | Four and a half LIM domains protein 3                            | FHL3    |
| Not defined | sp    | Q13685  | AAMP_HUMAN   | Angio-associated migratory cell protein                          | AAMP    |
| Not defined | sp    | Q13733  | AT1A4_HUMAN  | Sodium/potassium-transporting ATPase subunit alpha-4             | ATP1A4  |
| Not defined | sp    | Q13751  | LAMB3_HUMAN  | Laminin subunit beta-3                                           | LAMB3   |
| Not defined | sp    | Q13753  | LAMC2_HUMAN  | Laminin subunit gamma-2                                          | LAMC2   |
| Not defined | sp    | Q13769  | THOC5_HUMAN  | THO complex subunit 5 homolog                                    | THOC5   |
| Not defined | sp    | Q13797  | ITGA9_HUMAN  | Integrin alpha-9                                                 | ITGA9   |
| Not defined | sp    | Q13822  | ENPP2_HUMAN  | Ectonucleotide pyrophosphatase/phosphodiesterase family member 2 | ENPP2   |
| Not defined | sp    | Q13823  | NOG2_HUMAN   | Nucleolar GTP-binding protein 2                                  | GNL2    |
| Not defined | sp    | Q13825  | AUHM_HUMAN   | Methylglutaconyl-CoA hydratase, mitochondrial                    | AUH     |
| Not defined | sp    | Q13884  | SNTB1_HUMAN  | Beta-1-syntrophin                                                | SNTB1   |
| Not defined | sp    | Q13895  | BYST_HUMAN   | Bystin                                                           | BYSL    |
| Not defined | sp    | Q13901  | C1D_HUMAN    | Nuclear nucleic acid-binding protein C1D                         | C1D     |
| Not defined | sp    | Q13907  | IDI1_HUMAN   | Isopentenyl-diphosphate Delta-isomerase 1                        | IDI1    |
| Not defined | sp    | Q13938  | CAYP1_HUMAN  | Calcyphosin                                                      | CAPS    |
| Not defined | sp    | Q13951  | PEBB_HUMAN   | Core-binding factor subunit beta                                 | CBFB    |
| Not defined | sp    | Q13952  | NFYC_HUMAN   | Nuclear transcription factor Y subunit gamma                     | NFYC    |
| Not defined | sp    | Q14003  | KCNC3_HUMAN  | Potassium voltage-gated channel subfamily C member 3             | KCNC3   |
| Not defined | sp    | Q14004  | CDK13_HUMAN  | Cyclin-dependent kinase 13                                       | CDK13   |
| Not defined | sp    | Q14008  | CKAP5_HUMAN  | Cytoskeleton-associated protein 5                                | CKAP5   |
| Not defined | sp    | Q14031  | COL4A6_HUMAN | Collagen alpha-6(IV) chain                                       | COL4A6  |
| Not defined | sp    | Q14061  | COX17_HUMAN  | Cytochrome c oxidase copper chaperone                            | COX17   |
| Not defined | sp    | Q14116  | IL18_HUMAN   | Interleukin-18                                                   | IL18    |
| Not defined | sp    | Q14117  | DPYS_HUMAN   | Dihydropyrimidinase                                              | DPYS    |
| Not defined | sp    | Q14118  | DAG1_HUMAN   | Dystroglycan                                                     | DAG1    |
| Not defined | sp    | Q14126  | DSG2_HUMAN   | Desmoglein-2                                                     | DSG2    |
| Not defined | sp    | Q14134  | TRIM29_HUMAN | Tripartite motif-containing protein 29                           | TRIM29  |
| Not defined | sp    | Q14137  | BOP1_HUMAN   | Ribosome biogenesis protein BOP1                                 | BOP1    |
| Not defined | sp    | Q14151  | SAFB2_HUMAN  | Scaffold attachment factor B2                                    | SAFB2   |
| Not defined | sp    | Q14152  | EIF3A_HUMAN  | Eukaryotic translation initiation factor 3 subunit A             | EIF3A   |
| Not defined | sp    | Q14160  | SCRIB_HUMAN  | Protein scribble homolog                                         | SCRIB   |
| Not defined | sp    | Q14185  | DOCK1_HUMAN  | Dedicator of cytokinesis protein 1                               | DOCK1   |
| Not defined | sp    | Q14192  | FHL2_HUMAN   | Four and a half LIM domains protein 2                            | FHL2    |
| Not defined | sp    | Q14194  | DPYL1_HUMAN  | Dihydropyrimidinase-related protein 1                            | CRMP1   |
| Not defined | sp    | Q14195  | DPYL3_HUMAN  | Dihydropyrimidinase-related protein 3                            | DPYSL3  |
| Not defined | sp    | Q14202  | ZMYM3_HUMAN  | Zinc finger MYM-type protein 3                                   | ZMYM3   |
| Not defined | sp    | Q14203  | DCTN1_HUMAN  | Dynactin subunit 1                                               | DCTN1   |
| Not defined | sp    | Q14204  | DYHC1_HUMAN  | Cytoplasmic dynein 1 heavy chain 1                               | DYNC1H1 |
| Not defined | sp    | Q14210  | LY6D_HUMAN   | Lymphocyte antigen 6D                                            | LY6D    |
| Not defined | sp    | Q14232  | EI2BA_HUMAN  | Translation initiation factor eIF-2B subunit alpha               | EIF2B1  |
| Not defined | sp    | Q14241  | ELOA1_HUMAN  | Elongin-A                                                        | ELOA    |
| Not defined | sp    | Q14244  | MAP7_HUMAN   | Ensconsin                                                        | MAP7    |
| Not defined | sp    | Q14249  | NUCG_HUMAN   | Endonuclease G, mitochondrial                                    | ENDOG   |
| Not defined | sp    | Q14257  | RCN2_HUMAN   | Reticulocalbin-2                                                 | RCN2    |
| Not defined | sp    | Q14258  | TRIM25_HUMAN | E3 ubiquitin/ISG15 ligase TRIM25                                 | TRIM25  |
| Not defined | sp    | Q14289  | FAK2_HUMAN   | Protein-tyrosine kinase 2-beta                                   | PTK2B   |
| Not defined | sp    | Q14318  | FKBP8_HUMAN  | Peptidyl-prolyl cis-trans isomerase FKBP8                        | FKBP8   |
| Not defined | sp    | Q14353  | GAMT_HUMAN   | Guanidinoacetate N-methyltransferase                             | GAMT    |
| Not defined | sp    | Q14376  | GALE_HUMAN   | UDP-glucose 4-epimerase                                          | GALE    |
| Not defined | sp    | Q14390  | GGTL2_HUMAN  | Glutathione hydrolase light chain 2                              | GGTL2   |
| Not defined | sp    | Q14432  | PDE3A_HUMAN  | cGMP-inhibited 3',5'-cyclic phosphodiesterase A                  | PDE3A   |
| Not defined | sp    | Q14435  | GALT3_HUMAN  | Polypeptide N-acetylgalactosaminyltransferase 3                  | GALT3   |
| Not defined | sp    | Q14494  | NFE2L1_HUMAN | Endoplasmic reticulum membrane sensor NFE2L1                     | NFE2L1  |
| Not defined | sp    | Q14500  | KCNJ12_HUMAN | ATP-sensitive inward rectifier potassium channel 12              | KCNJ12  |
| Not defined | sp    | Q14512  | FGFBP1_HUMAN | Fibroblast growth factor-binding protein 1                       | FGFBP1  |
| Not defined | sp    | Q14517  | FAT1_HUMAN   | Protocadherin Fat 1                                              | FAT1    |
| Not defined | sp    | Q14520  | HABP2_HUMAN  | Hyaluronan-binding protein 2                                     | HABP2   |
| Not defined | sp    | Q14554  | PDI5A_HUMAN  | Protein disulfide-isomerase A5                                   | PDI5A   |

Supplementary Table 2.xlsx

| Cluster     | class | UNIPROT | UNIPROT_ID   | Description                                                                                   | GN       |
|-------------|-------|---------|--------------|-----------------------------------------------------------------------------------------------|----------|
| Not defined | sp    | Q14558  | KPRA_HUMAN   | Phosphoribosyl pyrophosphate synthase-associated protein 1                                    | PRPSAP1  |
| Not defined | sp    | Q14562  | DHX8_HUMAN   | ATP-dependent RNA helicase DHX8                                                               | DHX8     |
| Not defined | sp    | Q14563  | SEM3A_HUMAN  | Semaphorin-3A                                                                                 | SEMA3A   |
| Not defined | sp    | Q14566  | MCM6_HUMAN   | DNA replication licensing factor MCM6                                                         | MCM6     |
| Not defined | sp    | Q14571  | ITPR2_HUMAN  | Inositol 1,4,5-trisphosphate receptor type 2                                                  | ITPR2    |
| Not defined | sp    | Q14653  | IRF3_HUMAN   | Interferon regulatory factor 3                                                                | IRF3     |
| Not defined | sp    | Q14657  | LAGE3_HUMAN  | EKC/KEOPS complex subunit LAGE3                                                               | LAGE3    |
| Not defined | sp    | Q14667  | KO100_HUMAN  | Protein KIAA0100                                                                              | KIAA0100 |
| Not defined | sp    | Q14671  | PUM1_HUMAN   | Pumilio homolog 1                                                                             | PUM1     |
| Not defined | sp    | Q14676  | MDC1_HUMAN   | Mediator of DNA damage checkpoint protein 1                                                   | MDC1     |
| Not defined | sp    | Q14677  | EPN4_HUMAN   | Clathrin interactor 1                                                                         | CLINT1   |
| Not defined | sp    | Q14678  | KANK1_HUMAN  | KN motif and ankyrin repeat domain-containing protein 1                                       | KANK1    |
| Not defined | sp    | Q14679  | TTL4_HUMAN   | Tubulin polyglutamylase TTL4                                                                  | TTL4     |
| Not defined | sp    | Q14680  | MELK_HUMAN   | Maternal embryonic leucine zipper kinase                                                      | MELK     |
| Not defined | sp    | Q14683  | SMC1A_HUMAN  | Structural maintenance of chromosomes protein 1A                                              | SMC1A    |
| Not defined | sp    | Q14691  | PSF1_HUMAN   | DNA replication complex GINS protein PSF1                                                     | GINS1    |
| Not defined | sp    | Q14693  | LPIN1_HUMAN  | Phosphatidate phosphatase LPIN1                                                               | LPIN1    |
| Not defined | sp    | Q14694  | UBP10_HUMAN  | Ubiquitin carboxyl-terminal hydrolase 10                                                      | USP10    |
| Not defined | sp    | Q14703  | MBTP1_HUMAN  | Membrane-bound transcription factor site-1 protease                                           | MBTPS1   |
| Not defined | sp    | Q14721  | KCNB1_HUMAN  | Potassium voltage-gated channel subfamily B member 1                                          | KCNB1    |
| Not defined | sp    | Q14722  | KCAB1_HUMAN  | Voltage-gated potassium channel subunit beta-1                                                | KCNAB1   |
| Not defined | sp    | Q14738  | 2A5D_HUMAN   | Serine/threonine-protein phosphatase 2A 56 kDa regulatory subunit delta isoform               | PPP2R5D  |
| Not defined | sp    | Q14739  | LBR_HUMAN    | Delta(14)-sterol reductase LBR                                                                | LBR      |
| Not defined | sp    | Q14789  | GOLGB1_HUMAN | Golgin subfamily B member 1                                                                   | GOLGB1   |
| Not defined | sp    | Q14790  | CASP8_HUMAN  | Caspase-8                                                                                     | CASP8    |
| Not defined | sp    | Q14793  | NAA30_HUMAN  | N-alpha-acetyltransferase 30                                                                  | NAA30    |
| Not defined | sp    | Q14802  | FXD3_HUMAN   | FXD domain-containing ion transport regulator 3                                               | FXD3     |
| Not defined | sp    | Q14839  | CHD4_HUMAN   | Chromodomain-helicase-DNA-binding protein 4                                                   | CHD4     |
| Not defined | sp    | Q14919  | NC2A_HUMAN   | Dr1-associated corepressor                                                                    | DRAP1    |
| Not defined | sp    | Q14938  | NFIX_HUMAN   | Nuclear factor 1 X-type                                                                       | NFIX     |
| Not defined | sp    | Q14943  | KI351_HUMAN  | Killer cell immunoglobulin-like receptor 3DS1                                                 | KIR3DS1  |
| Not defined | sp    | Q14956  | GNPMB_HUMAN  | Transmembrane glycoprotein NMB                                                                | GNPMB    |
| Not defined | sp    | Q14980  | NUMA1_HUMAN  | Nuclear mitotic apparatus protein 1                                                           | NUMA1    |
| Not defined | sp    | Q14997  | PSME4_HUMAN  | Proteasome activator complex subunit 4                                                        | PSME4    |
| Not defined | sp    | Q14999  | CUL7_HUMAN   | Cullin-7                                                                                      | CUL7     |
| Not defined | sp    | Q149M9  | NWD1_HUMAN   | NACHT domain- and WD repeat-containing protein 1                                              | NWD1     |
| Not defined | sp    | Q149N8  | SHPRH_HUMAN  | E3 ubiquitin-protein ligase SHPRH                                                             | SHPRH    |
| Not defined | sp    | Q148N4  | SLMAP_HUMAN  | Sarcolemmal membrane-associated protein                                                       | SLMAP    |
| Not defined | sp    | Q14C86  | GAPD1_HUMAN  | GTPase-activating protein and VPS9 domain-containing protein 1                                | GAPVD1   |
| Not defined | sp    | Q14CN2  | CLCA4_HUMAN  | Calcium-activated chloride channel regulator 4                                                | CLCA4    |
| Not defined | sp    | Q14DG7  | T132B_HUMAN  | Transmembrane protein 132B                                                                    | TMEM132B |
| Not defined | sp    | Q15003  | CND2_HUMAN   | Condensin complex subunit 2                                                                   | NCAPH    |
| Not defined | sp    | Q15005  | SPCS2_HUMAN  | Signal peptidase complex subunit 2                                                            | SPCS2    |
| Not defined | sp    | Q15008  | PSMD6_HUMAN  | 26S proteasome non-ATPase regulatory subunit 6                                                | PSMD6    |
| Not defined | sp    | Q15011  | HERP1_HUMAN  | Homocysteine-responsive endoplasmic reticulum-resident ubiquitin-like domain member 1 protein | HERPUD1  |
| Not defined | sp    | Q15018  | ABRX2_HUMAN  | BRISC complex subunit Abraxas 2                                                               | ABRAXAS2 |
| Not defined | sp    | Q15020  | SART3_HUMAN  | Squamous cell carcinoma antigen recognized by T-cells 3                                       | SART3    |
| Not defined | sp    | Q15027  | ACAP1_HUMAN  | Arf-GAP with coiled-coil, ANK repeat and PH domain-containing protein 1                       | ACAP1    |
| Not defined | sp    | Q15036  | SNX17_HUMAN  | Sorting nexin-17                                                                              | SNX17    |
| Not defined | sp    | Q15041  | AR6P1_HUMAN  | ADP-ribosylation factor-like protein 6-interacting protein 1                                  | ARL6IP1  |
| Not defined | sp    | Q15047  | SETB1_HUMAN  | Histone-lysine N-methyltransferase SETDB1                                                     | SETDB1   |
| Not defined | sp    | Q15050  | RRS1_HUMAN   | Ribosome biogenesis regulatory protein homolog                                                | RRS1     |
| Not defined | sp    | Q15051  | IQCB1_HUMAN  | IQ calmodulin-binding motif-containing protein 1                                              | IQCB1    |
| Not defined | sp    | Q15052  | ARHG6_HUMAN  | Rho guanine nucleotide exchange factor 6                                                      | ARHGEF6  |
| Not defined | sp    | Q15061  | WDR43_HUMAN  | WD repeat-containing protein 43                                                               | WDR43    |
| Not defined | sp    | Q15070  | OXA1L_HUMAN  | Mitochondrial inner membrane protein OXA1L                                                    | OXA1L    |
| Not defined | sp    | Q15075  | EEA1_HUMAN   | Early endosome antigen 1                                                                      | EEA1     |
| Not defined | sp    | Q15113  | PCOCE1_HUMAN | Procollagen C-endopeptidase enhancer 1                                                        | PCOCE    |
| Not defined | sp    | Q15125  | EBP_HUMAN    | 3-beta-hydroxysteroid-Delta(8),Delta(7)-isomerase                                             | EBP      |
| Not defined | sp    | Q15126  | PMVK_HUMAN   | Phosphomevalonate kinase                                                                      | PMVK     |
| Not defined | sp    | Q15149  | PLEC_HUMAN   | Plectin                                                                                       | PLEC     |
| Not defined | sp    | Q15154  | PCM1_HUMAN   | Pericentriolar material 1 protein                                                             | PCM1     |
| Not defined | sp    | Q15165  | PON2_HUMAN   | Serum paraoxonase/arylesterase 2                                                              | PON2     |
| Not defined | sp    | Q15223  | NECT1_HUMAN  | Nectin-1                                                                                      | NECTIN1  |
| Not defined | sp    | Q15262  | PTPRK_HUMAN  | Receptor-type tyrosine-protein phosphatase kappa                                              | PTPRK    |
| Not defined | sp    | Q15269  | PWP2_HUMAN   | Periodic tryptophan protein 2 homolog                                                         | PWP2     |
| Not defined | sp    | Q15274  | NADC_HUMAN   | Nicotinate-nucleotide pyrophosphorylase [carboxylating]                                       | QPRT     |
| Not defined | sp    | Q15276  | RABE1_HUMAN  | Rab GTPase-binding effector protein 1                                                         | RABEP1   |
| Not defined | sp    | Q15291  | RBBP5_HUMAN  | Retinoblastoma-binding protein 5                                                              | RBBP5    |
| Not defined | sp    | Q15303  | ERBB4_HUMAN  | Receptor tyrosine-protein kinase erbB-4                                                       | ERBB4    |
| Not defined | sp    | Q15329  | E2F5_HUMAN   | Transcription factor E2F5                                                                     | E2F5     |
| Not defined | sp    | Q15375  | EPHA7_HUMAN  | Ephrin type-A receptor 7                                                                      | EPHA7    |
| Not defined | sp    | Q15392  | DHC24_HUMAN  | Delta(24)-sterol reductase                                                                    | DHCR24   |
| Not defined | sp    | Q15398  | DLGAP5_HUMAN | Disks large-associated protein 5                                                              | DLGAP5   |
| Not defined | sp    | Q15417  | CNN3_HUMAN   | Calponin-3                                                                                    | CNN3     |
| Not defined | sp    | Q15418  | KS6A1_HUMAN  | Ribosomal protein S6 kinase alpha-1                                                           | RPS6KA1  |
| Not defined | sp    | Q15424  | SAFB1_HUMAN  | Scaffold attachment factor B1                                                                 | SAFB     |
| Not defined | sp    | Q15434  | RBMS2_HUMAN  | RNA-binding motif, single-stranded-interacting protein 2                                      | RBMS2    |
| Not defined | sp    | Q15436  | SEC23A_HUMAN | Protein transport protein Sec23A                                                              | SEC23A   |
| Not defined | sp    | Q15437  | SEC23B_HUMAN | Protein transport protein Sec23B                                                              | SEC23B   |
| Not defined | sp    | Q15477  | SKIV2_HUMAN  | Helicase SKI2W                                                                                | SKIV2L   |
| Not defined | sp    | Q15506  | SP17_HUMAN   | Sperm surface protein Sp17                                                                    | SPA17    |
| Not defined | sp    | Q15517  | CDSN_HUMAN   | Corneodesmosin                                                                                | CDSN     |
| Not defined | sp    | Q15526  | SURF1_HUMAN  | Surfeit locus protein 1                                                                       | SURF1    |
| Not defined | sp    | Q15527  | SURF2_HUMAN  | Surfeit locus protein 2                                                                       | SURF2    |
| Not defined | sp    | Q15528  | MED22_HUMAN  | Mediator of RNA polymerase II transcription subunit 22                                        | MED22    |
| Not defined | sp    | Q15532  | SSXT_HUMAN   | Protein SSXT                                                                                  | SS18     |
| Not defined | sp    | Q15543  | TAF13_HUMAN  | Transcription initiation factor TFIID subunit 13                                              | TAF13    |
| Not defined | sp    | Q15545  | TAF7_HUMAN   | Transcription initiation factor TFIID subunit 7                                               | TAF7     |
| Not defined | sp    | Q15554  | TERF2_HUMAN  | Telomeric repeat-binding factor 2                                                             | TERF2    |

Supplementary Table 2.xlsx

| Cluster     | class | UNIPROT | UNIPROT_ID  | Description                                                                 | GN       |
|-------------|-------|---------|-------------|-----------------------------------------------------------------------------|----------|
| Not defined | sp    | Q15555  | MARE2_HUMAN | Microtubule-associated protein RP/EB family member 2                        | MAPRE2   |
| Not defined | sp    | Q15560  | TCEA2_HUMAN | Transcription elongation factor A protein 2                                 | TCEA2    |
| Not defined | sp    | Q15569  | TESK1_HUMAN | Dual specificity testis-specific protein kinase 1                           | TESK1    |
| Not defined | sp    | Q15583  | TGIF1_HUMAN | Homeobox protein TGIF1                                                      | TGIF1    |
| Not defined | sp    | Q15596  | NCOA2_HUMAN | Nuclear receptor coactivator 2                                              | NCOA2    |
| Not defined | sp    | Q15599  | NHRF2_HUMAN | Na(+)/H(+) exchange regulatory cofactor NHE-RF2                             | SLC9A3R2 |
| Not defined | sp    | Q15643  | TRIPB_HUMAN | Thyroid receptor-interacting protein 11                                     | TRIP11   |
| Not defined | sp    | Q15645  | PCH2_HUMAN  | Pachytene checkpoint protein 2 homolog                                      | TRIP13   |
| Not defined | sp    | Q15646  | OASL_HUMAN  | 2'-5'-oligoadenylate synthase-like protein                                  | OASL     |
| Not defined | sp    | Q15654  | TRIP6_HUMAN | Thyroid receptor-interacting protein 6                                      | TRIP6    |
| Not defined | sp    | Q15700  | DLG2_HUMAN  | Disks large homolog 2                                                       | DLG2     |
| Not defined | sp    | Q15714  | T22D1_HUMAN | TSC22 domain family protein 1                                               | TSC22D1  |
| Not defined | sp    | Q15738  | NSDHL_HUMAN | Sterol-4-alpha-carboxylate 3-dehydrogenase, decarboxylating                 | NSDHL    |
| Not defined | sp    | Q15742  | NAB2_HUMAN  | NGFI-A-binding protein 2                                                    | NAB2     |
| Not defined | sp    | Q15744  | CEBPE_HUMAN | CCAAT/enhancer-binding protein epsilon                                      | CEBPE    |
| Not defined | sp    | Q15746  | MYLK_HUMAN  | Myosin light chain kinase, smooth muscle                                    | MYLK     |
| Not defined | sp    | Q15759  | MK11_HUMAN  | Mitogen-activated protein kinase 11                                         | MAPK11   |
| Not defined | sp    | Q15772  | SPEG_HUMAN  | Striated muscle preferentially expressed protein kinase                     | SPEG     |
| Not defined | sp    | Q15773  | MLF2_HUMAN  | Myeloid leukemia factor 2                                                   | MLF2     |
| Not defined | sp    | Q15811  | ITSN1_HUMAN | Intersectin-1                                                               | ITSN1    |
| Not defined | sp    | Q15813  | TBCE_HUMAN  | Tubulin-specific chaperone E                                                | TBCE     |
| Not defined | sp    | Q15814  | TBCC_HUMAN  | Tubulin-specific chaperone C                                                | TBCC     |
| Not defined | sp    | Q15847  | ADIRF_HUMAN | Adipogenesis regulatory factor                                              | ADIRF    |
| Not defined | sp    | Q15904  | VAS1_HUMAN  | V-type proton ATPase subunit S1                                             | ATP6AP1  |
| Not defined | sp    | Q16134  | ETFD_HUMAN  | Electron transfer flavoprotein-ubiquinone oxidoreductase, mitochondrial     | ETFDH    |
| Not defined | sp    | Q16143  | SYUB_HUMAN  | Beta-synuclein                                                              | SNCB     |
| Not defined | sp    | Q16186  | ADRM1_HUMAN | Proteasomal ubiquitin receptor ADRM1                                        | ADRM1    |
| Not defined | sp    | Q16204  | CCDC6_HUMAN | Coiled-coil domain-containing protein 6                                     | CCDC6    |
| Not defined | sp    | Q16270  | IBP7_HUMAN  | Insulin-like growth factor-binding protein 7                                | IGFBP7   |
| Not defined | sp    | Q16348  | S15A2_HUMAN | Solute carrier family 15 member 2                                           | SLC15A2  |
| Not defined | sp    | Q16352  | AINX_HUMAN  | Alpha-internexin                                                            | INA      |
| Not defined | sp    | Q16394  | EXT1_HUMAN  | Exostosin-1                                                                 | EXT1     |
| Not defined | sp    | Q16401  | PSMD5_HUMAN | 26S proteasome non-ATPase regulatory subunit 5                              | PSMD5    |
| Not defined | sp    | Q16473  | TENXA_HUMAN | Putative tenascin-XA                                                        | TNXA     |
| Not defined | sp    | Q16513  | PKN2_HUMAN  | Serine/threonine-protein kinase N2                                          | PKN2     |
| Not defined | sp    | Q16518  | RPE65_HUMAN | Retinoid isomerohydrolase                                                   | RPE65    |
| Not defined | sp    | Q16527  | CSRP2_HUMAN | Cysteine and glycine-rich protein 2                                         | CSRP2    |
| Not defined | sp    | Q16539  | MK14_HUMAN  | Mitogen-activated protein kinase 14                                         | MAPK14   |
| Not defined | sp    | Q16540  | RM23_HUMAN  | 39S ribosomal protein L23, mitochondrial                                    | MRPL23   |
| Not defined | sp    | Q16555  | DPYL2_HUMAN | Dihydropyrimidinase-related protein 2                                       | DPYSL2   |
| Not defined | sp    | Q16587  | ZNF74_HUMAN | Zinc finger protein 74                                                      | ZNF74    |
| Not defined | sp    | Q16594  | TAF9_HUMAN  | Transcription initiation factor TFIID subunit 9                             | TAF9     |
| Not defined | sp    | Q16611  | BAK_HUMAN   | Bcl-2 homologous antagonist/killer                                          | BAK1     |
| Not defined | sp    | Q16625  | OCLN_HUMAN  | Occludin                                                                    | OCLN     |
| Not defined | sp    | Q16626  | MEA1_HUMAN  | Male-enhanced antigen 1                                                     | MEA1     |
| Not defined | sp    | Q16637  | SMN_HUMAN   | Survival motor neuron protein                                               | SMN2     |
| Not defined | sp    | Q16643  | DREB_HUMAN  | Drebrin                                                                     | DBN1     |
| Not defined | sp    | Q16651  | PRSS8_HUMAN | Prostasin                                                                   | PRSS8    |
| Not defined | sp    | Q16659  | MK06_HUMAN  | Mitogen-activated protein kinase 6                                          | MAPK6    |
| Not defined | sp    | Q16666  | IFI16_HUMAN | Gamma-interferon-inducible protein 16                                       | IFI16    |
| Not defined | sp    | Q16678  | CP1B1_HUMAN | Cytochrome P450 1B1                                                         | CYP1B1   |
| Not defined | sp    | Q16706  | MA2A1_HUMAN | Alpha-mannosidase 2                                                         | MAN2A1   |
| Not defined | sp    | Q16719  | KYNU_HUMAN  | Kynureninase                                                                | KYNU     |
| Not defined | sp    | Q16720  | AT2B3_HUMAN | Plasma membrane calcium-transporting ATPase 3                               | ATP2B3   |
| Not defined | sp    | Q16740  | CLPP_HUMAN  | ATP-dependent Clp protease proteolytic subunit, mitochondrial               | CLPP     |
| Not defined | sp    | Q16760  | DGKD_HUMAN  | Diacylglycerol kinase delta                                                 | DGKD     |
| Not defined | sp    | Q16763  | UBE2S_HUMAN | Ubiquitin-conjugating enzyme E2 S                                           | UBE2S    |
| Not defined | sp    | Q16769  | QPCT_HUMAN  | Glutaminyl-peptide cyclotransferase                                         | QPCT     |
| Not defined | sp    | Q16773  | KAT1_HUMAN  | Kynurenine-oxoglutarate transaminase 1                                      | KYAT1    |
| Not defined | sp    | Q16774  | KGUA_HUMAN  | Guanylate kinase                                                            | GUK1     |
| Not defined | sp    | Q16775  | GLO2_HUMAN  | Hydroxyacylglutathione hydrolase, mitochondrial                             | HAGH     |
| Not defined | sp    | Q16787  | LAMA3_HUMAN | Laminin subunit alpha-3                                                     | LAMA3    |
| Not defined | sp    | Q16790  | CAH9_HUMAN  | Carbonic anhydrase 9                                                        | CA9      |
| Not defined | sp    | Q16795  | NDUA9_HUMAN | NADH dehydrogenase [ubiquinone] 1 alpha subcomplex subunit 9, mitochondrial | NDUFA9   |
| Not defined | sp    | Q16798  | MAON_HUMAN  | NADP-dependent malic enzyme, mitochondrial                                  | ME3      |
| Not defined | sp    | Q16822  | PCKGM_HUMAN | Phosphoenolpyruvate carboxykinase [GTP], mitochondrial                      | PCK2     |
| Not defined | sp    | Q16827  | PTPRO_HUMAN | Receptor-type tyrosine-protein phosphatase O                                | PTPRO    |
| Not defined | sp    | Q16831  | UPP1_HUMAN  | Uridine phosphorylase 1                                                     | UPP1     |
| Not defined | sp    | Q16850  | CP51A_HUMAN | Lanosterol 14-alpha demethylase                                             | CYP51A1  |
| Not defined | sp    | Q16851  | UGPA_HUMAN  | UTP-glucose-1-phosphate uridylyltransferase                                 | UGP2     |
| Not defined | sp    | Q16854  | DGUOK_HUMAN | Deoxyguanosine kinase, mitochondrial                                        | DGUOK    |
| Not defined | sp    | Q16878  | CDO1_HUMAN  | Cysteine dioxygenase type 1                                                 | CDO1     |
| Not defined | sp    | Q16890  | TPD53_HUMAN | Tumor protein D53                                                           | TPD52L1  |
| Not defined | sp    | Q16891  | MIC60_HUMAN | MICOS complex subunit MIC60                                                 | IMMT     |
| Not defined | sp    | Q17RC7  | EX3L4_HUMAN | Exocyst complex component 3-like protein 4                                  | EXOC3L4  |
| Not defined | sp    | Q17RR3  | LIPR3_HUMAN | Pancreatic lipase-related protein 3                                         | PNLIPRP3 |
| Not defined | sp    | Q11529  | LONF2_HUMAN | LON peptidase N-terminal domain and RING finger protein 2                   | LONRF2   |
| Not defined | sp    | Q1MSJ5  | CSPP1_HUMAN | Centrosome and spindle pole-associated protein 1                            | CSPP1    |
| Not defined | sp    | Q1KH10  | SKDA1_HUMAN | SKI/DACH domain-containing protein 1                                        | SKIDA1   |
| Not defined | sp    | Q27J81  | INF2_HUMAN  | Inverted formin-2                                                           | INF2     |
| Not defined | sp    | Q29983  | MICA_HUMAN  | MHC class I polypeptide-related sequence A                                  | MICA     |
| Not defined | sp    | Q29RF7  | PDS5A_HUMAN | Sister chromatid cohesion protein PDS5 homolog A                            | PDS5A    |
| Not defined | sp    | Q2KHT3  | CL16A_HUMAN | Protein CLEC16A                                                             | CLEC16A  |
| Not defined | sp    | Q21D37  | K1109_HUMAN | Transmembrane protein KIAA1109                                              | KIAA1109 |
| Not defined | sp    | Q2M1K9  | ZN423_HUMAN | Zinc finger protein 423                                                     | ZNF423   |
| Not defined | sp    | Q2M296  | MTHSD_HUMAN | Methylenetetrahydrofolate synthase domain-containing protein                | MTHFSD   |
| Not defined | sp    | Q2M2H8  | MGAL_HUMAN  | Probable maltase-glucoamylase 2                                             | MGM2     |
| Not defined | sp    | Q2M3V2  | SWAHA_HUMAN | Ankyrin repeat domain-containing protein SOWAHA                             | SOWAHA   |
| Not defined | sp    | Q2NKX8  | ERC6L_HUMAN | DNA excision repair protein ERCC-6-like                                     | ERCC6L   |
| Not defined | sp    | Q2NL82  | TSR1_HUMAN  | Pre-rRNA-processing protein TSR1 homolog                                    | TSR1     |



Supplementary Table 2.xlsx

| Cluster     | class | UNIPROT | UNIPROT_ID     | Description                                                                 | GN        |
|-------------|-------|---------|----------------|-----------------------------------------------------------------------------|-----------|
| Not defined | sp    | Q2PP17  | RGPA2_HUMAN    | Ral GTPase-activating protein subunit alpha-2                               | RALGAP2   |
| Not defined | sp    | Q2QD12  | RPEL1_HUMAN    | Ribulose-phosphate 3-epimerase-like protein 1                               | RPEL1     |
| Not defined | sp    | Q2TAA2  | IAH1_HUMAN     | Isoamyl acetate-hydrolyzing esterase 1 homolog                              | IAH1      |
| Not defined | sp    | Q2TAC2  | CCD57_HUMAN    | Coiled-coil domain-containing protein 57                                    | CCDC57    |
| Not defined | sp    | Q2TAK8  | PWP3A_HUMAN    | PWWP domain-containing DNA repair factor 3A                                 | PWWP3A    |
| Not defined | sp    | Q2TAL8  | QRIC1_HUMAN    | Glutamine-rich protein 1                                                    | QRIC1     |
| Not defined | sp    | Q2TAV7  | SMU1_HUMAN     | WD40 repeat-containing protein SMU1                                         | SMU1      |
| Not defined | sp    | Q2TV78  | MST1L_HUMAN    | Putative macrophage stimulating 1-like protein                              | MST1L     |
| Not defined | sp    | Q2VIR3  | IF2GL_HUMAN    | Eukaryotic translation initiation factor 2 subunit 3B                       | EIF2S3B   |
| Not defined | sp    | Q2VPB7  | AP5B1_HUMAN    | AP-5 complex subunit beta-1                                                 | AP5B1     |
| Not defined | sp    | Q2VWP7  | PRTG_HUMAN     | Protogenin                                                                  | PRTG      |
| Not defined | sp    | Q2WGI9  | FR1L6_HUMAN    | Fer-1-like protein 6                                                        | FER1L6    |
| Not defined | sp    | Q2Y0W8  | S4A8_HUMAN     | Electroneutral sodium bicarbonate exchanger 1                               | SLC4A8    |
| Not defined | sp    | Q30201  | HFE_HUMAN      | Hereditary hemochromatosis protein                                          | HFE       |
| Not defined | sp    | Q309B1  | TR16L_HUMAN    | Tripartite motif-containing protein 16-like protein                         | TRIM16L   |
| Not defined | sp    | Q32M45  | ANO4_HUMAN     | Anoctamin-4                                                                 | ANO4      |
| Not defined | sp    | Q32M88  | PGGHG_HUMAN    | Protein-glucosylgalactosylhydroxylase glucosidase                           | PGGHG     |
| Not defined | sp    | Q32MK0  | MYLK3_HUMAN    | Myosin light chain kinase 3                                                 | MYLK3     |
| Not defined | sp    | Q32P28  | P3H1_HUMAN     | Prolyl 3-hydroxylase 1                                                      | P3H1      |
| Not defined | sp    | Q32P44  | EMAL3_HUMAN    | Echinoderm microtubule-associated protein-like 3                            | EML3      |
| Not defined | sp    | Q330K2  | NDUF6_HUMAN    | NADH dehydrogenase (ubiquinone) complex 1, assembly factor 6                | NDUF6     |
| Not defined | sp    | Q385D2  | LRRK1_HUMAN    | Leucine-rich repeat serine/threonine-protein kinase 1                       | LRRK1     |
| Not defined | sp    | Q3KP66  | INAVA_HUMAN    | Innate immunity activator protein                                           | INAVA     |
| Not defined | sp    | Q3KQU3  | IMA7D1_HUMAN   | MAP7 domain-containing protein 1                                            | MAP7D1    |
| Not defined | sp    | Q3KQV3  | ZNF792_HUMAN   | Zinc finger protein 792                                                     | ZNF792    |
| Not defined | sp    | Q3KQV9  | UAP1L_HUMAN    | UDP-N-acetylhexosamine pyrophosphorylase-like protein 1                     | UAP1L1    |
| Not defined | sp    | Q3KR16  | PKHG6_HUMAN    | Pleckstrin homology domain-containing family G member 6                     | PLEKHG6   |
| Not defined | sp    | Q3KRA9  | ALKB6_HUMAN    | Alpha-ketoglutarate-dependent dioxygenase alkB homolog 6                    | ALKB6     |
| Not defined | sp    | Q3L8U1  | CHD9_HUMAN     | Chromodomain-helicase-DNA-binding protein 9                                 | CHD9      |
| Not defined | sp    | Q3LIE5  | ADPRM_HUMAN    | Manganese-dependent ADP-ribose/CDP-alcohol diphosphatase                    | ADPRM     |
| Not defined | sp    | Q3LXA3  | TKFC_HUMAN     | Triokinase/FMN cyclase                                                      | TKFC      |
| Not defined | sp    | Q3MIP1  | IPLI2_HUMAN    | Inositol 1,4,5-trisphosphate receptor-interacting protein-like 2            | ITPR1L2   |
| Not defined | sp    | Q3MIR4  | CC50B_HUMAN    | Cell cycle control protein 50B                                              | TMEM30B   |
| Not defined | sp    | Q3MJ13  | WDR72_HUMAN    | WD repeat-containing protein 72                                             | WDR72     |
| Not defined | sp    | Q3MJ16  | PA24E_HUMAN    | Cytosolic phospholipase A2 epsilon                                          | PLA2G4E   |
| Not defined | sp    | Q3SY52  | ZIK1_HUMAN     | Zinc finger protein interacting with ribonucleoprotein K                    | ZIK1      |
| Not defined | sp    | Q3T8J9  | GON4L_HUMAN    | GON-4-like protein                                                          | GON4L     |
| Not defined | sp    | Q3V6T2  | GRDN_HUMAN     | Girdin                                                                      | CCDC88A   |
| Not defined | sp    | Q3YEC7  | RABL6_HUMAN    | Rab-like protein 6                                                          | RABL6     |
| Not defined | sp    | Q3ZC08  | TIM50_HUMAN    | Mitochondrial import inner membrane translocase subunit TIM50               | TIMM50    |
| Not defined | sp    | Q3ZCW2  | LEGL_HUMAN     | Galectin-related protein                                                    | LGALSL    |
| Not defined | sp    | Q495W5  | FUT11_HUMAN    | Alpha-(1,3)-fucosyltransferase 11                                           | FUT11     |
| Not defined | sp    | Q495Y7  | SPDE7_HUMAN    | Putative speedy protein E7                                                  | SPDYE7P   |
| Not defined | sp    | Q49AR2  | CE022_HUMAN    | UPF0489 protein C5orf22                                                     | C5orf22   |
| Not defined | sp    | Q49B96  | COX19_HUMAN    | Cytochrome c oxidase assembly protein COX19                                 | COX19     |
| Not defined | sp    | Q4AC99  | 1A1L2_HUMAN    | Probable inactive 1-aminocyclopropane-1-carboxylate synthase-like protein 2 | ACCSL     |
| Not defined | sp    | Q4G0F5  | VP26B_HUMAN    | Vacuolar protein sorting-associated protein 26B                             | VPS26B    |
| Not defined | sp    | Q4G0G2  | H1FX-AS1_HUMAN | Putative uncharacterized protein H1FX-AS1                                   | H1FX-AS1  |
| Not defined | sp    | Q4G0I0  | C5MST1_HUMAN   | Protein CCSMST1                                                             | CCSMST1   |
| Not defined | sp    | Q4G0J3  | LARP7_HUMAN    | La-related protein 7                                                        | LARP7     |
| Not defined | sp    | Q4G0U5  | PCDP1_HUMAN    | Cilia- and flagella-associated protein 221                                  | CFAP221   |
| Not defined | sp    | Q4G1C9  | GRPL2_HUMAN    | GLIPR1-like protein 2                                                       | GLIPR1L2  |
| Not defined | sp    | Q4KMP7  | TB10B_HUMAN    | TBC1 domain family member 10B                                               | TBC1D10B  |
| Not defined | sp    | Q4KMX7  | F106A_HUMAN    | Protein FAM106A                                                             | FAM106A   |
| Not defined | sp    | Q4KWH8  | PLCH1_HUMAN    | 1-phosphatidylinositol 4,5-bisphosphate phosphodiesterase eta-1             | PLCH1     |
| Not defined | sp    | Q4LE39  | ARI4B_HUMAN    | AT-rich interactive domain-containing protein 4B                            | ARID4B    |
| Not defined | sp    | Q4U2R6  | RMS1_HUMAN     | 39S ribosomal protein L51, mitochondrial                                    | MRPL51    |
| Not defined | sp    | Q4V321  | GAG13_HUMAN    | G antigen 13                                                                | GAGE13    |
| Not defined | sp    | Q4V326  | GAG2E_HUMAN    | G antigen 2E                                                                | GAGE2E    |
| Not defined | sp    | Q4V339  | CBWD6_HUMAN    | COBW domain-containing protein 6                                            | CBWD6     |
| Not defined | sp    | Q4VC05  | BCL7A_HUMAN    | B-cell CLL/lymphoma 7 protein family member A                               | BCL7A     |
| Not defined | sp    | Q4VC44  | FWCH1_HUMAN    | FLYWCH-type zinc finger-containing protein 1                                | FLYWCH1   |
| Not defined | sp    | Q4VCS5  | AMOT_HUMAN     | Angiomotin                                                                  | AMOT      |
| Not defined | sp    | Q4ZG55  | GREB1_HUMAN    | Protein GREB1                                                               | GREB1     |
| Not defined | sp    | Q4ZIN3  | MBRL_HUMAN     | Membralin                                                                   | TMEM259   |
| Not defined | sp    | Q52LJ0  | FA98B_HUMAN    | Protein FAM98B                                                              | FAM98B    |
| Not defined | sp    | Q53EL6  | PDCD4_HUMAN    | Programmed cell death protein 4                                             | PDCD4     |
| Not defined | sp    | Q53F19  | NCBP3_HUMAN    | Nuclear cap-binding protein subunit 3                                       | NCBP3     |
| Not defined | sp    | Q53F39  | MPPPE1_HUMAN   | Metallophosphoesterase 1                                                    | MPPPE1    |
| Not defined | sp    | Q53FA7  | QORX_HUMAN     | Quinone oxidoreductase PIG3                                                 | TP53I3    |
| Not defined | sp    | Q53GA4  | PHLA2_HUMAN    | Pleckstrin homology-like domain family A member 2                           | PHLDA2    |
| Not defined | sp    | Q53GG5  | PDLI3_HUMAN    | PDZ and LIM domain protein 3                                                | PDLIM3    |
| Not defined | sp    | Q53GQ0  | DHB12_HUMAN    | Very-long-chain 3-oxoacyl-CoA reductase                                     | HSD17B12  |
| Not defined | sp    | Q53GS7  | GLE1_HUMAN     | Nucleoporin GLE1                                                            | GLE1      |
| Not defined | sp    | Q53GS9  | SNUT2_HUMAN    | U4/U6.U5 tri-snRNP-associated protein 2                                     | USP39     |
| Not defined | sp    | Q53H12  | AGK_HUMAN      | Acylglycerol kinase, mitochondrial                                          | AGK       |
| Not defined | sp    | Q53H96  | P5CR3_HUMAN    | Pyrrrole-5-carboxylate reductase 3                                          | PYCR3     |
| Not defined | sp    | Q53HC5  | KLH26_HUMAN    | Kelch-like protein 26                                                       | KLHL26    |
| Not defined | sp    | Q53HC9  | EIPR1_HUMAN    | EARP and GARP complex-interacting protein 1                                 | EIPR1     |
| Not defined | sp    | Q53S08  | RAB6D_HUMAN    | Ras-related protein Rab-6D                                                  | RAB6D     |
| Not defined | sp    | Q53S33  | BOLA3_HUMAN    | Bola-like protein 3                                                         | BOLA3     |
| Not defined | sp    | Q53SF7  | COBL1_HUMAN    | Cordon-bleu protein-like 1                                                  | COBL1     |
| Not defined | sp    | Q56VL3  | OCAD2_HUMAN    | OCIA domain-containing protein 2                                            | OCIA2     |
| Not defined | sp    | Q58719  | SFT2C_HUMAN    | Vesicle transport protein SFT2C                                             | SFT2D3    |
| Not defined | sp    | Q58EX7  | PKHG4_HUMAN    | Puratrophin-1                                                               | PLEKHG4   |
| Not defined | sp    | Q58F21  | BRDT_HUMAN     | Bromodomain testis-specific protein                                         | BRDT      |
| Not defined | sp    | Q58FF3  | ENPLL_HUMAN    | Putative endoplasmic-like protein                                           | HSP90B2P  |
| Not defined | sp    | Q58FG0  | HS905_HUMAN    | Putative heat shock protein HSP 90-alpha A5                                 | HSP90AA5P |
| Not defined | sp    | Q58HT5  | AWAT1_HUMAN    | Acyl-CoA wax alcohol acyltransferase 1                                      | AWAT1     |
| Not defined | sp    | Q59GN2  | R39L5_HUMAN    | Putative 60S ribosomal protein L39-like 5                                   | RPL39P5   |

Supplementary Table 2.xlsx

| Cluster     | class | UNIPROT | UNIPROT_ID  | Description                                                     | GN        |
|-------------|-------|---------|-------------|-----------------------------------------------------------------|-----------|
| Not defined | sp    | Q5BKU9  | OXLD1_HUMAN | Oxidoreductase-like domain-containing protein 1                 | OXLD1     |
| Not defined | sp    | Q5BKV9  | F133B_HUMAN | Protein FAM133B                                                 | FAM133B   |
| Not defined | sp    | Q5BKZ1  | ZN326_HUMAN | DBIRD complex subunit ZNF326                                    | ZNF326    |
| Not defined | sp    | Q5CZC0  | FSIP2_HUMAN | Fibrous sheath-interacting protein 2                            | FSIP2     |
| Not defined | sp    | Q5D862  | FILA2_HUMAN | Filaggrin-2                                                     | FLG2      |
| Not defined | sp    | Q5DID0  | UROL1_HUMAN | Uromodulin-like 1                                               | UMODL1    |
| Not defined | sp    | Q5EBL4  | RIPL1_HUMAN | RILP-like protein 1                                             | RILP1     |
| Not defined | sp    | Q5EBL8  | PDZ11_HUMAN | PDZ domain-containing protein 11                                | PDZD11    |
| Not defined | sp    | Q5EG05  | CAR16_HUMAN | Caspase recruitment domain-containing protein 16                | CARD16    |
| Not defined | sp    | Q5F1R6  | DJC21_HUMAN | DnaJ homolog subfamily C member 21                              | DNAJC21   |
| Not defined | sp    | Q5FWF5  | ESCO1_HUMAN | N-acetyltransferase ESCO1                                       | ESCO1     |
| Not defined | sp    | Q5GH76  | XKR4_HUMAN  | XK-related protein 4                                            | XKR4      |
| Not defined | sp    | Q5H8C1  | FREM1_HUMAN | FRAS1-related extracellular matrix protein 1                    | FREM1     |
| Not defined | sp    | Q5H943  | KKLC1_HUMAN | Kita-kyushu lung cancer antigen 1                               | CT83      |
| Not defined | sp    | Q5H9B9  | BM2KL_HUMAN | Putative BMP-2-inducible kinase-like protein                    | BM2KL     |
| Not defined | sp    | Q5H9L2  | TCAL5_HUMAN | Transcription elongation factor A protein-like 5                | TCEAL5    |
| Not defined | sp    | Q5HY98  | ZN766_HUMAN | Zinc finger protein 766                                         | ZNF766    |
| Not defined | sp    | Q5HYJ1  | TECRL_HUMAN | Trans-2,3-enoyl-CoA reductase-like                              | TECRL     |
| Not defined | sp    | Q5HYK3  | COQ5_HUMAN  | 2-methoxy-6-polyprenyl-1,4-benzoquinol methylase, mitochondrial | COQ5      |
| Not defined | sp    | Q5HYK9  | ZN667_HUMAN | Zinc finger protein 667                                         | ZN667     |
| Not defined | sp    | Q5JNZ5  | RS26L_HUMAN | Putative 40S ribosomal protein S26-like 1                       | RPS26P11  |
| Not defined | sp    | Q5JRA6  | TGO1_HUMAN  | Transport and Golgi organization protein 1 homolog              | MA3       |
| Not defined | sp    | Q5JRX3  | PREP_HUMAN  | Presequence protease, mitochondrial                             | PITRM1    |
| Not defined | sp    | Q5JSS4  | PSMG4_HUMAN | Proteasome assembly chaperone 4                                 | PSMG4     |
| Not defined | sp    | Q5JSH3  | WDR44_HUMAN | WD repeat-containing protein 44                                 | WDR44     |
| Not defined | sp    | Q5JSL3  | DOC11_HUMAN | Dedicator of cytokinesis protein 11                             | DOCK11    |
| Not defined | sp    | Q5J1J3  | COA6_HUMAN  | Cytochrome c oxidase assembly factor 6 homolog                  | COA6      |
| Not defined | sp    | Q5JTW2  | CEP78_HUMAN | Centrosomal protein of 78 kDa                                   | CEP78     |
| Not defined | sp    | Q5JTY5  | CBWD3_HUMAN | COBW domain-containing protein 3                                | CBWD3     |
| Not defined | sp    | Q5J TZ9 | SYAM_HUMAN  | Alanine-tRNA ligase, mitochondrial                              | AARS2     |
| Not defined | sp    | Q5JUR7  | TEX30_HUMAN | Testis-expressed protein 30                                     | TEX30     |
| Not defined | sp    | Q5JUX0  | SPIN3_HUMAN | Spindlin-3                                                      | SPIN3     |
| Not defined | sp    | Q5JVF3  | FRPD3_HUMAN | FERM and PDZ domain-containing protein 3                        | FRMPD3    |
| Not defined | sp    | Q5JVF3  | PCID2_HUMAN | PCI domain-containing protein 2                                 | PCID2     |
| Not defined | sp    | Q5JVG2  | ZN484_HUMAN | Zinc finger protein 484                                         | ZNF484    |
| Not defined | sp    | Q5JV50  | HABP4_HUMAN | Intracellular hyaluronan-binding protein 4                      | HABP4     |
| Not defined | sp    | Q5JWR5  | DOP1_HUMAN  | Protein dopey-1                                                 | DOP1A     |
| Not defined | sp    | Q5M9Q1  | NKAPL_HUMAN | NKAP-like protein                                               | NKAPL     |
| Not defined | sp    | Q5MWC4  | ZN569_HUMAN | Zinc finger protein 569                                         | ZNF569    |
| Not defined | sp    | Q5MI27  | P4R3B_HUMAN | Serine/threonine-protein phosphatase 4 regulatory subunit 3B    | PPP4R3B   |
| Not defined | sp    | Q5MNMZ6 | WIPI3_HUMAN | WD repeat domain phosphoinositide-interacting protein 3         | WDR45B    |
| Not defined | sp    | Q5NDL2  | EOGT_HUMAN  | EGF domain-specific O-linked N-acetylglucosamine transferase    | EOGT      |
| Not defined | sp    | Q5NEF16 | CATL3_HUMAN | Putative inactive cathepsin L-like protein CTSL3P               | CTSL3P    |
| Not defined | sp    | Q5QP82  | DCA10_HUMAN | DDB1- and CUL4-associated factor 10                             | DCAF10    |
| Not defined | sp    | Q5R314  | TTC38_HUMAN | Tetratricopeptide repeat protein 38                             | TTC38     |
| Not defined | sp    | Q5RI15  | COX20_HUMAN | Cytochrome c oxidase assembly protein COX20, mitochondrial      | COX20     |
| Not defined | sp    | Q5RIA9  | CBWD5_HUMAN | COBW domain-containing protein 5                                | CBWD5     |
| Not defined | sp    | Q5SNV9  | CA167_HUMAN | Uncharacterized protein C1orf167                                | C1orf167  |
| Not defined | sp    | Q5SQS8  | CJ120_HUMAN | Uncharacterized protein C10orf120                               | C10orf120 |
| Not defined | sp    | Q5SRD0  | WAC2D_HUMAN | WASH complex subunit 2D                                         | WASHC2D   |
| Not defined | sp    | Q5SRE5  | NU188_HUMAN | Nucleoporin NUP188 homolog                                      | NUP188    |
| Not defined | sp    | Q5SRI9  | MANEA_HUMAN | Glycoprotein endo-alpha-1,2-mannosidase                         | MANEA     |
| Not defined | sp    | Q5SSJ5  | HP1B3_HUMAN | Heterochromatin protein 1-binding protein 3                     | HP1BP3    |
| Not defined | sp    | Q5SW79  | CE170_HUMAN | Centrosomal protein of 170 kDa                                  | CEP170    |
| Not defined | sp    | Q5SWA1  | PR15B_HUMAN | Protein phosphatase 1 regulatory subunit 15B                    | PPP1R15B  |
| Not defined | sp    | Q5SWL7  | PRA14_HUMAN | PRAME family member 14                                          | PRAMEF14  |
| Not defined | sp    | Q5SXM8  | DNLZ_HUMAN  | DNL-type zinc finger protein                                    | DNLZ      |
| Not defined | sp    | Q5SY16  | NOL9_HUMAN  | Polynucleotide 5'-hydroxyl-kinase NOL9                          | NOL9      |
| Not defined | sp    | Q5SYE7  | NHSL1_HUMAN | NHS-like protein 1                                              | NHSL1     |
| Not defined | sp    | Q5SZB4  | CI050_HUMAN | Uncharacterized protein C9orf50                                 | C9orf50   |
| Not defined | sp    | Q5T013  | HYL_HUMAN   | Putative hydroxyppyruvate isomerase                             | HYL       |
| Not defined | sp    | Q5T0D9  | TPRGL_HUMAN | Tumor protein p63-regulated gene 1-like protein                 | TPRGL1    |
| Not defined | sp    | Q5T0F9  | C2D1B_HUMAN | Coiled-coil and C2 domain-containing protein 1B                 | CC2D1B    |
| Not defined | sp    | Q5T0N5  | FBP1L_HUMAN | Formin-binding protein 1-like                                   | FNBP1L    |
| Not defined | sp    | Q5T197  | DCST1_HUMAN | E3 ubiquitin-protein ligase DCST1                               | DCST1     |
| Not defined | sp    | Q5T1M5  | FKB15_HUMAN | FK506-binding protein 15                                        | FKBP15    |
| Not defined | sp    | Q5T1R4  | ZEP3_HUMAN  | Transcription factor HIVEP3                                     | HIVEP3    |
| Not defined | sp    | Q5T200  | ZC3HD_HUMAN | Zinc finger CCCH domain-containing protein 13                   | ZC3H13    |
| Not defined | sp    | Q5T280  | CI114_HUMAN | Putative methyltransferase C9orf114                             | SPOUT1    |
| Not defined | sp    | Q5T2T1  | MPP7_HUMAN  | MAGUK p55 subfamily member 7                                    | MPP7      |
| Not defined | sp    | Q5T310  | GPTC4_HUMAN | G patch domain-containing protein 4                             | GPATCH4   |
| Not defined | sp    | Q5T3J3  | LRIF1_HUMAN | Ligand-dependent nuclear receptor-interacting factor 1          | LRIF1     |
| Not defined | sp    | Q5T3U5  | MRP7_HUMAN  | Multidrug resistance-associated protein 7                       | ABCC10    |
| Not defined | sp    | Q5T4S7  | UBR4_HUMAN  | E3 ubiquitin-protein ligase UBR4                                | UBR4      |
| Not defined | sp    | Q5T5P2  | SKT_HUMAN   | Sickle tail protein homolog                                     | KIAA1217  |
| Not defined | sp    | Q5T5U3  | RHG21_HUMAN | Rho GTPase-activating protein 21                                | ARHGAP21  |
| Not defined | sp    | Q5T601  | AGRF1_HUMAN | Adhesion G-protein coupled receptor F1                          | ADGRF1    |
| Not defined | sp    | Q5T655  | CFA58_HUMAN | Cilia- and flagella-associated protein 58                       | CFAP58    |
| Not defined | sp    | Q5T6F2  | UBAP2_HUMAN | Ubiquitin-associated protein 2                                  | UBAP2     |
| Not defined | sp    | Q5T6V5  | QSP_P_HUMAN | Queuosine salvage protein                                       | C9orf64   |
| Not defined | sp    | Q5T6X5  | GPC6A_HUMAN | G-protein coupled receptor family C group 6 member A            | GPC6A     |
| Not defined | sp    | Q5T7B8  | KIF24_HUMAN | Kinesin-like protein KIF24                                      | KIF24     |
| Not defined | sp    | Q5T7M9  | DIK1A_HUMAN | Divergent protein kinase domain 1A                              | DIPK1A    |
| Not defined | sp    | Q5T890  | ERL2_HUMAN  | DNA excision repair protein ERCC-6-like 2                       | ERCC6L2   |
| Not defined | sp    | Q5T8D3  | ACBD5_HUMAN | Acyl-CoA-binding domain-containing protein 5                    | ACBD5     |
| Not defined | sp    | Q5T8P6  | RBM26_HUMAN | RNA-binding protein 26                                          | RBM26     |
| Not defined | sp    | Q5T9A4  | ATD3B_HUMAN | ATPase family AAA domain-containing protein 3B                  | ATAD3B    |
| Not defined | sp    | Q5TA81  | LCE2C_HUMAN | Late cornified envelope protein 2C                              | LCE2C     |
| Not defined | sp    | Q5TA82  | LCE2D_HUMAN | Late cornified envelope protein 2D                              | LCE2D     |
| Not defined | sp    | Q5TAA0  | TTC22_HUMAN | Tetratricopeptide repeat protein 22                             | TTC22     |

Supplementary Table 2.xlsx

| Cluster     | class | UNIPROT | UNIPROT_ID   | Description                                                                      | GN       |
|-------------|-------|---------|--------------|----------------------------------------------------------------------------------|----------|
| Not defined | sp    | Q5TAQ9  | DCAF8_HUMAN  | DDB1- and CUL4-associated factor 8                                               | DCAF8    |
| Not defined | sp    | Q5TBA9  | FRY_HUMAN    | Protein furry homolog                                                            | FRY      |
| Not defined | sp    | Q5TBB1  | RNH2B_HUMAN  | Ribonuclease H2 subunit B                                                        | RNASEH2B |
| Not defined | sp    | Q5TBK1  | N42L1_HUMAN  | NEDD4-binding protein 2-like 1                                                   | N4BP2L1  |
| Not defined | sp    | Q5TC12  | ATPF1_HUMAN  | ATP synthase mitochondrial F1 complex assembly factor 1                          | ATPAF1   |
| Not defined | sp    | Q5TCM9  | LCE5A_HUMAN  | Late cornified envelope protein 5A                                               | LCE5A    |
| Not defined | sp    | Q5TCO9  | MAGI3_HUMAN  | Membrane-associated guanylate kinase, WW and PDZ domain-containing protein 3     | MAGI3    |
| Not defined | sp    | Q5TCS8  | KAD9_HUMAN   | Adenylate kinase 9                                                               | AK9      |
| Not defined | sp    | Q5TCX8  | M3K21_HUMAN  | Mitogen-activated protein kinase kinase kinase 21                                | MAP3K21  |
| Not defined | sp    | Q5TDH0  | DDI2_HUMAN   | Protein DDI1 homolog 2                                                           | DDI2     |
| Not defined | sp    | Q5TDP6  | LGSN_HUMAN   | Lengsin                                                                          | LGSN     |
| Not defined | sp    | Q5TEZ5  | CF163_HUMAN  | Uncharacterized protein C6orf163                                                 | C6orf163 |
| Not defined | sp    | Q5TFE4  | NT5D1_HUMAN  | 5'-nucleotidase domain-containing protein 1                                      | NT5DC1   |
| Not defined | sp    | Q5TGY3  | AHDC1_HUMAN  | AT-hook DNA-binding motif-containing protein 1                                   | AHDC1    |
| Not defined | sp    | Q5TH69  | BIG3_HUMAN   | Brefeldin A-inhibited guanine nucleotide-exchange protein 3                      | ARFGEF3  |
| Not defined | sp    | Q5THK1  | PR14L_HUMAN  | Protein PRR14L                                                                   | PRR14L   |
| Not defined | sp    | Q5U5U0  | LYRM7_HUMAN  | Complex III assembly factor LYRM7                                                | LYRM7    |
| Not defined | sp    | Q5UCC4  | EMC10_HUMAN  | ER membrane protein complex subunit 10                                           | EMC10    |
| Not defined | sp    | Q5VSG8  | MANEL_HUMAN  | Glycoprotein endo-alpha-1,2-mannosidase-like protein                             | MANEAL   |
| Not defined | sp    | Q5V779  | AXA81_HUMAN  | Annexin A8-like protein 1                                                        | ANXA8L1  |
| Not defined | sp    | Q5VTD9  | GFI1B_HUMAN  | Zinc finger protein Gfi-1b                                                       | GFI1B    |
| Not defined | sp    | Q5VTE6  | ANGE2_HUMAN  | Protein angel homolog 2                                                          | ANGEL2   |
| Not defined | sp    | Q5VTL8  | PR38B_HUMAN  | Pre-mRNA-splicing factor 38B                                                     | PRPF38B  |
| Not defined | sp    | Q5VTR2  | BRE1A_HUMAN  | E3 ubiquitin-protein ligase BRE1A                                                | RNF20    |
| Not defined | sp    | Q5VTT2  | C1135_HUMAN  | Protein C9orf135                                                                 | C9orf135 |
| Not defined | sp    | Q5VU43  | MYOME_HUMAN  | Myomegalin                                                                       | PDE4DIP  |
| Not defined | sp    | Q5VU44  | ZN318_HUMAN  | Zinc finger protein 318                                                          | ZNF318   |
| Not defined | sp    | Q5VUM1  | SDHF4_HUMAN  | Succinate dehydrogenase assembly factor 4, mitochondrial                         | SDHAF4   |
| Not defined | sp    | Q5VV42  | CDKAL_HUMAN  | Threonylcarbamoyladenosine tRNA methyltransferase                                | CDKAL1   |
| Not defined | sp    | Q5VV67  | PPRC1_HUMAN  | Peroxisome proliferator-activated receptor gamma coactivator-related protein 1   | PPRC1    |
| Not defined | tr    | Q5VVH2  | Q5VVH2_HUMAN | Peptidylprolyl isomerase                                                         | FKBP1C   |
| Not defined | sp    | Q5VVM6  | CCD30_HUMAN  | Coiled-coil domain-containing protein 30                                         | CCDC30   |
| Not defined | sp    | Q5VW32  | BROX_HUMAN   | BRO1 domain-containing protein BROX                                              | BROX     |
| Not defined | sp    | Q5VWN6  | TASO2_HUMAN  | Protein TASOR 2                                                                  | TASOR2   |
| Not defined | sp    | Q5VWQ8  | DAB2P_HUMAN  | Disabled homolog 2-interacting protein                                           | DAB2IP   |
| Not defined | sp    | Q5VWX1  | KHDR2_HUMAN  | KH domain-containing, RNA-binding, signal transduction-associated protein 2      | KHDRBS2  |
| Not defined | sp    | Q5VWZ2  | LYPL1_HUMAN  | Lyso-phospholipase-like protein 1                                                | LYPLAL1  |
| Not defined | sp    | Q5VY15  | MALR1_HUMAN  | MAM and LDL-receptor class A domain-containing protein 1                         | MALRD1   |
| Not defined | sp    | Q5VYK3  | ECM29_HUMAN  | Proteasome adapter and scaffold protein ECM29                                    | ECPAS    |
| Not defined | sp    | Q5VYM1  | C1131_HUMAN  | Uncharacterized protein C9orf131                                                 | C9orf131 |
| Not defined | sp    | Q5VY58  | TUT7_HUMAN   | Terminal uridylyltransferase 7                                                   | TUT7     |
| Not defined | sp    | Q5VZ03  | NXNL2_HUMAN  | Nucleoredoxin-like protein 2                                                     | NXNL2    |
| Not defined | sp    | Q5VZ46  | K1614_HUMAN  | Uncharacterized protein KIAA1614                                                 | KIAA1614 |
| Not defined | sp    | Q5VZF2  | MBNL2_HUMAN  | Muscleblind-like protein 2                                                       | MBNL2    |
| Not defined | sp    | Q5VZL5  | ZMYM4_HUMAN  | Zinc finger MYM-type protein 4                                                   | ZMYM4    |
| Not defined | sp    | Q5VZM2  | RRAGB_HUMAN  | Ras-related GTP-binding protein B                                                | RRAGB    |
| Not defined | sp    | Q5W0A0  | ER16B_HUMAN  | Glutamate-rich protein 6B                                                        | ERIC6B   |
| Not defined | sp    | Q5W0Z9  | ZDH20_HUMAN  | Palmitoyltransferase ZDHHC20                                                     | ZDHHC20  |
| Not defined | sp    | Q5W111  | SPRY7_HUMAN  | SPRY domain-containing protein 7                                                 | SPRYD7   |
| Not defined | sp    | Q5XG92  | EST4A_HUMAN  | Carboxylesterase 4A                                                              | CES4A    |
| Not defined | sp    | Q5XKP0  | MIC13_HUMAN  | MICOS complex subunit MIC13                                                      | MICOS13  |
| Not defined | sp    | Q5XX13  | FBW10_HUMAN  | F-box/WD repeat-containing protein 10                                            | FBXW10   |
| Not defined | sp    | Q5XXA6  | ANO1_HUMAN   | Anoctamin-1                                                                      | ANO1     |
| Not defined | sp    | Q5ZPR3  | CD276_HUMAN  | CD276 antigen                                                                    | CD276    |
| Not defined | sp    | Q629K1  | TRIQK_HUMAN  | Triple QxxK/R motif-containing protein                                           | TRIQK    |
| Not defined | sp    | Q63HN8  | RN213_HUMAN  | E3 ubiquitin-protein ligase RNF213                                               | RNF213   |
| Not defined | sp    | Q63HQ2  | EGFLA_HUMAN  | Pikachurin                                                                       | EGFLAM   |
| Not defined | sp    | Q63ZY3  | KANK2_HUMAN  | KN motif and ankyrin repeat domain-containing protein 2                          | KANK2    |
| Not defined | sp    | Q641Q2  | WAC2A_HUMAN  | WASH complex subunit 2A                                                          | WASHC2A  |
| Not defined | sp    | Q658Y4  | F91A1_HUMAN  | Protein FAM91A1                                                                  | FAM91A1  |
| Not defined | sp    | Q659C4  | LAR1B_HUMAN  | La-related protein 1B                                                            | LARP1B   |
| Not defined | sp    | Q66K64  | DCA15_HUMAN  | DDB1- and CUL4-associated factor 15                                              | DCAF15   |
| Not defined | sp    | Q66K66  | TM198_HUMAN  | Transmembrane protein 198                                                        | TMEM198  |
| Not defined | sp    | Q66LE6  | 2ABD_HUMAN   | Serine/threonine-protein phosphatase 2A55 kDa regulatory subunit B delta isoform | PPP2R2D  |
| Not defined | sp    | Q66BL8  | OLM2B_HUMAN  | Olfactomedin-like protein 2B                                                     | OLFML2B  |
| Not defined | sp    | Q68CK6  | ACS2B_HUMAN  | Acyl-coenzyme A synthetase ACSM2B, mitochondrial                                 | ACSM2B   |
| Not defined | sp    | Q68CR7  | LRC66_HUMAN  | Leucine-rich repeat-containing protein 66                                        | LRC66    |
| Not defined | sp    | Q68CZ1  | FTM_HUMAN    | Protein fantom                                                                   | RPGRIP1L |
| Not defined | sp    | Q68CZ6  | HAUS3_HUMAN  | HAUS augmin-like complex subunit 3                                               | HAUS3    |
| Not defined | sp    | Q68D51  | DEN2C_HUMAN  | DENN domain-containing protein 2C                                                | DENND2C  |
| Not defined | sp    | Q68D91  | MBL2C_HUMAN  | Metallo-beta-lactamase domain-containing protein 2                               | MBLAC2   |
| Not defined | sp    | Q68D11  | ZN776_HUMAN  | Zinc finger protein 776                                                          | ZNF776   |
| Not defined | sp    | Q68E01  | INT3_HUMAN   | Integrator complex subunit 3                                                     | INTS3    |
| Not defined | sp    | Q68EM7  | RHG17_HUMAN  | Rho GTPase-activating protein 17                                                 | ARHGAP17 |
| Not defined | sp    | Q69YL0  | NCA52_HUMAN  | Protein NCBP2AS2                                                                 | NCBP2AS2 |
| Not defined | sp    | Q69YN2  | C19L1_HUMAN  | CWF19-like protein 1                                                             | CWF19L1  |
| Not defined | sp    | Q69YQ0  | CYTA_HUMAN   | Cytospin-A                                                                       | SPECC1L  |
| Not defined | sp    | Q69YU5  | CLO73_HUMAN  | Uncharacterized protein C12orf73                                                 | C12orf73 |
| Not defined | sp    | Q6A14   | SL9A4_HUMAN  | Sodium/hydrogen exchanger 4                                                      | SLC9A4   |
| Not defined | sp    | Q6AWC2  | WWC2_HUMAN   | Protein WWC2                                                                     | WWC2     |
| Not defined | sp    | Q6BCY4  | NB5R2_HUMAN  | NADH-cytochrome b5 reductase 2                                                   | CY5R2    |
| Not defined | sp    | Q6DD88  | ATL3_HUMAN   | Atlastin-3                                                                       | ATL3     |
| Not defined | sp    | Q6DHV7  | ADAL_HUMAN   | Adenosine deaminase-like protein                                                 | ADAL     |
| Not defined | sp    | Q6DK11  | RL7L_HUMAN   | 60S ribosomal protein L7-like 1                                                  | RPL7L1   |
| Not defined | sp    | Q6DKK2  | TTC19_HUMAN  | Tetratricopeptide repeat protein 19, mitochondrial                               | TTC19    |
| Not defined | sp    | Q6DN90  | IQEC1_HUMAN  | IQ motif and SEC7 domain-containing protein 1                                    | IQSEC1   |
| Not defined | sp    | Q6F5E8  | CARL2_HUMAN  | Capping protein, Arp2/3 and myosin-I linker protein 2                            | CARMIL2  |
| Not defined | sp    | Q6FI81  | CPIN1_HUMAN  | Anamorsin                                                                        | CIAPIN1  |
| Not defined | sp    | Q6FIF0  | ZFAN6_HUMAN  | AN1-type zinc finger protein 6                                                   | ZFAND6   |
| Not defined | sp    | Q6GMR7  | FAAH2_HUMAN  | Fatty-acid amide hydrolase 2                                                     | FAAH2    |

Supplementary Table 2.xlsx

| Cluster     | class | UNIPROT | UNIPROT_ID   | Description                                                                                   | GN       |
|-------------|-------|---------|--------------|-----------------------------------------------------------------------------------------------|----------|
| Not defined | sp    | Q6GMV2  | SMYD5_HUMAN  | SET and MYND domain-containing protein 5                                                      | SMYD5    |
| Not defined | sp    | Q6GMV3  | PTRD1_HUMAN  | Putative peptidyl-tRNA hydrolase PTRHD1                                                       | PTRHD1   |
| Not defined | sp    | Q6I9Y2  | THOC7_HUMAN  | THO complex subunit 7 homolog                                                                 | THOC7    |
| Not defined | sp    | Q6IA69  | NADE_HUMAN   | Glutamine-dependent NAD(+) synthetase                                                         | NADSYN1  |
| Not defined | sp    | Q6IA86  | ELP2_HUMAN   | Elongator complex protein 2                                                                   | ELP2     |
| Not defined | sp    | Q6IB50  | TWF2_HUMAN   | Twinfilin-2                                                                                   | TWF2     |
| Not defined | sp    | Q6ICB0  | DES1_HUMAN   | Desumoylating isopeptidase 1                                                                  | DES1     |
| Not defined | sp    | Q6IEU7  | OR5MA_HUMAN  | Olfactory receptor 5M10                                                                       | OR5M10   |
| Not defined | sp    | Q6IN84  | MRM1_HUMAN   | rRNA methyltransferase 1, mitochondrial                                                       | MRM1     |
| Not defined | sp    | Q6IN85  | P4R3A_HUMAN  | Serine/threonine-protein phosphatase 4 regulatory subunit 3A                                  | PPP4R3A  |
| Not defined | sp    | Q6IPR1  | ETFR1_HUMAN  | Electron transfer flavoprotein regulatory factor 1                                            | ETFR1    |
| Not defined | sp    | Q6IPX3  | TCAL6_HUMAN  | Transcription elongation factor A protein-like 6                                              | TCEAL6   |
| Not defined | sp    | Q6IQ16  | SPOPL_HUMAN  | Speckle-type POZ protein-like                                                                 | SPOPL    |
| Not defined | sp    | Q6IQ49  | SDE2_HUMAN   | Replication stress response regulator SDE2                                                    | SDE2     |
| Not defined | sp    | Q6ISB3  | GRHL2_HUMAN  | Grainyhead-like protein 2 homolog                                                             | GRHL2    |
| Not defined | sp    | Q6JEL2  | KLH10_HUMAN  | Kelch-like protein 10                                                                         | KLHL10   |
| Not defined | sp    | Q6K0P9  | IFIX_HUMAN   | Pyrin and HIN domain-containing protein 1                                                     | PYHIN1   |
| Not defined | sp    | Q6L8Q7  | PDE12_HUMAN  | 2',5'-phosphodiesterase 12                                                                    | PDE12    |
| Not defined | sp    | Q6MZZ7  | CAN13_HUMAN  | Calpain-13                                                                                    | CAPN13   |
| Not defined | sp    | Q6N022  | TEN4_HUMAN   | Teneurin-4                                                                                    | TENM4    |
| Not defined | sp    | Q6N063  | OGFD2_HUMAN  | 2-oxoglutarate and iron-dependent oxygenase domain-containing protein 2                       | OGFD2    |
| Not defined | sp    | Q6NSJ0  | MYORG_HUMAN  | Myogenesis-regulating glycosidase                                                             | MYORG    |
| Not defined | sp    | Q6NT46  | GAG2A_HUMAN  | G antigen 2A                                                                                  | GAGE2A   |
| Not defined | sp    | Q6NUK1  | SCMC1_HUMAN  | Calcium-binding mitochondrial carrier protein SCAAC-1                                         | SLC25A24 |
| Not defined | sp    | Q6NUM6  | TYW1B_HUMAN  | S-adenosyl-L-methionine-dependent tRNA 4-demethylwyosine synthase TYW1B                       | TYW1B    |
| Not defined | sp    | Q6NUM9  | RETSAT_HUMAN | All-trans-retinol 13,14-reductase                                                             | RETSAT   |
| Not defined | sp    | Q6NVY1  | HIBCH_HUMAN  | 3-hydroxyisobutyryl-CoA hydrolase, mitochondrial                                              | HIBCH    |
| Not defined | sp    | Q6NWX29 | RWDD4_HUMAN  | RWD domain-containing protein 4                                                               | RWDD4    |
| Not defined | sp    | Q6NXG1  | ESRP1_HUMAN  | Epithelial splicing regulatory protein 1                                                      | ESRP1    |
| Not defined | sp    | Q6NYC1  | JMJD6_HUMAN  | Bifunctional arginine demethylase and lysyl-hydroxylase JMJD6                                 | JMJD6    |
| Not defined | sp    | Q6NYC8  | PPR18_HUMAN  | Phostensin                                                                                    | PPP1R18  |
| Not defined | sp    | Q6NZ63  | STEAL_HUMAN  | STEAP family member 1B                                                                        | STEAP1B  |
| Not defined | sp    | Q6NZ67  | MZT2B_HUMAN  | Mitotic-spindle organizing protein 2B                                                         | MZT2B    |
| Not defined | sp    | Q6NZY4  | ZCHC8_HUMAN  | Zinc finger CCHC domain-containing protein 8                                                  | ZCCHC8   |
| Not defined | sp    | Q6NZY7  | BORG3_HUMAN  | Cdc42 effector protein 5                                                                      | CDC42EP5 |
| Not defined | sp    | Q6P161  | RM54_HUMAN   | 39S ribosomal protein L54, mitochondrial                                                      | MRPL54   |
| Not defined | sp    | Q6P179  | ERAP2_HUMAN  | Endoplasmic reticulum aminopeptidase 2                                                        | ERAP2    |
| Not defined | sp    | Q6P199  | CDC73_HUMAN  | Parafibromin                                                                                  | CDC73    |
| Not defined | sp    | Q6P1M3  | RM14_HUMAN   | 39S ribosomal protein L14, mitochondrial                                                      | MRPL14   |
| Not defined | sp    | Q6P1M3  | L2GL2_HUMAN  | LLGL scribble cell polarity complex component 2                                               | LLGL2    |
| Not defined | sp    | Q6P1N0  | C2D1A_HUMAN  | Coiled-coil and C2 domain-containing protein 1A                                               | CC2D1A   |
| Not defined | sp    | Q6P1Q0  | LETMD1_HUMAN | LETM1 domain-containing protein 1                                                             | LETMD1   |
| Not defined | sp    | Q6P1O9  | MET2B_HUMAN  | tRNA N(3)-methylcytidine methyltransferase METTL2B                                            | METTL2B  |
| Not defined | sp    | Q6P1R4  | DUS1L_HUMAN  | tRNA-dihydrouridine(16/17) synthase [NAD(P)(+)]-like                                          | DUS1L    |
| Not defined | sp    | Q6P1X6  | CH082_HUMAN  | UPF0598 protein C8orf82                                                                       | C8orf82  |
| Not defined | sp    | Q6P2E9  | EDC4_HUMAN   | Enhancer of mRNA-decapping protein 4                                                          | EDC4     |
| Not defined | sp    | Q6P2I3  | FAHD2B_HUMAN | Fumarylacetoacetate hydrolase domain-containing protein 2B                                    | FAHD2B   |
| Not defined | sp    | Q6P2P2  | ANM9_HUMAN   | Protein arginine N-methyltransferase 9                                                        | PRMT9    |
| Not defined | sp    | Q6P2O9  | PRP8_HUMAN   | Pre-mRNA-processing-splicing factor 8                                                         | PRP8     |
| Not defined | sp    | Q6P2S7  | TTC41_HUMAN  | Putative tetratricopeptide repeat protein 41                                                  | TTC41P   |
| Not defined | sp    | Q6P3X8  | PGBD2_HUMAN  | PiggyBac transposable element-derived protein 2                                               | PGBD2    |
| Not defined | sp    | Q6P4A8  | PLBL1_HUMAN  | Phospholipase B-like 1                                                                        | PLBL1    |
| Not defined | sp    | Q6P4E1  | CASC4_HUMAN  | Protein CASC4                                                                                 | CASC4    |
| Not defined | sp    | Q6P4F2  | FDX2_HUMAN   | Ferredoxin-2, mitochondrial                                                                   | FDX2     |
| Not defined | sp    | Q6P582  | MZT2A_HUMAN  | Mitotic-spindle organizing protein 2A                                                         | MZT2A    |
| Not defined | sp    | Q6P587  | FAHD1_HUMAN  | Acylpyruvase FAHD1, mitochondrial                                                             | FAHD1    |
| Not defined | sp    | Q6P597  | KLC3_HUMAN   | Kinesin light chain 3                                                                         | KLC3     |
| Not defined | sp    | Q6P6C2  | ALKB5_HUMAN  | RNA demethylase ALKBH5                                                                        | ALKBH5   |
| Not defined | sp    | Q6P9B6  | MEAK7_HUMAN  | MTOR-associated protein MEAK7                                                                 | MEAK7    |
| Not defined | sp    | Q6PCB0  | VWA1_HUMAN   | von Willebrand factor A domain-containing protein 1                                           | VWA1     |
| Not defined | sp    | Q6PCB5  | RSBNL_HUMAN  | Lysine-specific demethylase RSBNL1                                                            | RSBNL1   |
| Not defined | sp    | Q6PCB8  | EMB_HUMAN    | Embigin                                                                                       | EMB      |
| Not defined | sp    | Q6PCT2  | FXL19_HUMAN  | F-box/LRR-repeat protein 19                                                                   | FBXL19   |
| Not defined | sp    | Q6PD74  | AAGAB_HUMAN  | Alpha- and gamma-adaptin-binding protein p34                                                  | AAGAB    |
| Not defined | sp    | Q6PH81  | CP087_HUMAN  | UPF0547 protein C16orf87                                                                      | C16orf87 |
| Not defined | sp    | Q6PI47  | KCD18_HUMAN  | BTB/POZ domain-containing protein KCTD18                                                      | KCTD18   |
| Not defined | sp    | Q6PI48  | SYDM_HUMAN   | Aspartate-tRNA ligase, mitochondrial                                                          | DARS2    |
| Not defined | sp    | Q6PI78  | TMM65_HUMAN  | Transmembrane protein 65                                                                      | TMM65    |
| Not defined | sp    | Q6PI97  | CKO88_HUMAN  | UPF0722 protein C11orf88                                                                      | C11orf88 |
| Not defined | sp    | Q6PID6  | TTC33_HUMAN  | Tetratricopeptide repeat protein 33                                                           | TTC33    |
| Not defined | sp    | Q6PIF6  | MYO7B_HUMAN  | Unconventional myosin-VIIB                                                                    | MYO7B    |
| Not defined | sp    | Q6PII3  | CC174_HUMAN  | Coiled-coil domain-containing protein 174                                                     | CCDC174  |
| Not defined | sp    | Q6PIJ6  | FBX38_HUMAN  | F-box only protein 38                                                                         | FBX38    |
| Not defined | sp    | Q6PIU2  | NCEH1_HUMAN  | Neutral cholesterol ester hydrolase 1                                                         | NCEH1    |
| Not defined | sp    | Q6PJG9  | LRFN4_HUMAN  | Leucine-rich repeat and fibronectin type-III domain-containing protein 4                      | LRFN4    |
| Not defined | sp    | Q6PK04  | CC137_HUMAN  | Coiled-coil domain-containing protein 137                                                     | CCDC137  |
| Not defined | sp    | Q6PK18  | OGFD3_HUMAN  | 2-oxoglutarate and iron-dependent oxygenase domain-containing protein 3                       | OGFD3    |
| Not defined | sp    | Q6PKG0  | LARP1_HUMAN  | La-related protein 1                                                                          | LARP1    |
| Not defined | sp    | Q6PKH6  | DR4L2_HUMAN  | Dehydrogenase/reductase SDR family member 4-like 2                                            | DHRS4L2  |
| Not defined | sp    | Q6PL24  | TMED8_HUMAN  | Protein TMED8                                                                                 | TMED8    |
| Not defined | sp    | Q6Q759  | SPG17_HUMAN  | Sperm-associated antigen 17                                                                   | SPAG17   |
| Not defined | sp    | Q6QNV0  | BL1S3_HUMAN  | Biogenesis of lysosome-related organelles complex 1 subunit 3                                 | BLOC1S3  |
| Not defined | sp    | Q6RFH5  | WDR74_HUMAN  | WD repeat-containing protein 74                                                               | WDR74    |
| Not defined | sp    | Q6RI45  | BRWD3_HUMAN  | Bromodomain and WD repeat-containing protein 3                                                | BRWD3    |
| Not defined | sp    | Q6RW13  | ATRAP_HUMAN  | Type-1 angiotensin II receptor-associated protein                                             | AGTRAP   |
| Not defined | sp    | Q6S5L8  | SHC4_HUMAN   | SHC-transforming protein 4                                                                    | SHC4     |
| Not defined | sp    | Q6STE5  | SMRD3_HUMAN  | SWI/SNF-related matrix-associated actin-dependent regulator of chromatin subfamily D member 3 | SMARD3   |
| Not defined | sp    | Q6TF13  | CC171_HUMAN  | Coiled-coil domain-containing protein 171                                                     | CCDC171  |
| Not defined | sp    | Q6UBZ8  | MAP12_HUMAN  | Methionine aminopeptidase 1D, mitochondrial                                                   | METAP1D  |
| Not defined | sp    | Q6UB99  | ANR11_HUMAN  | Ankyrin repeat domain-containing protein 11                                                   | ANKRD11  |

Supplementary Table 2.xlsx

| Cluster     | class | UNIPROT | UNIPROT_ID   | Description                                                      | GN        |
|-------------|-------|---------|--------------|------------------------------------------------------------------|-----------|
| Not defined | sp    | Q6UN15  | FIP1_HUMAN   | Pre-mRNA 3'-end-processing factor FIP1                           | FIP1L1    |
| Not defined | sp    | Q6UU9V  | CRTC1_HUMAN  | CREB-regulated transcription coactivator 1                       | CRTC1     |
| Not defined | sp    | Q6UW15  | REG3G_HUMAN  | Regenerating islet-derived protein 3-gamma                       | REG3G     |
| Not defined | sp    | Q6UW56  | ARAID_HUMAN  | All-trans retinoic acid-induced differentiation factor           | ARAID     |
| Not defined | sp    | Q6UW63  | PLGT2_HUMAN  | Protein O-glucosyltransferase 2                                  | POGLUT2   |
| Not defined | sp    | Q6UW68  | TM205_HUMAN  | Transmembrane protein 205                                        | TMEM205   |
| Not defined | sp    | Q6UW78  | UQC3_HUMAN   | Ubiquinol-cytochrome-c reductase complex assembly factor 3       | UQC3      |
| Not defined | sp    | Q6UWB1  | I27RA_HUMAN  | Interleukin-27 receptor subunit alpha                            | IL27RA    |
| Not defined | sp    | Q6UWE0  | LRSM1_HUMAN  | E3 ubiquitin-protein ligase LRSAM1                               | LRSAM1    |
| Not defined | sp    | Q6UWH4  | GAK1B_HUMAN  | Golgi-associated kinase 1B                                       | GASK1B    |
| Not defined | sp    | Q6UWJ1  | TMCO3_HUMAN  | Transmembrane and coiled-coil domain-containing protein 3        | TMCO3     |
| Not defined | sp    | Q6UWP2  | DHR11_HUMAN  | Dehydrogenase/reductase SDR family member 11                     | DHRS11    |
| Not defined | sp    | Q6UWS5  | PT117_HUMAN  | Protein PET117 homolog, mitochondrial                            | PET117    |
| Not defined | sp    | Q6UWU2  | GLB1L_HUMAN  | Beta-galactosidase-1-like protein                                | GLB1L     |
| Not defined | sp    | Q6UWV6  | ENPP7_HUMAN  | Ectonucleotide pyrophosphatase/phosphodiesterase family member 7 | ENPP7     |
| Not defined | sp    | Q6UWX4  | HIPL2_HUMAN  | HHIP-iike protein 2                                              | HIPL2     |
| Not defined | sp    | Q6UWY0  | ARSK_HUMAN   | Arylsulfatase K                                                  | ARSK      |
| Not defined | sp    | Q6UX07  | DHR13_HUMAN  | Dehydrogenase/reductase SDR family member 13                     | DHRS13    |
| Not defined | sp    | Q6UX71  | PXDC2_HUMAN  | Plexin domain-containing protein 2                               | PLXDC2    |
| Not defined | sp    | Q6UXD5  | SE6L2_HUMAN  | Seizure 6-like protein 2                                         | SEZ6L2    |
| Not defined | sp    | Q6UXF1  | TM108_HUMAN  | Transmembrane protein 108                                        | TMEM108   |
| Not defined | sp    | Q6UXH1  | CREL2_HUMAN  | Protein disulfide isomerase CRELD2                               | CRELD2    |
| Not defined | sp    | Q6LXT9  | ABH15_HUMAN  | Protein ABHD15                                                   | ABHD15    |
| Not defined | sp    | Q6UY01  | LRC31_HUMAN  | Leucine-rich repeat-containing protein 31                        | LRRC31    |
| Not defined | sp    | Q6UY14  | ATL4_HUMAN   | ADAMTS-like protein 4                                            | ADAMTSL4  |
| Not defined | sp    | Q6V017  | FAT4_HUMAN   | Protocadherin Fat 4                                              | FAT4      |
| Not defined | sp    | Q6V1P9  | PCD23_HUMAN  | Protocadherin-23                                                 | DCHS2     |
| Not defined | sp    | Q6VEQ5  | WASH2_HUMAN  | WAS protein family homolog 2                                     | WASH2P    |
| Not defined | sp    | Q6WKZ4  | RFIP1_HUMAN  | Rab11 family-interacting protein 1                               | RAB11FIP1 |
| Not defined | sp    | Q6WRI0  | IGS10_HUMAN  | Immunoglobulin superfamily member 10                             | IGSF10    |
| Not defined | sp    | Q6X9E4  | FBW12_HUMAN  | F-box/WD repeat-containing protein 12                            | FBXW12    |
| Not defined | sp    | Q6XE24  | RBMS3_HUMAN  | RNA-binding motif, single-stranded-interacting protein 3         | RBMS3     |
| Not defined | sp    | Q6XQ66  | PNCB_HUMAN   | Nicotinate phosphoribosyltransferase                             | NAPRT     |
| Not defined | sp    | Q6XZF7  | DNMBP_HUMAN  | Dynamin-binding protein                                          | DNMBP     |
| Not defined | sp    | Q6Y2X3  | DJC14_HUMAN  | DnaJ homolog subfamily C member 14                               | DNAJC14   |
| Not defined | sp    | Q6Y7W6  | GGYF2_HUMAN  | GRB10-interacting GYF protein 2                                  | GIGYF2    |
| Not defined | sp    | Q6YN16  | HSDL2_HUMAN  | Hydroxysteroid dehydrogenase-like protein 2                      | HSDL2     |
| Not defined | sp    | Q6YV21  | KAT3_HUMAN   | Kynurenine-oxoglutarate transaminase 3                           | KYAT3     |
| Not defined | sp    | Q6ZMK1  | CYHR1_HUMAN  | Cysteine and histidine-rich protein 1                            | CYHR1     |
| Not defined | sp    | Q6ZMN8  | CCN12_HUMAN  | Cyclin-I2                                                        | CCN12     |
| Not defined | sp    | Q6ZMU1  | C3P1_HUMAN   | Putative protein C3P1                                            | C3P1      |
| Not defined | sp    | Q6ZNA4  | UNC5A_HUMAN  | Netrin receptor UNC5A                                            | UNC5A     |
| Not defined | sp    | Q6ZNS5  | ZNF574_HUMAN | Zinc finger protein 574                                          | ZNF574    |
| Not defined | sp    | Q6ZNB6  | NFXL1_HUMAN  | NF-X1-type zinc finger protein NFXL1                             | NFXL1     |
| Not defined | sp    | Q6ZNC4  | ZNF704_HUMAN | Zinc finger protein 704                                          | ZNF704    |
| Not defined | sp    | Q6ZNE9  | RUFY4_HUMAN  | RUN and FYVE domain-containing protein 4                         | RUFY4     |
| Not defined | sp    | Q6ZNI1  | NBEL2_HUMAN  | Neurobeachin-like protein 2                                      | NBEAL2    |
| Not defined | sp    | Q6ZQ02  | S31D1_HUMAN  | Spermatogenesis-associated protein 31D1                          | SPATA31D1 |
| Not defined | sp    | Q6ZQ08  | WDR87_HUMAN  | WD repeat-containing protein 87                                  | WDR87     |
| Not defined | sp    | Q6ZRO8  | DYH12_HUMAN  | Dynein heavy chain 12, axonemal                                  | DNAH12    |
| Not defined | sp    | Q6ZRH7  | CTSRG_HUMAN  | Cation channel sperm-associated protein subunit gamma            | CATSPERG  |
| Not defined | sp    | Q6ZRK6  | CCD73_HUMAN  | Coiled-coil domain-containing protein 73                         | CCDC73    |
| Not defined | sp    | Q6ZRP7  | QSOX2_HUMAN  | Sulphydryl oxidase 2                                             | QSOX2     |
| Not defined | sp    | Q6ZRO5  | MMS22_HUMAN  | Protein MMS22-like                                               | MMS22L    |
| Not defined | sp    | Q6ZRZ4  | CI047_HUMAN  | Uncharacterized protein C9orf47                                  | C9orf47   |
| Not defined | sp    | Q6ZS81  | WDFY4_HUMAN  | WD repeat- and FYVE domain-containing protein 4                  | WDFY4     |
| Not defined | sp    | Q6ZS82  | R9BP_HUMAN   | Regulator of G-protein signaling 9-binding protein               | RGS9BP    |
| Not defined | sp    | Q6ZS18  | CA122_HUMAN  | Uncharacterized protein C1orf122                                 | C1orf122  |
| Not defined | sp    | Q6ZS25  | ARHG1_HUMAN  | Rho guanine nucleotide exchange factor 18                        | ARHGEF18  |
| Not defined | sp    | Q6ZT62  | BGIN_HUMAN   | Bargin                                                           | BARGIN    |
| Not defined | sp    | Q6ZTN6  | ANK13D_HUMAN | Ankyrin repeat domain-containing protein 13D                     | ANKRD13D  |
| Not defined | sp    | Q6ZTR5  | CFA47_HUMAN  | Cilia- and flagella-associated protein 47                        | CFAP47    |
| Not defined | sp    | Q6ZTR7  | FA92B_HUMAN  | Protein FAM92B                                                   | FAM92B    |
| Not defined | sp    | Q6ZU35  | CRACD_HUMAN  | Capping protein inhibiting regulator of actin dynamics           | CRACD     |
| Not defined | sp    | Q6ZU64  | CFA65_HUMAN  | Cilia- and flagella-associated protein 65                        | CFAP65    |
| Not defined | sp    | Q6ZU69  | F205A_HUMAN  | Protein FAM205A                                                  | FAM205A   |
| Not defined | sp    | Q6ZUG5  | YC006_HUMAN  | Uncharacterized protein FLJ43738                                 | -         |
| Not defined | sp    | Q6ZUI0  | TPRG1_HUMAN  | Tumor protein p63-regulated gene 1 protein                       | TPRG1     |
| Not defined | sp    | Q6ZUT1  | NKAP1_HUMAN  | Uncharacterized protein NKAP1                                    | NKAPD1    |
| Not defined | sp    | Q6ZUT9  | DENS5B_HUMAN | DENN domain-containing protein 5B                                | DENND5B   |
| Not defined | sp    | Q6ZUV0  | BACHL_HUMAN  | Putative cytosolic acyl coenzyme A thioester hydrolase-like      | ACOT7L    |
| Not defined | sp    | Q6ZV73  | FGD6_HUMAN   | FYVE, RhoGEF and PH domain-containing protein 6                  | FGD6      |
| Not defined | sp    | Q6ZVD7  | STOX1_HUMAN  | Storkhead-box protein 1                                          | STOX1     |
| Not defined | sp    | Q6ZVL6  | K154L_HUMAN  | UPF0606 protein KIAA1549L                                        | KIAA1549L |
| Not defined | sp    | Q6ZVM7  | TM1L2_HUMAN  | TOM1-like protein 2                                              | TOM1L2    |
| Not defined | sp    | Q6ZW33  | MICLK_HUMAN  | MICAL C-terminal-like protein                                    | MICALCL   |
| Not defined | sp    | Q6ZWH5  | NEK10_HUMAN  | Serine/threonine-protein kinase Nek10                            | NEK10     |
| Not defined | sp    | Q6ZXV5  | TMTC3_HUMAN  | Protein O-mannosyl-transferase TMTC3                             | TMTC3     |
| Not defined | sp    | Q6ZYL4  | TF2H5_HUMAN  | General transcription factor IIH subunit 5                       | GTTF2H5   |
| Not defined | sp    | Q709C8  | VP13C_HUMAN  | Vacuolar protein sorting-associated protein 13C                  | VPS13C    |
| Not defined | sp    | Q709F0  | ACD11_HUMAN  | Acyl-CoA dehydrogenase family member 11                          | ACAD11    |
| Not defined | sp    | Q70EL1  | UBP54_HUMAN  | Inactive ubiquitin carboxyl-terminal hydrolase 54                | USP54     |
| Not defined | sp    | Q70I99  | UN13D_HUMAN  | Protein unc-13 homolog D                                         | UNC13D    |
| Not defined | sp    | Q70UQ0  | IKIP_HUMAN   | Inhibitor of nuclear factor kappa-B kinase-interacting protein   | IKBP      |
| Not defined | sp    | Q712K3  | UB2R2_HUMAN  | Ubiquitin-conjugating enzyme E2 R2                               | UBE2R2    |
| Not defined | sp    | Q71UIM5 | RS27L_HUMAN  | 40S ribosomal protein S27-like                                   | RPS27L    |
| Not defined | sp    | Q75LS8  | FKB9L_HUMAN  | Putative FK506-binding protein 9-like protein                    | FKBP9P1   |
| Not defined | sp    | Q75MWW2 | ZNF767_HUMAN | Protein ZNF767                                                   | ZNF767P   |
| Not defined | sp    | Q765P7  | MTSS2_HUMAN  | Protein MTSS2                                                    | MTSS2     |
| Not defined | sp    | Q76N89  | HECW1_HUMAN  | E3 ubiquitin-protein ligase HECW1                                | HECW1     |

Supplementary Table 2.xlsx

| Cluster     | class | UNIPROT | UNIPROT_ID   | Description                                                                                       | GN       |
|-------------|-------|---------|--------------|---------------------------------------------------------------------------------------------------|----------|
| Not defined | sp    | Q7KYR7  | BT2A1_HUMAN  | Butyrophilin subfamily 2 member A1                                                                | BTN2A1   |
| Not defined | sp    | Q7KZ85  | SPT6H_HUMAN  | Transcription elongation factor SPT6                                                              | SUPT6H   |
| Not defined | sp    | Q7KZ99  | COX15_HUMAN  | Cytochrome c oxidase assembly protein COX15 homolog                                               | COX15    |
| Not defined | sp    | Q7L014  | DDX46_HUMAN  | Probable ATP-dependent RNA helicase DDX46                                                         | DDX46    |
| Not defined | sp    | Q7L0Y3  | TM10C_HUMAN  | tRNA methyltransferase 10 homolog C                                                               | TRMT10C  |
| Not defined | sp    | Q7L112  | SV2B_HUMAN   | Synaptic vesicle glycoprotein 2B                                                                  | SV2B     |
| Not defined | sp    | Q7L155  | CHST9_HUMAN  | Carbohydrate sulfotransferase 9                                                                   | CHST9    |
| Not defined | sp    | Q7L1T6  | NB5R4_HUMAN  | Cytochrome b5 reductase 4                                                                         | CYB5R4   |
| Not defined | sp    | Q7L1W4  | LRC8D_HUMAN  | Volume-regulated anion channel subunit LRRC8D                                                     | LRRC8D   |
| Not defined | sp    | Q7L266  | ASGL1_HUMAN  | Isoaspartyl peptidase/L-asparaginase                                                              | ASGL1    |
| Not defined | sp    | Q7L2E3  | DHX30_HUMAN  | ATP-dependent RNA helicase DHX30                                                                  | DHX30    |
| Not defined | sp    | Q7L2H7  | EIF3M_HUMAN  | Eukaryotic translation initiation factor 3 subunit M                                              | EIF3M    |
| Not defined | sp    | Q7L2J0  | MEPCE_HUMAN  | 7SK snRNA methylphosphate capping enzyme                                                          | MEPCE    |
| Not defined | sp    | Q7L4I2  | RSRC2_HUMAN  | Arginine/serine-rich coiled-coil protein 2                                                        | RSRC2    |
| Not defined | sp    | Q7L523  | RRAGA_HUMAN  | Ras-related GTP-binding protein A                                                                 | RRAGA    |
| Not defined | sp    | Q7L576  | CYFP1_HUMAN  | Cytoplasmic FMR1-interacting protein 1                                                            | CYFP1    |
| Not defined | sp    | Q7L592  | NDUF7_HUMAN  | Protein arginine methyltransferase NDUFA7, mitochondrial                                          | NDUFA7   |
| Not defined | sp    | Q7L5D6  | GET4_HUMAN   | Golgi to ER traffic protein 4 homolog                                                             | GET4     |
| Not defined | sp    | Q7L5N7  | PCAT2_HUMAN  | Lysophosphatidylcholine acyltransferase 2                                                         | LPCAT2   |
| Not defined | sp    | Q7L775  | EPMIP_HUMAN  | EPM2A-interacting protein 1                                                                       | EPM2AIP1 |
| Not defined | sp    | Q7L8J4  | 3BP5L_HUMAN  | SH3 domain-binding protein 5-like                                                                 | SH3BP5L  |
| Not defined | sp    | Q7L985  | LIGO2_HUMAN  | Leucine-rich repeat and immunoglobulin-like domain-containing nogo receptor-interacting protein 2 | LIGO2    |
| Not defined | sp    | Q7L9L4  | MOB1B_HUMAN  | MOB kinase activator 1B                                                                           | MOB1B    |
| Not defined | sp    | Q7LBR1  | CHM1B_HUMAN  | Charged multivesicular body protein 1b                                                            | CHMP1B   |
| Not defined | sp    | Q7LG56  | RIR2B_HUMAN  | Ribonucleoside-diphosphate reductase subunit M2 B                                                 | RRM2B    |
| Not defined | sp    | Q7LGA3  | HS2ST_HUMAN  | Heparan sulfate 2-O-sulfotransferase 1                                                            | HS2ST1   |
| Not defined | sp    | Q7LGC8  | CHST3_HUMAN  | Carbohydrate sulfotransferase 3                                                                   | CHST3    |
| Not defined | sp    | Q7RTR2  | NLRC3_HUMAN  | NLR family CARD domain-containing protein 3                                                       | NLRC3    |
| Not defined | sp    | Q7RTV0  | PHF5A_HUMAN  | PHD finger-like domain-containing protein 5A                                                      | PHF5A    |
| Not defined | sp    | Q7RTV2  | GSTA5_HUMAN  | Glutathione S-transferase A5                                                                      | GSTA5    |
| Not defined | sp    | Q7RTX9  | MOT14_HUMAN  | Monocarboxylate transporter 14                                                                    | SLC16A14 |
| Not defined | sp    | Q7Z2K6  | ERMP1_HUMAN  | Endoplasmic reticulum metalloproteinase 1                                                         | ERMP1    |
| Not defined | sp    | Q7Z2Y8  | GVIN1_HUMAN  | Interferon-induced very large GTPase 1                                                            | GVINP1   |
| Not defined | sp    | Q7Z353  | HDX_HUMAN    | Highly divergent homeobox                                                                         | HDX      |
| Not defined | sp    | Q7Z3B4  | NUP54_HUMAN  | Nucleoporin p54                                                                                   | NUP54    |
| Not defined | sp    | Q7Z3G6  | PRICK2_HUMAN | Prickle-like protein 2                                                                            | PRICKLE2 |
| Not defined | sp    | Q7Z3V4  | UBE3B_HUMAN  | Ubiquitin-protein ligase E3B                                                                      | UBE3B    |
| Not defined | sp    | Q7Z3Z2  | RD3_HUMAN    | Protein RD3                                                                                       | RD3      |
| Not defined | sp    | Q7Z417  | NUFIP2_HUMAN | Nuclear fragile X mental retardation-interacting protein 2                                        | NUFIP2   |
| Not defined | sp    | Q7Z434  | MAVS_HUMAN   | Mitochondrial antiviral-signaling protein                                                         | MAVS     |
| Not defined | sp    | Q7Z460  | CLAP1_HUMAN  | CLIP-associating protein 1                                                                        | CLASP1   |
| Not defined | sp    | Q7Z465  | BNIP1_HUMAN  | Bcl-2/adenovirus E1B 19 kDa-interacting protein 2-like protein                                    | BNIP1    |
| Not defined | sp    | Q7Z4G1  | COMMD6_HUMAN | COMMD domain-containing protein 6                                                                 | COMMD6   |
| Not defined | sp    | Q7Z4G4  | TRMT11_HUMAN | tRNA (guanine(10)-N2)-methyltransferase homolog                                                   | TRMT11   |
| Not defined | sp    | Q7Z4H3  | HDDC2_HUMAN  | 5'-deoxynucleotidase HDDC2                                                                        | HDDC2    |
| Not defined | sp    | Q7Z4H7  | HAUS6_HUMAN  | HAUS augmin-like complex subunit 6                                                                | HAUS6    |
| Not defined | sp    | Q7Z4H8  | PLGT3_HUMAN  | Protein O-glucosyltransferase 3                                                                   | POGLUT3  |
| Not defined | sp    | Q7Z4N2  | TRPM1_HUMAN  | Transient receptor potential cation channel subfamily M member 1                                  | TRPM1    |
| Not defined | sp    | Q7Z4P5  | GDF7_HUMAN   | Growth/differentiation factor 7                                                                   | GDF7     |
| Not defined | sp    | Q7Z4S6  | KIF21A_HUMAN | Kinesin-like protein KIF21A                                                                       | KIF21A   |
| Not defined | sp    | Q7Z569  | BRAP_HUMAN   | BRCA1-associated protein                                                                          | BRAP     |
| Not defined | sp    | Q7Z5K2  | WAPL_HUMAN   | Wings apart-like protein homolog                                                                  | WAPL     |
| Not defined | sp    | Q7Z5P9  | MUC19_HUMAN  | Mucin-19                                                                                          | MUC19    |
| Not defined | sp    | Q7Z5V7  | KCD20_HUMAN  | BTB/POZ domain-containing protein KCTD20                                                          | KCTD20   |
| Not defined | sp    | Q7Z628  | ARHG8_HUMAN  | Neuroepithelial cell-transforming gene 1 protein                                                  | NET1     |
| Not defined | sp    | Q7Z6B0  | CCD91_HUMAN  | Coiled-coil domain-containing protein 91                                                          | CCDC91   |
| Not defined | sp    | Q7Z6E9  | RBBP6_HUMAN  | E3 ubiquitin-protein ligase RBBP6                                                                 | RBBP6    |
| Not defined | sp    | Q7Z6G3  | NECA2_HUMAN  | N-terminal EF-hand calcium-binding protein 2                                                      | NECAB2   |
| Not defined | sp    | Q7Z6G8  | ANS1B_HUMAN  | Ankyrin repeat and sterile alpha motif domain-containing protein 1B                               | ANKS1B   |
| Not defined | sp    | Q7Z6K5  | ARPIN_HUMAN  | Arpin                                                                                             | ARPIN    |
| Not defined | sp    | Q7Z6L1  | TCPR1_HUMAN  | Tectonin beta-propeller repeat-containing protein 1                                               | TECPR1   |
| Not defined | sp    | Q7Z6M1  | RABEK_HUMAN  | Rab9 effector protein with kelch motifs                                                           | RABEPK   |
| Not defined | sp    | Q7Z6V5  | ADAT2_HUMAN  | tRNA-specific adenosine deaminase 2                                                               | ADAT2    |
| Not defined | sp    | Q7Z6Z7  | HUWE1_HUMAN  | E3 ubiquitin-protein ligase HUWE1                                                                 | HUWE1    |
| Not defined | sp    | Q7Z7B0  | FLIP1_HUMAN  | Filamin-A-interacting protein 1                                                                   | FLIP1    |
| Not defined | sp    | Q7Z7D3  | VTCN1_HUMAN  | V-set domain-containing T-cell activation inhibitor 1                                             | VTCN1    |
| Not defined | sp    | Q7Z7F0  | KHDC4_HUMAN  | KH homology domain-containing protein 4                                                           | KHDC4    |
| Not defined | sp    | Q7Z7G0  | TARSH_HUMAN  | Target of Nesh-SH3                                                                                | ABI3BP   |
| Not defined | sp    | Q7Z7H8  | RM10_HUMAN   | 39S ribosomal protein L10, mitochondrial                                                          | MRPL10   |
| Not defined | sp    | Q7Z7K0  | COXM1_HUMAN  | COX assembly mitochondrial protein homolog                                                        | CMC1     |
| Not defined | sp    | Q7Z7K6  | CENPV_HUMAN  | Centromere protein V                                                                              | CENPV    |
| Not defined | sp    | Q7Z7N9  | T179B_HUMAN  | Transmembrane protein 179B                                                                        | TMEM179B |
| Not defined | sp    | Q865J2  | AMIGO2_HUMAN | Amphoterin-induced protein 2                                                                      | AMIGO2   |
| Not defined | sp    | Q86T03  | PIP4P1_HUMAN | Type 1 phosphatidylinositol 4,5-bisphosphate 4-phosphatase                                        | PIP4P1   |
| Not defined | sp    | Q86T82  | UBP37_HUMAN  | Ubiquitin carboxyl-terminal hydrolase 37                                                          | USP37    |
| Not defined | sp    | Q86T90  | K1328_HUMAN  | Protein hinderin                                                                                  | KIAA1328 |
| Not defined | sp    | Q86TB3  | ALPK2_HUMAN  | Alpha-protein kinase 2                                                                            | ALPK2    |
| Not defined | sp    | Q86TB9  | PATL1_HUMAN  | Protein PAT1 homolog 1                                                                            | PATL1    |
| Not defined | sp    | Q86TI2  | DPP9_HUMAN   | Dipeptidyl peptidase 9                                                                            | DPP9     |
| Not defined | sp    | Q86TM6  | SYVN1_HUMAN  | E3 ubiquitin-protein ligase synoviolin                                                            | SYVN1    |
| Not defined | sp    | Q86TN4  | TRPT1_HUMAN  | tRNA 2'-phosphotransferase 1                                                                      | TRPT1    |
| Not defined | sp    | Q86TS9  | RM52_HUMAN   | 39S ribosomal protein L52, mitochondrial                                                          | MRPL52   |
| Not defined | sp    | Q86TU7  | SETD3_HUMAN  | Actin-histidine N-methyltransferase                                                               | SETD3    |
| Not defined | sp    | Q86TX2  | ACOT1_HUMAN  | Acyl-coenzyme A thioesterase 1                                                                    | ACOT1    |
| Not defined | sp    | Q86U06  | RBM23_HUMAN  | Probable RNA-binding protein 23                                                                   | RBM23    |
| Not defined | sp    | Q86U28  | ISCA2_HUMAN  | Iron-sulfur cluster assembly 2 homolog, mitochondrial                                             | ISCA2    |
| Not defined | sp    | Q86U38  | NOP9_HUMAN   | Nucleolar protein 9                                                                               | NOP9     |
| Not defined | sp    | Q86U44  | MTA70_HUMAN  | N6-adenosine-methyltransferase catalytic subunit                                                  | METTL3   |
| Not defined | sp    | Q86U90  | YRDC_HUMAN   | YrdC domain-containing protein, mitochondrial                                                     | YRDC     |
| Not defined | sp    | Q86UC2  | RSPH3_HUMAN  | Radial spoke head protein 3 homolog                                                               | RSPH3    |

Supplementary Table 2.xlsx

| Cluster     | class | UNIPROT | UNIPROT_ID   | Description                                                                  | GN        |
|-------------|-------|---------|--------------|------------------------------------------------------------------------------|-----------|
| Not defined | sp    | Q86UE8  | TLK2_HUMAN   | Serine/threonine-protein kinase tousel-like 2                                | TLK2      |
| Not defined | sp    | Q86UF2  | CTGE6_HUMAN  | ctTAGE family member 6                                                       | CTAGE6    |
| Not defined | sp    | Q86UG4  | SO6A1_HUMAN  | Solute carrier organic anion transporter family member 6A1                   | SLC06A1   |
| Not defined | sp    | Q86UL8  | MAGI2_HUMAN  | Membrane-associated guanylate kinase, WW and PDZ domain-containing protein 2 | MAGI2     |
| Not defined | sp    | Q86UQ4  | ABCAD_HUMAN  | ATP-binding cassette sub-family A member 13                                  | ABCA13    |
| Not defined | sp    | Q86UR1  | NOXA1_HUMAN  | NADPH oxidase activator 1                                                    | NOXA1     |
| Not defined | sp    | Q86UU0  | BCL9L_HUMAN  | B-cell CLL/lymphoma 9-like protein                                           | BCL9L     |
| Not defined | sp    | Q86UV5  | UBP48_HUMAN  | Ubiquitin carboxyl-terminal hydrolase 48                                     | USP48     |
| Not defined | sp    | Q86UW8  | HPLN4_HUMAN  | Hyaluronan and proteoglycan link protein 4                                   | HAPLN4    |
| Not defined | sp    | Q86UY8  | NT5D3_HUMAN  | 5'-nucleotidase domain-containing protein 3                                  | NT5DC3    |
| Not defined | sp    | Q86UZ6  | ZBT46_HUMAN  | Zinc finger and BTB domain-containing protein 46                             | ZBTB46    |
| Not defined | sp    | Q86V15  | CASZ1_HUMAN  | Zinc finger protein castor homolog 1                                         | CASZ1     |
| Not defined | sp    | Q86V21  | AACS_HUMAN   | Acetoacetyl-CoA synthetase                                                   | AACS      |
| Not defined | sp    | Q86V35  | CABP7_HUMAN  | Calcium-binding protein 7                                                    | CABP7     |
| Not defined | sp    | Q86V48  | LUZP1_HUMAN  | Leucine zipper protein 1                                                     | LUZP1     |
| Not defined | sp    | Q86V59  | PNM8A_HUMAN  | Paraneoplastic antigen-like protein 8A                                       | PNM8A     |
| Not defined | sp    | Q86V88  | MGDP1_HUMAN  | Magnesium-dependent phosphatase 1                                            | MDP1      |
| Not defined | sp    | Q86VD1  | MORC1_HUMAN  | MORC family CW-type zinc finger protein 1                                    | MORC1     |
| Not defined | sp    | Q86VF2  | IGFN1_HUMAN  | Immunoglobulin-like and fibronectin type III domain-containing protein 1     | IGFN1     |
| Not defined | sp    | Q86VI3  | IQGA3_HUMAN  | Ras GTPase-activating-like protein IQGAP3                                    | IQGAP3    |
| Not defined | sp    | Q86VM9  | ZCH18_HUMAN  | Zinc finger CCH domain-containing protein 18                                 | ZC3H18    |
| Not defined | sp    | Q86VP1  | TAXB1_HUMAN  | Tax1-binding protein 1                                                       | TAX1BP1   |
| Not defined | sp    | Q86VP6  | CAND1_HUMAN  | Cullin-associated NEDD8-dissociated protein 1                                | CAND1     |
| Not defined | sp    | Q86VR2  | RETR3_HUMAN  | Reticulophagy regulator 3                                                    | RETR3     |
| Not defined | sp    | Q86VR8  | FXJ1_HUMAN   | Four-jointed box protein 1                                                   | FXJ1      |
| Not defined | sp    | Q86VS8  | HOOK3_HUMAN  | Protein Hook homolog 3                                                       | HOOK3     |
| Not defined | sp    | Q86VY4  | TSYL5_HUMAN  | Testis-specific Y-encoded-like protein 5                                     | TSPLY5    |
| Not defined | sp    | Q86VZ2  | WDR5B_HUMAN  | WD repeat-containing protein 5B                                              | WDR5B     |
| Not defined | sp    | Q86VZ4  | LRP11_HUMAN  | Low-density lipoprotein receptor-related protein 11                          | LRP11     |
| Not defined | sp    | Q86W28  | NALP8_HUMAN  | NACHT, LRR and PYD domains-containing protein 8                              | NLRP8     |
| Not defined | sp    | Q86W42  | THOC6_HUMAN  | THO complex subunit 6 homolog                                                | THOC6     |
| Not defined | sp    | Q86WC4  | OSTM1_HUMAN  | Osteopetrosis-associated transmembrane protein 1                             | OSTM1     |
| Not defined | sp    | Q86W11  | PKHL1_HUMAN  | Fibrocystin-L                                                                | PKHD1L1   |
| Not defined | sp    | Q86WQ0  | NR2CA_HUMAN  | Nuclear receptor 2C2-associated protein                                      | NR2C2AP   |
| Not defined | sp    | Q86WR0  | CCD25_HUMAN  | Coiled-coil domain-containing protein 25                                     | CCD25     |
| Not defined | sp    | Q86WT6  | TRI69_HUMAN  | E3 ubiquitin-protein ligase TRIM69                                           | TRIM69    |
| Not defined | sp    | Q86WU2  | LDHD_HUMAN   | Probable D-lactate dehydrogenase, mitochondrial                              | LDHD      |
| Not defined | sp    | Q86WX3  | AROS_HUMAN   | Active regulator of SIRT1                                                    | RPS19BP1  |
| Not defined | sp    | Q86WZ0  | HEAT4_HUMAN  | HEAT repeat-containing protein 4                                             | HEATR4    |
| Not defined | sp    | Q86X29  | LSR_HUMAN    | Lipolysis-stimulated lipoprotein receptor                                    | LSR       |
| Not defined | sp    | Q86X55  | CARM1_HUMAN  | Histone-arginine methyltransferase CARM1                                     | CARM1     |
| Not defined | sp    | Q86XE0  | SNX32_HUMAN  | Sorting nexin-32                                                             | SNX32     |
| Not defined | sp    | Q86XP0  | PA24D_HUMAN  | Cytosolic phospholipase A2 delta                                             | PLA2G4D   |
| Not defined | sp    | Q86XP3  | DDX42_HUMAN  | ATP-dependent RNA helicase DDX42                                             | DDX42     |
| Not defined | sp    | Q86XR8  | CEP57_HUMAN  | Centrosomal protein of 57 kDa                                                | CEP57     |
| Not defined | sp    | Q86XS8  | GOLI_HUMAN   | E3 ubiquitin-protein ligase RNF130                                           | RNF130    |
| Not defined | sp    | Q86X79  | TM219_HUMAN  | Insulin-like growth factor-binding protein 3 receptor                        | TMEM219   |
| Not defined | sp    | Q86Y79  | PTH_HUMAN    | Probable peptidyl-tRNA hydrolase                                             | PTRH1     |
| Not defined | sp    | Q86Y82  | STX12_HUMAN  | Syntaxin-12                                                                  | STX12     |
| Not defined | sp    | Q86Y88  | ERO1B_HUMAN  | ERO1-like protein beta                                                       | ERO1B     |
| Not defined | sp    | Q86Y16  | THNS2_HUMAN  | Threonine synthase-like 2                                                    | THNSL2    |
| Not defined | sp    | Q86YQ8  | CPNE8_HUMAN  | Copine-8                                                                     | CPNE8     |
| Not defined | sp    | Q86YR7  | MF2L2_HUMAN  | Probable guanine nucleotide exchange factor MCF2L2                           | MCF2L2    |
| Not defined | sp    | Q86YS3  | RFIP4_HUMAN  | Rab11 family-interacting protein 4                                           | RAB11FIP4 |
| Not defined | sp    | Q86YS7  | C2CD5_HUMAN  | C2 domain-containing protein 5                                               | C2CD5     |
| Not defined | sp    | Q86YT9  | JAML_HUMAN   | Junctional adhesion molecule-like                                            | JAML      |
| Not defined | sp    | Q86YV6  | MYLK4_HUMAN  | Myosin light chain kinase family member 4                                    | MYLK4     |
| Not defined | sp    | Q86YW9  | MD12L_HUMAN  | Mediator of RNA polymerase II transcription subunit 12-like protein          | MED12L    |
| Not defined | sp    | Q86Y23  | HORN_HUMAN   | Hornerin                                                                     | HRNR      |
| Not defined | sp    | Q8IU54  | IFNL1_HUMAN  | Interferon lambda-1                                                          | IFNL1     |
| Not defined | sp    | Q8IU89  | CERS3_HUMAN  | Ceramide synthase 3                                                          | CERS3     |
| Not defined | sp    | Q8IU2D  | RB612_HUMAN  | ELKS/Rab6-interacting/CAST family member 1                                   | ERC1      |
| Not defined | sp    | Q8IUE0  | TF2LY_HUMAN  | Homeobox protein TGIF2LY                                                     | TGIF2LY   |
| Not defined | sp    | Q8IUE1  | TF2LX_HUMAN  | Homeobox protein TGIF2LX                                                     | TGIF2LX   |
| Not defined | sp    | Q8IUF1  | CBWD2_HUMAN  | COBW domain-containing protein 2                                             | CBWD2     |
| Not defined | sp    | Q8IUF8  | RIOX2_HUMAN  | Ribosomal oxygenase 2                                                        | RIOX2     |
| Not defined | sp    | Q8IUG5  | MYO18B_HUMAN | Unconventional myosin-XVIIIb                                                 | MYO18B    |
| Not defined | sp    | Q8IUH5  | ZDH17_HUMAN  | Palmitoyltransferase ZDHHC17                                                 | ZDHHC17   |
| Not defined | sp    | Q8IUI8  | CRLF3_HUMAN  | Cytokine receptor-like factor 3                                              | CRLF3     |
| Not defined | sp    | Q8IUW5  | RELL1_HUMAN  | REL-like protein 1                                                           | RELL1     |
| Not defined | sp    | Q8IUX4  | ABC3F_HUMAN  | DNA dC->dU-editing enzyme APOBEC-3F                                          | APOBEC3F  |
| Not defined | sp    | Q8IUX7  | AEBP1_HUMAN  | Adipocyte enhancer-binding protein 1                                         | AEBP1     |
| Not defined | sp    | Q8IUZ5  | AT2L2_HUMAN  | 5-phosphohydroxy-L-lysine phospho-lyase                                      | PHYKPL    |
| Not defined | sp    | Q8IV38  | ANKY2_HUMAN  | Ankyrin repeat and MYND domain-containing protein 2                          | ANKMY2    |
| Not defined | sp    | Q8IV50  | LYSM2_HUMAN  | LysM and putative peptidoglycan-binding domain-containing protein 2          | LYSM2     |
| Not defined | sp    | Q8IV56  | PRR15_HUMAN  | Proline-rich protein 15                                                      | PRR15     |
| Not defined | sp    | Q8IVD9  | NUDC3_HUMAN  | NudC domain-containing protein 3                                             | NUDC3     |
| Not defined | sp    | Q8IVF2  | AHNAK2_HUMAN | Protein AHNAK2                                                               | AHNAK2    |
| Not defined | sp    | Q8IVF5  | TIAM2_HUMAN  | T-lymphoma invasion and metastasis-inducing protein 2                        | TIAM2     |
| Not defined | sp    | Q8IVG5  | SAM9L_HUMAN  | Sterile alpha motif domain-containing protein 9-like                         | SAMD9L    |
| Not defined | sp    | Q8IVH8  | M4K3_HUMAN   | Mitogen-activated protein kinase kinase kinase 3                             | MAP4K3    |
| Not defined | sp    | Q8IVL0  | NAV3_HUMAN   | Neuron navigator 3                                                           | NAV3      |
| Not defined | sp    | Q8IVL1  | NAV2_HUMAN   | Neuron navigator 2                                                           | NAV2      |
| Not defined | sp    | Q8IVL5  | P3H2_HUMAN   | Prolyl 3-hydroxylase 2                                                       | P3H2      |
| Not defined | sp    | Q8IVL6  | P3H3_HUMAN   | Prolyl 3-hydroxylase 3                                                       | P3H3      |
| Not defined | sp    | Q8IVM0  | CCD50_HUMAN  | Coiled-coil domain-containing protein 50                                     | CCD50     |
| Not defined | sp    | Q8IVP5  | FUND1_HUMAN  | FUN14 domain-containing protein 1                                            | FUND1     |
| Not defined | sp    | Q8IVT2  | MISP_HUMAN   | Mitotic interactor and substrate of PLK1                                     | MISP      |
| Not defined | sp    | Q8IVV2  | LOXH1_HUMAN  | Lipoxygenase homology domain-containing protein 1                            | LOXHD1    |
| Not defined | sp    | Q8IW19  | APLF_HUMAN   | Aprataxin and PNK-like factor                                                | APLF      |

Supplementary Table 2.xlsx

| Cluster     | class | UNIPROT | UNIPROT_ID  | Description                                                               | GN         |
|-------------|-------|---------|-------------|---------------------------------------------------------------------------|------------|
| Not defined | sp    | Q81W41  | MAPK5_HUMAN | MAP kinase-activated protein kinase 5                                     | MAPKAPK5   |
| Not defined | sp    | Q81W45  | NNRD_HUMAN  | ATP-dependent (S)-NAD(P)H-hydrate dehydratase                             | NAXD       |
| Not defined | sp    | Q81W92  | GLBL2_HUMAN | Beta-galactosidase-1-like protein 2                                       | GLBL12     |
| Not defined | sp    | Q81W93  | ARHGJ_HUMAN | Rho guanine nucleotide exchange factor 19                                 | ARHGEF19   |
| Not defined | sp    | Q81W45  | CTL2_HUMAN  | Choline transporter-like protein 2                                        | SLC44A2    |
| Not defined | sp    | Q81WA6  | CCD60_HUMAN | Coiled-coil domain-containing protein 60                                  | CCDC60     |
| Not defined | sp    | Q81WC1  | MA7D3_HUMAN | MAP7 domain-containing protein 3                                          | MAP7D3     |
| Not defined | sp    | Q81WE2  | NXP20_HUMAN | Protein NOXP20                                                            | FAM114A1   |
| Not defined | sp    | Q81W19  | MGAP_HUMAN  | MAX gene-associated protein                                               | MGA        |
| Not defined | sp    | Q81WL3  | HSC20_HUMAN | Iron-sulfur cluster co-chaperone protein HscB                             | HSCB       |
| Not defined | sp    | Q81WN7  | RP1L1_HUMAN | Retinitis pigmentosa 1-like 1 protein                                     | RP1L1      |
| Not defined | sp    | Q81WQ3  | BRSK2_HUMAN | Serine/threonine-protein kinase BRSK2                                     | BRSK2      |
| Not defined | sp    | Q81W50  | PHF6_HUMAN  | PHD finger protein 6                                                      | PHF6       |
| Not defined | sp    | Q81WT0  | ARCH_HUMAN  | Protein archease                                                          | ZBTB80S    |
| Not defined | sp    | Q81WT3  | CUL9_HUMAN  | Cullin-9                                                                  | CUL9       |
| Not defined | sp    | Q81WV7  | UBR1_HUMAN  | E3 ubiquitin-protein ligase UBR1                                          | UBR1       |
| Not defined | sp    | Q81WX8  | CHERP_HUMAN | Calcium homeostasis endoplasmic reticulum protein                         | CHERP      |
| Not defined | sp    | Q81WZ3  | ANKH1_HUMAN | Ankyrin repeat and KH domain-containing protein 1                         | ANKHD1     |
| Not defined | sp    | Q81WZ5  | TRI42_HUMAN | Tripartite motif-containing protein 42                                    | TRIM42     |
| Not defined | sp    | Q81X03  | KIBRA_HUMAN | Protein KIBRA                                                             | WWC1       |
| Not defined | sp    | Q81X04  | UEVLD_HUMAN | Ubiquitin-conjugating enzyme E2 variant 3                                 | UEVLD      |
| Not defined | sp    | Q81X12  | CCAR1_HUMAN | Cell division cycle and apoptosis regulator protein 1                     | CCAR1      |
| Not defined | sp    | Q81X90  | SKA3_HUMAN  | Spindle and kinetochore-associated protein 3                              | SKA3       |
| Not defined | sp    | Q81XH7  | NELFD_HUMAN | Negative elongation factor C/D                                            | NELFCD     |
| Not defined | sp    | Q81XI1  | MIRO2_HUMAN | Mitochondrial Rho GTPase 2                                                | RHO2       |
| Not defined | sp    | Q81XJ6  | SIR2_HUMAN  | NAD-dependent protein deacetylase siruin-2                                | SIRT2      |
| Not defined | sp    | Q81XK2  | GLT12_HUMAN | Polypeptide N-acetylgalactosaminyltransferase 12                          | GALNT12    |
| Not defined | sp    | Q81XL6  | FA20C_HUMAN | Extracellular serine/threonine protein kinase FAM20C                      | FAM20C     |
| Not defined | sp    | Q81XL7  | MSRB3_HUMAN | Methionine-R-sulfoxide reductase B3                                       | MSRB3      |
| Not defined | sp    | Q81XM2  | BAP18_HUMAN | Chromatin complexes subunit BAP18                                         | BAP18      |
| Not defined | sp    | Q81XM3  | RM41_HUMAN  | 39S ribosomal protein L41, mitochondrial                                  | MRP141     |
| Not defined | sp    | Q81XQ4  | GPAM1_HUMAN | GPALPP motifs-containing protein 1                                        | GPALPP1    |
| Not defined | sp    | Q81XS2  | DRC2_HUMAN  | Dynein regulatory complex subunit 2                                       | CCDC65     |
| Not defined | sp    | Q81XT5  | RB12B_HUMAN | RNA-binding protein 12B                                                   | RBM12B     |
| Not defined | sp    | Q81XZ3  | SP8_HUMAN   | Transcription factor Sp8                                                  | SP8        |
| Not defined | sp    | Q81Y18  | SMC5_HUMAN  | Structural maintenance of chromosomes protein 5                           | SMC5       |
| Not defined | sp    | Q81Y37  | DHX37_HUMAN | Probable ATP-dependent RNA helicase DHX37                                 | DHX37      |
| Not defined | sp    | Q81Y49  | PAQRA_HUMAN | Monocyte to macrophage differentiation factor 2                           | MMD2       |
| Not defined | sp    | Q81Y57  | YAF2_HUMAN  | YY1-associated factor 2                                                   | YAF2       |
| Not defined | sp    | Q81YB5  | SMAP1_HUMAN | Stromal membrane-associated protein 1                                     | SMAP1      |
| Not defined | sp    | Q81YB8  | SUV3_HUMAN  | ATP-dependent RNA helicase SUPV3L1, mitochondrial                         | SUPV3L1    |
| Not defined | sp    | Q81YD8  | FANCM_HUMAN | Fanconi anemia group M protein                                            | FANCM      |
| Not defined | sp    | Q81YE0  | CC146_HUMAN | Coiled-coil domain-containing protein 146                                 | CCDC146    |
| Not defined | sp    | Q81YJ1  | CPNE9_HUMAN | Copine-9                                                                  | CPNE9      |
| Not defined | sp    | Q81YJ3  | SYTL1_HUMAN | Synaptotagmin-like protein 1                                              | SYTL1      |
| Not defined | sp    | Q81YK4  | GT252_HUMAN | Procollagen galactosyltransferase 2                                       | COLGALT2   |
| Not defined | sp    | Q81YK8  | REM2_HUMAN  | GTP-binding protein REM 2                                                 | REM2       |
| Not defined | sp    | Q81YL3  | CA174_HUMAN | UPF0688 protein C1orf174                                                  | C1orf174   |
| Not defined | sp    | Q81YS1  | P20D2_HUMAN | Peptidase M20 domain-containing protein 2                                 | PM20D2     |
| Not defined | sp    | Q81YS2  | K2013_HUMAN | Uncharacterized protein KIAA2013                                          | KIAA2013   |
| Not defined | sp    | Q81Z21  | PHAR4_HUMAN | Phosphatase and actin regulator 4                                         | PHACTR4    |
| Not defined | sp    | Q81Z52  | CHSS2_HUMAN | Chondroitin sulfate synthase 2                                            | CHPF       |
| Not defined | sp    | Q81Z83  | A16A1_HUMAN | Aldehyde dehydrogenase family 16 member A1                                | ALDH16A1   |
| Not defined | sp    | Q81ZAO  | K319L_HUMAN | Dyslexia-associated protein KIAA0319-like protein                         | KIAA0319L  |
| Not defined | sp    | Q81ZC7  | ZN101_HUMAN | Zinc finger protein 101                                                   | ZNF101     |
| Not defined | sp    | Q81ZD4  | DCP1B_HUMAN | mRNA-decapping enzyme 1B                                                  | DCP1B      |
| Not defined | sp    | Q81ZD9  | DOCK3_HUMAN | Dedicator of cytokinesis protein 3                                        | DOCK3      |
| Not defined | sp    | Q81ZH2  | XRN1_HUMAN  | 5'-3' exoribonuclease 1                                                   | XRN1       |
| Not defined | sp    | Q81ZK6  | MCLN2_HUMAN | Mucolipin-2                                                               | MCOLN2     |
| Not defined | sp    | Q81ZL8  | PELP1_HUMAN | Proline-, glutamic acid- and leucine-rich protein 1                       | PELP1      |
| Not defined | sp    | Q81ZL9  | CDK20_HUMAN | Cyclin-dependent kinase 20                                                | CDK20      |
| Not defined | sp    | Q81ZM9  | S38A6_HUMAN | Probable sodium-coupled neutral amino acid transporter 6                  | SLC38A6    |
| Not defined | sp    | Q81ZP0  | ABI1_HUMAN  | Abl interactor 1                                                          | ABI1       |
| Not defined | sp    | Q81ZQ5  | SELH_HUMAN  | Selenoprotein H                                                           | SELENOH    |
| Not defined | sp    | Q81ZS5  | OFCC1_HUMAN | Orofacial cleft 1 candidate gene 1 protein                                | OFCC1      |
| Not defined | sp    | Q81ZT6  | ASPM_HUMAN  | Abnormal spindle-like microcephaly-associated protein                     | ASPM       |
| Not defined | sp    | Q81ZU1  | FAM9A_HUMAN | Protein FAM9A                                                             | FAM9A      |
| Not defined | sp    | Q81ZX4  | TAF1L_HUMAN | Transcription initiation factor TFIID subunit 1-like                      | TAF1L      |
| Not defined | sp    | Q81ZY2  | ABCA7_HUMAN | Phospholipid-transporting ATPase ABCA7                                    | ABCA7      |
| Not defined | sp    | Q8N0S2  | SYCE1_HUMAN | Synaptonemal complex central element protein 1                            | SYCE1      |
| Not defined | sp    | Q8N0S6  | CENPL_HUMAN | Centromere protein L                                                      | CENPL      |
| Not defined | sp    | Q8N0T1  | RBIS_HUMAN  | Ribosomal biogenesis factor                                               | RBIS       |
| Not defined | sp    | Q8N0V4  | LG12_HUMAN  | Leucine-rich repeat LG1 family member 2                                   | LG12       |
| Not defined | sp    | Q8N0X4  | CLYBL_HUMAN | Citramalyl-CoA lyase, mitochondrial                                       | CLYBL      |
| Not defined | sp    | Q8N0Z9  | VS110_HUMAN | V-set and immunoglobulin domain-containing protein 10                     | VSIG10     |
| Not defined | sp    | Q8N108  | MIER1_HUMAN | Mesoderm induction early response protein 1                               | MIER1      |
| Not defined | sp    | Q8N111  | CEND_HUMAN  | Cell cycle exit and neuronal differentiation protein 1                    | CEND1      |
| Not defined | sp    | Q8N128  | F177A_HUMAN | Protein FAM177A1                                                          | FAM177A1   |
| Not defined | sp    | Q8N129  | CNPY4_HUMAN | Protein canopy homolog 4                                                  | CNPY4      |
| Not defined | sp    | Q8N142  | PURA1_HUMAN | Adenylosuccinate synthetase isozyme 1                                     | ADSS1      |
| Not defined | sp    | Q8N157  | AH1_HUMAN   | Joubertin                                                                 | AH1        |
| Not defined | sp    | Q8N163  | CCAR2_HUMAN | Cell cycle and apoptosis regulator protein 2                              | CCAR2      |
| Not defined | sp    | Q8N196  | SIX5_HUMAN  | Homeobox protein SIX5                                                     | SIX5       |
| Not defined | sp    | Q8N184  | VPS52_HUMAN | Vacuolar protein sorting-associated protein 52 homolog                    | VPS52      |
| Not defined | sp    | Q8N1D0  | BWR1B_HUMAN | Beckwith-Wiedemann syndrome chromosomal region 1 candidate gene B protein | SLC22A18AS |
| Not defined | sp    | Q8N1F7  | NUP93_HUMAN | Nuclear pore complex protein Nup93                                        | NUP93      |
| Not defined | sp    | Q8N1F8  | S11IP_HUMAN | Serine/threonine-protein kinase 11-interacting protein                    | STK11IP    |
| Not defined | sp    | Q8N1G2  | CMTR1_HUMAN | Cap-specific mRNA (nucleoside-2'-O)-methyltransferase 1                   | CMTR1      |
| Not defined | sp    | Q8N1G4  | LRC47_HUMAN | Leucine-rich repeat-containing protein 47                                 | LRC47      |
| Not defined | sp    | Q8N1H7  | S60S1_HUMAN | Protein SIX60S1                                                           | SIX60S1    |



Supplementary Table 2.xlsx

| Cluster     | class | UNIPROT | UNIPROT_ID  | Description                                                                | GN         |
|-------------|-------|---------|-------------|----------------------------------------------------------------------------|------------|
| Not defined | sp    | Q8N1I0  | DOCK4_HUMAN | Dedicator of cytokinesis protein 4                                         | DOCK4      |
| Not defined | sp    | Q8N1M1  | BEST3_HUMAN | Bestrophin-3                                                               | BEST3      |
| Not defined | sp    | Q8N1Q1  | CAH13_HUMAN | Carbonic anhydrase 13                                                      | CA13       |
| Not defined | sp    | Q8N1W1  | ARG28_HUMAN | Rho guanine nucleotide exchange factor 28                                  | ARGHEF28   |
| Not defined | sp    | Q8N201  | INT1_HUMAN  | Integrator complex subunit 1                                               | INTS1      |
| Not defined | sp    | Q8N283  | ANR35_HUMAN | Ankyrin repeat domain-containing protein 35                                | ANKRD35    |
| Not defined | sp    | Q8N2F6  | ARM10_HUMAN | Armadillo repeat-containing protein 10                                     | ARMC10     |
| Not defined | sp    | Q8N2I9  | STK40_HUMAN | Serine/threonine-protein kinase 40                                         | STK40      |
| Not defined | sp    | Q8N2M8  | CLASR_HUMAN | CLK4-associating serine/arginine rich protein                              | CLASRP     |
| Not defined | sp    | Q8N2Q7  | NLGN1_HUMAN | Neuroigin-1                                                                | NLGN1      |
| Not defined | sp    | Q8N2R0  | OSR2_HUMAN  | Protein odd-skipped-related 2                                              | OSR2       |
| Not defined | sp    | Q8N2S1  | LTBP4_HUMAN | Latent-transforming growth factor beta-binding protein 4                   | LTBP4      |
| Not defined | sp    | Q8N2U0  | TM256_HUMAN | Transmembrane protein 256                                                  | TMEM256    |
| Not defined | sp    | Q8N2Z9  | CENP5_HUMAN | Centromere protein 5                                                       | CENP5      |
| Not defined | sp    | Q8N3C0  | ASCC3_HUMAN | Activating signal cointegrator 1 complex subunit 3                         | ASCC3      |
| Not defined | sp    | Q8N3D4  | EH1L1_HUMAN | EH domain-binding protein 1-like protein 1                                 | EHBP1L1    |
| Not defined | sp    | Q8N3F8  | MILK1_HUMAN | MICAL-like protein 1                                                       | MICAL1     |
| Not defined | sp    | Q8N3J6  | CADM2_HUMAN | Cell adhesion molecule 2                                                   | CADM2      |
| Not defined | sp    | Q8N3K9  | CMYA5_HUMAN | Cardiomyopathy-associated protein 5                                        | CMYA5      |
| Not defined | sp    | Q8N3L3  | TXLNB_HUMAN | Beta-taxilin                                                               | TXLNB      |
| Not defined | sp    | Q8N3P4  | VPS8_HUMAN  | Vacuolar protein sorting-associated protein 8 homolog                      | VPS8       |
| Not defined | sp    | Q8N3R9  | MPP5_HUMAN  | MAGUK p55 subfamily member 5                                               | MPP5       |
| Not defined | sp    | Q8N3T6  | T132C_HUMAN | Transmembrane protein 132C                                                 | TMEM132C   |
| Not defined | sp    | Q8N3X1  | FNBP4_HUMAN | Formin-binding protein 4                                                   | FNBP4      |
| Not defined | sp    | Q8N475  | FSTL5_HUMAN | Follistatin-related protein 5                                              | FSTL5      |
| Not defined | sp    | Q8N4A0  | GALT4_HUMAN | Polypeptide N-acetylgalactosaminyltransferase 4                            | GALNT4     |
| Not defined | sp    | Q8N4H5  | TOM5_HUMAN  | Mitochondrial import receptor subunit TOM5 homolog                         | TOMM5      |
| Not defined | sp    | Q8N4J0  | CARME_HUMAN | Carnosine N-methyltransferase                                              | CARNMT1    |
| Not defined | sp    | Q8N4Q0  | PTGR3_HUMAN | Prostaglandin reductase 3                                                  | ZADH2      |
| Not defined | sp    | Q8N4T8  | CBR4_HUMAN  | Carbonyl reductase family member 4                                         | CBR4       |
| Not defined | sp    | Q8N4V1  | MMGT1_HUMAN | Membrane magnesium transporter 1                                           | MMGT1      |
| Not defined | sp    | Q8N543  | OGFD1_HUMAN | Prolyl 3-hydroxylase OGFOD1                                                | OGFOD1     |
| Not defined | sp    | Q8N554  | ZN276_HUMAN | Zinc finger protein 276                                                    | ZNF276     |
| Not defined | sp    | Q8N5F7  | NKAP_HUMAN  | NF-kappa-B-activating protein                                              | NKAP       |
| Not defined | sp    | Q8N5G0  | SIM20_HUMAN | Small integral membrane protein 20                                         | SMM20      |
| Not defined | sp    | Q8N5I2  | ARRD1_HUMAN | Arrestin domain-containing protein 1                                       | ARRDC1     |
| Not defined | sp    | Q8N5I9  | CLO45_HUMAN | Uncharacterized protein C12orf45                                           | C12orf45   |
| Not defined | sp    | Q8N5K1  | CISD2_HUMAN | CDGSH iron-sulfur domain-containing protein 2                              | CISD2      |
| Not defined | sp    | Q8N5L8  | RP25L_HUMAN | Ribonuclease P protein subunit p25-like protein                            | RPP25L     |
| Not defined | sp    | Q8N5M4  | TTC9C_HUMAN | Tetratricopeptide repeat protein 9C                                        | TTC9C      |
| Not defined | sp    | Q8N5P1  | ZC3H8_HUMAN | Zinc finger CCCH domain-containing protein 8                               | ZC3H8      |
| Not defined | sp    | Q8N5R6  | CCD33_HUMAN | Coiled-coil domain-containing protein 33                                   | CCDC33     |
| Not defined | sp    | Q8N668  | COMD1_HUMAN | COMM domain-containing protein 1                                           | COMMD1     |
| Not defined | sp    | Q8N6G2  | TEX26_HUMAN | Testis-expressed protein 26                                                | TEX26      |
| Not defined | sp    | Q8N6G5  | CGAT2_HUMAN | Chondroitin sulfate N-acetylgalactosaminyltransferase 2                    | CSGALNACT2 |
| Not defined | sp    | Q8N6H7  | ARFG2_HUMAN | ADP-ribosylation factor GTPase-activating protein 2                        | ARFGAP2    |
| Not defined | sp    | Q8N6K7  | SAMD3_HUMAN | Sterile alpha motif domain-containing protein 3                            | SAMD3      |
| Not defined | sp    | Q8N6M0  | OTU6B_HUMAN | Deubiquitinase OTUD6B                                                      | OTUD6B     |
| Not defined | sp    | Q8N6N3  | CAO52_HUMAN | UPF0690 protein C1orf52                                                    | C1orf52    |
| Not defined | sp    | Q8N6N7  | ACBD7_HUMAN | Acyl-CoA-binding domain-containing protein 7                               | ACBD7      |
| Not defined | sp    | Q8N6T3  | ARFG1_HUMAN | ADP-ribosylation factor GTPase-activating protein 1                        | ARFGAP1    |
| Not defined | sp    | Q8N6T7  | SIRT6_HUMAN | NAD-dependent protein deacetylase sirtuin-6                                | SIRT6      |
| Not defined | sp    | Q8N720  | ZN655_HUMAN | Zinc finger protein 655                                                    | ZNF655     |
| Not defined | sp    | Q8N752  | KC1AL_HUMAN | Casein kinase I isoform alpha-like                                         | CSNK1A1L   |
| Not defined | sp    | Q8N766  | EMC1_HUMAN  | ER membrane protein complex subunit 1                                      | EMC1       |
| Not defined | sp    | Q8N7A1  | KLDC1_HUMAN | Kelch domain-containing protein 1                                          | KLHDC1     |
| Not defined | sp    | Q8N7B9  | EFCB3_HUMAN | EF-hand calcium-binding domain-containing protein 3                        | EFCAB3     |
| Not defined | sp    | Q8N7E2  | CBLL2_HUMAN | E3 ubiquitin-protein ligase CBLL2                                          | CBLL2      |
| Not defined | sp    | Q8N7H5  | PAF1_HUMAN  | RNA polymerase II-associated factor 1 homolog                              | PAF1       |
| Not defined | sp    | Q8N7K0  | ZN433_HUMAN | Zinc finger protein 433                                                    | ZNF433     |
| Not defined | sp    | Q8N7X1  | RMXL3_HUMAN | RNA-binding motif protein, X-linked-like-3                                 | RBMXL3     |
| Not defined | sp    | Q8N806  | UBR7_HUMAN  | Putative E3 ubiquitin-protein ligase UBR7                                  | UBR7       |
| Not defined | sp    | Q8N841  | TTL6_HUMAN  | Tubulin polyglutamylase TTL6                                               | TTL6       |
| Not defined | sp    | Q8N878  | FRMD1_HUMAN | FERM domain-containing protein 1                                           | FRMD1      |
| Not defined | sp    | Q8N884  | CGAS_HUMAN  | Cyclic GMP-AMP synthase                                                    | CGAS       |
| Not defined | sp    | Q8N895  | ZN366_HUMAN | Zinc finger protein 366                                                    | ZNF366     |
| Not defined | sp    | Q8N8A2  | ANR44_HUMAN | Serine/threonine-protein phosphatase 6 regulatory ankyrin repeat subunit B | ANKRD44    |
| Not defined | sp    | Q8N8E3  | CE112_HUMAN | Centrosomal protein of 112 kDa                                             | CEP112     |
| Not defined | sp    | Q8N8J7  | F241A_HUMAN | Uncharacterized protein FAM241A                                            | FAM241A    |
| Not defined | sp    | Q8N8N7  | PTGR2_HUMAN | Prostaglandin reductase 2                                                  | PTGR2      |
| Not defined | sp    | Q8N8S7  | ENAH_HUMAN  | Protein enabled homolog                                                    | ENAH       |
| Not defined | sp    | Q8N8V2  | GBP7_HUMAN  | Guanylate-binding protein 7                                                | GBP7       |
| Not defined | sp    | Q8N9B5  | JMY_HUMAN   | Junction-mediating and -regulatory protein                                 | JMY        |
| Not defined | sp    | Q8N9E0  | F133A_HUMAN | Protein FAM133A                                                            | FAM133A    |
| Not defined | sp    | Q8N9H8  | MUT7_HUMAN  | Exonuclease mut-7 homolog                                                  | EXD3       |
| Not defined | sp    | Q8N9I0  | SYT2_HUMAN  | Synaptotagmin-2                                                            | SYT2       |
| Not defined | sp    | Q8N9N2  | ASCC1_HUMAN | Activating signal cointegrator 1 complex subunit 1                         | ASCC1      |
| Not defined | sp    | Q8N9N7  | LRC57_HUMAN | Leucine-rich repeat-containing protein 57                                  | LRRC57     |
| Not defined | sp    | Q8N9T8  | KRI1_HUMAN  | Protein KRI1 homolog                                                       | KRI1       |
| Not defined | sp    | Q8N9V7  | TOPZ1_HUMAN | Protein TOPAZ1                                                             | TOPAZ1     |
| Not defined | sp    | Q8N9W4  | GG6L2_HUMAN | Golgin subfamily A member 6-like protein 2                                 | GOLGA6L2   |
| Not defined | sp    | Q8N9Y4  | F181A_HUMAN | Protein FAM181A                                                            | FAM181A    |
| Not defined | sp    | Q8NA03  | FSIP1_HUMAN | Fibrous sheath-interacting protein 1                                       | FSIP1      |
| Not defined | sp    | Q8NA19  | LMBL4_HUMAN | Lethal[3]malignant brain tumor-like protein 4                              | L3MBTL4    |
| Not defined | sp    | Q8NA47  | CCD63_HUMAN | Coiled-coil domain-containing protein 63                                   | CCDC63     |
| Not defined | sp    | Q8NA70  | FA47B_HUMAN | Protein FAM47B                                                             | FAM47B     |
| Not defined | sp    | Q8NA72  | POC5_HUMAN  | Centrosomal protein POC5                                                   | POC5       |
| Not defined | sp    | Q8NAP3  | ZBT38_HUMAN | Zinc finger and BTB domain-containing protein 38                           | ZBTB38     |
| Not defined | sp    | Q8NAT2  | TDRD5_HUMAN | Tudor domain-containing protein 5                                          | TDRD5      |
| Not defined | sp    | Q8NAV1  | PR38A_HUMAN | Pre-mRNA-splicing factor 38A                                               | PRPF38A    |

Supplementary Table 2.xlsx

| Cluster     | class | UNIPROT | UNIPROT_ID   | Description                                                          | GN          |
|-------------|-------|---------|--------------|----------------------------------------------------------------------|-------------|
| Not defined | sp    | Q8NB25  | F184A_HUMAN  | Protein FAM184A                                                      | FAM184A     |
| Not defined | sp    | Q8NB37  | GALD1_HUMAN  | Glutamine amidotransferase-like class 1 domain-containing protein 1  | GATD1       |
| Not defined | sp    | Q8NB90  | AFG2H_HUMAN  | ATPase family protein 2 homolog                                      | SPATA5      |
| Not defined | sp    | Q8NBF2  | NHLC2_HUMAN  | NHL repeat-containing protein 2                                      | NHLRC2      |
| Not defined | sp    | Q8NB16  | XXLT1_HUMAN  | Xyloside xylosyltransferase 1                                        | XXYL1       |
| Not defined | sp    | Q8NBJ4  | GOLM1_HUMAN  | Golgi membrane protein 1                                             | GOLM1       |
| Not defined | sp    | Q8NBK3  | SUMF1_HUMAN  | Formylglycine-generating enzyme                                      | SUMF1       |
| Not defined | sp    | Q8NBL1  | PGLT1_HUMAN  | Protein O-glucosyltransferase 1                                      | POGLUT1     |
| Not defined | sp    | Q8NBM8  | PCYXL_HUMAN  | Prenylcysteine oxidase-like                                          | PCYOX1L     |
| Not defined | sp    | Q8NBN3  | TM87A_HUMAN  | Transmembrane protein 87A                                            | TMEM87A     |
| Not defined | sp    | Q8NBN7  | RDH13_HUMAN  | Retinol dehydrogenase 13                                             | RDH13       |
| Not defined | sp    | Q8NBP5  | MFS9_HUMAN   | Major facilitator superfamily domain-containing protein 9            | MFS9        |
| Not defined | sp    | Q8NBP7  | PCSK9_HUMAN  | Proprotein convertase subtilisin/kexin type 9                        | PCSK9       |
| Not defined | sp    | Q8NBQ5  | DHB11_HUMAN  | Estradiol 17-beta-dehydrogenase 11                                   | HSD17B11    |
| Not defined | sp    | Q8NB72  | SPC24_HUMAN  | Kinetochore protein Spc24                                            | SPC24       |
| Not defined | sp    | Q8NBX0  | SCPD1_HUMAN  | Saccharopine dehydrogenase-like oxidoreductase                       | SCCPDH      |
| Not defined | sp    | Q8NBZ7  | UXS1_HUMAN   | UDP-glucuronic acid decarboxylase 1                                  | UXS1        |
| Not defined | sp    | Q8NC42  | RNF149_HUMAN | E3 ubiquitin-protein ligase RNF149                                   | RNF149      |
| Not defined | sp    | Q8NCA5  | FA98A_HUMAN  | Protein FAM98A                                                       | FAM98A      |
| Not defined | sp    | Q8NCA9  | ZN784_HUMAN  | Zinc finger protein 784                                              | ZNF784      |
| Not defined | sp    | Q8NCC3  | PAG15_HUMAN  | Phospholipase A2 group XV                                            | PLA2G15     |
| Not defined | sp    | Q8NCE2  | MTMR4_HUMAN  | Myotubularin-related protein 14                                      | MTMR4       |
| Not defined | sp    | Q8NCF5  | NF21P_HUMAN  | NFATC2-interacting protein                                           | NFATC2IP    |
| Not defined | sp    | Q8NCI6  | GLBL3_HUMAN  | Beta-galactosidase-1-like protein 3                                  | GLBL3       |
| Not defined | sp    | Q8NCJ5  | SPRY3_HUMAN  | SPRY domain-containing protein 3                                     | SPRY3       |
| Not defined | sp    | Q8NCR5  | PDP1_HUMAN   | Pyruvate dehydrogenase phosphatase regulatory subunit, mitochondrial | PDP1        |
| Not defined | sp    | Q8NCR9  | CLRN3_HUMAN  | Clarin-3                                                             | CLRN3       |
| Not defined | sp    | Q8NCU4  | CC191_HUMAN  | Coiled-coil domain-containing protein 191                            | CCDC191     |
| Not defined | sp    | Q8NCU8  | MTLN_HUMAN   | Mitoregulin                                                          | MTLN        |
| Not defined | sp    | Q8NCW5  | NNRE_HUMAN   | NAD(P)H-hydrate epimerase                                            | NAXE        |
| Not defined | sp    | Q8ND56  | LS14A_HUMAN  | Protein LSM14 homolog A                                              | LSM14A      |
| Not defined | sp    | Q8ND90  | PNMA1_HUMAN  | Paraneoplastic antigen Ma1                                           | PNMA1       |
| Not defined | sp    | Q8NDA2  | HMCN2_HUMAN  | Hemicentin-2                                                         | HMCN2       |
| Not defined | sp    | Q8NDD1  | CA131_HUMAN  | Uncharacterized protein C1orf131                                     | C1orf131    |
| Not defined | sp    | Q8NDG6  | TDRD9_HUMAN  | ATP-dependent RNA helicase TDRD9                                     | TDRD9       |
| Not defined | sp    | Q8NDH3  | PEPL1_HUMAN  | Probable aminopeptidase NPEPL1                                       | NPEPL1      |
| Not defined | sp    | Q8NDI1  | EHBP1_HUMAN  | EH domain-binding protein 1                                          | EHBP1       |
| Not defined | sp    | Q8NDL9  | CBPC5_HUMAN  | Cytosolic carboxypeptidase-like protein 5                            | AGL5        |
| Not defined | sp    | Q8NDP4  | ZN439_HUMAN  | Zinc finger protein 439                                              | ZNF439      |
| Not defined | sp    | Q8NDQ6  | ZN540_HUMAN  | Zinc finger protein 540                                              | ZNF540      |
| Not defined | sp    | Q8NDW4  | ZN248_HUMAN  | Zinc finger protein 248                                              | ZNF248      |
| Not defined | sp    | Q8NDY6  | BHE23_HUMAN  | Class E basic helix-loop-helix protein 23                            | BHLHE23     |
| Not defined | sp    | Q8NE09  | RG522_HUMAN  | Regulator of G-protein signaling 22                                  | RG522       |
| Not defined | sp    | Q8NE22  | SETD9_HUMAN  | SET domain-containing protein 9                                      | SETD9       |
| Not defined | sp    | Q8NE62  | CHDH_HUMAN   | Choline dehydrogenase, mitochondrial                                 | CHDH        |
| Not defined | sp    | Q8NE86  | MCU_HUMAN    | Calcium uniporter protein, mitochondrial                             | MCU         |
| Not defined | sp    | Q8NEF9  | SRFBP1_HUMAN | Serum response factor-binding protein 1                              | SRFBP1      |
| Not defined | sp    | Q8NEI9  | NGDN_HUMAN   | Neuroguidin                                                          | NGDN        |
| Not defined | sp    | Q8NET4  | RTL9_HUMAN   | Retrotransposon Gag-like protein 9                                   | RTL9        |
| Not defined | sp    | Q8NEV8  | EXPH5_HUMAN  | Exophilin-5                                                          | EXPH5       |
| Not defined | sp    | Q8NEY8  | PPhln1_HUMAN | Periphilin-1                                                         | PPhln1      |
| Not defined | sp    | Q8NEZ4  | KMT2C_HUMAN  | Histone-lysine N-methyltransferase 2C                                | KMT2C       |
| Not defined | sp    | Q8NEZ5  | FBX22_HUMAN  | F-box only protein 22                                                | FBXO22      |
| Not defined | sp    | Q8NF50  | DOCK8_HUMAN  | Dedicator of cytokinesis protein 8                                   | DOCK8       |
| Not defined | sp    | Q8NF67  | A2012_HUMAN  | Putative ankyrin repeat domain-containing protein 20A12 pseudogene   | ANKRD20A12P |
| Not defined | sp    | Q8NF91  | SYNE1_HUMAN  | Nesprin-1                                                            | SYNE1       |
| Not defined | sp    | Q8NFA0  | UBP32_HUMAN  | Ubiquitin carboxyl-terminal hydrolase 32                             | USP32       |
| Not defined | sp    | Q8NFC6  | BD1L1_HUMAN  | Biorientation of chromosomes in cell division protein 1-like 1       | BOD1L1      |
| Not defined | sp    | Q8NFF5  | FAD1_HUMAN   | FAD synthase                                                         | FLAD1       |
| Not defined | sp    | Q8NFF5  | NUP35_HUMAN  | Nucleoporin NUP35                                                    | NUP35       |
| Not defined | sp    | Q8NFF8  | REPS2_HUMAN  | RalBP1-associated Eps domain-containing protein 2                    | REPS2       |
| Not defined | sp    | Q8NFJ5  | RAI3_HUMAN   | Retinoic acid-induced protein 3                                      | GPCR5A      |
| Not defined | sp    | Q8NFF8  | BHE22_HUMAN  | Class E basic helix-loop-helix protein 22                            | BHLHE22     |
| Not defined | sp    | Q8NFP7  | NUD10_HUMAN  | Diphosphoinositol polyphosphate phosphohydrolase 3-alpha             | NUD10       |
| Not defined | sp    | Q8NFT6  | DBF4B_HUMAN  | Protein DBF4 homolog B                                               | DBF4B       |
| Not defined | sp    | Q8NFU0  | BEST4_HUMAN  | Bestrophin-4                                                         | BEST4       |
| Not defined | sp    | Q8NFU3  | TSTD1_HUMAN  | Thiosulfate:glutathione sulfurtransferase                            | TSTD1       |
| Not defined | sp    | Q8NFU7  | TET1_HUMAN   | Methylcytosine dioxygenase TET1                                      | TET1        |
| Not defined | sp    | Q8NFV4  | ABHD8_HUMAN  | Protein ABHD8                                                        | ABHD8       |
| Not defined | sp    | Q8NFV5  | SPDE1_HUMAN  | Speedy protein E1                                                    | SPDYE1      |
| Not defined | sp    | Q8NFW8  | NEUA_HUMAN   | N-acylneuraminate cytidylyltransferase                               | CMAS        |
| Not defined | sp    | Q8NFY9  | KBTB8_HUMAN  | Kelch repeat and BTB domain-containing protein 8                     | KBTBD8      |
| Not defined | sp    | Q8NFX4  | NLGN2_HUMAN  | Neuroigin-2                                                          | NLGN2       |
| Not defined | sp    | Q8NFZ8  | CADM4_HUMAN  | Cell adhesion molecule 4                                             | CADM4       |
| Not defined | sp    | Q8NGA1  | OR1M1_HUMAN  | Olfactory receptor 1M1                                               | OR1M1       |
| Not defined | sp    | Q8NGB8  | O4F15_HUMAN  | Olfactory receptor 4F15                                              | OR4F15      |
| Not defined | sp    | Q8NGF4  | O5AP2_HUMAN  | Olfactory receptor 5AP2                                              | OR5AP2      |
| Not defined | sp    | Q8NGK5  | O52M1_HUMAN  | Olfactory receptor 52M1                                              | OR52M1      |
| Not defined | sp    | Q8NGL7  | OR4P4_HUMAN  | Olfactory receptor 4P4                                               | OR4P4       |
| Not defined | sp    | Q8NGR4  | OR5C1_HUMAN  | Olfactory receptor 5C1                                               | OR5C1       |
| Not defined | sp    | Q8NGS7  | O13C8_HUMAN  | Olfactory receptor 13C8                                              | OR13C8      |
| Not defined | sp    | Q8NGX9  | OR6P1_HUMAN  | Olfactory receptor 6P1                                               | OR6P1       |
| Not defined | sp    | Q8NGZ9  | O2T10_HUMAN  | Olfactory receptor 2T10                                              | OR2T10      |
| Not defined | sp    | Q8NH69  | OR5W2_HUMAN  | Olfactory receptor 5W2                                               | OR5W2       |
| Not defined | sp    | Q8NHG7  | SVIP_HUMAN   | Small VCP/p97-interacting protein                                    | SVIP        |
| Not defined | sp    | Q8NHG8  | ZNRF2_HUMAN  | E3 ubiquitin-protein ligase ZNRF2                                    | ZNRF2       |
| Not defined | sp    | Q8NHH1  | TTL11_HUMAN  | Tubulin polyglutamylase TTL11                                        | TTL11       |
| Not defined | sp    | Q8NHP8  | PLBL2_HUMAN  | Putative phospholipase B-like 2                                      | PLBD2       |
| Not defined | sp    | Q8NH50  | DNAB8_HUMAN  | DnaJ homolog subfamily B member 8                                    | DNAB8       |
| Not defined | sp    | Q8NHY3  | GA2L2_HUMAN  | GAS2-like protein 2                                                  | GAS2L2      |

Supplementary Table 2.xlsx

| Cluster     | class | UNIPROT | UNIPROT_ID   | Description                                                                  | GN       |
|-------------|-------|---------|--------------|------------------------------------------------------------------------------|----------|
| Not defined | sp    | Q8NHZ8  | CDC26_HUMAN  | Anaphase-promoting complex subunit CDC26                                     | CDC26    |
| Not defined | sp    | Q8NI22  | MCFD2_HUMAN  | Multiple coagulation factor deficiency protein 2                             | MCFD2    |
| Not defined | sp    | Q8NI27  | THOC2_HUMAN  | THO complex subunit 2                                                        | THOC2    |
| Not defined | sp    | Q8NI36  | WDR36_HUMAN  | WD repeat-containing protein 36                                              | WDR36    |
| Not defined | sp    | Q8NI60  | COQ8A_HUMAN  | Atypical kinase COQ8A, mitochondrial                                         | COQ8A    |
| Not defined | sp    | Q8TAA9  | VANG1_HUMAN  | Vang-like protein 1                                                          | VANGL1   |
| Not defined | sp    | Q8TAF8  | LHPL5_HUMAN  | LHFPL tetraspan subfamily member 5 protein                                   | LHFP5    |
| Not defined | sp    | Q8TAG9  | EXOC6_HUMAN  | Exocyst complex component 6                                                  | EXOC6    |
| Not defined | sp    | Q8TAP9  | MPLK1_HUMAN  | M-phase-specific PLK1-interacting protein                                    | MPLK1P   |
| Not defined | sp    | Q8TAV4  | STML3_HUMAN  | Stomatin-like protein 3                                                      | STOML3   |
| Not defined | sp    | Q8TAX0  | OSR1_HUMAN   | Protein odd-skipped-related 1                                                | OSR1     |
| Not defined | sp    | Q8TB36  | GDAP1_HUMAN  | Ganglioside-induced differentiation-associated protein 1                     | GDAP1    |
| Not defined | sp    | Q8TB92  | HMGCL2_HUMAN | 3-hydroxy-3-methylglutaryl-CoA lyase, cytoplasmic                            | HMGCL1   |
| Not defined | sp    | Q8TB96  | TIP_HUMAN    | T-cell immunomodulatory protein                                              | ITFG1    |
| Not defined | sp    | Q8TBA6  | GOGA5_HUMAN  | Golgin subfamily A member 5                                                  | GOLGA5   |
| Not defined | sp    | Q8TBB0  | THAP6_HUMAN  | THAP domain-containing protein 6                                             | THAP6    |
| Not defined | sp    | Q8TBB5  | KLDC4_HUMAN  | Kelch domain-containing protein 4                                            | KLHDC4   |
| Not defined | sp    | Q8TBC4  | UBA3_HUMAN   | NEDD8-activating enzyme E1 catalytic subunit                                 | UBA3     |
| Not defined | sp    | Q8TBE9  | NANP_HUMAN   | N-acylneuraminate-9-phosphatase                                              | NANP     |
| Not defined | sp    | Q8TBF2  | PXL2B_HUMAN  | Prostamide/prostaglandin F synthase                                          | PRXL2B   |
| Not defined | sp    | Q8TBF8  | FA81A_HUMAN  | Protein FAM81A                                                               | FAM81A   |
| Not defined | sp    | Q8TBP5  | F174A_HUMAN  | Membrane protein FAM174A                                                     | FAM174A  |
| Not defined | sp    | Q8TB09  | KISHA_HUMAN  | Protein kish-A                                                               | TMEM167A |
| Not defined | sp    | Q8TBX8  | PI4K2C_HUMAN | Phosphatidylinositol 5-phosphate 4-kinase type-2 gamma                       | PIP4K2C  |
| Not defined | sp    | Q8TBY8  | PMFBP_HUMAN  | Polyamine-modulated factor 1-binding protein 1                               | PMFBP1   |
| Not defined | sp    | Q8TB25  | ZN502_HUMAN  | Zinc finger protein 502                                                      | ZNFS02   |
| Not defined | sp    | Q8TB26  | TM10A_HUMAN  | tRNA methyltransferase 10 homolog A                                          | TRMT10A  |
| Not defined | sp    | Q8TB28  | ZN564_HUMAN  | Zinc finger protein 564                                                      | ZNFS64   |
| Not defined | sp    | Q8TC12  | RDH11_HUMAN  | Retinol dehydrogenase 11                                                     | RDH11    |
| Not defined | sp    | Q8TC20  | CAGE1_HUMAN  | Cancer-associated gene 1 protein                                             | CAGE1    |
| Not defined | sp    | Q8TC56  | FA71B_HUMAN  | Protein FAM71B                                                               | FAM71B   |
| Not defined | sp    | Q8TC71  | MIEAP_HUMAN  | Mitochondria-eating protein                                                  | SPATA18  |
| Not defined | sp    | Q8TC99  | FNDC8_HUMAN  | Fibronectin type III domain-containing protein 8                             | FNDC8    |
| Not defined | sp    | Q8TCA0  | LRC20_HUMAN  | Leucine-rich repeat-containing protein 20                                    | LRRC20   |
| Not defined | sp    | Q8TCC3  | RM30_HUMAN   | 39S ribosomal protein L30, mitochondrial                                     | MRPL30   |
| Not defined | sp    | Q8TCD5  | NT5C_HUMAN   | 5'(3')-deoxyribonucleotidase, cytosolic type                                 | NT5C     |
| Not defined | sp    | Q8TCJ2  | STT3B_HUMAN  | Dolichyl-diphosphooligosaccharide--protein glycosyltransferase subunit STT3B | STT3B    |
| Not defined | sp    | Q8TCT8  | SPP2A_HUMAN  | Signal peptide peptidase-like 2A                                             | SPPL2A   |
| Not defined | sp    | Q8TCT9  | HM13_HUMAN   | Minor histocompatibility antigen H13                                         | HM13     |
| Not defined | sp    | Q8TC22  | C99L2_HUMAN  | CD99 antigen-like protein 2                                                  | CD99L2   |
| Not defined | sp    | Q8TD06  | AGR3_HUMAN   | Anterior gradient protein 3                                                  | AGR3     |
| Not defined | sp    | Q8TD08  | MK15_HUMAN   | Mitogen-activated protein kinase 15                                          | MAPK15   |
| Not defined | sp    | Q8TD16  | BICD2_HUMAN  | Protein bicaudal D homolog 2                                                 | BICD2    |
| Not defined | sp    | Q8TD30  | ALAT2_HUMAN  | Alanine aminotransferase 2                                                   | GPT2     |
| Not defined | sp    | Q8TD47  | RS4Y2_HUMAN  | 40S ribosomal protein S4, Y isoform 2                                        | RP54Y2   |
| Not defined | sp    | Q8TD57  | DYH3_HUMAN   | Dynein heavy chain 3, axonemal                                               | DNAH3    |
| Not defined | sp    | Q8TD91  | MAGC3_HUMAN  | Melanoma-associated antigen C3                                               | MAGEC3   |
| Not defined | sp    | Q8TDB6  | DTX3L_HUMAN  | E3 ubiquitin-protein ligase DTX3L                                            | DTX3L    |
| Not defined | sp    | Q8TDB8  | GTR14_HUMAN  | Solute carrier family 2, facilitated glucose transporter member 14           | SLC2A14  |
| Not defined | sp    | Q8TD10  | CHD5_HUMAN   | Chromodomain-helicase-DNA-binding protein 5                                  | CHD5     |
| Not defined | sp    | Q8TD16  | DMXL2_HUMAN  | DmX-like protein 2                                                           | DMXL2    |
| Not defined | sp    | Q8TDN6  | BRX1_HUMAN   | Ribosome biogenesis protein BRX1 homolog                                     | BRIX1    |
| Not defined | sp    | Q8TDP1  | RNH2C_HUMAN  | Ribonuclease H2 subunit C                                                    | RNASEH2C |
| Not defined | sp    | Q8TDR0  | MIP13_HUMAN  | TRAF3-interacting protein 1                                                  | TRAF3IP1 |
| Not defined | sp    | Q8TDS4  | HCAR2_HUMAN  | Hydroxycarboxylic acid receptor 2                                            | HCAR2    |
| Not defined | sp    | Q8TDX9  | PK1L1_HUMAN  | Polycystic kidney disease protein 1-like 1                                   | PKDL1L1  |
| Not defined | sp    | Q8TE59  | ATS19_HUMAN  | A disintegrin and metalloproteinase with thrombospondin motifs 19            | ADAMTS19 |
| Not defined | sp    | Q8TE76  | MORC4_HUMAN  | MORC family CW-type zinc finger protein 4                                    | MORC4    |
| Not defined | sp    | Q8TE77  | SSH3_HUMAN   | Protein phosphatase Slingshot homolog 3                                      | SSH3     |
| Not defined | sp    | Q8TE82  | S3TC1_HUMAN  | SH3 domain and tetratricopeptide repeat-containing protein 1                 | SH3TC1   |
| Not defined | sp    | Q8TED1  | GPX8_HUMAN   | Probable glutathione peroxidase 8                                            | GPX8     |
| Not defined | sp    | Q8TEM1  | PO210_HUMAN  | Nuclear pore membrane glycoprotein 210                                       | NUP210   |
| Not defined | sp    | Q8TEP8  | CE192_HUMAN  | Centrosomal protein of 192 kDa                                               | CEP192   |
| Not defined | sp    | Q8TEV8  | PAR3B_HUMAN  | Partitioning defective 3 homolog B                                           | PAR3B    |
| Not defined | sp    | Q8TEX9  | IPO4_HUMAN   | Importin-4                                                                   | IPO4     |
| Not defined | sp    | Q8TF01  | PNISR_HUMAN  | Arginine/serine-rich protein PNISR                                           | PNISR    |
| Not defined | sp    | Q8TF09  | DLRB2_HUMAN  | Dynein light chain roadblock-type 2                                          | DYNLRB2  |
| Not defined | sp    | Q8TF46  | DIS3L1_HUMAN | DIS3-like exonuclease 1                                                      | DIS3L1   |
| Not defined | sp    | Q8TF50  | ZN526_HUMAN  | Zinc finger protein 526                                                      | ZNFS26   |
| Not defined | sp    | Q8TF65  | GIPC2_HUMAN  | PDZ domain-containing protein GIPC2                                          | GIPC2    |
| Not defined | sp    | Q8TF68  | ZN384_HUMAN  | Zinc finger protein 384                                                      | ZNFS384  |
| Not defined | sp    | Q8WTS1  | ABHD5_HUMAN  | 1-acylglycerol-3-phosphate O-acyltransferase ABHD5                           | ABHD5    |
| Not defined | sp    | Q8WTS6  | SETD7_HUMAN  | Histone-lysine N-methyltransferase SETD7                                     | SETD7    |
| Not defined | sp    | Q8WU17  | RNF139_HUMAN | E3 ubiquitin-protein ligase RNF139                                           | RNF139   |
| Not defined | sp    | Q8WU79  | SMAP2_HUMAN  | Stromal membrane-associated protein 2                                        | SMAP2    |
| Not defined | sp    | Q8WUA8  | TSK_HUMAN    | Tsukushin                                                                    | TSKU     |
| Not defined | sp    | Q8WUH1  | CHURC_HUMAN  | Protein Churchill                                                            | CHURC1   |
| Not defined | sp    | Q8WUH2  | TGFA1_HUMAN  | Transforming growth factor-beta receptor-associated protein 1                | TGFBRAP1 |
| Not defined | sp    | Q8WU04  | PDC6I_HUMAN  | Programmed cell death 6-interacting protein                                  | PDC6IP   |
| Not defined | sp    | Q8WUN7  | UBTD2_HUMAN  | Ubiquitin domain-containing protein 2                                        | UBTD2    |
| Not defined | sp    | Q8WUP2  | FBL1M_HUMAN  | Filamin-binding LIM protein 1                                                | FBL1M1   |
| Not defined | sp    | Q8WUQ7  | CATIN_HUMAN  | Cactin                                                                       | CACTIN   |
| Not defined | sp    | Q8WUR7  | COO40_HUMAN  | UPF0235 protein C15orf40                                                     | C15orf40 |
| Not defined | sp    | Q8WUW1  | BRK1_HUMAN   | Protein BRICK1                                                               | BRK1     |
| Not defined | sp    | Q8WUX1  | S38A5_HUMAN  | Sodium-coupled neutral amino acid transporter 5                              | SLC38A5  |
| Not defined | sp    | Q8WUX2  | CHAC2_HUMAN  | Glutathione-specific gamma-glutamylcyclotransferase 2                        | CHAC2    |
| Not defined | sp    | Q8WUX9  | CHMP7_HUMAN  | Charged multivesicular body protein 7                                        | CHMP7    |
| Not defined | sp    | Q8WUY9  | DEP1B_HUMAN  | DEP domain-containing protein 1B                                             | DEPDC1B  |
| Not defined | sp    | Q8WUZ0  | BCL7C_HUMAN  | B-cell CLL/lymphoma 7 protein family member C                                | BCL7C    |
| Not defined | sp    | Q8WV07  | LTO1_HUMAN   | Protein LTO1 homolog                                                         | LTO1     |

Supplementary Table 2.xlsx

| Cluster     | class | UNIPROT | UNIPROT_ID   | Description                                                                | GN        |
|-------------|-------|---------|--------------|----------------------------------------------------------------------------|-----------|
| Not defined | sp    | Q8VV22  | NSE1_HUMAN   | Non-structural maintenance of chromosomes element 1 homolog                | NSMCE1    |
| Not defined | sp    | Q8VV24  | PHLA1_HUMAN  | Pleckstrin homology-like domain family A member 1                          | PHLDA1    |
| Not defined | sp    | Q8VV92  | MITD1_HUMAN  | MIT domain-containing protein 1                                            | MITD1     |
| Not defined | sp    | Q8WVB3  | HEXD_HUMAN   | Hexosaminidase D                                                           | HEXD      |
| Not defined | sp    | Q8WVCO  | LEO1_HUMAN   | RNA polymerase-associated protein LEO1                                     | LEO1      |
| Not defined | sp    | Q8WVF1  | OSCP1_HUMAN  | Protein OSCP1                                                              | OSCP1     |
| Not defined | sp    | Q8WVH0  | CPLX3_HUMAN  | Complexin-3                                                                | CPLX3     |
| Not defined | sp    | Q8WVJ2  | NUDC2_HUMAN  | NudC domain-containing protein 2                                           | NUDCD2    |
| Not defined | sp    | Q8WVK2  | SNR27_HUMAN  | U4/U6.U5 small nuclear ribonucleoprotein 27 kDa protein                    | SNRNP27   |
| Not defined | sp    | Q8WVQ1  | CANT1_HUMAN  | Soluble calcium-activated nucleotidase 1                                   | CANT1     |
| Not defined | sp    | Q8WVS4  | WDR60_HUMAN  | WD repeat-containing protein 60                                            | WDR60     |
| Not defined | sp    | Q8WVV5  | BT2A2_HUMAN  | Butyrophilin subfamily 2 member A2                                         | BTN2A2    |
| Not defined | sp    | Q8WVV9  | HNRLL_HUMAN  | Heterogeneous nuclear ribonucleoprotein L-like                             | HNRNPLL   |
| Not defined | sp    | Q8WVY7  | UBCP1_HUMAN  | Ubiquitin-like domain-containing CTD phosphatase 1                         | UBLCP1    |
| Not defined | sp    | Q8WVW01 | SEN15_HUMAN  | tRNA-splicing endonuclease subunit Sen15                                   | TSEN15    |
| Not defined | sp    | Q8WVW22 | DNAI4_HUMAN  | DnaI homolog subfamily A member 4                                          | DNAI4     |
| Not defined | sp    | Q8WVW24 | TEKT4_HUMAN  | Tektin-4                                                                   | TEKT4     |
| Not defined | sp    | Q8WVW33 | GTSF1_HUMAN  | Gametocyte-specific factor 1                                               | GTSF1     |
| Not defined | sp    | Q8WVW38 | FOG2_HUMAN   | Zinc finger protein ZFPM2                                                  | ZFPM2     |
| Not defined | sp    | Q8WVW52 | F151A_HUMAN  | Protein FAM151A                                                            | FAM151A   |
| Not defined | sp    | Q8WVWH5 | TRUB1_HUMAN  | Probable tRNA pseudouridine synthase 1                                     | TRUB1     |
| Not defined | sp    | Q8WVW11 | LMO7_HUMAN   | LIM domain only protein 7                                                  | LMO7      |
| Not defined | sp    | Q8WVW15 | CTL1_HUMAN   | Choline transporter-like protein 1                                         | SLC4A41   |
| Not defined | sp    | Q8WVW7  | ATX2L_HUMAN  | Ataxin-2-like protein                                                      | ATXN2L    |
| Not defined | sp    | Q8WVW9  | ICEF1_HUMAN  | Interactor protein for cytohesin exchange factors 1                        | IPCEF1    |
| Not defined | sp    | Q8WVWP7 | GIMAP1_HUMAN | GTPase IMAP family member 1                                                | GIMAP1    |
| Not defined | sp    | Q8WVWQ0 | PHIP_HUMAN   | PH-interacting protein                                                     | PHIP      |
| Not defined | sp    | Q8WVWV3 | RT4I1_HUMAN  | Reticulon-4-interacting protein 1, mitochondrial                           | RTN4IP1   |
| Not defined | sp    | Q8WVW6  | FCAMR_HUMAN  | High affinity immunoglobulin alpha and immunoglobulin mu Fc receptor       | FCAMR     |
| Not defined | sp    | Q8WVW8  | GAB3_HUMAN   | GRB2-associated-binding protein 3                                          | GAB3      |
| Not defined | sp    | Q8WVWX9 | SELM_HUMAN   | Selenoprotein M                                                            | SELENOM   |
| Not defined | sp    | Q8WVWY3 | PRP31_HUMAN  | U4/U6 small nuclear ribonucleoprotein Prp31                                | PRPF31    |
| Not defined | sp    | Q8WVWY7 | WFD12_HUMAN  | WAP four-disulfide core domain protein 12                                  | WFD12     |
| Not defined | sp    | Q8WVW24 | ABCAA_HUMAN  | ATP-binding cassette sub-family A member 10                                | ABCA10    |
| Not defined | sp    | Q8WVW28 | OIT3_HUMAN   | Oncoprotein-induced transcript 3 protein                                   | OIT3      |
| Not defined | sp    | Q8WVX93 | PALLD_HUMAN  | Palladin                                                                   | PALLD     |
| Not defined | sp    | Q8WVX94 | NALP7_HUMAN  | NACHT, LRR and PYD domains-containing protein 7                            | NLRP7     |
| Not defined | sp    | Q8WVXA9 | SREK1_HUMAN  | Splicing regulatory glutamine/lysine-rich protein 1                        | SREK1     |
| Not defined | sp    | Q8WXC3  | PYDC1_HUMAN  | Pyrin domain-containing protein 1                                          | PYDC1     |
| Not defined | sp    | Q8WXD5  | GEM16_HUMAN  | Gem-associated protein 6                                                   | GEM16     |
| Not defined | sp    | Q8WXE0  | CSK12_HUMAN  | Caskin-2                                                                   | CASKIN2   |
| Not defined | sp    | Q8WXF0  | SRS12_HUMAN  | Serine/arginine-rich splicing factor 12                                    | SRSF12    |
| Not defined | sp    | Q8WVG9  | AGRV1_HUMAN  | Adhesion G-protein coupled receptor V1                                     | ADGRV1    |
| Not defined | sp    | Q8WXH0  | SYNE2_HUMAN  | Nesprin-2                                                                  | SYNE2     |
| Not defined | sp    | Q8WXH5  | SOCS4_HUMAN  | Suppressor of cytokine signaling 4                                         | SOCS4     |
| Not defined | sp    | Q8WXI7  | MUC16_HUMAN  | Mucin-16                                                                   | MUC16     |
| Not defined | sp    | Q8WXI9  | P66B_HUMAN   | Transcriptional repressor p66-beta                                         | GATAD2B   |
| Not defined | sp    | Q8WVXU2 | DAAF4_HUMAN  | Dynein assembly factor 4, axonemal                                         | DNAAF4    |
| Not defined | sp    | Q8WVY54 | PPM1E_HUMAN  | Protein phosphatase 1E                                                     | PPM1E     |
| Not defined | sp    | Q8WVYA0 | IFT81_HUMAN  | Intraflagellar transport protein 81 homolog                                | IFT81     |
| Not defined | sp    | Q8WVYA6 | CTBL1_HUMAN  | Beta-catenin-like protein 1                                                | CTNNB1    |
| Not defined | sp    | Q8WVYQ5 | DGCR8_HUMAN  | Microprocessor complex subunit DGCR8                                       | DGCR8     |
| Not defined | sp    | Q8WZ42  | TITIN_HUMAN  | Titin                                                                      | TTN       |
| Not defined | sp    | Q8WZ64  | ARAP2_HUMAN  | Arf-GAP with Rho-GAP domain, ANK repeat and PH domain-containing protein 2 | ARAP2     |
| Not defined | sp    | Q8WZAO  | LZIC_HUMAN   | Protein LZIC                                                               | LZIC      |
| Not defined | sp    | Q8WZ9A  | IRGQ_HUMAN   | Immunity-related GTPase family Q protein                                   | IRGQ      |
| Not defined | sp    | Q8WZB0  | C1130_HUMAN  | Putative uncharacterized protein encoded by LINC00476                      | LINC00476 |
| Not defined | sp    | Q92466  | DDB2_HUMAN   | DNA damage-binding protein 2                                               | DDB2      |
| Not defined | sp    | Q92481  | AP2B_HUMAN   | Transcription factor AP-2-beta                                             | TFAP2B    |
| Not defined | sp    | Q92484  | ASM3A_HUMAN  | Acid sphingomyelinase-like phospholipase 3a                                | SMPDL3A   |
| Not defined | sp    | Q92502  | STAR8_HUMAN  | STAR-related lipid transfer protein 8                                      | STAR8     |
| Not defined | sp    | Q92506  | DH88_HUMAN   | Estradiol 17-beta-dehydrogenase 8                                          | HSD17B8   |
| Not defined | sp    | Q92508  | PIE21_HUMAN  | Piezo-type mechanosensitive ion channel component 1                        | PIEZO1    |
| Not defined | sp    | Q92520  | FAM3C_HUMAN  | Protein FAM3C                                                              | FAM3C     |
| Not defined | sp    | Q92526  | TCPW_HUMAN   | T-complex protein 1 subunit zeta-2                                         | CCT6B     |
| Not defined | sp    | Q92530  | PSMF1_HUMAN  | Proteasome inhibitor PI31 subunit                                          | PSMF1     |
| Not defined | sp    | Q92536  | YLAT2_HUMAN  | Y+L amino acid transporter 2                                               | SLC7A6    |
| Not defined | sp    | Q92541  | RTF1_HUMAN   | RNA polymerase-associated protein RTF1 homolog                             | RTF1      |
| Not defined | sp    | Q92545  | TM131_HUMAN  | Transmembrane protein 131                                                  | TMEM131   |
| Not defined | sp    | Q92552  | RT27_HUMAN   | 28S ribosomal protein S27, mitochondrial                                   | MRPS27    |
| Not defined | sp    | Q92572  | AP3S1_HUMAN  | AP-3 complex subunit sigma-1                                               | AP3S1     |
| Not defined | sp    | Q92575  | UBXN4_HUMAN  | UBX domain-containing protein 4                                            | UBXN4     |
| Not defined | sp    | Q92597  | NDRG1_HUMAN  | Protein NDRG1                                                              | NDRG1     |
| Not defined | sp    | Q92600  | CNOT9_HUMAN  | CCR4-NOT transcription complex subunit 9                                   | CNOT9     |
| Not defined | sp    | Q92610  | ZNF592_HUMAN | Zinc finger protein 592                                                    | ZNF592    |
| Not defined | sp    | Q92613  | JADE3_HUMAN  | Protein Jade-3                                                             | JADE3     |
| Not defined | sp    | Q92616  | GCN1_HUMAN   | eIF-2-alpha kinase activator GCN1                                          | GCN1      |
| Not defined | sp    | Q92618  | ZNF516_HUMAN | Zinc finger protein 516                                                    | ZNF516    |
| Not defined | sp    | Q92621  | NU205_HUMAN  | Nuclear pore complex protein Nup205                                        | NUP205    |
| Not defined | sp    | Q92667  | AKAP1_HUMAN  | A-kinase anchor protein 1, mitochondrial                                   | AKAP1     |
| Not defined | sp    | Q92686  | NEUG_HUMAN   | Neurogranin                                                                | NRGN      |
| Not defined | sp    | Q92696  | PGTA_HUMAN   | Geranylgeranyl transferase type-2 subunit alpha                            | RABGGTA   |
| Not defined | sp    | Q92738  | US6NL_HUMAN  | USP6 N-terminal-like protein                                               | USP6NL    |
| Not defined | sp    | Q92747  | ARC1A_HUMAN  | Actin-related protein 2/3 complex subunit 1A                               | ARPC1A    |
| Not defined | sp    | Q92769  | HDAC2_HUMAN  | Histone deacetylase 2                                                      | HDAC2     |
| Not defined | sp    | Q92783  | STAM1_HUMAN  | Signal transducing adapter molecule 1                                      | STAM      |
| Not defined | sp    | Q92785  | REQU_HUMAN   | Zinc finger protein ubi-d4                                                 | DPF2      |
| Not defined | sp    | Q92791  | SC65_HUMAN   | Endoplasmic reticulum protein SC65                                         | P3H4      |
| Not defined | sp    | Q92794  | KAT6A_HUMAN  | Histone acetyltransferase KAT6A                                            | KAT6A     |
| Not defined | sp    | Q92796  | DLG3_HUMAN   | Disks large homolog 3                                                      | DLG3      |

Supplementary Table 2.xlsx

| Cluster     | class | UNIPROT | UNIPROT_ID   | Description                                                                                   | GN       |
|-------------|-------|---------|--------------|-----------------------------------------------------------------------------------------------|----------|
| Not defined | sp    | Q92805  | GOGA1_HUMAN  | Golgin subfamily A member 1                                                                   | GOLGA1   |
| Not defined | sp    | Q92817  | EVPL_HUMAN   | Envelopin                                                                                     | EVPL     |
| Not defined | sp    | Q92834  | RPGR_HUMAN   | X-linked retinitis pigmentosa GTPase regulator                                                | RPGR     |
| Not defined | sp    | Q92859  | NEO1_HUMAN   | Neogenin                                                                                      | NEO1     |
| Not defined | sp    | Q92876  | KLK6_HUMAN   | Kallikrein-6                                                                                  | KLK6     |
| Not defined | sp    | Q92878  | RAD50_HUMAN  | DNA repair protein RAD50                                                                      | RAD50    |
| Not defined | sp    | Q92879  | CELF1_HUMAN  | CUGBP Elav-like family member 1                                                               | CELF1    |
| Not defined | sp    | Q92888  | ARHG1_HUMAN  | Rho guanine nucleotide exchange factor 1                                                      | ARHGEF1  |
| Not defined | sp    | Q92896  | GSLG1_HUMAN  | Golgi apparatus protein 1                                                                     | GLG1     |
| Not defined | sp    | Q92901  | RL3L_HUMAN   | 60S ribosomal protein L3-like                                                                 | RPL3L    |
| Not defined | sp    | Q92905  | CSN5_HUMAN   | COP9 signalosome complex subunit 5                                                            | COP55    |
| Not defined | sp    | Q92925  | SMRD2_HUMAN  | SWI/SNF-related matrix-associated actin-dependent regulator of chromatin subfamily D member 2 | SMARCD2  |
| Not defined | sp    | Q92934  | BAD_HUMAN    | Bcl2-associated agonist of cell death                                                         | BAD      |
| Not defined | sp    | Q92935  | EXTL1_HUMAN  | Exostosin-like 1                                                                              | EXTL1    |
| Not defined | sp    | Q92947  | GCDH_HUMAN   | Glutaryl-CoA dehydrogenase, mitochondrial                                                     | GCDH     |
| Not defined | sp    | Q92954  | PRG4_HUMAN   | Proteoglycan 4                                                                                | PRG4     |
| Not defined | sp    | Q92959  | SO2A1_HUMAN  | Solute carrier organic anion transporter family member 2A1                                    | SLC02A1  |
| Not defined | sp    | Q92973  | TNPO1_HUMAN  | Transportin-1                                                                                 | TNPO1    |
| Not defined | sp    | Q92982  | NINJ1_HUMAN  | Ninjurin-1                                                                                    | NINJ1    |
| Not defined | sp    | Q92995  | UBP13_HUMAN  | Ubiquitin carboxyl-terminal hydrolase 13                                                      | USP13    |
| Not defined | sp    | Q93008  | USP9X_HUMAN  | Probable ubiquitin carboxyl-terminal hydrolase FAF-X                                          | USP9X    |
| Not defined | sp    | Q93009  | UBP7_HUMAN   | Ubiquitin carboxyl-terminal hydrolase 7                                                       | USP7     |
| Not defined | sp    | Q93052  | LPP_HUMAN    | Lipoma-preferred partner                                                                      | LPP      |
| Not defined | sp    | Q93063  | EXT2_HUMAN   | Exostosin-2                                                                                   | EXT2     |
| Not defined | sp    | Q93070  | NAR4_HUMAN   | Ecto-ADP-ribosyltransferase 4                                                                 | ART4     |
| Not defined | sp    | Q93074  | MED12_HUMAN  | Mediator of RNA polymerase II transcription subunit 12                                        | MED12    |
| Not defined | sp    | Q93075  | TATD2_HUMAN  | Putative deoxyribonuclease TATDN2                                                             | TATDN2   |
| Not defined | sp    | Q93084  | AT2A3_HUMAN  | Sarcoplasmic/endoplasmic reticulum calcium ATPase 3                                           | ATP2A3   |
| Not defined | sp    | Q93096  | TP4A1_HUMAN  | Protein tyrosine phosphatase type IVA 1                                                       | PTP4A1   |
| Not defined | sp    | Q93097  | WNT2B_HUMAN  | Protein Wnt-2b                                                                                | WNT2B    |
| Not defined | sp    | Q93099  | HGD_HUMAN    | Homogentisate 1,2-dioxygenase                                                                 | HGD      |
| Not defined | sp    | Q93100  | KPBB_HUMAN   | Phosphorylase b kinase regulatory subunit beta                                                | PKHB     |
| Not defined | sp    | Q969E4  | TCAL3_HUMAN  | Transcription elongation factor A protein-like 3                                              | TCEAL3   |
| Not defined | sp    | Q969E8  | TSR2_HUMAN   | Pre-rRNA-processing protein TSR2 homolog                                                      | TSR2     |
| Not defined | sp    | Q969G6  | RIFK_HUMAN   | Riboflavin kinase                                                                             | RFK      |
| Not defined | sp    | Q969J3  | BORCS5_HUMAN | BLOC-1-related complex subunit 5                                                              | BORCS5   |
| Not defined | sp    | Q969L2  | MAL2_HUMAN   | Protein MAL2                                                                                  | MAL2     |
| Not defined | sp    | Q969M2  | CXA10_HUMAN  | Gap junction alpha-10 protein                                                                 | GJA10    |
| Not defined | sp    | Q969N2  | PIGT_HUMAN   | GPI transamidase component PIG-T                                                              | PIGT     |
| Not defined | sp    | Q969P0  | IGSF8_HUMAN  | Immunoglobulin superfamily member 8                                                           | IGSF8    |
| Not defined | sp    | Q969P6  | TOP1M_HUMAN  | DNA topoisomerase I, mitochondrial                                                            | TOP1MT   |
| Not defined | sp    | Q969Q0  | RL36L_HUMAN  | 60S ribosomal protein L36a-like                                                               | RPL36AL  |
| Not defined | sp    | Q969Q5  | RAB24_HUMAN  | Ras-related protein Rab-24                                                                    | RAB24    |
| Not defined | sp    | Q969R2  | OSBP2_HUMAN  | Oxysterol-binding protein 2                                                                   | OSBP2    |
| Not defined | sp    | Q969S9  | RRF2M_HUMAN  | Ribosome-releasing factor 2, mitochondrial                                                    | RFM2     |
| Not defined | sp    | Q969T4  | UB2E3_HUMAN  | Ubiquitin-conjugating enzyme E2 E3                                                            | UBE2E3   |
| Not defined | sp    | Q969T9  | WBP2_HUMAN   | WW domain-binding protein 2                                                                   | WBP2     |
| Not defined | sp    | Q969U7  | PSMG2_HUMAN  | Proteasome assembly chaperone 2                                                               | PSMG2    |
| Not defined | sp    | Q969V4  | TEKT1_HUMAN  | Tektin-1                                                                                      | TEKT1    |
| Not defined | sp    | Q969X0  | RILP2_HUMAN  | RILP-like protein 2                                                                           | RILP2    |
| Not defined | sp    | Q969X1  | LFG3_HUMAN   | Protein lifeguard 3                                                                           | TMBIM1   |
| Not defined | sp    | Q969Y2  | GTPB3_HUMAN  | tRNA modification GTPase GTPBP3, mitochondrial                                                | GTPBP3   |
| Not defined | sp    | Q969Z3  | MARC2_HUMAN  | Mitochondrial amidoxime reducing component 2                                                  | MTARC2   |
| Not defined | sp    | Q96A00  | PP14A_HUMAN  | Protein phosphatase 1 regulatory subunit 14A                                                  | PPP1R14A |
| Not defined | sp    | Q96A05  | VATE2_HUMAN  | V-type proton ATPase subunit E 2                                                              | ATP6V1E2 |
| Not defined | sp    | Q96A23  | CPNE4_HUMAN  | Copine-4                                                                                      | CPNE4    |
| Not defined | sp    | Q96A33  | CCD47_HUMAN  | Coiled-coil domain-containing protein 47                                                      | CCD47    |
| Not defined | sp    | Q96A35  | RM24_HUMAN   | 39S ribosomal protein L24, mitochondrial                                                      | MRL24    |
| Not defined | sp    | Q96A57  | TM230_HUMAN  | Transmembrane protein 230                                                                     | TMEM230  |
| Not defined | sp    | Q96A65  | EXOC4_HUMAN  | Exocyst complex component 4                                                                   | EXOC4    |
| Not defined | sp    | Q96A73  | P33MX_HUMAN  | Putative monoxygenase p33MONOX                                                                | KIAA1191 |
| Not defined | sp    | Q96A84  | EMID1_HUMAN  | EMI domain-containing protein 1                                                               | EMID1    |
| Not defined | sp    | Q96A86  | NTAN1_HUMAN  | Protein N-terminal asparagine amidohydrolase                                                  | NTAN1    |
| Not defined | sp    | Q96A7   | TTC17_HUMAN  | Tetratricopeptide repeat protein 17                                                           | TTC17    |
| Not defined | sp    | Q96AJ9  | VTI1A_HUMAN  | Vesicle transport through interaction with t-SNAREs homolog 1A                                | VTI1A    |
| Not defined | sp    | Q96AP4  | ZUP1_HUMAN   | Zinc finger-containing ubiquitin peptidase 1                                                  | ZUP1     |
| Not defined | sp    | Q96AQ6  | PBIP1_HUMAN  | Pre-B-cell leukemia transcription factor-interacting protein 1                                | PBXIP1   |
| Not defined | sp    | Q96AQ8  | MCUR1_HUMAN  | Mitochondrial calcium uniporter regulator 1                                                   | MCUR1    |
| Not defined | sp    | Q96AT1  | K1143_HUMAN  | Uncharacterized protein KIAA1143                                                              | KIAA1143 |
| Not defined | sp    | Q96AT9  | RPE_HUMAN    | Ribulose-phosphate 3-epimerase                                                                | RPE      |
| Not defined | sp    | Q96AY3  | FKB10_HUMAN  | Peptidyl-prolyl cis-trans isomerase FKBP10                                                    | FKBP10   |
| Not defined | sp    | Q96AY4  | TTC28_HUMAN  | Tetratricopeptide repeat protein 28                                                           | TTC28    |
| Not defined | sp    | Q96AZ6  | ISG20_HUMAN  | Interferon-stimulated gene 20 kDa protein                                                     | ISG20    |
| Not defined | sp    | Q96B26  | EXOSC8_HUMAN | Exosome complex component RRP43                                                               | EXOSC8   |
| Not defined | sp    | Q96B36  | AKT51_HUMAN  | Proline-rich AKT1 substrate 1                                                                 | AKT51    |
| Not defined | sp    | Q96B45  | BORCS7_HUMAN | BLOC-1-related complex subunit 7                                                              | BORCS7   |
| Not defined | sp    | Q96B49  | TOM6_HUMAN   | Mitochondrial import receptor subunit TOM6 homolog                                            | TOMM6    |
| Not defined | sp    | Q96B97  | SH3K1_HUMAN  | SH3 domain-containing kinase-binding protein 1                                                | SH3KBP1  |
| Not defined | sp    | Q96BD5  | PF21A_HUMAN  | PHD finger protein 21A                                                                        | PHF21A   |
| Not defined | sp    | Q96BF3  | TMIG2_HUMAN  | Transmembrane and immunoglobulin domain-containing protein 2                                  | TMIG2    |
| Not defined | sp    | Q96BJ3  | AIDA_HUMAN   | Axin interactor, dorsalization-associated protein                                             | AIDA     |
| Not defined | sp    | Q96BP2  | CHCH1_HUMAN  | Coiled-coil-helix-coiled-coil-helix domain-containing protein 1                               | CHCHD1   |
| Not defined | sp    | Q96BP3  | PPWD1_HUMAN  | Peptidylprolyl isomerase domain and WD repeat-containing protein 1                            | PPWD1    |
| Not defined | sp    | Q96BT3  | CENPT_HUMAN  | Centromere protein T                                                                          | CENPT    |
| Not defined | sp    | Q96BW5  | PTER_HUMAN   | Phosphotriesterase-related protein                                                            | PTER     |
| Not defined | sp    | Q96BY6  | DOCK10_HUMAN | Dedicator of cytokinesis protein 10                                                           | DOCK10   |
| Not defined | sp    | Q96BZ8  | LENG1_HUMAN  | Leukocyte receptor cluster member 1                                                           | LENG1    |
| Not defined | sp    | Q96C23  | GALM_HUMAN   | Aldose 1-epimerase                                                                            | GALM     |
| Not defined | sp    | Q96C34  | RUND1_HUMAN  | RUN domain-containing protein 1                                                               | RUND1    |
| Not defined | sp    | Q96C36  | P5CR2_HUMAN  | Pyrroline-5-carboxylate reductase 2                                                           | PYCR2    |

Supplementary Table 2.xlsx

| Cluster     | class | UNIPROT | UNIPROT_ID   | Description                                                                                   | GN         |
|-------------|-------|---------|--------------|-----------------------------------------------------------------------------------------------|------------|
| Not defined | sp    | Q96CS7  | CSTOS_HUMAN  | Protein CUSTOS                                                                                | CUSTOS     |
| Not defined | sp    | Q96C90  | PP14B_HUMAN  | Protein phosphatase 1 regulatory subunit 14B                                                  | PPP1R14B   |
| Not defined | sp    | Q96CF2  | CHM4C_HUMAN  | Charged multivesicular body protein 4c                                                        | CHMP4C     |
| Not defined | sp    | Q96CG8  | CTHR1_HUMAN  | Collagen triple helix repeat-containing protein 1                                             | CTHRC1     |
| Not defined | sp    | Q96CM8  | ACSF2_HUMAN  | Medium-chain acyl-CoA ligase ACSF2, mitochondrial                                             | ACSF2      |
| Not defined | sp    | Q96CN4  | EVI5L_HUMAN  | EVI5-like protein                                                                             | EVI5L      |
| Not defined | sp    | Q96CN9  | GCC1_HUMAN   | GRIP and coiled-coil domain-containing protein 1                                              | GCC1       |
| Not defined | sp    | Q96CP2  | FWCH2_HUMAN  | FLYWCH family member 2                                                                        | FLYWCH2    |
| Not defined | sp    | Q96CP6  | ASTRA_HUMAN  | Protein Aster-A                                                                               | GRAMD1A    |
| Not defined | sp    | Q96CQ1  | S2536_HUMAN  | Solute carrier family 25 member 36                                                            | SLC25A36   |
| Not defined | sp    | Q96CS2  | HAUS1_HUMAN  | HAUS augmin-like complex subunit 1                                                            | HAUS1      |
| Not defined | sp    | Q96CS3  | FAF2_HUMAN   | FAS-associated factor 2                                                                       | FAF2       |
| Not defined | sp    | Q96CU9  | FXRD1_HUMAN  | FAD-dependent oxidoreductase domain-containing protein 1                                      | FOXRED1    |
| Not defined | sp    | Q96CW1  | AP2M1_HUMAN  | AP-2 complex subunit mu                                                                       | AP2M1      |
| Not defined | sp    | Q96CX2  | KCD12_HUMAN  | BTB/POZ domain-containing protein KCTD12                                                      | KCTD12     |
| Not defined | sp    | Q96D05  | F241B_HUMAN  | Protein FAM241B                                                                               | FAM241B    |
| Not defined | sp    | Q96D15  | RCN3_HUMAN   | Reticulocalbin-3                                                                              | RCN3       |
| Not defined | sp    | Q96D31  | CRCM1_HUMAN  | Calcium release-activated calcium channel protein 1                                           | ORA1       |
| Not defined | sp    | Q96D71  | REPS1_HUMAN  | RalBP1-associated Eps domain-containing protein 1                                             | REPS1      |
| Not defined | sp    | Q96DE0  | NUD16_HUMAN  | U8 snoRNA-decapping enzyme                                                                    | NUDT16     |
| Not defined | sp    | Q96DI7  | SNR40_HUMAN  | U5 small nuclear ribonucleoprotein 40 kDa protein                                             | SNRNP40    |
| Not defined | sp    | Q96DN5  | TBC31_HUMAN  | TBC1 domain family member 31                                                                  | TBC1D31    |
| Not defined | sp    | Q96DT5  | DYH11_HUMAN  | Dynein heavy chain 11, axonemal                                                               | DNAH11     |
| Not defined | sp    | Q96DX5  | ASB9_HUMAN   | Ankyrin repeat and SOCS box protein 9                                                         | ASB9       |
| Not defined | sp    | Q96DZ1  | ERLEC_HUMAN  | Endoplasmic reticulum lectin 1                                                                | ERLEC1     |
| Not defined | sp    | Q96DZ5  | CLIP3_HUMAN  | CAP-Gly domain-containing linker protein 3                                                    | CLIP3      |
| Not defined | sp    | Q96E22  | NGBR_HUMAN   | Dehydrodolichyl diphosphate synthase complex subunit NUS1                                     | NUS1       |
| Not defined | sp    | Q96E39  | RMXL1_HUMAN  | RNA binding motif protein, X-linked-like-1                                                    | RBMXL1     |
| Not defined | sp    | Q96E52  | OMA1_HUMAN   | Metalloendopeptidase OMA1, mitochondrial                                                      | OMA1       |
| Not defined | sp    | Q96EC8  | YIPF6_HUMAN  | Protein YIPF6                                                                                 | YIPF6      |
| Not defined | sp    | Q96ED9  | HOOK2_HUMAN  | Protein Hook homolog 2                                                                        | HOOK2      |
| Not defined | sp    | Q96EH3  | MASU1_HUMAN  | Mitochondrial assembly of ribosomal large subunit protein 1                                   | MALSU1     |
| Not defined | sp    | Q96EI5  | TCAL4_HUMAN  | Transcription elongation factor A protein-like 4                                              | TCEAL4     |
| Not defined | sp    | Q96EK5  | KBP_HUMAN    | KIF-binding protein                                                                           | KIFBP      |
| Not defined | sp    | Q96EL2  | RT24_HUMAN   | 28S ribosomal protein S24, mitochondrial                                                      | MRPS24     |
| Not defined | sp    | Q96EN8  | MOCOS_HUMAN  | Molybdenum cofactor sulfurase                                                                 | MOCOS      |
| Not defined | sp    | Q96EQ0  | SGTB_HUMAN   | Small glutamine-rich tetratricopeptide repeat-containing protein beta                         | SGTB       |
| Not defined | sp    | Q96ER9  | MITOK_HUMAN  | Mitochondrial potassium channel                                                               | CCDC51     |
| Not defined | sp    | Q96E57  | SGF29_HUMAN  | SAGA-associated factor 29                                                                     | SGF29      |
| Not defined | sp    | Q96EU6  | RRP36_HUMAN  | Ribosomal RNA processing protein 36 homolog                                                   | RRP36      |
| Not defined | sp    | Q96EX1  | SIM12_HUMAN  | Small integral membrane protein 12                                                            | SMIM12     |
| Not defined | sp    | Q96EY1  | DNAI3_HUMAN  | DnaJ homolog subfamily A member 3, mitochondrial                                              | DNAI3      |
| Not defined | sp    | Q96EY4  | TMA16_HUMAN  | Translation machinery-associated protein 16                                                   | TMA16      |
| Not defined | sp    | Q96EY5  | MB12A_HUMAN  | Multivesicular body subunit 12A                                                               | MVB12A     |
| Not defined | sp    | Q96EY7  | PTCD3_HUMAN  | Pentatricopeptide repeat domain-containing protein 3, mitochondrial                           | PTCD3      |
| Not defined | sp    | Q96EY8  | MMAB_HUMAN   | Corrinoid adenosyltransferase                                                                 | MMAB       |
| Not defined | sp    | Q96F07  | CYFP2_HUMAN  | Cytoplasmic FMR1-interacting protein 2                                                        | CYFP2      |
| Not defined | sp    | Q96F63  | CCD97_HUMAN  | Coiled-coil domain-containing protein 97                                                      | CCDC97     |
| Not defined | sp    | Q96FH0  | BORCS8_HUMAN | BLOC-1-related complex subunit 8                                                              | BORCS8     |
| Not defined | sp    | Q96FJ2  | DYL2_HUMAN   | Dynein light chain 2, cytoplasmic                                                             | DYNLL2     |
| Not defined | sp    | Q96FL9  | GLT14_HUMAN  | Polypeptide N-acetylgalactosaminyltransferase 14                                              | GALNT14    |
| Not defined | sp    | Q96FN4  | CPNE2_HUMAN  | Copine-2                                                                                      | CPNE2      |
| Not defined | sp    | Q96FN9  | DTD2_HUMAN   | D-aminoacyl-tRNA deacylase 2                                                                  | DTD2       |
| Not defined | sp    | Q96FQ6  | S10AG_HUMAN  | Protein S100-A16                                                                              | S100A16    |
| Not defined | sp    | Q96FS4  | SIPA1_HUMAN  | Signal-induced proliferation-associated protein 1                                             | SIPA1      |
| Not defined | sp    | Q96FV2  | SCRN2_HUMAN  | Secernin-2                                                                                    | SCRN2      |
| Not defined | sp    | Q96FV9  | THOC1_HUMAN  | THO complex subunit 1                                                                         | THOC1      |
| Not defined | sp    | Q96FW1  | OTUB1_HUMAN  | Ubiquitin thioesterase OTUB1                                                                  | OTUB1      |
| Not defined | sp    | Q96FX8  | PERP_HUMAN   | p53 apoptosis effector related to PMP-22                                                      | PERP       |
| Not defined | sp    | Q96FZ2  | HMCES_HUMAN  | Abasic site processing protein HMCES                                                          | HMCES      |
| Not defined | sp    | Q96FZ7  | CHMP6_HUMAN  | Charged multivesicular body protein 6                                                         | CHMP6      |
| Not defined | sp    | Q96G01  | BICD1_HUMAN  | Protein bicaudal D homolog 1                                                                  | BICD1      |
| Not defined | sp    | Q96G03  | PGM2_HUMAN   | Phosphoglucomutase-2                                                                          | PGM2       |
| Not defined | sp    | Q96G23  | CERS2_HUMAN  | Ceramide synthase 2                                                                           | CERS2      |
| Not defined | sp    | Q96G25  | MED8_HUMAN   | Mediator of RNA polymerase II transcription subunit 8                                         | MED8       |
| Not defined | sp    | Q96G28  | CFA36_HUMAN  | Cilia- and flagella-associated protein 36                                                     | CFAP36     |
| Not defined | sp    | Q96G61  | NUD11_HUMAN  | Diphosphoinositol polyphosphate phosphohydrolase 3-beta                                       | NUDT11     |
| Not defined | sp    | Q96G75  | RMD5B_HUMAN  | E3 ubiquitin-protein transferase RMD5B                                                        | RMD5B      |
| Not defined | sp    | Q96GA3  | LTV1_HUMAN   | Protein LTV1 homolog                                                                          | LTV1       |
| Not defined | sp    | Q96GA7  | SDSL_HUMAN   | Serine dehydratase-like                                                                       | SDSL       |
| Not defined | sp    | Q96GE4  | CEP95_HUMAN  | Centrosomal protein of 95 kDa                                                                 | CEP95      |
| Not defined | sp    | Q96GG9  | DCN11_HUMAN  | DCN1-like protein 1                                                                           | DCUN1D1    |
| Not defined | sp    | Q96GK7  | FAH2A_HUMAN  | Fumarylacetoacetate hydrolase domain-containing protein 2A                                    | FAHD2A     |
| Not defined | sp    | Q96GM5  | SMRD1_HUMAN  | SWI/SNF-related matrix-associated actin-dependent regulator of chromatin subfamily D member 1 | SMARCD1    |
| Not defined | sp    | Q96GQ7  | DDX27_HUMAN  | Probable ATP-dependent RNA helicase DDX27                                                     | DDX27      |
| Not defined | sp    | Q96GW9  | SYMM_HUMAN   | Methionine-tRNA ligase, mitochondrial                                                         | MARS2      |
| Not defined | sp    | Q96GX9  | MTNB_HUMAN   | Methylthioribulose-1-phosphate dehydratase                                                    | APIP       |
| Not defined | sp    | Q96H20  | SNF8_HUMAN   | Vacuolar-sorting protein SNF8                                                                 | SNF8       |
| Not defined | sp    | Q96H78  | S2544_HUMAN  | Solute carrier family 25 member 44                                                            | SLC25A44   |
| Not defined | sp    | Q96HD1  | CREL1_HUMAN  | Protein disulfide isomerase CREL1                                                             | CREL1      |
| Not defined | sp    | Q96HJ3  | CCD34_HUMAN  | Coiled-coil domain-containing protein 34                                                      | CCDC34     |
| Not defined | sp    | Q96HM7  | PED1B_HUMAN  | PC-esterase domain-containing protein 1B                                                      | PCED1B     |
| Not defined | sp    | Q96HP0  | DOCK6_HUMAN  | Dedicator of cytokinesis protein 6                                                            | DOCK6      |
| Not defined | sp    | Q96HQ0  | ZNF419_HUMAN | Zinc finger protein 419                                                                       | ZNF419     |
| Not defined | sp    | Q96HQ2  | CZAIL_HUMAN  | CDKN2AIP N-terminal-like protein                                                              | CDKN2AIPNL |
| Not defined | sp    | Q96HR3  | MED30_HUMAN  | Mediator of RNA polymerase II transcription subunit 30                                        | MED30      |
| Not defined | sp    | Q96HR8  | NAF1_HUMAN   | H/ACA ribonucleoprotein complex non-core subunit NAF1                                         | NAF1       |
| Not defined | sp    | Q96HR9  | REEP6_HUMAN  | Receptor expression-enhancing protein 6                                                       | REEP6      |
| Not defined | sp    | Q96HS1  | PGAM5_HUMAN  | Serine/threonine-protein phosphatase PGAM5, mitochondrial                                     | PGAM5      |
| Not defined | sp    | Q96HY7  | DHTK1_HUMAN  | Probable 2-oxoglutarate dehydrogenase E1 component DHKTD1, mitochondrial                      | DHTKD1     |

Supplementary Table 2.xlsx

| Cluster     | class | UNIPROT | UNIPROT_ID   | Description                                                                | GN        |
|-------------|-------|---------|--------------|----------------------------------------------------------------------------|-----------|
| Not defined | sp    | Q96115  | SCLY_HUMAN   | Selenocysteine lyase                                                       | SCLY      |
| Not defined | sp    | Q96123  | PREY_HUMAN   | Protein preY, mitochondrial                                                | PYURF     |
| Not defined | sp    | Q96125  | SPF45_HUMAN  | Splicing factor 45                                                         | RBM17     |
| Not defined | sp    | Q96136  | COX14_HUMAN  | Cytochrome c oxidase assembly protein COX14                                | COX14     |
| Not defined | sp    | Q96159  | SYNM_HUMAN   | Probable asparagine-tRNA ligase, mitochondrial                             | NARS2     |
| Not defined | sp    | Q961F1  | AJUBA_HUMAN  | LIM domain-containing protein ajuba                                        | AJUBA     |
| Not defined | sp    | Q961J6  | GMPPA_HUMAN  | Mannose-1-phosphate guanyltransferase alpha                                | GMPPA     |
| Not defined | sp    | Q961K1  | BOD1_HUMAN   | Biorientation of chromosomes in cell division protein 1                    | BOD1      |
| Not defined | sp    | Q961M9  | DYDC2_HUMAN  | DPY30 domain-containing protein 2                                          | DYDC2     |
| Not defined | sp    | Q961R7  | HPDL_HUMAN   | 4-hydroxyphenylpyruvate dioxygenase-like protein                           | HPDL      |
| Not defined | sp    | Q961U4  | ABHEB_HUMAN  | Protein ABHD14B                                                            | ABHD14B   |
| Not defined | sp    | Q961V0  | NGLY1_HUMAN  | Peptide-N(4)-(N-acetyl-beta-glucosaminy)asparagine amidase                 | NGLY1     |
| Not defined | sp    | Q961Y1  | NSL1_HUMAN   | Kinetochore-associated protein NSL1 homolog                                | NSL1      |
| Not defined | sp    | Q961Y4  | CBPB2_HUMAN  | Carboxypeptidase B2                                                        | CPB2      |
| Not defined | sp    | Q961Z7  | RSRC1_HUMAN  | Serine/Arginine-related protein 53                                         | RSRC1     |
| Not defined | sp    | Q96J01  | THOC3_HUMAN  | THO complex subunit 3                                                      | THOC3     |
| Not defined | sp    | Q96J02  | ITCH_HUMAN   | E3 ubiquitin-protein ligase Itchy homolog                                  | ITCH      |
| Not defined | sp    | Q96J65  | MRP9_HUMAN   | Multidrug resistance-associated protein 9                                  | ABCC12    |
| Not defined | sp    | Q96J92  | WNK4_HUMAN   | Serine/threonine-protein kinase WNK4                                       | WNK4      |
| Not defined | sp    | Q96J94  | PIWL1_HUMAN  | Piwi-like protein 1                                                        | PIWL1     |
| Not defined | sp    | Q96JB1  | DYH8_HUMAN   | Dynein heavy chain 8, axonemal                                             | DNAH8     |
| Not defined | sp    | Q96JB5  | CK5P3_HUMAN  | CDK5 regulatory subunit-associated protein 3                               | CKKSRAP3  |
| Not defined | sp    | Q96JB8  | MPP4_HUMAN   | MAGUK p55 subfamily member 4                                               | MPP4      |
| Not defined | sp    | Q96JC4  | ZN479_HUMAN  | Zinc finger protein 479                                                    | ZNF479    |
| Not defined | sp    | Q96JG6  | VP550_HUMAN  | Syndetin                                                                   | VP550     |
| Not defined | sp    | Q96J17  | SPTCS_HUMAN  | Spatacsin                                                                  | SPG11     |
| Not defined | sp    | Q96JJ6  | JPH4_HUMAN   | Junctophilin-4                                                             | JPH4      |
| Not defined | sp    | Q96JJ7  | TMX3_HUMAN   | Protein disulfide-isomerase TMX3                                           | TMX3      |
| Not defined | sp    | Q96JM2  | ZN462_HUMAN  | Zinc finger protein 462                                                    | ZNF462    |
| Not defined | sp    | Q96JN2  | CC136_HUMAN  | Coiled-coil domain-containing protein 136                                  | CCDC136   |
| Not defined | sp    | Q96JP5  | ZFP91_HUMAN  | E3 ubiquitin-protein ligase ZFP91                                          | ZFP91     |
| Not defined | sp    | Q96JQ0  | PCD16_HUMAN  | Protocadherin-16                                                           | DCHS1     |
| Not defined | sp    | Q96JY6  | PDLI2_HUMAN  | PDZ and LIM domain protein 2                                               | POLIM2    |
| Not defined | sp    | Q96K21  | ANCHR_HUMAN  | Abscission/NoCut checkpoint regulator                                      | ZFYVE19   |
| Not defined | sp    | Q96KAS  | CLP1L_HUMAN  | Cleft lip and palate transmembrane protein 1-like protein                  | CLPTM1L   |
| Not defined | sp    | Q96KB5  | TOPK_HUMAN   | Lymphokine-activated killer T-cell-originated protein kinase               | PBK       |
| Not defined | sp    | Q96KF7  | SMIM8_HUMAN  | Small integral membrane protein 8                                          | SMIM8     |
| Not defined | sp    | Q96KP6  | TNIP3_HUMAN  | TNFAIP3-interacting protein 3                                              | TNIP3     |
| Not defined | sp    | Q96KR1  | ZFR_HUMAN    | Zinc finger RNA-binding protein                                            | ZFR       |
| Not defined | sp    | Q96L14  | C170L_HUMAN  | Cep170-like protein                                                        | CEP170P1  |
| Not defined | sp    | Q96L21  | RL10L_HUMAN  | 60S ribosomal protein L10-like                                             | RPL10L    |
| Not defined | sp    | Q96L91  | EP400_HUMAN  | E1A-binding protein p400                                                   | EP400     |
| Not defined | sp    | Q96L93  | KI16B_HUMAN  | Kinesin-like protein KIF16B                                                | KIF16B    |
| Not defined | sp    | Q96L96  | ALPK3_HUMAN  | Alpha-protein kinase 3                                                     | ALPK3     |
| Not defined | sp    | Q96LA8  | ANM6_HUMAN   | Protein arginine N-methyltransferase 6                                     | PRMT6     |
| Not defined | sp    | Q96LB1  | MRGX2_HUMAN  | Mas-related G-protein coupled receptor member X2                           | MRGPRX2   |
| Not defined | sp    | Q96LB3  | IFT74_HUMAN  | Intraflagellar transport protein 74 homolog                                | IFT74     |
| Not defined | sp    | Q96LM5  | CDO45_HUMAN  | Uncharacterized protein C4orf45                                            | C4orf45   |
| Not defined | sp    | Q96LR5  | UBE2E_HUMAN  | Ubiquitin-conjugating enzyme E2 E2                                         | UBE2E2    |
| Not defined | sp    | Q96LW4  | PRIPO_HUMAN  | DNA-directed primase/polymerase protein                                    | PRIMPOL   |
| Not defined | sp    | Q96LZ2  | MAGBA_HUMAN  | Melanoma-associated antigen B10                                            | MAGEB10   |
| Not defined | sp    | Q96M27  | PRRC1_HUMAN  | Protein PRRC1                                                              | PRRC1     |
| Not defined | sp    | Q96M42  | CU129_HUMAN  | Putative uncharacterized protein encoded by LINC00479                      | LINC00479 |
| Not defined | sp    | Q96M61  | MAGB1_HUMAN  | Melanoma-associated antigen B18                                            | MAGEB18   |
| Not defined | sp    | Q96M86  | DNHD1_HUMAN  | Dynein heavy chain domain-containing protein 1                             | DNHD1     |
| Not defined | sp    | Q96MC2  | DRC1_HUMAN   | Dynein regulatory complex protein 1                                        | DRC1      |
| Not defined | sp    | Q96MF7  | NSE2_HUMAN   | E3 SUMO-protein ligase NSE2                                                | NSMCE2    |
| Not defined | sp    | Q96MG7  | NSE3_HUMAN   | Non-structural maintenance of chromosomes element 3 homolog                | NSMCE3    |
| Not defined | sp    | Q96MH2  | HEX12_HUMAN  | Protein HEXIM2                                                             | HEXIM2    |
| Not defined | sp    | Q96MH6  | TMM68_HUMAN  | Transmembrane protein 68                                                   | TMM68     |
| Not defined | sp    | Q96MT8  | CEP63_HUMAN  | Centrosomal protein of 63 kDa                                              | CEP63     |
| Not defined | sp    | Q96MU7  | YTHDC1_HUMAN | YTH domain-containing protein 1                                            | YTHDC1    |
| Not defined | sp    | Q96MW1  | CCD43_HUMAN  | Coiled-coil domain-containing protein 43                                   | CCDC43    |
| Not defined | sp    | Q96MW7  | TIGD1_HUMAN  | Tigger transposable element-derived protein 1                              | TIGD1     |
| Not defined | sp    | Q96MX6  | WDR92_HUMAN  | WD repeat-containing protein 92                                            | WDR92     |
| Not defined | sp    | Q96N16  | JKIP1_HUMAN  | Janus kinase and microtubule-interacting protein 1                         | JAKMIP1   |
| Not defined | sp    | Q96N23  | CFA54_HUMAN  | Cilia- and flagella-associated protein 54                                  | CFAP54    |
| Not defined | sp    | Q96N46  | TTC14_HUMAN  | Tetratricopeptide repeat protein 14                                        | TTC14     |
| Not defined | sp    | Q96NB3  | ZN830_HUMAN  | Zinc finger protein 830                                                    | ZNF830    |
| Not defined | sp    | Q96NC0  | ZMAT2_HUMAN  | Zinc finger matrin-type protein 2                                          | ZMAT2     |
| Not defined | sp    | Q96ND0  | F210A_HUMAN  | Protein FAM210A                                                            | FAM210A   |
| Not defined | sp    | Q96NG3  | TTC25_HUMAN  | Tetratricopeptide repeat protein 25                                        | TTC25     |
| Not defined | sp    | Q96NG8  | ZN582_HUMAN  | Zinc finger protein 582                                                    | ZNF582    |
| Not defined | sp    | Q96NS8  | CLUHP3_HUMAN | Putative protein CLUHP3                                                    | CLUHP3    |
| Not defined | sp    | Q96NT0  | CC115_HUMAN  | Coiled-coil domain-containing protein 115                                  | CCDC115   |
| Not defined | sp    | Q96NW4  | ANR27_HUMAN  | Ankyrin repeat domain-containing protein 27                                | ANKRD27   |
| Not defined | sp    | Q96NW7  | LRRC7_HUMAN  | Leucine-rich repeat-containing protein 7                                   | LRRC7     |
| Not defined | sp    | Q96NV8  | NECT4_HUMAN  | Nectin-4                                                                   | NECTIN4   |
| Not defined | sp    | Q96P16  | RPR1A_HUMAN  | Regulation of nuclear pre-mRNA domain-containing protein 1A                | RPRD1A    |
| Not defined | sp    | Q96P20  | NLRP3_HUMAN  | NACHT, LRR and PYD domains-containing protein 3                            | NLRP3     |
| Not defined | sp    | Q96P44  | COLA1_HUMAN  | Collagen alpha-1(XI) chain                                                 | COL21A1   |
| Not defined | sp    | Q96P48  | ARAP1_HUMAN  | Arf-GAP with Rho-GAP domain, ANK repeat and PH domain-containing protein 1 | ARAP1     |
| Not defined | sp    | Q96P70  | IPO9_HUMAN   | Importin-9                                                                 | IPO9      |
| Not defined | sp    | Q96PC5  | MIA2_HUMAN   | Melanoma inhibitory activity protein 2                                     | MIA2      |
| Not defined | sp    | Q96PD2  | DCBD2_HUMAN  | Discoidin, CUB and LCCL domain-containing protein 2                        | DCBLD2    |
| Not defined | sp    | Q96PE2  | ARHGH_HUMAN  | Rho guanine nucleotide exchange factor 17                                  | ARHGEF17  |
| Not defined | sp    | Q96PE7  | MCCE_HUMAN   | Methylmalonyl-CoA epimerase, mitochondrial                                 | MCCE      |
| Not defined | sp    | Q96PH1  | NOX5_HUMAN   | NADPH oxidase 5                                                            | NOX5      |
| Not defined | sp    | Q96PK6  | RBM14_HUMAN  | RNA-binding protein 14                                                     | RBM14     |
| Not defined | sp    | Q96PM9  | Z385A_HUMAN  | Zinc finger protein 385A                                                   | ZNF385A   |

Supplementary Table 2.xlsx

| Cluster     | class | UNIPROT | UNIPROT_ID   | Description                                                                  | GN       |
|-------------|-------|---------|--------------|------------------------------------------------------------------------------|----------|
| Not defined | sp    | Q96PR1  | KCNC2_HUMAN  | Potassium voltage-gated channel subfamily C member 2                         | KCNC2    |
| Not defined | sp    | Q96PU4  | UHRF2_HUMAN  | E3 ubiquitin-protein ligase UHRF2                                            | UHRF2    |
| Not defined | sp    | Q96PU8  | QKI_HUMAN    | Protein quaking                                                              | QKI      |
| Not defined | sp    | Q96PX9  | PKH4B_HUMAN  | Pleckstrin homology domain-containing family G member 4B                     | PLEKHG4B |
| Not defined | sp    | Q96P20  | PUS7_HUMAN   | Pseudouridylate synthase 7 homolog                                           | PUS7     |
| Not defined | sp    | Q96Q11  | TRNT1_HUMAN  | CCA tRNA nucleotidyltransferase 1, mitochondrial                             | TRNT1    |
| Not defined | sp    | Q96Q40  | CDK15_HUMAN  | Cyclin-dependent kinase 15                                                   | CDK15    |
| Not defined | sp    | Q96Q42  | ALS2_HUMAN   | Alsin                                                                        | ALS2     |
| Not defined | sp    | Q96Q45  | TM237_HUMAN  | Transmembrane protein 237                                                    | TMEM237  |
| Not defined | sp    | Q96Q83  | ALKB3_HUMAN  | Alpha-ketoglutarate-dependent dioxygenase alkB homolog 3                     | ALKBH3   |
| Not defined | sp    | Q96Q91  | B3A4_HUMAN   | Anion exchange protein 4                                                     | SLC4A9   |
| Not defined | sp    | Q96QB1  | RHG07_HUMAN  | Rho GTPase-activating protein 7                                              | DLC1     |
| Not defined | sp    | Q96QC0  | PP1RA_HUMAN  | Serine/threonine-protein phosphatase 1 regulatory subunit 10                 | PPP1R10  |
| Not defined | sp    | Q96QD5  | DEPD7_HUMAN  | DEP domain-containing protein 7                                              | DEPDC7   |
| Not defined | sp    | Q96QD8  | S38A2_HUMAN  | Sodium-coupled neutral amino acid transporter 2                              | SLC38A2  |
| Not defined | sp    | Q96Q1   | VPS35_HUMAN  | Vacuolar protein sorting-associated protein 35                               | VPS35    |
| Not defined | sp    | Q96QR8  | PURB_HUMAN   | Transcriptional activator protein Pur-beta                                   | PURB     |
| Not defined | sp    | Q96QT4  | TRPM7_HUMAN  | Transient receptor potential cation channel subfamily M member 7             | TRPM7    |
| Not defined | sp    | Q96Q27  | MAGI1_HUMAN  | Membrane-associated guanylate kinase, WW and PDZ domain-containing protein 1 | MAGI1    |
| Not defined | sp    | Q96R05  | RET7_HUMAN   | Retinoid-binding protein 7                                                   | RBP7     |
| Not defined | sp    | Q96RD7  | PANX1_HUMAN  | Pannexin-1                                                                   | PANX1    |
| Not defined | sp    | Q96R6   | FER3L_HUMAN  | Fer3-like protein                                                            | FER3D3L  |
| Not defined | sp    | Q96RN5  | MED15_HUMAN  | Mediator of RNA polymerase II transcription subunit 15                       | MED15    |
| Not defined | sp    | Q96RQ1  | ERG12_HUMAN  | Endoplasmic reticulum-Golgi intermediate compartment protein 2               | ERGIC2   |
| Not defined | sp    | Q96RS6  | NUDC1_HUMAN  | NudC domain-containing protein 1                                             | NUDCD1   |
| Not defined | sp    | Q96RT7  | GCP6_HUMAN   | Gamma-tubulin complex component 6                                            | TUBGCP6  |
| Not defined | sp    | Q96RT8  | GCP5_HUMAN   | Gamma-tubulin complex component 5                                            | TUBGCP5  |
| Not defined | sp    | Q96RU3  | FNBP1_HUMAN  | Formin-binding protein 1                                                     | FNBP1    |
| Not defined | sp    | Q96RU8  | TRIB1_HUMAN  | Tribbles homolog 1                                                           | TRIB1    |
| Not defined | sp    | Q96RV3  | PCX1_HUMAN   | Pecanex-like protein 1                                                       | PCNX1    |
| Not defined | sp    | Q96RW7  | HMCN1_HUMAN  | Hemicentin-1                                                                 | HMCN1    |
| Not defined | sp    | Q96RY7  | IFT140_HUMAN | Intraflagellar transport protein 140 homolog                                 | IFT140   |
| Not defined | sp    | Q96S19  | MTL26_HUMAN  | Methyltransferase-like 26                                                    | METTL26  |
| Not defined | sp    | Q96S44  | PRPK_HUMAN   | EKC/KEOPS complex subunit TP53RK                                             | TP53RK   |
| Not defined | sp    | Q96S52  | PIGS_HUMAN   | GPI transamidase component PIG-5                                             | PIGS     |
| Not defined | sp    | Q96S55  | WRIP1_HUMAN  | ATPase WRNIP1                                                                | WRNIP1   |
| Not defined | sp    | Q96S82  | UBL7_HUMAN   | Ubiquitin-like protein 7                                                     | UBL7     |
| Not defined | sp    | Q96S86  | HPLN3_HUMAN  | Hyaluronan and proteoglycan link protein 3                                   | HAPLN3   |
| Not defined | sp    | Q96S97  | MYADM_HUMAN  | Myeloid-associated differentiation marker                                    | MYADM    |
| Not defined | sp    | Q96S99  | PKHF1_HUMAN  | Pleckstrin homology domain-containing family F member 1                      | PLEKHF1  |
| Not defined | sp    | Q96SB3  | NEB2_HUMAN   | Neurabin-2                                                                   | PPP1R9B  |
| Not defined | sp    | Q96SB4  | SRPK1_HUMAN  | SRSF protein kinase 1                                                        | SRPK1    |
| Not defined | sp    | Q96SD1  | DCR1C_HUMAN  | Protein artemis                                                              | DCLRE1C  |
| Not defined | sp    | Q96SE7  | ZN347_HUMAN  | Zinc finger protein 347                                                      | ZNF347   |
| Not defined | sp    | Q96S19  | STRBP_HUMAN  | Spermatid perinuclear RNA-binding protein                                    | STRBP    |
| Not defined | sp    | Q96ST2  | IWS1_HUMAN   | Protein IWS1 homolog                                                         | IWS1     |
| Not defined | sp    | Q96ST3  | SIN3A_HUMAN  | Paired amphipathic helix protein Sin3a                                       | SIN3A    |
| Not defined | sp    | Q96ST8  | CEP89_HUMAN  | Centrosomal protein of 89 kDa                                                | CEP89    |
| Not defined | sp    | Q96SU4  | OSBL9_HUMAN  | Oxysterol-binding protein-related protein 9                                  | OSBP9    |
| Not defined | sp    | Q96SV0  | IINT14_HUMAN | Integrator complex subunit 14                                                | IINTS14  |
| Not defined | sp    | Q96S24  | ZSC10_HUMAN  | Zinc finger and SCAN domain-containing protein 10                            | ZSCAN10  |
| Not defined | sp    | Q96S25  | AEDO_HUMAN   | 2-aminoethanethiol dioxygenase                                               | ADO      |
| Not defined | sp    | Q96T17  | MAP7D2_HUMAN | MAP7 domain-containing protein 2                                             | MAP7D2   |
| Not defined | sp    | Q96T23  | RSF1_HUMAN   | Remodeling and spacing factor 1                                              | RSF1     |
| Not defined | sp    | Q96T37  | RBM15_HUMAN  | RNA-binding protein 15                                                       | RBM15    |
| Not defined | sp    | Q96T51  | RUFY1_HUMAN  | RUN and FYVE domain-containing protein 1                                     | RUFY1    |
| Not defined | sp    | Q96T52  | IMP2L_HUMAN  | Mitochondrial inner membrane protease subunit 2                              | IMMP2L   |
| Not defined | sp    | Q96T55  | KCNKG_HUMAN  | Potassium channel subfamily K member 16                                      | KCNK16   |
| Not defined | sp    | Q96T58  | MINT_HUMAN   | Msx2-interacting protein                                                     | SPEN     |
| Not defined | sp    | Q96T60  | PNKP_HUMAN   | Bifunctional polynucleotide phosphatase/kinase                               | PNKP     |
| Not defined | sp    | Q96T76  | MMS19_HUMAN  | MMS19 nucleotide excision repair protein homolog                             | MMS19    |
| Not defined | sp    | Q96T88  | UHRF1_HUMAN  | E3 ubiquitin-protein ligase UHRF1                                            | UHRF1    |
| Not defined | sp    | Q96TA1  | NIBA2_HUMAN  | Protein Niban 2                                                              | NIBAN2   |
| Not defined | sp    | Q96TC7  | RMD3_HUMAN   | Regulator of microtubule dynamics protein 3                                  | RMDN3    |
| Not defined | sp    | Q99081  | HTF4_HUMAN   | Transcription factor 12                                                      | TCF12    |
| Not defined | sp    | Q99102  | MUC4_HUMAN   | Mucin-4                                                                      | MUC4     |
| Not defined | sp    | Q99435  | NELL2_HUMAN  | Protein kinase C-binding protein NELL2                                       | NELL2    |
| Not defined | sp    | Q99442  | SEC62_HUMAN  | Translocation protein SEC62                                                  | SEC62    |
| Not defined | sp    | Q99459  | CDC5L_HUMAN  | Cell division cycle 5-like protein                                           | CDC5L    |
| Not defined | sp    | Q99460  | PSMD1_HUMAN  | 26S proteasome non-ATPase regulatory subunit 1                               | PSMD1    |
| Not defined | sp    | Q99496  | RING2_HUMAN  | E3 ubiquitin-protein ligase RING2                                            | RNF2     |
| Not defined | sp    | Q99501  | GA2L1_HUMAN  | GAS2-like protein 1                                                          | GAS2L1   |
| Not defined | sp    | Q99518  | FMO2_HUMAN   | Dimethylamine monooxygenase [N-oxide-forming] 2                              | FMO2     |
| Not defined | sp    | Q99523  | SORT_HUMAN   | Sortilin                                                                     | SORT1    |
| Not defined | sp    | Q99538  | LGMM_HUMAN   | Legumain                                                                     | LGMM     |
| Not defined | sp    | Q99541  | PLIN2_HUMAN  | Perilipin-2                                                                  | PLIN2    |
| Not defined | sp    | Q99543  | DNAJC2_HUMAN | DnaJ homolog subfamily C member 2                                            | DNAJC2   |
| Not defined | sp    | Q99547  | MPH6_HUMAN   | M-phase phosphoprotein 6                                                     | MPHOSPH6 |
| Not defined | sp    | Q99558  | M3K14_HUMAN  | Mitogen-activated protein kinase kinase kinase 14                            | MAP3K14  |
| Not defined | sp    | Q99567  | NUP88_HUMAN  | Nuclear pore complex protein Nup88                                           | NUP88    |
| Not defined | sp    | Q99571  | P2RX4_HUMAN  | P2X purinoceptor 4                                                           | P2RX4    |
| Not defined | sp    | Q99575  | POP1_HUMAN   | Ribonucleases P/MRP protein subunit POP1                                     | POP1     |
| Not defined | sp    | Q99581  | FEV_HUMAN    | Protein FEV                                                                  | FEV      |
| Not defined | sp    | Q99584  | S10AD_HUMAN  | Protein S100-A13                                                             | S100A13  |
| Not defined | sp    | Q99590  | SCAFB_HUMAN  | Protein SCAF11                                                               | SCAF11   |
| Not defined | sp    | Q99595  | TI17A_HUMAN  | Mitochondrial import inner membrane translocase subunit Tim17-A              | TIMM17A  |
| Not defined | sp    | Q99611  | SPS2_HUMAN   | Selenide, water dikinase 2                                                   | SEPHS2   |
| Not defined | sp    | Q99613  | EIF3C_HUMAN  | Eukaryotic translation initiation factor 3 subunit C                         | EIF3C    |
| Not defined | sp    | Q99615  | DNAJC7_HUMAN | DnaJ homolog subfamily C member 7                                            | DNAJC7   |
| Not defined | sp    | Q99618  | CDCA3_HUMAN  | Cell division cycle-associated protein 3                                     | CDCA3    |



Supplementary Table 2.xlsx

| Cluster     | class | UNIPROT | UNIPROT_ID   | Description                                                                    | GN        |
|-------------|-------|---------|--------------|--------------------------------------------------------------------------------|-----------|
| Not defined | sp    | Q99622  | C10_HUMAN    | Protein C10                                                                    | C12orf57  |
| Not defined | sp    | Q99623  | PHB2_HUMAN   | Prohibitin-2                                                                   | PHB2      |
| Not defined | sp    | Q99643  | C560_HUMAN   | Succinate dehydrogenase cytochrome b560 subunit, mitochondrial                 | SDHC      |
| Not defined | sp    | Q99653  | CHP1_HUMAN   | Calcineurin B homologous protein 1                                             | CHP1      |
| Not defined | sp    | Q99674  | CGRE1_HUMAN  | Cell growth regulator with EF hand domain protein 1                            | CGREF1    |
| Not defined | sp    | Q99700  | ATX2_HUMAN   | Ataxin-2                                                                       | ATXN2     |
| Not defined | sp    | Q99719  | SEPT5_HUMAN  | Septin-5                                                                       | SEPTIN5   |
| Not defined | sp    | Q99732  | LITAF_HUMAN  | Lipopolysaccharide-induced tumor necrosis factor-alpha factor                  | LITAF     |
| Not defined | sp    | Q99735  | MGST2_HUMAN  | Microsomal glutathione S-transferase 2                                         | MGST2     |
| Not defined | sp    | Q99742  | NPAS1_HUMAN  | Neuronal PAS domain-containing protein 1                                       | NPAS1     |
| Not defined | sp    | Q99747  | SNAG_HUMAN   | Gamma-soluble NSF attachment protein                                           | NAPG      |
| Not defined | sp    | Q99757  | THIOM_HUMAN  | Thioredoxin, mitochondrial                                                     | TXN2      |
| Not defined | sp    | Q99758  | ABCA3_HUMAN  | ATP-binding cassette sub-family A member 3                                     | ABCA3     |
| Not defined | sp    | Q99766  | ATP5S_HUMAN  | ATP synthase subunit s, mitochondrial                                          | DMAC2L    |
| Not defined | sp    | Q99797  | MIPEP_HUMAN  | Mitochondrial intermediate peptidase                                           | MIPEP     |
| Not defined | sp    | Q99805  | TM9S2_HUMAN  | Transmembrane 9 superfamily member 2                                           | TM9SF2    |
| Not defined | sp    | Q99807  | COQ7_HUMAN   | 5-demethoxyubiquinone hydroxylase, mitochondrial                               | COQ7      |
| Not defined | sp    | Q99808  | S29A1_HUMAN  | Equilibrative nucleoside transporter 1                                         | SLC29A1   |
| Not defined | sp    | Q99816  | TS101_HUMAN  | Tumor susceptibility gene 101 protein                                          | TSG101    |
| Not defined | sp    | Q99828  | CIB1_HUMAN   | Calcium and integrin-binding protein 1                                         | CIB1      |
| Not defined | sp    | Q99832  | TCPH_HUMAN   | T-complex protein 1 subunit eta                                                | CCT7      |
| Not defined | sp    | Q99865  | SPI2A_HUMAN  | Spindlin-2A                                                                    | SPIN2A    |
| Not defined | sp    | Q99928  | GBRG3_HUMAN  | Gamma-aminobutyric acid receptor subunit gamma-3                               | GABRG3    |
| Not defined | sp    | Q99933  | BAG1_HUMAN   | BAG family molecular chaperone regulator 1                                     | BAG1      |
| Not defined | sp    | Q99961  | SH3G1_HUMAN  | Endophilin-A2                                                                  | SH3GL1    |
| Not defined | sp    | Q99962  | SH3G2_HUMAN  | Endophilin-A1                                                                  | SH3GL2    |
| Not defined | sp    | Q99973  | TEP1_HUMAN   | Telomerase protein component 1                                                 | TEP1      |
| Not defined | sp    | Q99985  | SEM3C_HUMAN  | Semaphorin-3C                                                                  | SEMA3C    |
| Not defined | sp    | Q99988  | GDF15_HUMAN  | Growth/differentiation factor 15                                               | GDF15     |
| Not defined | sp    | Q99996  | AKAP9_HUMAN  | A-kinase anchor protein 9                                                      | AKAP9     |
| Not defined | sp    | Q9BP06  | DPYL5_HUMAN  | Dihydropyrimidinase-related protein 5                                          | DPYSL5    |
| Not defined | sp    | Q9BPX7  | CG025_HUMAN  | UPF0415 protein C7orf25                                                        | C7orf25   |
| Not defined | sp    | Q9BPZ2  | SPI2B_HUMAN  | Spindlin-2B                                                                    | SPIN2B    |
| Not defined | sp    | Q9BPZ3  | PAIP2_HUMAN  | Polyadenylate-binding protein-interacting protein 2                            | PAIP2     |
| Not defined | sp    | Q9BQ04  | RBM4B_HUMAN  | RNA-binding protein 4B                                                         | RBM4B     |
| Not defined | sp    | Q9BQ15  | SOSB1_HUMAN  | SOSS complex subunit B1                                                        | NABP2     |
| Not defined | sp    | Q9BQ39  | DDX50_HUMAN  | ATP-dependent RNA helicase DDX50                                               | DDX50     |
| Not defined | sp    | Q9BQ48  | RM34_HUMAN   | 39S ribosomal protein L34, mitochondrial                                       | MRPL34    |
| Not defined | sp    | Q9BQ52  | RN22_HUMAN   | Zinc phosphodiesterase ELAC protein 2                                          | ELAC2     |
| Not defined | sp    | Q9BQ67  | GRWD1_HUMAN  | Glutamate-rich WD repeat-containing protein 1                                  | GRWD1     |
| Not defined | sp    | Q9BQ70  | TCF25_HUMAN  | Transcription factor 25                                                        | TCF25     |
| Not defined | sp    | Q9BQ75  | CMS1_HUMAN   | Protein CMSS1                                                                  | CMSS1     |
| Not defined | sp    | Q9BQ87  | TBL1Y_HUMAN  | F-box-like/WD repeat-containing protein TBL1Y                                  | TBL1Y     |
| Not defined | sp    | Q9BQ95  | EC5IT_HUMAN  | Evolutionarily conserved signaling intermediate in Toll pathway, mitochondrial | EC5IT     |
| Not defined | sp    | Q9BQC3  | DPH2_HUMAN   | 2-(3-amino-3-carboxypropyl)histidine synthase subunit 2                        | DPH2      |
| Not defined | sp    | Q9BQC6  | RT63_HUMAN   | Ribosomal protein 63, mitochondrial                                            | MRPL57    |
| Not defined | sp    | Q9BQE4  | SELS_HUMAN   | Selenoprotein S                                                                | SELENOS   |
| Not defined | sp    | Q9BQE5  | APOL2_HUMAN  | Apolipoprotein L2                                                              | APOL2     |
| Not defined | sp    | Q9BQE9  | BCL7B_HUMAN  | B-cell CLL/lymphoma 7 protein family member B                                  | BCL7B     |
| Not defined | sp    | Q9BQG0  | IMBB1A_HUMAN | Myb-binding protein 1A                                                         | MYBBP1A   |
| Not defined | sp    | Q9BQ10  | AIF1L_HUMAN  | Allograft inflammatory factor 1-like                                           | AIF1L     |
| Not defined | sp    | Q9BQ77  | MGME1_HUMAN  | Mitochondrial genome maintenance exonuclease 1                                 | MGME1     |
| Not defined | sp    | Q9BQ58  | FYCO1_HUMAN  | FYVE and coiled-coil domain-containing protein 1                               | FYCO1     |
| Not defined | sp    | Q9BR09  | NEUL2_HUMAN  | Neuralized-like protein 2                                                      | NEURL2    |
| Not defined | sp    | Q9BR11  | ZSWM1_HUMAN  | Zinc finger SWIM domain-containing protein 1                                   | ZSWIM1    |
| Not defined | sp    | Q9BRF8  | CPPED_HUMAN  | Serine/threonine-protein phosphatase CPPED1                                    | CPPED1    |
| Not defined | sp    | Q9BRG1  | VPS25_HUMAN  | Vacuolar protein-sorting-associated protein 25                                 | VPS25     |
| Not defined | sp    | Q9BRK4  | LZTS2_HUMAN  | Leucine zipper putative tumor suppressor 2                                     | LZTS2     |
| Not defined | sp    | Q9BRK5  | CAB45_HUMAN  | 45 kDa calcium-binding protein                                                 | SDF4      |
| Not defined | sp    | Q9BRP1  | PDD2L_HUMAN  | Programmed cell death protein 2-like                                           | PDCD2L    |
| Not defined | sp    | Q9BRP4  | PAAF1_HUMAN  | Proteasomal ATPase-associated factor 1                                         | PAAF1     |
| Not defined | sp    | Q9BRP7  | FDXA1_HUMAN  | Ferredoxin-fold anticodon-binding domain-containing protein 1                  | FDXACB1   |
| Not defined | sp    | Q9BRQ0  | PYG02_HUMAN  | Pygopus homolog 2                                                              | PYG02     |
| Not defined | sp    | Q9BRQ6  | MIC25_HUMAN  | MICOS complex subunit MIC25                                                    | CHCHD6    |
| Not defined | sp    | Q9BRQ8  | FSP1_HUMAN   | Ferroptosis suppressor protein 1                                               | AIFM2     |
| Not defined | sp    | Q9BRR6  | ADPGK_HUMAN  | ADP-dependent glucokinase                                                      | ADPGK     |
| Not defined | sp    | Q9BRR8  | GPTC1_HUMAN  | G patch domain-containing protein 1                                            | GPATCH1   |
| Not defined | sp    | Q9BRT2  | UQC22_HUMAN  | Ubiquinol-cytochrome-c reductase complex assembly factor 2                     | UQC22     |
| Not defined | sp    | Q9BRT3  | MIEN1_HUMAN  | Migration and invasion enhancer 1                                              | MIEN1     |
| Not defined | sp    | Q9BRT6  | LLPH_HUMAN   | Protein LLP homolog                                                            | LLPH      |
| Not defined | sp    | Q9BRT8  | CBWD1_HUMAN  | COBW domain-containing protein 1                                               | CBWD1     |
| Not defined | sp    | Q9BRT9  | SLD5_HUMAN   | DNA replication complex GINS protein SLD5                                      | GINS4     |
| Not defined | sp    | Q9BRU2  | TCAL7_HUMAN  | Transcription elongation factor A protein-like 7                               | TCEAL7    |
| Not defined | sp    | Q9BRX5  | PSF3_HUMAN   | DNA replication complex GINS protein PSF3                                      | GINS3     |
| Not defined | sp    | Q9BS16  | CENPK_HUMAN  | Centromere protein K                                                           | CENPK     |
| Not defined | sp    | Q9BS40  | LXN_HUMAN    | Latexin                                                                        | LXN       |
| Not defined | sp    | Q9BS92  | NPS3B_HUMAN  | Protein NipSnap homolog 3B                                                     | NIPSNAP3B |
| Not defined | sp    | Q9BSB4  | ATGA1_HUMAN  | Autophagy-related protein 101                                                  | ATG101    |
| Not defined | sp    | Q9BSF5  | SPEB_HUMAN   | Agmatinase, mitochondrial                                                      | AGMAT     |
| Not defined | sp    | Q9BSF4  | TIM29_HUMAN  | Mitochondrial import inner membrane translocase subunit Tim29                  | TIMM29    |
| Not defined | sp    | Q9BSH4  | TACO1_HUMAN  | Translational activator of cytochrome c oxidase 1                              | TACO1     |
| Not defined | sp    | Q9BSH5  | HDHD3_HUMAN  | Haloacid dehalogenase-like hydrolase domain-containing protein 3               | HDHD3     |
| Not defined | sp    | Q9BSL1  | UBAC1_HUMAN  | Ubiquitin-associated domain-containing protein 1                               | UBAC1     |
| Not defined | sp    | Q9BSO5  | CCM2_HUMAN   | Cerebral cavernous malformations 2 protein                                     | CCM2      |
| Not defined | sp    | Q9BSR8  | YIPF4_HUMAN  | Protein YIPF4                                                                  | YIPF4     |
| Not defined | sp    | Q9BSU3  | NAA11_HUMAN  | N-alpha-acetyltransferase 11                                                   | NAA11     |
| Not defined | sp    | Q9BSV6  | SEN34_HUMAN  | tRNA-splicing endonuclease subunit Sen34                                       | TSEN34    |
| Not defined | sp    | Q9BT09  | CNPY3_HUMAN  | Protein canopy homolog 3                                                       | CNPY3     |
| Not defined | sp    | Q9BT30  | ALKB7_HUMAN  | Alpha-ketoglutarate-dependent dioxygenase alkB homolog 7, mitochondrial        | ALKBH7    |
| Not defined | sp    | Q9BT73  | PSMG3_HUMAN  | Proteasome assembly chaperone 3                                                | PSMG3     |

Supplementary Table 2.xlsx

| Cluster     | class | UNIPROT | UNIPROT_ID   | Description                                                       | GN       |
|-------------|-------|---------|--------------|-------------------------------------------------------------------|----------|
| Not defined | sp    | Q9BT78  | CSN4_HUMAN   | COP9 signalosome complex subunit 4                                | COPS4    |
| Not defined | sp    | Q9BTC0  | DIDO1_HUMAN  | Death-inducer obliterator 1                                       | DIDO1    |
| Not defined | sp    | Q9BTC8  | MTA3_HUMAN   | Metastasis-associated protein MTA3                                | MTA3     |
| Not defined | sp    | Q9BDT8  | RBM42_HUMAN  | RNA-binding protein 42                                            | RBM42    |
| Not defined | sp    | Q9BT00  | NAT9_HUMAN   | N-acetyltransferase 9                                             | NAT9     |
| Not defined | sp    | Q9BTL3  | RAMAC_HUMAN  | RNA guanine-N7 methyltransferase activating subunit               | RAMAC    |
| Not defined | sp    | Q9BTT4  | MED10_HUMAN  | Mediator of RNA polymerase II transcription subunit 10            | MED10    |
| Not defined | sp    | Q9BTV5  | FSD1_HUMAN   | Fibronectin type III and SPRY domain-containing protein 1         | FSD1     |
| Not defined | sp    | Q9BTY2  | FUCO2_HUMAN  | Plasma alpha-L-fucosidase                                         | FUCA2    |
| Not defined | sp    | Q9BTY7  | HGH1_HUMAN   | Protein HGH1 homolog                                              | HGH1     |
| Not defined | sp    | Q9BTZ2  | DHRS4_HUMAN  | Dehydrogenase/reductase SDR family member 4                       | DHRS4    |
| Not defined | sp    | Q9BUD6  | SPON2_HUMAN  | Spondin-2                                                         | SPON2    |
| Not defined | sp    | Q9BUG6  | ZSASA_HUMAN  | Zinc finger and SCAN domain-containing protein 5A                 | ZSCAN5A  |
| Not defined | sp    | Q9BUH6  | PAXX_HUMAN   | Protein PAXX                                                      | PAXX     |
| Not defined | sp    | Q9BUH8  | BEGIN_HUMAN  | Brain-enriched guanylate kinase-associated protein                | BEGAIN   |
| Not defined | sp    | Q9BUK0  | CHCH7_HUMAN  | Coiled-coil-helix-coiled-coil-helix domain-containing protein 7   | CHCHD7   |
| Not defined | sp    | Q9BUL5  | PHF23_HUMAN  | PHD finger protein 23                                             | PHF23    |
| Not defined | sp    | Q9BUL9  | RPP25_HUMAN  | Ribonuclease P protein subunit p25                                | RPP25    |
| Not defined | sp    | Q9BUP0  | EFHD1_HUMAN  | EF-hand domain-containing protein D1                              | EFHD1    |
| Not defined | sp    | Q9BUQ8  | DDX23_HUMAN  | Probable ATP-dependent RNA helicase DDX23                         | DDX23    |
| Not defined | sp    | Q9BUR5  | MIC26_HUMAN  | MICOS complex subunit MIC26                                       | AP00     |
| Not defined | sp    | Q9BU11  | BDH2_HUMAN   | 3-hydroxybutyrate dehydrogenase type 2                            | BDH2     |
| Not defined | sp    | Q9BUT9  | MCR12_HUMAN  | MAPK regulated corepressor interacting protein 2                  | MCRIP2   |
| Not defined | sp    | Q9BUV0  | RSRP1_HUMAN  | Arginine/serine-rich protein 1                                    | RSRP1    |
| Not defined | sp    | Q9BU11  | CHAC1_HUMAN  | Glutathione-specific gamma-glutamylcyclotransferase 1             | CHAC1    |
| Not defined | sp    | Q9BV19  | CA050_HUMAN  | Uncharacterized protein C1orf50                                   | C1orf50  |
| Not defined | sp    | Q9BV38  | WDR18_HUMAN  | WD repeat-containing protein 18                                   | WDR18    |
| Not defined | sp    | Q9BV79  | MECR_HUMAN   | Enoyl-[acyl-carrier-protein] reductase, mitochondrial             | MECR     |
| Not defined | sp    | Q9BV86  | NTM1A_HUMAN  | N-terminal Xaa-Pro-Lys N-methyltransferase 1                      | NTMT1    |
| Not defined | sp    | Q9BVC5  | ASHWN_HUMAN  | Ashwin                                                            | C2orf49  |
| Not defined | sp    | Q9BVG4  | PBDC1_HUMAN  | Protein PBDC1                                                     | PBDC1    |
| Not defined | sp    | Q9BV68  | KIFC3_HUMAN  | Kinesin-like protein KIFC3                                        | KIFC3    |
| Not defined | sp    | Q9BV16  | UT14A_HUMAN  | U3 small nucleolar RNA-associated protein 14 homolog A            | UTP14A   |
| Not defined | sp    | Q9BV17  | DUS23_HUMAN  | Dual specificity protein phosphatase 23                           | DUSP23   |
| Not defined | sp    | Q9BVL4  | SELO_HUMAN   | Protein adenyltransferase SeLO, mitochondrial                     | SELENOO  |
| Not defined | sp    | Q9BVM4  | GGACT_HUMAN  | Gamma-glutamylaminocyclotransferase                               | GGACT    |
| Not defined | sp    | Q9BVP2  | GNL3_HUMAN   | Guanine nucleotide-binding protein-like 3                         | GNL3     |
| Not defined | sp    | Q9BV78  | TMUB1_HUMAN  | Transmembrane and ubiquitin-like domain-containing protein 1      | TMUB1    |
| Not defined | sp    | Q9BW04  | SARG_HUMAN   | Specifically androgen-regulated gene protein                      | SARG     |
| Not defined | sp    | Q9BW19  | KIFC1_HUMAN  | Kinesin-like protein KIFC1                                        | KIFC1    |
| Not defined | sp    | Q9BW27  | NUP85_HUMAN  | Nuclear pore complex protein Nup85                                | NUP85    |
| Not defined | sp    | Q9BW61  | DDA1_HUMAN   | DET1- and DDB1-associated protein 1                               | DDA1     |
| Not defined | sp    | Q9BW72  | HIG2A_HUMAN  | HIG1 domain family member 2A, mitochondrial                       | HIG20A   |
| Not defined | sp    | Q9BW83  | IFT27_HUMAN  | Intraflagellar transport protein 27 homolog                       | IFT27    |
| Not defined | sp    | Q9BW85  | YJU2_HUMAN   | Splicing factor YJU2                                              | YJU2     |
| Not defined | sp    | Q9BW91  | NUDT9_HUMAN  | ADP-ribose pyrophosphatase, mitochondrial                         | NUDT9    |
| Not defined | sp    | Q9BWD1  | THIC_HUMAN   | Acetyl-CoA acetyltransferase, cytosolic                           | ACAT2    |
| Not defined | sp    | Q9BWD3  | RTL8A_HUMAN  | Retrotransposon Gag-like protein 8A                               | RTL8A    |
| Not defined | sp    | Q9BWF3  | RBM4_HUMAN   | RNA-binding protein 4                                             | RBM4     |
| Not defined | sp    | Q9BWH2  | FUND2_HUMAN  | FUN14 domain-containing protein 2                                 | FUND2    |
| Not defined | sp    | Q9BWJ5  | SF3B5_HUMAN  | Splicing factor 3B subunit 5                                      | SF3B5    |
| Not defined | sp    | Q9BWS9  | CHID1_HUMAN  | Chitinase domain-containing protein 1                             | CHID1    |
| Not defined | sp    | Q9BX40  | LS14B_HUMAN  | Protein LSM14 homolog B                                           | LSM14B   |
| Not defined | sp    | Q9BX46  | RBM24_HUMAN  | RNA-binding protein 24                                            | RBM24    |
| Not defined | sp    | Q9BX67  | JAM3_HUMAN   | Junctional adhesion molecule C                                    | JAM3     |
| Not defined | sp    | Q9BX82  | ZN471_HUMAN  | Zinc finger protein 471                                           | ZNF471   |
| Not defined | sp    | Q9BX97  | PLVAP_HUMAN  | Plasmalemma vesicle-associated protein                            | PLVAP    |
| Not defined | sp    | Q9BXA6  | TSSK6_HUMAN  | Testis-specific serine/threonine-protein kinase 6                 | TSSK6    |
| Not defined | sp    | Q9BXE9  | VN1R3_HUMAN  | Vomerolateral type-1 receptor 3                                   | VN1R3    |
| Not defined | sp    | Q9BXF3  | CECR2_HUMAN  | Cat eye syndrome critical region protein 2                        | CECR2    |
| Not defined | sp    | Q9BXF9  | TEKT3_HUMAN  | Tektin-3                                                          | TEKT3    |
| Not defined | sp    | Q9BXG8  | SPZ1_HUMAN   | Spermatogenic leucine zipper protein 1                            | SPZ1     |
| Not defined | sp    | Q9BXJ1  | C1QTN1_HUMAN | Complement C1q tumor necrosis factor-related protein 1            | C1QTNF1  |
| Not defined | sp    | Q9BXI9  | NAA15_HUMAN  | N-alpha-acetyltransferase 15, NatA auxiliary subunit              | NAA15    |
| Not defined | sp    | Q9BXX1  | KLF16_HUMAN  | Kruppel-like factor 16                                            | KLF16    |
| Not defined | sp    | Q9BXL7  | CAR11_HUMAN  | Caspase recruitment domain-containing protein 11                  | CARD11   |
| Not defined | sp    | Q9BXN1  | ASPN_HUMAN   | Asporin                                                           | ASPN     |
| Not defined | sp    | Q9BXP2  | S12A9_HUMAN  | Solute carrier family 12 member 9                                 | SLC12A9  |
| Not defined | sp    | Q9BXP5  | SRRT_HUMAN   | Serrate RNA effector molecule homolog                             | SRRT     |
| Not defined | sp    | Q9BX54  | TMM59_HUMAN  | Transmembrane protein 59                                          | TMM59    |
| Not defined | sp    | Q9BX55  | AP1M1_HUMAN  | AP-1 complex subunit mu-1                                         | AP1M1    |
| Not defined | sp    | Q9BXT2  | CCG6_HUMAN   | Voltage-dependent calcium channel gamma-6 subunit                 | CACNG6   |
| Not defined | sp    | Q9BXT5  | TEX15_HUMAN  | Testis-expressed protein 15                                       | TEX15    |
| Not defined | sp    | Q9BXT8  | RNF17_HUMAN  | RING finger protein 17                                            | RNF17    |
| Not defined | sp    | Q9BXU7  | UBP26_HUMAN  | Ubiquitin carboxyl-terminal hydrolase 26                          | USP26    |
| Not defined | sp    | Q9BXV9  | GON7_HUMAN   | EKC/KEOPS complex subunit GON7                                    | GON7     |
| Not defined | sp    | Q9BXW6  | OSBL1_HUMAN  | Oxysterol-binding protein-related protein 1                       | OSBPL1A  |
| Not defined | sp    | Q9BXW7  | HDHD5_HUMAN  | Haloacid dehalogenase-like hydrolase domain-containing 5          | HDHD5    |
| Not defined | sp    | Q9BXX2  | ANK30B_HUMAN | Ankyrin repeat domain-containing protein 30B                      | ANKRD30B |
| Not defined | sp    | Q9BXV0  | MAK16_HUMAN  | Protein MAK16 homolog                                             | MAK16    |
| Not defined | sp    | Q9BY07  | S4A5_HUMAN   | Electrogenic sodium bicarbonate cotransporter 4                   | SLC4A5   |
| Not defined | sp    | Q9BY11  | PACN1_HUMAN  | Protein kinase C and casein kinase substrate in neurons protein 1 | PACSN1   |
| Not defined | sp    | Q9BY32  | ITPA_HUMAN   | Inosine triphosphate pyrophosphatase                              | ITPA     |
| Not defined | sp    | Q9BY41  | HDAC8_HUMAN  | Histone deacetylase 8                                             | HDAC8    |
| Not defined | sp    | Q9BY42  | RTF2_HUMAN   | Replication termination factor 2                                  | RTF2     |
| Not defined | sp    | Q9BY49  | PECR_HUMAN   | Peroxisomal trans-2-enoyl-CoA reductase                           | PECR     |
| Not defined | sp    | Q9BY77  | PDIP3_HUMAN  | Polymerase delta-interacting protein 3                            | POLDIP3  |
| Not defined | sp    | Q9BY89  | K1671_HUMAN  | Uncharacterized protein KIAA1671                                  | KIAA1671 |
| Not defined | sp    | Q9BY80  | SHAN3_HUMAN  | SH3 and multiple ankyrin repeat domains protein 3                 | SHANK3   |
| Not defined | sp    | Q9BYC2  | SCOT2_HUMAN  | Succinyl-CoA:3-ketoacid coenzyme A transferase 2, mitochondrial   | OXCT2    |

Supplementary Table 2.xlsx

| Cluster     | class | UNIPROT | UNIPROT_ID    | Description                                                        | GN        |
|-------------|-------|---------|---------------|--------------------------------------------------------------------|-----------|
| Not defined | sp    | Q9BYC5  | FUT8_HUMAN    | Alpha-(1,6)-fucosyltransferase                                     | FUT8      |
| Not defined | sp    | Q9BYC8  | RM32_HUMAN    | 39S ribosomal protein L32, mitochondrial                           | MRPL32    |
| Not defined | sp    | Q9BYC9  | RM20_HUMAN    | 39S ribosomal protein L20, mitochondrial                           | MRPL20    |
| Not defined | sp    | Q9BYD2  | RM09_HUMAN    | 39S ribosomal protein L9, mitochondrial                            | MRPL9     |
| Not defined | sp    | Q9BYJ9  | YTHD1_HUMAN   | YTH domain-containing family protein 1                             | YTHDF1    |
| Not defined | sp    | Q9BYK8  | HELZ2_HUMAN   | Helicase with zinc finger domain 2                                 | HELZ2     |
| Not defined | sp    | Q9BYM8  | HOIL1_HUMAN   | RanBP-type and C3HC4-type zinc finger-containing protein 1         | RBCK1     |
| Not defined | sp    | Q9BYN0  | SRXN1_HUMAN   | Sulfiredoxin-1                                                     | SRXN1     |
| Not defined | sp    | Q9BYN7  | ZN341_HUMAN   | Zinc finger protein 341                                            | ZNF341    |
| Not defined | sp    | Q9BYN8  | RT26_HUMAN    | 28S ribosomal protein S26, mitochondrial                           | MRPS26    |
| Not defined | sp    | Q9BYT8  | NEUL_HUMAN    | Neurolysin, mitochondrial                                          | NLN       |
| Not defined | sp    | Q9BYU1  | PBX4_HUMAN    | Pre-B-cell leukemia transcription factor 4                         | PBX4      |
| Not defined | sp    | Q9BYV8  | CEP41_HUMAN   | Centrosomal protein of 41 kDa                                      | CEP41     |
| Not defined | sp    | Q9BYW2  | SETD2_HUMAN   | Histone-lysine N-methyltransferase SETD2                           | SETD2     |
| Not defined | sp    | Q9BYZ2  | LDH6B_HUMAN   | L-lactate dehydrogenase A-like 6B                                  | LDHAL6B   |
| Not defined | tr    | Q9BZC5  | Q9BZC5_HUMAN  | G_PROTEIN_RECEP_F1_2 domain-containing protein                     | FKSG35    |
| Not defined | sp    | Q9BZC7  | ABCA2_HUMAN   | ATP-binding cassette sub-family A member 2                         | ABCA2     |
| Not defined | sp    | Q9BZD3  | GCOM2_HUMAN   | Putative GRINL1B complex locus protein 2                           | GCOM2     |
| Not defined | sp    | Q9BZE0  | GLIS2_HUMAN   | Zinc finger protein GLIS2                                          | GLIS2     |
| Not defined | sp    | Q9BZE9  | ASPC1_HUMAN   | Tether containing UBX domain for GLUT4                             | ASPSCR1   |
| Not defined | sp    | Q9BZF1  | OSBL8_HUMAN   | Oxysterol-binding protein-related protein 8                        | OSBPL8    |
| Not defined | sp    | Q9BZF2  | OSBL7_HUMAN   | Oxysterol-binding protein-related protein 7                        | OSBPL7    |
| Not defined | sp    | Q9BZF9  | UACA_HUMAN    | Uveal autoantigen with coiled-coil domains and ankyrin repeats     | UACA      |
| Not defined | sp    | Q9BZG8  | DPH1_HUMAN    | 2-(3-amino-3-carboxypropyl)histidine synthase subunit 1            | DPH1      |
| Not defined | sp    | Q9BZJ7  | REN3B_HUMAN   | Regulator of nonsense transcripts 3B                               | UPF3B     |
| Not defined | sp    | Q9BZK7  | TBL1R_HUMAN   | F-box-like/WD repeat-containing protein TBL1XR1                    | TBL1XR1   |
| Not defined | sp    | Q9BZL1  | UBL5_HUMAN    | Ubiquitin-like protein 5                                           | UBL5      |
| Not defined | sp    | Q9BZP6  | CHIA_HUMAN    | Acidic mammalian chitinase                                         | CHIA      |
| Not defined | sp    | Q9BZQ8  | NIBA1_HUMAN   | Protein Niban 1                                                    | NIBAN1    |
| Not defined | sp    | Q9BZV1  | UBXN6_HUMAN   | UBX domain-containing protein 6                                    | UBXN6     |
| Not defined | sp    | Q9BZW7  | TSG10_HUMAN   | Testis-specific gene 10 protein                                    | TSGA10    |
| Not defined | sp    | Q9BZX2  | UCK2_HUMAN    | Uridine-cytidine kinase 2                                          | UCK2      |
| Not defined | sp    | Q9BZZ2  | SN_HUMAN      | Sialoadhesin                                                       | SIGLEC1   |
| Not defined | sp    | Q9BZZ5  | API5_HUMAN    | Apoptosis inhibitor 5                                              | API5      |
| Not defined | sp    | Q9C002  | NMES1_HUMAN   | Normal mucosa of esophagus-specific gene 1 protein                 | NMES1     |
| Not defined | sp    | Q9C091  | GRB1L_HUMAN   | GREB1-like protein                                                 | GREB1L    |
| Not defined | sp    | Q9C093  | SPEF2_HUMAN   | Sperm flagellar protein 2                                          | SPEF2     |
| Not defined | sp    | Q9C098  | DCLK3_HUMAN   | Serine/threonine-protein kinase DCLK3                              | DCLK3     |
| Not defined | sp    | Q9C0A0  | CNTP4_HUMAN   | Contactin-associated protein-like 4                                | CNTNAP4   |
| Not defined | sp    | Q9C0A6  | SETD5_HUMAN   | Histone-lysine N-methyltransferase SETD5                           | SETD5     |
| Not defined | sp    | Q9C0B1  | FTO_HUMAN     | Alpha-ketoglutarate-dependent dioxygenase FTO                      | FTO       |
| Not defined | sp    | Q9C0B5  | ZDHHC5_HUMAN  | Palmitoyltransferase ZDHHC5                                        | ZDHHC5    |
| Not defined | sp    | Q9C0B7  | TNG6_HUMAN    | Transport and Golgi organization protein 6 homolog                 | TANGO6    |
| Not defined | sp    | Q9C0C2  | TB182_HUMAN   | 182 kDa tankyrase-1-binding protein                                | TNKS1BP1  |
| Not defined | sp    | Q9C0C9  | UBE2O_HUMAN   | (E3-independent) E2 ubiquitin-conjugating enzyme                   | UBE2O     |
| Not defined | sp    | Q9C0E8  | LNP_HUMAN     | Endoplasmic reticulum junction formation protein lunapark          | LNPK      |
| Not defined | sp    | Q9C0G6  | DYH6_HUMAN    | Dynein heavy chain 6, axonemal                                     | DNAH6     |
| Not defined | sp    | Q9C0H6  | KLHL4_HUMAN   | Kelch-like protein 4                                               | KLHL4     |
| Not defined | sp    | Q9C0J8  | WDR33_HUMAN   | pre-mRNA 3' end processing protein WDR33                           | WDR33     |
| Not defined | sp    | Q9C0K3  | ARP3C_HUMAN   | Actin-related protein 3C                                           | ACTR3C    |
| Not defined | sp    | Q9GZL7  | WDR12_HUMAN   | Ribosome biogenesis protein WDR12                                  | WDR12     |
| Not defined | sp    | Q9GZM8  | NDEL1_HUMAN   | Nuclear distribution protein nudE-like 1                           | NDEL1     |
| Not defined | sp    | Q9GZN2  | TGIF2_HUMAN   | Homeobox protein TGIF2                                             | TGIF2     |
| Not defined | sp    | Q9GZN8  | CTO27_HUMAN   | UPF0687 protein C20orf27                                           | C20orf27  |
| Not defined | sp    | Q9GZP8  | IIMUP_HUMAN   | Immortalization up-regulated protein                               | IIMUP     |
| Not defined | sp    | Q9GZQ8  | MPL3B_HUMAN   | Microtubule-associated proteins 1A/1B light chain 3B               | MAP1LC3B  |
| Not defined | sp    | Q9GZR2  | REXO4_HUMAN   | RNA exonuclease 4                                                  | REXO4     |
| Not defined | sp    | Q9GZR7  | DDX24_HUMAN   | ATP-dependent RNA helicase DDX24                                   | DDX24     |
| Not defined | sp    | Q9GZT6  | CC90B_HUMAN   | Coiled-coil domain-containing protein 90B, mitochondrial           | CCDC90B   |
| Not defined | sp    | Q9GZT9  | EGLN1_HUMAN   | Egl nine homolog 1                                                 | EGLN1     |
| Not defined | sp    | Q9GZU8  | PIP30_HUMAN   | PSME3-interacting protein                                          | PSME3IP1  |
| Not defined | sp    | Q9GZV5  | WWTR1_HUMAN   | WW domain-containing transcription regulator protein 1             | WWTR1     |
| Not defined | sp    | Q9GZX9  | TWSG1_HUMAN   | Twisted gastrulation protein homolog 1                             | TWSG1     |
| Not defined | sp    | Q9GZY4  | COA1_HUMAN    | Cytochrome c oxidase assembly factor 1 homolog                     | COA1      |
| Not defined | sp    | Q9GZY8  | IMFF_HUMAN    | Mitochondrial fission factor                                       | IMFF      |
| Not defined | sp    | Q9GZZ1  | NAA50_HUMAN   | N-alpha-acetyltransferase 50                                       | NAA50     |
| Not defined | sp    | Q9GZZ9  | UBA5_HUMAN    | Ubiquitin-like modifier-activating enzyme 5                        | UBA5      |
| Not defined | sp    | Q9H008  | LHPP_HUMAN    | Phospholysine phosphohistidine inorganic pyrophosphate phosphatase | LHPP      |
| Not defined | sp    | Q9H063  | MAF1_HUMAN    | Repressor of RNA polymerase III transcription MAF1 homolog         | MAF1      |
| Not defined | sp    | Q9H074  | PAIP1_HUMAN   | Polyadenylate-binding protein-interacting protein 1                | PAIP1     |
| Not defined | sp    | Q9H089  | LSG1_HUMAN    | Large subunit GTPase 1 homolog                                     | LSG1      |
| Not defined | sp    | Q9H098  | FAM107B_HUMAN | Protein FAM107B                                                    | FAM107B   |
| Not defined | sp    | Q9H0A0  | NAT10_HUMAN   | RNA cytidine acetyltransferase                                     | NAT10     |
| Not defined | sp    | Q9H0C2  | ADT4_HUMAN    | ADP/ATP translocase 4                                              | SLC25A31  |
| Not defined | sp    | Q9H0C8  | ILKAP_HUMAN   | Integrin-linked kinase-associated serine/threonine phosphatase 2C  | ILKAP     |
| Not defined | sp    | Q9H0E2  | TOLIP_HUMAN   | Toll-interacting protein                                           | TOLLIP    |
| Not defined | sp    | Q9H0E3  | SP130_HUMAN   | Histone deacetylase complex subunit SAP130                         | SAP130    |
| Not defined | sp    | Q9H0G5  | NSRP1_HUMAN   | Nuclear speckle splicing regulatory protein 1                      | NSRP1     |
| Not defined | sp    | Q9H0H0  | INT2_HUMAN    | Integrator complex subunit 2                                       | INTS2     |
| Not defined | sp    | Q9H0H5  | RGAP1_HUMAN   | Rac GTPase-activating protein 1                                    | RACGAP1   |
| Not defined | sp    | Q9H0I9  | TKTL2_HUMAN   | Transketolase-like protein 2                                       | TKTL2     |
| Not defined | sp    | Q9H0I4  | QRIC2_HUMAN   | Glutamine-rich protein 2                                           | QRIC2     |
| Not defined | sp    | Q9H0M4  | ZCPW1_HUMAN   | Zinc finger CW-type PWWP domain protein 1                          | ZCWPW1    |
| Not defined | sp    | Q9H0N0  | RAB6C_HUMAN   | Ras-related protein Rab-6C                                         | RAB6C     |
| Not defined | sp    | Q9H0N5  | PHS2_HUMAN    | Pterin-4-alpha-carbinolamine dehydratase 2                         | PCBD2     |
| Not defined | sp    | Q9H0R3  | TM222_HUMAN   | Transmembrane protein 222                                          | TMEM222   |
| Not defined | sp    | Q9H0R4  | HDHD2_HUMAN   | Haloacid dehalogenase-like hydrolase domain-containing protein 2   | HDHD2     |
| Not defined | sp    | Q9H0R8  | GBRL1_HUMAN   | Gamma-aminobutyric acid receptor-associated protein-like 1         | GABARAPL1 |
| Not defined | sp    | Q9H0S4  | DDX47_HUMAN   | Probable ATP-dependent RNA helicase DDX47                          | DDX47     |
| Not defined | sp    | Q9H0U6  | RM18_HUMAN    | 39S ribosomal protein L18, mitochondrial                           | MRPL18    |

Supplementary Table 2.xlsx

| Cluster     | class | UNIPROT | UNIPROT_ID  | Description                                                                    | GN       |
|-------------|-------|---------|-------------|--------------------------------------------------------------------------------|----------|
| Not defined | sp    | Q9H0V9  | LMA2L_HUMAN | VIP36-like protein                                                             | LMAN2L   |
| Not defined | sp    | Q9H0W9  | CKO54_HUMAN | Ester hydrolase C11orf54                                                       | C11orf54 |
| Not defined | sp    | Q9H0X4  | F234A_HUMAN | Protein FAM234A                                                                | FAM234A  |
| Not defined | sp    | Q9H0Z9  | RBM38_HUMAN | RNA-binding protein 38                                                         | RBM38    |
| Not defined | sp    | Q9H115  | SNAB_HUMAN  | Beta-soluble NSF attachment protein                                            | NAPB     |
| Not defined | sp    | Q9H116  | GZF1_HUMAN  | GDNF-inducible zinc finger protein 1                                           | GZF1     |
| Not defined | sp    | Q9H169  | STMN4_HUMAN | Stathmin-4                                                                     | STMN4    |
| Not defined | sp    | Q9H173  | SIL1_HUMAN  | Nucleotide exchange factor SIL1                                                | SIL1     |
| Not defined | sp    | Q9H1B7  | I2BPL_HUMAN | Probable E3 ubiquitin-protein ligase IRF2BPL                                   | IRF2BPL  |
| Not defined | sp    | Q9H1C7  | CYTM1_HUMAN | Cysteine-rich and transmembrane domain-containing protein 1                    | CYTM1    |
| Not defined | sp    | Q9H1D9  | RPC6_HUMAN  | DNA-directed RNA polymerase III subunit RPC6                                   | POLR3F   |
| Not defined | sp    | Q9H1E3  | NUCKS_HUMAN | Nuclear ubiquitous casein and cyclin-dependent kinase substrate 1              | NUCKS1   |
| Not defined | sp    | Q9H1E5  | TMX4_HUMAN  | Thioredoxin-related transmembrane protein 4                                    | TMX4     |
| Not defined | sp    | Q9H1H9  | K113A_HUMAN | Kinesin-like protein KIF13A                                                    | KIF13A   |
| Not defined | sp    | Q9H1J7  | WNT5B_HUMAN | Protein Wnt-5b                                                                 | WNT5B    |
| Not defined | sp    | Q9H1K0  | RBN55_HUMAN | Rabenosyn-5                                                                    | RBSN     |
| Not defined | sp    | Q9H1K1  | ISCU_HUMAN  | Iron-sulfur cluster assembly enzyme ISCU, mitochondrial                        | ISCU     |
| Not defined | sp    | Q9H1K4  | GHC2_HUMAN  | Mitochondrial glutamate carrier 2                                              | SLC25A18 |
| Not defined | sp    | Q9H1P3  | OSBL2_HUMAN | Oxysterol-binding protein-related protein 2                                    | OSBPL2   |
| Not defined | sp    | Q9H1R3  | MYLK2_HUMAN | Myosin light chain kinase 2, skeletal/cardiac muscle                           | MYLK2    |
| Not defined | sp    | Q9H1Y3  | OPN3_HUMAN  | Opsin-3                                                                        | OPN3     |
| Not defined | sp    | Q9H1Z4  | WDR13_HUMAN | WD repeat-containing protein 13                                                | WDR13    |
| Not defined | sp    | Q9H201  | EPN3_HUMAN  | Epsin-3                                                                        | EPN3     |
| Not defined | sp    | Q9H204  | MED28_HUMAN | Mediator of RNA polymerase II transcription subunit 28                         | MED28    |
| Not defined | sp    | Q9H223  | EHD4_HUMAN  | EH domain-containing protein 4                                                 | EHD4     |
| Not defined | sp    | Q9H227  | GBA3_HUMAN  | Cytosolic beta-glucosidase                                                     | GBA3     |
| Not defined | sp    | Q9H251  | CAD23_HUMAN | Cadherin-23                                                                    | CDH23    |
| Not defined | sp    | Q9H254  | SPTN4_HUMAN | Spectrin beta chain, non-erythrocytic 4                                        | SPTBN4   |
| Not defined | sp    | Q9H257  | CARD9_HUMAN | Caspase recruitment domain-containing protein 9                                | CARD9    |
| Not defined | sp    | Q9H269  | VPS16_HUMAN | Vacuolar protein sorting-associated protein 16 homolog                         | VPS16    |
| Not defined | sp    | Q9H2B2  | SYT4_HUMAN  | Synaptotagmin-4                                                                | SYT4     |
| Not defined | sp    | Q9H2C0  | GAN_HUMAN   | Gigaxonin                                                                      | GAN      |
| Not defined | sp    | Q9H2D6  | TARA_HUMAN  | TRIO and F-actin-binding protein                                               | TRIOBP   |
| Not defined | sp    | Q9H2F3  | 3BH57_HUMAN | 3 beta-hydroxysteroid dehydrogenase type 7                                     | HSD3B7   |
| Not defined | sp    | Q9H2G2  | SLK_HUMAN   | STE20-like serine/threonine-protein kinase                                     | SLK      |
| Not defined | sp    | Q9H2G4  | TSYL2_HUMAN | Testis-specific Y-encoded-like protein 2                                       | TSPYL2   |
| Not defined | sp    | Q9H2H9  | S38A1_HUMAN | Sodium-coupled neutral amino acid transporter 1                                | SLC38A1  |
| Not defined | sp    | Q9H2J4  | PDCL3_HUMAN | Phosducin-like protein 3                                                       | PDCL3    |
| Not defined | sp    | Q9H2J7  | S6A15_HUMAN | Sodium-dependent neutral amino acid transporter B(0)AT2                        | SLCGA15  |
| Not defined | sp    | Q9H2K0  | IF3M_HUMAN  | Translation initiation factor IF-3, mitochondrial                              | MTIF3    |
| Not defined | sp    | Q9H2P0  | ADNP_HUMAN  | Activity-dependent neuroprotector homeobox protein                             | ADNP     |
| Not defined | sp    | Q9H2P9  | DPH5_HUMAN  | Diphthine methyl ester synthase                                                | DPH5     |
| Not defined | sp    | Q9H2U1  | DHX36_HUMAN | ATP-dependent DNA/RNA helicase DHX36                                           | DHX36    |
| Not defined | sp    | Q9H2U9  | ADAM7_HUMAN | Disintegrin and metalloproteinase domain-containing protein 7                  | ADAM7    |
| Not defined | sp    | Q9H2X8  | I27L2_HUMAN | Interferon alpha-inducible protein 27-like protein 2                           | IFI27L2  |
| Not defined | sp    | Q9H2X9  | S12A5_HUMAN | Solute carrier family 12 member 5                                              | SLC12A5  |
| Not defined | sp    | Q9H2Y7  | ZN106_HUMAN | Zinc finger protein 106                                                        | ZNF106   |
| Not defined | sp    | Q9H313  | TTYH1_HUMAN | Protein twenty homolog 1                                                       | TTYH1    |
| Not defined | sp    | Q9H3D4  | P63_HUMAN   | Tumor protein 63                                                               | TP63     |
| Not defined | sp    | Q9H3F6  | BACD3_HUMAN | BTB/POZ domain-containing adapter for CUL3-mediated RhoA degradation protein 3 | KCTD10   |
| Not defined | sp    | Q9H3H9  | TCAL2_HUMAN | Transcription elongation factor A protein-like 2                               | TCEAL2   |
| Not defined | sp    | Q9H3K2  | GHITM_HUMAN | Growth hormone-inducible transmembrane protein                                 | GHITM    |
| Not defined | sp    | Q9H3Q1  | BORG4_HUMAN | Cdc42 effector protein 4                                                       | CDC42EP4 |
| Not defined | sp    | Q9H3R1  | NDST4_HUMAN | Bifunctional heparan sulfate N-deacetylase/N-sulfotransferase 4                | NDST4    |
| Not defined | sp    | Q9H3R5  | CENPH_HUMAN | Centromere protein H                                                           | CENPH    |
| Not defined | sp    | Q9H3S5  | PIGM_HUMAN  | GPI mannosyltransferase 1                                                      | PIGM     |
| Not defined | sp    | Q9H3Y6  | SRMS_HUMAN  | Tyrosine-protein kinase Srms                                                   | SRMS     |
| Not defined | sp    | Q9H446  | RWDD1_HUMAN | RWD domain-containing protein 1                                                | RWDD1    |
| Not defined | sp    | Q9H467  | CUED2_HUMAN | CUE domain-containing protein 2                                                | CUEDC2   |
| Not defined | sp    | Q9H477  | RBSK_HUMAN  | Ribokinase                                                                     | RBKS     |
| Not defined | sp    | Q9H479  | FN3K_HUMAN  | Fructosamine-3-kinase                                                          | FN3K     |
| Not defined | sp    | Q9H488  | OFUT1_HUMAN | GDP-fucose protein O-fucosyltransferase 1                                      | POFUT1   |
| Not defined | sp    | Q9H492  | MLP3A_HUMAN | Microtubule-associated fucosins 1A/1B light chain 3A                           | MAP1LC3A |
| Not defined | sp    | Q9H4A3  | WNK1_HUMAN  | Serine/threonine-protein kinase WNK1                                           | WNK1     |
| Not defined | sp    | Q9H4A4  | AMPB_HUMAN  | Amino-peptidase B                                                              | RNPEP    |
| Not defined | sp    | Q9H4A5  | GLP3L_HUMAN | Golgi phosphoprotein 3-like                                                    | GOLPH3L  |
| Not defined | sp    | Q9H4A6  | GOLP3_HUMAN | Golgi phosphoprotein 3                                                         | GOLPH3   |
| Not defined | sp    | Q9H4G0  | E41L1_HUMAN | Band 4.1-like protein 1                                                        | EPB41L1  |
| Not defined | sp    | Q9H4G4  | GAPR1_HUMAN | Golgi-associated plant pathogenesis-related protein 1                          | GLIPR2   |
| Not defined | sp    | Q9H4I3  | TRABD_HUMAN | TraB domain-containing protein                                                 | TRABD    |
| Not defined | sp    | Q9H4I9  | EMRE_HUMAN  | Essential MCU regulator, mitochondrial                                         | SMDT1    |
| Not defined | sp    | Q9H4L5  | OSBL3_HUMAN | Oxysterol-binding protein-related protein 3                                    | OSBPL3   |
| Not defined | sp    | Q9H4M7  | PKHA4_HUMAN | Pleckstrin homology domain-containing family A member 4                        | PLEKHA4  |
| Not defined | sp    | Q9H4M9  | EHD1_HUMAN  | EH domain-containing protein 1                                                 | EHD1     |
| Not defined | sp    | Q9H4Q4  | PRD12_HUMAN | PR domain zinc finger protein 12                                               | PRDM12   |
| Not defined | sp    | Q9H4T2  | ZSC16_HUMAN | Zinc finger and SCAN domain-containing protein 16                              | ZSCAN16  |
| Not defined | sp    | Q9H501  | ESF1_HUMAN  | ESF1 homolog                                                                   | ESF1     |
| Not defined | sp    | Q9H511  | KLH31_HUMAN | Kelch-like protein 31                                                          | KLHL31   |
| Not defined | sp    | Q9H579  | MROH8_HUMAN | Protein MROH8                                                                  | MROH8    |
| Not defined | sp    | Q9H583  | HEAT1_HUMAN | HEAT repeat-containing protein 1                                               | HEATR1   |
| Not defined | sp    | Q9H598  | VIAAT_HUMAN | Vesicular inhibitory amino acid transporter                                    | SLC32A1  |
| Not defined | sp    | Q9H5H4  | ZN768_HUMAN | Zinc finger protein 768                                                        | ZN768    |
| Not defined | sp    | Q9H5I5  | PIE22_HUMAN | Piezo-type mechanosensitive ion channel component 2                            | PIEZO2   |
| Not defined | sp    | Q9H5K3  | SG196_HUMAN | Protein O-mannose kinase                                                       | POMK     |
| Not defined | sp    | Q9H5V9  | CXO56_HUMAN | UPF0428 protein CXorf56                                                        | CXorf56  |
| Not defined | sp    | Q9H5X1  | CIA2A_HUMAN | Cytosolic iron-sulfur assembly component 2A                                    | CIAO2A   |
| Not defined | sp    | Q9H5Y7  | SLIK6_HUMAN | SLIT and NTRK-like protein 6                                                   | SLITRK6  |
| Not defined | sp    | Q9H649  | NSUN3_HUMAN | tRNA (cytosine(34)-C(5))-methyltransferase, mitochondrial                      | NSUN3    |
| Not defined | sp    | Q9H694  | BICC1_HUMAN | Protein bicaudal C homolog 1                                                   | BICC1    |
| Not defined | sp    | Q9H6E4  | CC134_HUMAN | Coiled-coil domain-containing protein 134                                      | CCDC134  |

Supplementary Table 2.xlsx

| Cluster     | class | UNIPROT | UNIPROT_ID   | Description                                                                    | GN        |
|-------------|-------|---------|--------------|--------------------------------------------------------------------------------|-----------|
| Not defined | sp    | Q9H6F5  | CCD86_HUMAN  | Coiled-coil domain-containing protein 86                                       | CCDC86    |
| Not defined | sp    | Q9H6J7  | CKO49_HUMAN  | UPF0705 protein C11orf49                                                       | C11orf49  |
| Not defined | sp    | Q9H6K5  | PRR36_HUMAN  | Proline-rich protein 36                                                        | PRR36     |
| Not defined | sp    | Q9H6N6  | MYH16_HUMAN  | Putative uncharacterized protein MYH16                                         | MYH16     |
| Not defined | sp    | Q9H6P5  | TASP1_HUMAN  | Threonine aspartase 1                                                          | TASP1     |
| Not defined | sp    | Q9H6R4  | NOL6_HUMAN   | Nucleolar protein 6                                                            | NOL6      |
| Not defined | sp    | Q9H6S0  | YTHDC2_HUMAN | 3'-5' RNA helicase YTHDC2                                                      | YTHDC2    |
| Not defined | sp    | Q9H6T0  | ESRP2_HUMAN  | Epithelial splicing regulatory protein 2                                       | ESRP2     |
| Not defined | sp    | Q9H6T3  | RPAP3_HUMAN  | RNA polymerase II-associated protein 3                                         | RPAP3     |
| Not defined | sp    | Q9H6Y2  | WDR55_HUMAN  | WD repeat-containing protein 55                                                | WDR55     |
| Not defined | sp    | Q9H6Y7  | RN167_HUMAN  | E3 ubiquitin-protein ligase RNF167                                             | RNF167    |
| Not defined | sp    | Q9H6Z4  | RANBP3_HUMAN | Ran-binding protein 3                                                          | RANBP3    |
| Not defined | sp    | Q9H707  | ZN552_HUMAN  | Zinc finger protein 552                                                        | ZN552     |
| Not defined | sp    | Q9H777  | RN21_HUMAN   | Zinc phosphodiesterase ELAC protein 1                                          | ELAC1     |
| Not defined | sp    | Q9H788  | SH24A_HUMAN  | SH2 domain-containing protein 4A                                               | SH24A     |
| Not defined | sp    | Q9H799  | CPLN1_HUMAN  | Ciliogenesis and planar polarity effector 1                                    | CPLANE1   |
| Not defined | sp    | Q9H7C9  | AAMDC_HUMAN  | Mth938 domain-containing protein                                               | AAMDC     |
| Not defined | sp    | Q9H7D0  | DOCK5_HUMAN  | Dedicator of cytokinesis protein 5                                             | DOCK5     |
| Not defined | sp    | Q9H7D7  | WDR26_HUMAN  | WD repeat-containing protein 26                                                | WDR26     |
| Not defined | sp    | Q9H7M9  | VISTA_HUMAN  | V-type immunoglobulin domain-containing suppressor of T-cell activation        | V5IR      |
| Not defined | sp    | Q9H7N4  | SFR19_HUMAN  | Splicing factor, arginine/serine-rich 19                                       | SCPF1     |
| Not defined | sp    | Q9H814  | PHAX_HUMAN   | Phosphorylated adapter RNA export protein                                      | PHAX      |
| Not defined | sp    | Q9H832  | UBE2Z_HUMAN  | Ubiquitin-conjugating enzyme E2 Z                                              | UBE2Z     |
| Not defined | sp    | Q9H840  | GEM17_HUMAN  | Gem-associated protein 7                                                       | GEMIN7    |
| Not defined | sp    | Q9H845  | ACAD9_HUMAN  | Complex I assembly factor ACAD9, mitochondrial                                 | ACAD9     |
| Not defined | sp    | Q9H867  | MT21D_HUMAN  | Protein-lysine methyltransferase METTL21D                                      | PCPKMT    |
| Not defined | sp    | Q9H869  | YYAP1_HUMAN  | YY1-associated protein 1                                                       | YY1AP1    |
| Not defined | sp    | Q9H875  | PKRI1_HUMAN  | PRKR-interacting protein 1                                                     | PRKRIP1   |
| Not defined | sp    | Q9H892  | TTC12_HUMAN  | Tetratricopeptide repeat protein 12                                            | TTC12     |
| Not defined | sp    | Q9H8L6  | MMRN2_HUMAN  | Multimerin-2                                                                   | MMRN2     |
| Not defined | sp    | Q9H8M5  | CNNM2_HUMAN  | Metal transporter CNNM2                                                        | CNNM2     |
| Not defined | sp    | Q9H8M7  | MINDY3_HUMAN | Ubiquitin carboxyl-terminal hydrolase MINDY-3                                  | MINDY3    |
| Not defined | sp    | Q9H8S9  | MOB1A_HUMAN  | MOB kinase activator 1A                                                        | MOB1A     |
| Not defined | sp    | Q9H8W4  | PKHF2_HUMAN  | Pleckstrin homology domain-containing family F member 2                        | PLEKHF2   |
| Not defined | sp    | Q9H8Y5  | ANK21_HUMAN  | Ankyrin repeat and zinc finger domain-containing protein 1                     | ANK2F1    |
| Not defined | sp    | Q9H903  | MTD2L_HUMAN  | Probable bifunctional methylenetetrahydrofolate dehydrogenase/cyclohydrolase 2 | MTHFD2L   |
| Not defined | sp    | Q9H920  | RN121_HUMAN  | RING finger protein 121                                                        | RNF121    |
| Not defined | sp    | Q9H930  | SP14L_HUMAN  | Nuclear body protein SP140-like protein                                        | SP140L    |
| Not defined | sp    | Q9H936  | GHC1_HUMAN   | Mitochondrial glutamate carrier 1                                              | SLC25A22  |
| Not defined | sp    | Q9H944  | MED20_HUMAN  | Mediator of RNA polymerase II transcription subunit 20                         | MED20     |
| Not defined | sp    | Q9H974  | QTRT2_HUMAN  | Queuine tRNA-ribosyltransferase accessory subunit 2                            | QTRT2     |
| Not defined | sp    | Q9H977  | WDR54_HUMAN  | WD repeat-containing protein 54                                                | WDR54     |
| Not defined | sp    | Q9H992  | MARH7_HUMAN  | E3 ubiquitin-protein ligase MARCHF7                                            | MARCHF7   |
| Not defined | sp    | Q9H9A6  | LRC40_HUMAN  | Leucine-rich repeat-containing protein 40                                      | LRRC40    |
| Not defined | sp    | Q9H9B1  | EHMT1_HUMAN  | Histone-lysine N-methyltransferase EHMT1                                       | EHMT1     |
| Not defined | sp    | Q9H9B4  | SFXN1_HUMAN  | Sideroflexin-1                                                                 | SFXN1     |
| Not defined | sp    | Q9H9F9  | ARP5_HUMAN   | Actin-related protein 5                                                        | ACTR5     |
| Not defined | sp    | Q9H9G7  | AGO3_HUMAN   | Protein argonaute-3                                                            | AGO3      |
| Not defined | sp    | Q9H9P8  | L2HGDH_HUMAN | L-2-hydroxyglutarate dehydrogenase, mitochondrial                              | L2HGDH    |
| Not defined | sp    | Q9H9Q2  | CSN7B_HUMAN  | COP9 signalosome complex subunit 7b                                            | COPS7B    |
| Not defined | sp    | Q9H9R9  | DBND1_HUMAN  | Dysbindin domain-containing protein 1                                          | DBNDD1    |
| Not defined | sp    | Q9H9S4  | CB39L_HUMAN  | Calcium-binding protein 39-like                                                | CAB39L    |
| Not defined | sp    | Q9H9S5  | FKRP_HUMAN   | Fukutin-related protein                                                        | FKRP      |
| Not defined | sp    | Q9HA64  | KT3K_HUMAN   | Ketosamine-3-kinase                                                            | FN3KRP    |
| Not defined | sp    | Q9HA77  | SYCM_HUMAN   | Probable cysteine-tRNA ligase, mitochondrial                                   | CARS2     |
| Not defined | sp    | Q9HAB8  | PPCS_HUMAN   | Phosphopantothenate-cysteine ligase                                            | PPCS      |
| Not defined | sp    | Q9HAF1  | EAF6_HUMAN   | Chromatin modification-related protein MEAF6                                   | MEAF6     |
| Not defined | sp    | Q9HAH7  | FBRS_HUMAN   | Probable fibrosin-1                                                            | FBRS      |
| Not defined | sp    | Q9HAN9  | NMNAT1_HUMAN | Nicotinamide/nicotinic acid mononucleotide adenylyltransferase 1               | NMNAT1    |
| Not defined | sp    | Q9HAP6  | LIN7B_HUMAN  | Protein lin-7 homolog B                                                        | LIN7B     |
| Not defined | sp    | Q9HAR2  | AGRL3_HUMAN  | Adhesion G protein-coupled receptor L3                                         | ADGRL3    |
| Not defined | sp    | Q9HAS0  | NJMU_HUMAN   | Protein Njmu-R1                                                                | C11orf75  |
| Not defined | sp    | Q9HAT2  | SIAE_HUMAN   | Sialate O-acetyltransferase                                                    | SIAE      |
| Not defined | sp    | Q9HAU5  | RENT2_HUMAN  | Regulator of nonsense transcripts 2                                            | UPF2      |
| Not defined | sp    | Q9HAU6  | TCTP8_HUMAN  | Putative translationally-controlled tumor protein-like protein TPT1P8          | TPT1P8    |
| Not defined | tr    | Q9HB66  | Q9HB66_HUMAN | Alternative protein MKKS                                                       | MKKS      |
| Not defined | sp    | Q9HB96  | FANCE_HUMAN  | Fanconi anemia group E protein                                                 | FANCE     |
| Not defined | sp    | Q9HBH0  | RHOF_HUMAN   | Rho-related GTP-binding protein RhoF                                           | RHOF      |
| Not defined | sp    | Q9HBH1  | DEFM_HUMAN   | Peptide deformylase, mitochondrial                                             | PDF       |
| Not defined | sp    | Q9HBH5  | RDH14_HUMAN  | Retinol dehydrogenase 14                                                       | RDH14     |
| Not defined | sp    | Q9HB11  | PARVB_HUMAN  | Beta-parvin                                                                    | PARVB     |
| Not defined | sp    | Q9HBL7  | PLRKT_HUMAN  | Plasminogen receptor (KT)                                                      | PLGRKT    |
| Not defined | sp    | Q9HBM1  | SPC25_HUMAN  | Kinetochore protein Spc25                                                      | SPC25     |
| Not defined | sp    | Q9HBM6  | TAF9B_HUMAN  | Transcription initiation factor TFIID subunit 9B                               | TAF9B     |
| Not defined | sp    | Q9HBR0  | S38AA_HUMAN  | Putative sodium-coupled neutral amino acid transporter 10                      | SLC38A10  |
| Not defined | sp    | Q9HBW1  | LRRC4_HUMAN  | Leucine-rich repeat-containing protein 4                                       | LRRC4     |
| Not defined | sp    | Q9HC10  | OTOF_HUMAN   | Otoferlin                                                                      | OTOF      |
| Not defined | sp    | Q9HC16  | ABC3G_HUMAN  | DNA dC->dU-editing enzyme APOBEC-3G                                            | APOBEC3G  |
| Not defined | sp    | Q9HC35  | EMAL4_HUMAN  | Echinoderm microtubule-associated protein-like 4                               | EML4      |
| Not defined | sp    | Q9HC58  | NCKX3_HUMAN  | Sodium/potassium/calcium exchanger 3                                           | SLC24A3   |
| Not defined | sp    | Q9HC84  | MUC5B_HUMAN  | Mucin-5B                                                                       | MUC5B     |
| Not defined | sp    | Q9HC9C  | LST2_HUMAN   | Lateral signaling target protein 2 homolog                                     | ZFYWE28   |
| Not defined | sp    | Q9HC05  | NCOA5_HUMAN  | Nuclear receptor coactivator 5                                                 | NCOA5     |
| Not defined | sp    | Q9HCE5  | MET14_HUMAN  | N6-adenosine-methyltransferase non-catalytic subunit                           | METTL14   |
| Not defined | sp    | Q9HCE6  | ARGAL_HUMAN  | Rho guanine nucleotide exchange factor 10-like protein                         | ARHGEF10L |
| Not defined | sp    | Q9HCF6  | TRPM3_HUMAN  | Transient receptor potential cation channel subfamily M member 3               | TRPM3     |
| Not defined | sp    | Q9HCG7  | GBA2_HUMAN   | Non-lysosomal glucosylceramidase                                               | GBA2      |
| Not defined | sp    | Q9HCH3  | CPNE5_HUMAN  | Copine-5                                                                       | CPNE5     |
| Not defined | sp    | Q9HCI7  | MSL2_HUMAN   | E3 ubiquitin-protein ligase MSL2                                               | MSL2      |
| Not defined | sp    | Q9HCK4  | ROBO2_HUMAN  | Roundabout homolog 2                                                           | ROBO2     |

Supplementary Table 2.xlsx

| Cluster     | class | UNIPROT | UNIPROT_ID   | Description                                                                        | GN        |
|-------------|-------|---------|--------------|------------------------------------------------------------------------------------|-----------|
| Not defined | sp    | Q9HCK5  | AGO4_HUMAN   | Protein argonaute-4                                                                | AGO4      |
| Not defined | sp    | Q9HCM7  | FBLS_HUMAN   | Fibrosin-1-like protein                                                            | FBRS1     |
| Not defined | sp    | Q9HCN4  | GNP1_HUMAN   | GPN-loop GTPase 1                                                                  | GNP1      |
| Not defined | sp    | Q9HCN8  | SDF2L_HUMAN  | Stromal cell-derived factor 2-like protein 1                                       | SDF2L1    |
| Not defined | sp    | Q9HCP0  | KC1G1_HUMAN  | Casein kinase I isoform gamma-1                                                    | CSNK1G1   |
| Not defined | sp    | Q9HCS5  | E41LA_HUMAN  | Band 4.1-like protein 4A                                                           | EPB41L4A  |
| Not defined | sp    | Q9HCU5  | PREB_HUMAN   | Prolactin regulatory element-binding protein                                       | PREB      |
| Not defined | sp    | Q9HCU8  | DPOD4_HUMAN  | DNA polymerase delta subunit 4                                                     | POLD4     |
| Not defined | sp    | Q9HCY8  | S10AE_HUMAN  | Protein S100-A14                                                                   | S100A14   |
| Not defined | sp    | Q9HD15  | SRA1_HUMAN   | Steroid receptor RNA activator 1                                                   | SRA1      |
| Not defined | sp    | Q9HD26  | GOPC_HUMAN   | Golgi-associated PDZ and coiled-coil motif-containing protein                      | GOPC      |
| Not defined | sp    | Q9HD33  | RM47_HUMAN   | 39S ribosomal protein L47, mitochondrial                                           | MRPL47    |
| Not defined | sp    | Q9HD34  | LYRM4_HUMAN  | LYR motif-containing protein 4                                                     | LYRM4     |
| Not defined | sp    | Q9HD40  | SPCS_HUMAN   | O-phosphoserine-tRNA(Sec) selenium transferase                                     | SEPSecs   |
| Not defined | sp    | Q9HD42  | CHM1A_HUMAN  | Charged multivesicular body protein 1a                                             | CHMP1A    |
| Not defined | sp    | Q9HD45  | TM9S3_HUMAN  | Transmembrane 9 superfamily member 3                                               | TM9SF3    |
| Not defined | sp    | Q9HD47  | MOG1_HUMAN   | Ran guanine nucleotide release factor                                              | RANGRF    |
| Not defined | sp    | Q9HD67  | MYO10_HUMAN  | Unconventional myosin-X                                                            | MYO10     |
| Not defined | sp    | Q9NP50  | SHCAF_HUMAN  | SIN3-HDAC complex-associated factor                                                | SINHCAF   |
| Not defined | sp    | Q9NP61  | ARFG3_HUMAN  | ADP-ribosylation factor GTPase-activating protein 3                                | ARFGAP3   |
| Not defined | sp    | Q9NP66  | HM20A_HUMAN  | High mobility group protein 20A                                                    | HMG20A    |
| Not defined | sp    | Q9NP73  | ALG13_HUMAN  | Putative bifunctional UDP-N-acetylglucosamine transferase and deubiquitinase ALG13 | ALG13     |
| Not defined | sp    | Q9NP87  | DPOLM_HUMAN  | DNA-directed DNA/RNA polymerase mu                                                 | POLM      |
| Not defined | sp    | Q9NPA0  | EMC7_HUMAN   | ER membrane protein complex subunit 7                                              | EMC7      |
| Not defined | sp    | Q9NPA2  | MMP25_HUMAN  | Matrix metalloproteinase-25                                                        | MMP25     |
| Not defined | sp    | Q9NPA8  | ENY2_HUMAN   | Transcription and mRNA export factor ENY2                                          | ENY2      |
| Not defined | sp    | Q9NP88  | GPCP1_HUMAN  | Glycerophosphocholine phosphodiesterase GPCPD1                                     | GPCPD1    |
| Not defined | sp    | Q9NP83  | EXOS4_HUMAN  | Exosome complex component RRP41                                                    | EXOSC4    |
| Not defined | sp    | Q9NPD8  | UBE2T_HUMAN  | Ubiquitin-conjugating enzyme E2 T                                                  | UBE2T     |
| Not defined | sp    | Q9NPE2  | NGRN_HUMAN   | Neugrin                                                                            | NGRN      |
| Not defined | sp    | Q9NPE3  | NOP10_HUMAN  | H/ACA ribonucleoprotein complex subunit 3                                          | NOP10     |
| Not defined | sp    | Q9NPF2  | CHSTB_HUMAN  | Carbohydrate sulfotransferase 11                                                   | CHST11    |
| Not defined | sp    | Q9NPF4  | OSGEP_HUMAN  | Probable tRNA N6-adenosine threonylcarbamoyltransferase                            | OSGEP     |
| Not defined | sp    | Q9NPF5  | DMAP1_HUMAN  | DNA methyltransferase 1-associated protein 1                                       | DMAP1     |
| Not defined | sp    | Q9NPG1  | FZD3_HUMAN   | Frizzled-3                                                                         | FZD3      |
| Not defined | sp    | Q9NPG3  | UBN1_HUMAN   | Ubinuclein-1                                                                       | UBN1      |
| Not defined | sp    | Q9NPG4  | PCD12_HUMAN  | Protocadherin-12                                                                   | PCDH12    |
| Not defined | sp    | Q9NPH0  | PPA6_HUMAN   | Lysophosphatidic acid phosphatase type 6                                           | ACP6      |
| Not defined | sp    | Q9NPH3  | IL1AP_HUMAN  | Interleukin-1 receptor accessory protein                                           | IL1RAP    |
| Not defined | sp    | Q9NPH9  | IL26_HUMAN   | Interleukin-26                                                                     | IL26      |
| Not defined | sp    | Q9NP16  | DCP1A_HUMAN  | mRNA-decapping enzyme 1A                                                           | DCP1A     |
| Not defined | sp    | Q9NP19  | KCNJ16_HUMAN | Inward rectifier potassium channel 16                                              | KCNJ16    |
| Not defined | sp    | Q9NP16  | MED4_HUMAN   | Mediator of RNA polymerase II transcription subunit 4                              | MED4      |
| Not defined | sp    | Q9NP18  | NXT2_HUMAN   | NTF2-related export protein 2                                                      | NXT2      |
| Not defined | sp    | Q9NP18  | TIMDC1_HUMAN | Complex I assembly factor TIMMDC1, mitochondrial                                   | TIMMDC1   |
| Not defined | sp    | Q9NP25  | B3GA2_HUMAN  | Galactosylgalactosylxylosylprotein 3-beta-glucuronosyltransferase 2                | B3GAT2    |
| Not defined | sp    | Q9NQ32  | CKO16_HUMAN  | Uncharacterized protein C11orf16                                                   | C11orf16  |
| Not defined | sp    | Q9NQ34  | TMM9B_HUMAN  | Transmembrane protein 9B                                                           | TMM9B     |
| Not defined | sp    | Q9NQ55  | SSF1_HUMAN   | Suppressor of SWI4 1 homolog                                                       | PPAN      |
| Not defined | sp    | Q9NQ75  | CASS4_HUMAN  | Cas scaffolding protein family member 4                                            | CASS4     |
| Not defined | sp    | Q9NQ84  | GPC5C_HUMAN  | G-protein coupled receptor family C group 5 member C                               | GPC5C     |
| Not defined | sp    | Q9NQA3  | WASH6_HUMAN  | WAS protein family homolog 6                                                       | WASH6P    |
| Not defined | sp    | Q9NQA5  | TRPV5_HUMAN  | Transient receptor potential cation channel subfamily V member 5                   | TRPV5     |
| Not defined | sp    | Q9NQE9  | HINT3_HUMAN  | Histidine triad nucleotide-binding protein 3                                       | HINT3     |
| Not defined | sp    | Q9NQG5  | RPR1B_HUMAN  | Regulation of nuclear pre-mRNA domain-containing protein 1B                        | RPR1B     |
| Not defined | sp    | Q9NQR1  | KMT5A_HUMAN  | N-lysine methyltransferase KMT5A                                                   | KMT5A     |
| Not defined | sp    | Q9NQR7  | CC177_HUMAN  | Coiled-coil domain-containing protein 177                                          | CCDC177   |
| Not defined | sp    | Q9NQS3  | NECT3_HUMAN  | Nectin-3                                                                           | NECTIN3   |
| Not defined | sp    | Q9NQS7  | INCE_HUMAN   | Inner centromere protein                                                           | INCENP    |
| Not defined | sp    | Q9NQT4  | EXOS5_HUMAN  | Exosome complex component RRP46                                                    | EXOSC5    |
| Not defined | sp    | Q9NQT5  | EXOS3_HUMAN  | Exosome complex component RRP40                                                    | EXOSC3    |
| Not defined | sp    | Q9NQV5  | PAK6_HUMAN   | Serine/threonine-protein kinase PAK 6                                              | PAK6      |
| Not defined | sp    | Q9NQV5  | PRD11_HUMAN  | PR domain-containing protein 11                                                    | PRDM11    |
| Not defined | sp    | Q9NQV6  | PRD10_HUMAN  | PR domain zinc finger protein 10                                                   | PRDM10    |
| Not defined | sp    | Q9NQW1  | SEC31B_HUMAN | Protein transport protein Sec31B                                                   | SEC31B    |
| Not defined | sp    | Q9NQW6  | ANLN_HUMAN   | Anillin                                                                            | ANLN      |
| Not defined | sp    | Q9NQW7  | XPP1_HUMAN   | Xaa-Pro aminopeptidase 1                                                           | XPNPEP1   |
| Not defined | sp    | Q9NQX1  | PRDM5_HUMAN  | PR domain zinc finger protein 5                                                    | PRDM5     |
| Not defined | sp    | Q9NQX4  | MYO5C_HUMAN  | Unconventional myosin-Vc                                                           | MYO5C     |
| Not defined | sp    | Q9NQY0  | BIN3_HUMAN   | Bridging integrator 3                                                              | BIN3      |
| Not defined | sp    | Q9NQZ2  | SAS10_HUMAN  | Something about silencing protein 10                                               | UTP3      |
| Not defined | sp    | Q9NQZ5  | STAR7_HUMAN  | StAR-related lipid transfer protein 7, mitochondrial                               | STAR7     |
| Not defined | sp    | Q9NR09  | BIRC6_HUMAN  | Baculoviral IAP repeat-containing protein 6                                        | BIRC6     |
| Not defined | sp    | Q9NR12  | PDL17_HUMAN  | PDZ and LIM domain protein 7                                                       | PDLIM7    |
| Not defined | sp    | Q9NR16  | C163B_HUMAN  | Scavenger receptor cysteine-rich type 1 protein M160                               | CD163L1   |
| Not defined | sp    | Q9NR19  | ACSA_HUMAN   | Acetyl-coenzyme A synthetase, cytoplasmic                                          | ACSS2     |
| Not defined | sp    | Q9NR20  | DYRK4_HUMAN  | Dual specificity tyrosine-phosphorylation-regulated kinase 4                       | DYRK4     |
| Not defined | sp    | Q9NR30  | DDX21_HUMAN  | Nucleolar RNA helicase 2                                                           | DDX21     |
| Not defined | sp    | Q9NR33  | DPOE4_HUMAN  | DNA polymerase epsilon subunit 4                                                   | POLE4     |
| Not defined | sp    | Q9NR48  | ASH1L_HUMAN  | Histone-lysine N-methyltransferase ASH1L                                           | ASH1L     |
| Not defined | sp    | Q9NR56  | MBNL1_HUMAN  | Muscleblind-like protein 1                                                         | MBNL1     |
| Not defined | sp    | Q9NR64  | KLHL1_HUMAN  | Kelch-like protein 1                                                               | KLHL1     |
| Not defined | sp    | Q9NR80  | ARHG4_HUMAN  | Rho guanine nucleotide exchange factor 4                                           | ARHGEF4   |
| Not defined | sp    | Q9NRA1  | PDGFC_HUMAN  | Platelet-derived growth factor C                                                   | PDGFC     |
| Not defined | sp    | Q9NRA8  | 4ET_HUMAN    | Eukaryotic translation initiation factor 4E transporter                            | EIF4ENIF1 |
| Not defined | sp    | Q9NRC6  | SPTN5_HUMAN  | Spectrin beta chain, non-erythrocytic 5                                            | SPTBN5    |
| Not defined | sp    | Q9NRC8  | SIRT7_HUMAN  | NAD-dependent protein deacetylase sirtuin-7                                        | SIRT7     |
| Not defined | sp    | Q9NRD1  | FBX6_HUMAN   | F-box only protein 6                                                               | FBXO6     |
| Not defined | sp    | Q9NRD9  | DUOX1_HUMAN  | Dual oxidase 1                                                                     | DUOX1     |
| Not defined | sp    | Q9NRE2  | TSH2_HUMAN   | Teashirt homolog 2                                                                 | TSH2      |

Supplementary Table 2.xlsx

| Cluster     | class | UNIPROT | UNIPROT_ID   | Description                                                               | GN        |
|-------------|-------|---------|--------------|---------------------------------------------------------------------------|-----------|
| Not defined | sp    | Q9NRF9  | DPOE3_HUMAN  | DNA polymerase epsilon subunit 3                                          | POLE3     |
| Not defined | sp    | Q9NRG0  | CHRC1_HUMAN  | Chromatin accessibility complex protein 1                                 | CHRAC1    |
| Not defined | sp    | Q9NRG1  | PRDC1_HUMAN  | Phosphoribosyltransferase domain-containing protein 1                     | PRTFDC1   |
| Not defined | sp    | Q9NRG7  | D39U1_HUMAN  | Epimerase family protein SDR39U1                                          | SDR39U1   |
| Not defined | sp    | Q9NRJ5  | PAPOB_HUMAN  | Poly(A) polymerase beta                                                   | PAPOLB    |
| Not defined | sp    | Q9NRL3  | STRN4_HUMAN  | Striatin-4                                                                | STRN4     |
| Not defined | sp    | Q9NRM1  | ENAM_HUMAN   | Enamelin                                                                  | ENAM      |
| Not defined | sp    | Q9NRN7  | ADPPT_HUMAN  | L-aminoadipate-semialdehyde dehydrogenase-phosphopantetheinyl transferase | AASDHPTT  |
| Not defined | sp    | Q9NRP2  | COXM2_HUMAN  | COX assembly mitochondrial protein 2 homolog                              | CMC2      |
| Not defined | sp    | Q9NRP4  | SDHF3_HUMAN  | Succinate dehydrogenase assembly factor 3, mitochondrial                  | SDHAF3    |
| Not defined | sp    | Q9NRR3  | C42S2_HUMAN  | CDC42 small effector protein 2                                            | CDC42SE2  |
| Not defined | sp    | Q9NRR8  | C42S1_HUMAN  | CDC42 small effector protein 1                                            | CDC42SE1  |
| Not defined | sp    | Q9NR56  | SNX15_HUMAN  | Sorting nexin-15                                                          | SNX15     |
| Not defined | sp    | Q9NRW3  | ABC3C_HUMAN  | DNA dC->dU-editing enzyme APOBEC-3C                                       | APOBEC3C  |
| Not defined | sp    | Q9NRX5  | SERC1_HUMAN  | Serine incorporator 1                                                     | SERINC1   |
| Not defined | sp    | Q9NRY2  | SOSSC_HUMAN  | SOSS complex subunit C                                                    | INIP      |
| Not defined | sp    | Q9NRY5  | F1142_HUMAN  | Protein FAM114A2                                                          | FAM114A2  |
| Not defined | sp    | Q9NRY6  | PLS3_HUMAN   | Phospholipid scramblase 3                                                 | PLSCR3    |
| Not defined | sp    | Q9NR29  | HELLS_HUMAN  | Lymphoid-specific helicase                                                | HELLS     |
| Not defined | sp    | Q9NS18  | GLRX2_HUMAN  | Glutaredoxin-2, mitochondrial                                             | GLRX2     |
| Not defined | sp    | Q9NS86  | LANC2_HUMAN  | LanC-like protein 2                                                       | LANCL2    |
| Not defined | sp    | Q9NSA3  | CNBP1_HUMAN  | Beta-catenin-interacting protein 1                                        | CTNNBP1   |
| Not defined | sp    | Q9NSC5  | HOMER3_HUMAN | Homer protein homolog 3                                                   | HOMER3    |
| Not defined | sp    | Q9NSD9  | SYFB_HUMAN   | Phenylalanine-tRNA ligase beta subunit                                    | FARS5     |
| Not defined | sp    | Q9NSE4  | SYIM_HUMAN   | Isoleucine-tRNA ligase, mitochondrial                                     | IARS2     |
| Not defined | sp    | Q9NSI2  | F207A_HUMAN  | Protein FAM207A                                                           | FAM207A   |
| Not defined | sp    | Q9NSK7  | CS012_HUMAN  | Protein C19orf12                                                          | C19orf12  |
| Not defined | sp    | Q9NSV2  | STAR5_HUMAN  | STAR-related lipid transfer protein 5                                     | STAR5     |
| Not defined | sp    | Q9NT62  | ATG3_HUMAN   | Ubiquitin-like-conjugating enzyme ATG3                                    | ATG3      |
| Not defined | sp    | Q9NT67  | SIR3_HUMAN   | NAD-dependent protein deacetylase sirtuin-3, mitochondrial                | SIRT3     |
| Not defined | sp    | Q9NT12  | AT8A2_HUMAN  | Phospholipid-transporting ATPase IB                                       | ATP8A2    |
| Not defined | sp    | Q9NTJ3  | SMC4_HUMAN   | Structural maintenance of chromosomes protein 4                           | SMC4      |
| Not defined | sp    | Q9NTJ4  | MA2C1_HUMAN  | Alpha-mannosidase 2C1                                                     | MAN2C1    |
| Not defined | sp    | Q9NTJ5  | SAC1_HUMAN   | Phosphatidylinositol phosphatase SAC1                                     | SACM1L    |
| Not defined | sp    | Q9NTM9  | CUTC_HUMAN   | Copper homeostasis protein cutC homolog                                   | CUTC      |
| Not defined | sp    | Q9NTN9  | SEM4G_HUMAN  | Semaphorin-4G                                                             | SEMA4G    |
| Not defined | sp    | Q9NTZ6  | RBM12_HUMAN  | RNA-binding protein 12                                                    | RBM12     |
| Not defined | sp    | Q9NU22  | MDN1_HUMAN   | Midasin                                                                   | MDN1      |
| Not defined | sp    | Q9NU23  | LYRM2_HUMAN  | LYR motif-containing protein 2                                            | LYRM2     |
| Not defined | sp    | Q9NUC0  | SRTD4_HUMAN  | SERTA domain-containing protein 4                                         | SERTAD4   |
| Not defined | sp    | Q9NUG6  | PDRG1_HUMAN  | p53 and DNA damage-regulated protein 1                                    | PDRG1     |
| Not defined | sp    | Q9NU11  | DECR2_HUMAN  | Peroxisomal 2,4-dienoyl-CoA reductase                                     | DECR2     |
| Not defined | sp    | Q9NU11  | ABHDA_HUMAN  | Mycophenolic acid acyl-glucuronide esterase, mitochondrial                | ABHD10    |
| Not defined | sp    | Q9NUK0  | MBNL3_HUMAN  | Muscleblind-like protein 3                                                | MBNL3     |
| Not defined | sp    | Q9NUL5  | SHFL_HUMAN   | Shiftless antiviral inhibitor of ribosomal frameshifting protein          | SHFL      |
| Not defined | sp    | Q9NUN5  | LMBD1_HUMAN  | Probable lysosomal cobalamin transporter                                  | LMBRD1    |
| Not defined | sp    | Q9NUO3  | TXLNG_HUMAN  | Gamma-taxilin                                                             | TXLNG     |
| Not defined | sp    | Q9NUO6  | SPS2L_HUMAN  | SPATS2-like protein                                                       | SPATS2L   |
| Not defined | sp    | Q9NUU7  | DD19A_HUMAN  | ATP-dependent RNA helicase DDX19A                                         | DDX19A    |
| Not defined | sp    | Q9NUW8  | TYDP1_HUMAN  | Tyrosyl-DNA phosphodiesterase 1                                           | TDP1      |
| Not defined | sp    | Q9NUX5  | POTE1_HUMAN  | Protection of telomeres protein 1                                         | POT1      |
| Not defined | sp    | Q9NV06  | DCA13_HUMAN  | DDB1- and CUL4-associated factor 13                                       | DCAF13    |
| Not defined | sp    | Q9NV31  | IMP3_HUMAN   | U3 small nucleolar ribonucleoprotein protein IMP3                         | IMP3      |
| Not defined | sp    | Q9NV35  | NUD15_HUMAN  | Nucleotide triphosphate diphosphatase NUDT15                              | NUDT15    |
| Not defined | sp    | Q9NV56  | MIRGBP_HUMAN | MIRG/MORF4L-binding protein                                               | MIRGBP    |
| Not defined | sp    | Q9NV70  | EXOC1_HUMAN  | Exocyst complex component 1                                               | EXOC1     |
| Not defined | sp    | Q9NV96  | CC50A_HUMAN  | Cell cycle control protein 50A                                            | TMEM30A   |
| Not defined | sp    | Q9NVA1  | UQCQ1_HUMAN  | Ubiquinol-cytochrome-c reductase complex assembly factor 1                | UQCQ1     |
| Not defined | sp    | Q9NVD3  | SETD4_HUMAN  | SET domain-containing protein 4                                           | SETD4     |
| Not defined | sp    | Q9NVD7  | PARVA_HUMAN  | Alpha-parvin                                                              | PARVA     |
| Not defined | sp    | Q9NVE7  | PANK4_HUMAN  | 4'-phosphopantetheine phosphatase                                         | PANK4     |
| Not defined | sp    | Q9NVH1  | DJC11_HUMAN  | DnaI homolog subfamily C member 11                                        | DNAJC11   |
| Not defined | sp    | Q9NVH6  | TMLH_HUMAN   | Trimethyllysine dioxygenase, mitochondrial                                | TMLHE     |
| Not defined | sp    | Q9NV17  | ATD3A_HUMAN  | ATPase family AAA domain-containing protein 3A                            | ATAD3A    |
| Not defined | sp    | Q9NVM1  | EVA1B_HUMAN  | Protein eva-1 homolog B                                                   | EVA1B     |
| Not defined | sp    | Q9NVM6  | DJC17_HUMAN  | DnaI homolog subfamily C member 17                                        | DNAJC17   |
| Not defined | sp    | Q9NVM9  | INT13_HUMAN  | Integrator complex subunit 13                                             | INTS13    |
| Not defined | sp    | Q9NVP2  | ASF1B_HUMAN  | Histone chaperone ASF1B                                                   | ASF1B     |
| Not defined | sp    | Q9NVQ4  | FAIM1_HUMAN  | Fas apoptotic inhibitory molecule 1                                       | FAIM      |
| Not defined | sp    | Q9NVR7  | TBCC1_HUMAN  | TBCC domain-containing protein 1                                          | TBCCD1    |
| Not defined | sp    | Q9NVS2  | RT18A_HUMAN  | 39S ribosomal protein S18a, mitochondrial                                 | MRPS18A   |
| Not defined | sp    | Q9NVS9  | PNPO_HUMAN   | Pyridoxine-5'-phosphate oxidase                                           | PNPO      |
| Not defined | sp    | Q9NVU0  | RPC5_HUMAN   | DNA-directed RNA polymerase III subunit RPC5                              | POLR3E    |
| Not defined | sp    | Q9NVX2  | NLE1_HUMAN   | Notchless protein homolog 1                                               | NLE1      |
| Not defined | sp    | Q9NW13  | RBM28_HUMAN  | RNA-binding protein 28                                                    | RBM28     |
| Not defined | sp    | Q9NW68  | BSDC1_HUMAN  | BSD domain-containing protein 1                                           | BSDC1     |
| Not defined | sp    | Q9NW82  | WDR70_HUMAN  | WD repeat-containing protein 70                                           | WDR70     |
| Not defined | sp    | Q9NWA0  | MED9_HUMAN   | Mediator of RNA polymerase II transcription subunit 9                     | MED9      |
| Not defined | sp    | Q9NWB6  | ARGL1_HUMAN  | Arginine and glutamate-rich protein 1                                     | ARGLU1    |
| Not defined | sp    | Q9NWD8  | TM248_HUMAN  | Transmembrane protein 248                                                 | TMEM248   |
| Not defined | sp    | Q9NWH9  | SLTM_HUMAN   | SAFB-like transcription modulator                                         | SLTM      |
| Not defined | sp    | Q9NWM8  | FKBP14_HUMAN | Peptidyl-prolyl cis-trans isomerase FKBP14                                | FKBP14    |
| Not defined | sp    | Q9NWN3  | FBX34_HUMAN  | F-box only protein 34                                                     | FBXO34    |
| Not defined | sp    | Q9NWO9  | CN119_HUMAN  | Uncharacterized protein C14orf119                                         | C14orf119 |
| Not defined | sp    | Q9NWS0  | PIHD1_HUMAN  | PIH1 domain-containing protein 1                                          | PIHD1     |
| Not defined | sp    | Q9NWS1  | PARI_HUMAN   | PCNA-interacting partner                                                  | PARBP     |
| Not defined | sp    | Q9NWS8  | RMND1_HUMAN  | Required for meiotic nuclear division protein 1 homolog                   | RMND1     |
| Not defined | sp    | Q9NWT1  | PK1IP_HUMAN  | p21-activated protein kinase-interacting protein 1                        | PAK1IP1   |
| Not defined | sp    | Q9NWT6  | HIF1N_HUMAN  | Hypoxia-inducible factor 1-alpha inhibitor                                | HIF1AN    |
| Not defined | sp    | Q9NWU1  | OXSM_HUMAN   | 3-oxoacyl-[acyl-carrier-protein] synthase, mitochondrial                  | OXSM      |

Supplementary Table 2.xlsx

| Cluster     | class | UNIPROT | UNIPROT_ID   | Description                                                                 | GN        |
|-------------|-------|---------|--------------|-----------------------------------------------------------------------------|-----------|
| Not defined | sp    | Q9NWX2  | GID8_HUMAN   | Glucose-induced degradation protein 8 homolog                               | GID8      |
| Not defined | sp    | Q9NWX5  | RM22_HUMAN   | 39S ribosomal protein L22, mitochondrial                                    | MRPL22    |
| Not defined | sp    | Q9NWX8  | BABA1_HUMAN  | BRIS and BRCA1-A complex member 1                                           | BABAM1    |
| Not defined | sp    | Q9NWX6  | NRK1_HUMAN   | Nicotinamide riboside kinase 1                                              | NMRK1     |
| Not defined | sp    | Q9NWX6  | THG1_HUMAN   | Probable tRNA(His) guanylyltransferase                                      | THG1L     |
| Not defined | sp    | Q9NX00  | TM160_HUMAN  | Transmembrane protein 160                                                   | TMEM160   |
| Not defined | sp    | Q9NX02  | NALP2_HUMAN  | NACHT, LRR and PYD domains-containing protein 2                             | NLRP2     |
| Not defined | sp    | Q9NX04  | CA109_HUMAN  | Uncharacterized protein C1orf109                                            | C1orf109  |
| Not defined | sp    | Q9NX08  | COMD8_HUMAN  | COMM domain-containing protein 8                                            | COMMD8    |
| Not defined | sp    | Q9NX18  | SDHF2_HUMAN  | Succinate dehydrogenase assembly factor 2, mitochondrial                    | SDHAF2    |
| Not defined | sp    | Q9NX20  | RM16_HUMAN   | 39S ribosomal protein L16, mitochondrial                                    | MRPL16    |
| Not defined | sp    | Q9NX24  | NHP2_HUMAN   | H/ACA ribonucleoprotein complex subunit 2                                   | NHP2      |
| Not defined | sp    | Q9NX46  | ADPRS_HUMAN  | ADP-ribose glycohydrolase ARH3                                              | ADPRS     |
| Not defined | sp    | Q9NX57  | RAB20_HUMAN  | Ras-related protein Rab-20                                                  | RAB20     |
| Not defined | sp    | Q9NX58  | LYAR_HUMAN   | Cell growth-regulating nucleolar protein                                    | LYAR      |
| Not defined | sp    | Q9NX62  | IMPA3_HUMAN  | Golgi-resident adenosine 3',5'-bisphosphate 3'-phosphatase                  | IMPAD1    |
| Not defined | sp    | Q9NX63  | MIC19_HUMAN  | MICOS complex subunit MIC19                                                 | CHCHD3    |
| Not defined | sp    | Q9NX70  | MED29_HUMAN  | Mediator of RNA polymerase II transcription subunit 29                      | MED29     |
| Not defined | sp    | Q9NX74  | DUS2L_HUMAN  | tRNA-dihydrouridine(20) synthase [NAD(P)+]-like                             | DUS2      |
| Not defined | sp    | Q9NX76  | CKLF6_HUMAN  | CKLF-like MARVEL transmembrane domain-containing protein 6                  | CMITM6    |
| Not defined | sp    | Q9NXA8  | SIRS5_HUMAN  | NAD-dependent protein deacetylase sirtuin-5, mitochondrial                  | SIRT5     |
| Not defined | sp    | Q9NXG2  | THUM1_HUMAN  | THUMP domain-containing protein 1                                           | THUMPD1   |
| Not defined | sp    | Q9NXG6  | P4HTM_HUMAN  | Transmembrane prolyl 4-hydroxylase                                          | P4HTM     |
| Not defined | sp    | Q9NXH9  | TRM1_HUMAN   | tRNA [guanine(26)-N(2)]-dimethyltransferase                                 | TRMT1     |
| Not defined | sp    | Q9NXL2  | ARH38_HUMAN  | Rho guanine nucleotide exchange factor 38                                   | ARHGEF38  |
| Not defined | sp    | Q9NXL6  | SIDT1_HUMAN  | SID1 transmembrane family member 1                                          | SIDT1     |
| Not defined | sp    | Q9NXR1  | NDE1_HUMAN   | Nuclear distribution protein nudE homolog 1                                 | NDE1      |
| Not defined | sp    | Q9NXR7  | BABA2_HUMAN  | BRIS and BRCA1-A complex member 2                                           | BABAM2    |
| Not defined | sp    | Q9NY27  | PP4R2_HUMAN  | Serine/threonine-protein phosphatase 4 regulatory subunit 2                 | PPP4R2    |
| Not defined | sp    | Q9NY28  | GALT8_HUMAN  | Probable polypeptide N-acetylglucosaminyltransferase 8                      | GALNT8    |
| Not defined | sp    | Q9NY33  | DPP3_HUMAN   | Dipeptidyl peptidase 3                                                      | DPP3      |
| Not defined | sp    | Q9NY35  | CLDN1_HUMAN  | Claudin domain-containing protein 1                                         | CLDN1     |
| Not defined | sp    | Q9NY61  | AATF_HUMAN   | Protein AATF                                                                | AATF      |
| Not defined | sp    | Q9NY80  | TE2IP_HUMAN  | Telomeric repeat-binding factor 2-interacting protein 1                     | TERF2IP   |
| Not defined | sp    | Q9NYB9  | ABI2_HUMAN   | Abl interactor 2                                                            | ABI2      |
| Not defined | sp    | Q9NYC9  | DYH9_HUMAN   | Dynein heavy chain 9, axonemal                                              | DNAH9     |
| Not defined | sp    | Q9NYK1  | TLR7_HUMAN   | Toll-like receptor 7                                                        | TLR7      |
| Not defined | sp    | Q9NYL4  | FKB11_HUMAN  | Peptidyl-prolyl cis-trans isomerase FKBP11                                  | FKBP11    |
| Not defined | sp    | Q9NYM9  | BET1L_HUMAN  | BET1-like protein                                                           | BET1L     |
| Not defined | sp    | Q9NYU1  | UGGG2_HUMAN  | UDP-glucose:glycoprotein glucosyltransferase 2                              | UGGT2     |
| Not defined | sp    | Q9NYU2  | UGGG1_HUMAN  | UDP-glucose:glycoprotein glucosyltransferase 1                              | UGGT1     |
| Not defined | sp    | Q9NYV4  | CDK12_HUMAN  | Cyclin-dependent kinase 12                                                  | CDK12     |
| Not defined | sp    | Q9NZ32  | ARP10_HUMAN  | Actin-related protein 10                                                    | ACTR10    |
| Not defined | sp    | Q9NZ43  | USE1_HUMAN   | Vesicle transport protein USE1                                              | USE1      |
| Not defined | sp    | Q9NZ45  | CISD1_HUMAN  | CDGSH iron-sulfur domain-containing protein 1                               | CISD1     |
| Not defined | sp    | Q9NZ53  | PDXL2_HUMAN  | Podocalyxin-like protein 2                                                  | PODXL2    |
| Not defined | sp    | Q9NZ56  | FMN2_HUMAN   | Formin-2                                                                    | FMN2      |
| Not defined | sp    | Q9NZ63  | TLN1_HUMAN   | Telomere length and silencing protein 1 homolog                             | C9orf78   |
| Not defined | sp    | Q9NZ72  | STMN3_HUMAN  | Stathmin-3                                                                  | STMN3     |
| Not defined | sp    | Q9NZC3  | GDE1_HUMAN   | Glycerophosphodiester phosphodiesterase 1                                   | GDE1      |
| Not defined | sp    | Q9NZD8  | SPG21_HUMAN  | Masparin                                                                    | SPG21     |
| Not defined | sp    | Q9NZE8  | RM35_HUMAN   | 39S ribosomal protein L35, mitochondrial                                    | MRPL35    |
| Not defined | sp    | Q9NZG7  | NINJ2_HUMAN  | Ninjurin-2                                                                  | NINJ2     |
| Not defined | sp    | Q9NZI7  | UBP1_HUMAN   | Upstream-binding protein 1                                                  | UBP1      |
| Not defined | sp    | Q9NZJ4  | SACS_HUMAN   | Sacsin                                                                      | SACS      |
| Not defined | sp    | Q9NZJ6  | COQ3_HUMAN   | Ubiquinone biosynthesis O-methyltransferase, mitochondrial                  | COQ3      |
| Not defined | sp    | Q9NZJ7  | MTCH1_HUMAN  | Mitochondrial carrier homolog 1                                             | MTCH1     |
| Not defined | sp    | Q9NZJ9  | NUDT4_HUMAN  | Diphosphoinositol polyphosphate phosphohydrolase 2                          | NUDT4     |
| Not defined | sp    | Q9NZL4  | HPBP1_HUMAN  | Hsp70-binding protein 1                                                     | HSPBP1    |
| Not defined | sp    | Q9NZM4  | BICRA_HUMAN  | BRD4-interacting chromatin-remodeling complex-associated protein            | BICRA     |
| Not defined | sp    | Q9NZV5  | NOP53_HUMAN  | Ribosome biogenesis protein NOP53                                           | NOP53     |
| Not defined | sp    | Q9NZN3  | EHD3_HUMAN   | EH domain-containing protein 3                                              | EHD3      |
| Not defined | sp    | Q9NZN4  | EHD2_HUMAN   | EH domain-containing protein 2                                              | EHD2      |
| Not defined | sp    | Q9NZN8  | CNOT2_HUMAN  | CCR4-NOT transcription complex subunit 2                                    | CNOT2     |
| Not defined | sp    | Q9NZP2  | OR6C2_HUMAN  | Olfactory receptor 6C2                                                      | OR6C2     |
| Not defined | sp    | Q9NZR2  | LRP1B_HUMAN  | Low-density lipoprotein receptor-related protein 1B                         | LRP1B     |
| Not defined | sp    | Q9NZT2  | OGFR_HUMAN   | Opioid growth factor receptor                                               | OGFR      |
| Not defined | sp    | Q9NZW5  | MPP6_HUMAN   | MAGUK p55 subfamily member 6                                                | MPP6      |
| Not defined | sp    | Q9P013  | CWC15_HUMAN  | Spliceosome-associated protein CWC15 homolog                                | CWC15     |
| Not defined | sp    | Q9P016  | THYN1_HUMAN  | Thymocyte nuclear protein 1                                                 | THYN1     |
| Not defined | sp    | Q9P031  | TAP26_HUMAN  | Thyroid transcription factor 1-associated protein 26                        | CCDC59    |
| Not defined | sp    | Q9P032  | NDUF4_HUMAN  | NADH dehydrogenase [ubiquinone] 1 alpha subcomplex assembly factor 4        | NDUFAP4   |
| Not defined | sp    | Q9P035  | HACD3_HUMAN  | Very-long-chain (3R)-3-hydroxyacyl-CoA dehydratase 3                        | HACD3     |
| Not defined | sp    | Q9P086  | MED11_HUMAN  | Mediator of RNA polymerase II transcription subunit 11                      | MED11     |
| Not defined | sp    | Q9P086  | CC167_HUMAN  | Coiled-coil domain-containing protein 167                                   | CCDC167   |
| Not defined | sp    | Q9P0J1  | PDP1_HUMAN   | [Pyruvate dehydrogenase (acetyl-transferring)]-phosphatase 1, mitochondrial | PDP1      |
| Not defined | sp    | Q9P0K7  | RAI14_HUMAN  | Ankycorbins                                                                 | RAI14     |
| Not defined | sp    | Q9P0M6  | H2AW_HUMAN   | Core histone macro-H2A.2                                                    | MACROH2A2 |
| Not defined | sp    | Q9P0M9  | RM27_HUMAN   | 39S ribosomal protein L27, mitochondrial                                    | MRPL27    |
| Not defined | sp    | Q9P0P0  | RNF181_HUMAN | E3 ubiquitin-protein ligase RNF181                                          | RNF181    |
| Not defined | sp    | Q9P0P8  | MRES1_HUMAN  | Mitochondrial transcription rescue factor 1                                 | MRES1     |
| Not defined | sp    | Q9P0R6  | GSKIP_HUMAN  | GSKIP-interacting protein                                                   | GSKIP     |
| Not defined | sp    | Q9P0S2  | COX16_HUMAN  | Cytochrome c oxidase assembly protein COX16 homolog, mitochondrial          | COX16     |
| Not defined | sp    | Q9P0T7  | TMEM9_HUMAN  | Transmembrane protein 9                                                     | TMEM9     |
| Not defined | sp    | Q9P0U1  | TOM7_HUMAN   | Mitochondrial import receptor subunit TOM7 homolog                          | TOMM7     |
| Not defined | sp    | Q9P0V9  | SEP10_HUMAN  | Septin-10                                                                   | SEPTIN10  |
| Not defined | sp    | Q9P107  | GMIP_HUMAN   | GEM-interacting protein                                                     | GMIP      |
| Not defined | sp    | Q9P1A6  | DLGP2_HUMAN  | Disks large-associated protein 2                                            | DLGAP2    |
| Not defined | sp    | Q9P1F3  | ABRAL_HUMAN  | Costars family protein ABRACL                                               | ABRACL    |
| Not defined | sp    | Q9P1U1  | ARP3B_HUMAN  | Actin-related protein 3B                                                    | ACTR3B    |



Supplementary Table 2.xlsx

| Cluster     | class | UNIPROT | UNIPROT_ID   | Description                                                                 | GN       |
|-------------|-------|---------|--------------|-----------------------------------------------------------------------------|----------|
| Not defined | sp    | Q9P1Y6  | PHRF1_HUMAN  | PHD and RING finger domain-containing protein 1                             | PHRF1    |
| Not defined | sp    | Q9P1Z0  | ZBTB4_HUMAN  | Zinc finger and BTB domain-containing protein 4                             | ZBTB4    |
| Not defined | sp    | Q9P1Z2  | CACO1_HUMAN  | Calcium-binding and coiled-coil domain-containing protein 1                 | CALCOCO1 |
| Not defined | sp    | Q9P206  | K1522_HUMAN  | Uncharacterized protein KIAA1522                                            | KIAA1522 |
| Not defined | sp    | Q9P219  | DAPLE_HUMAN  | Protein Daple                                                               | CCDC88C  |
| Not defined | sp    | Q9P225  | DYH2_HUMAN   | Dynein heavy chain 2, axonemal                                              | DNAH2    |
| Not defined | sp    | Q9P246  | STIM2_HUMAN  | Stromal interaction molecule 2                                              | STIM2    |
| Not defined | sp    | Q9P289  | STK26_HUMAN  | Serine/threonine-protein kinase 26                                          | STK26    |
| Not defined | sp    | Q9P2B2  | FPRP_HUMAN   | Prostaglandin F2 receptor negative regulator                                | PTGFRN   |
| Not defined | sp    | Q9P2D0  | IBTK_HUMAN   | Inhibitor of Bruton tyrosine kinase                                         | IBTK     |
| Not defined | sp    | Q9P2D7  | DYH1_HUMAN   | Dynein heavy chain 1, axonemal                                              | DNAH1    |
| Not defined | sp    | Q9P2F8  | SI1L2_HUMAN  | Signal-induced proliferation-associated 1-like protein 2                    | SIPA1L2  |
| Not defined | sp    | Q9P2G3  | KLH14_HUMAN  | Kelch-like protein 14                                                       | KLHL14   |
| Not defined | sp    | Q9P2G9  | KLHL8_HUMAN  | Kelch-like protein 8                                                        | KLHL8    |
| Not defined | sp    | Q9P2I0  | CPSF2_HUMAN  | Cleavage and polyadenylation specificity factor subunit 2                   | CPSF2    |
| Not defined | sp    | Q9P2J5  | SYLC_HUMAN   | Leucine-tRNA ligase, cytoplasmic                                            | LARS1    |
| Not defined | sp    | Q9P2J9  | PDP2_HUMAN   | [Pyruvate dehydrogenase [acetyl-transferring]]-phosphatase 2, mitochondrial | PDP2     |
| Not defined | sp    | Q9P2K2  | TXD16_HUMAN  | Thioredoxin domain-containing protein 16                                    | TXNDC16  |
| Not defined | sp    | Q9P2K5  | MYEF2_HUMAN  | Myelin expression factor 2                                                  | MYEF2    |
| Not defined | sp    | Q9P2L0  | WDR35_HUMAN  | WD repeat-containing protein 35                                             | WDR35    |
| Not defined | sp    | Q9P2N4  | ATS9_HUMAN   | A disintegrin and metalloproteinase with thrombospondin motifs 9            | ADAMTS9  |
| Not defined | sp    | Q9P2N5  | RBM27_HUMAN  | RNA-binding protein 27                                                      | RBM27    |
| Not defined | sp    | Q9P2P1  | NYNRI_HUMAN  | Protein NYNRIN                                                              | NYNRIN   |
| Not defined | sp    | Q9P2P6  | STAR9_HUMAN  | StAR-related lipid transfer protein 9                                       | STARD9   |
| Not defined | sp    | Q9P2Q2  | FRM4A_HUMAN  | FERM domain-containing protein 4A                                           | FRMD4A   |
| Not defined | sp    | Q9P2R7  | SUCB1_HUMAN  | Succinate-CoA ligase [ADP-forming] subunit beta, mitochondrial              | SUCLA2   |
| Not defined | sp    | Q9P2S6  | ANKY1_HUMAN  | Ankyrin repeat and MYND domain-containing protein 1                         | ANKMY1   |
| Not defined | sp    | Q9P2X0  | DPM3_HUMAN   | Dolichol-phosphate mannosyltransferase subunit 3                            | DPM3     |
| Not defined | sp    | Q9P2Y4  | ZN219_HUMAN  | Zinc finger protein 219                                                     | ZNF219   |
| Not defined | sp    | Q9UBB4  | ATX10_HUMAN  | Ataxin-10                                                                   | ATXN10   |
| Not defined | sp    | Q9UBC2  | EP15R_HUMAN  | Epidermal growth factor receptor substrate 15-like 1                        | EP515L1  |
| Not defined | sp    | Q9UBC5  | MYO1A_HUMAN  | Unconventional myosin-1a                                                    | MYO1A    |
| Not defined | sp    | Q9UBF1  | MAGC2_HUMAN  | Melanoma-associated antigen C2                                              | MAGEC2   |
| Not defined | sp    | Q9UBF2  | COPG2_HUMAN  | Coatomer subunit gamma-2                                                    | COPG2    |
| Not defined | sp    | Q9UBF8  | PI4KB_HUMAN  | Phosphatidylinositol 4-kinase beta                                          | PI4KB    |
| Not defined | sp    | Q9UBG0  | MRC2_HUMAN   | C-type mannose receptor 2                                                   | MRC2     |
| Not defined | sp    | Q9UBI1  | COMM3_HUMAN  | COMM domain-containing protein 3                                            | COMM3    |
| Not defined | sp    | Q9UBI4  | STML1_HUMAN  | Stomatin-like protein 1                                                     | STOML1   |
| Not defined | sp    | Q9UBK2  | PRGC1_HUMAN  | Peroxisome proliferator-activated receptor gamma coactivator 1-alpha        | PPARGC1A |
| Not defined | sp    | Q9UBK8  | MTRR_HUMAN   | Methionine synthase reductase                                               | MTRR     |
| Not defined | sp    | Q9UBL3  | ASH2L_HUMAN  | Set1/Ash2 histone methyltransferase complex subunit ASH2                    | ASH2L    |
| Not defined | sp    | Q9UBL6  | CPNE7_HUMAN  | Copine-7                                                                    | CPNE7    |
| Not defined | sp    | Q9UBN4  | TRPC4_HUMAN  | Short transient receptor potential channel 4                                | TRPC4    |
| Not defined | sp    | Q9UBN7  | HDAC6_HUMAN  | Histone deacetylase 6                                                       | HDAC6    |
| Not defined | sp    | Q9UBQ5  | EIF3K_HUMAN  | Eukaryotic translation initiation factor 3 subunit K                        | EIF3K    |
| Not defined | sp    | Q9UBQ6  | EXTL2_HUMAN  | Exostosin-like 2                                                            | EXTL2    |
| Not defined | sp    | Q9UBS8  | RNF14_HUMAN  | E3 ubiquitin-protein ligase RNF14                                           | RNF14    |
| Not defined | sp    | Q9UBT2  | SAE2_HUMAN   | SUMO-activating enzyme subunit 2                                            | UBA2     |
| Not defined | sp    | Q9UBT6  | POLK_HUMAN   | DNA polymerase kappa                                                        | POLK     |
| Not defined | sp    | Q9UBU8  | MO4L1_HUMAN  | Mortality factor 4-like protein 1                                           | MORF4L1  |
| Not defined | sp    | Q9UBU9  | NXF1_HUMAN   | Nuclear RNA export factor 1                                                 | NXF1     |
| Not defined | sp    | Q9UBV2  | SEL1L_HUMAN  | Protein sel-1 homolog 1                                                     | SEL1L    |
| Not defined | sp    | Q9UBV8  | PEF1_HUMAN   | Peflin                                                                      | PEF1     |
| Not defined | sp    | Q9UBX3  | DIC_HUMAN    | Mitochondrial dicarboxylate carrier                                         | SLC25A10 |
| Not defined | sp    | Q9UDT6  | CLIP2_HUMAN  | CAP-Gly domain-containing linker protein 2                                  | CLIP2    |
| Not defined | sp    | Q9UEW1  | QCR9_HUMAN   | Cytochrome b-c1 complex subunit 9                                           | UCQR10   |
| Not defined | sp    | Q9UDX3  | S14L4_HUMAN  | SEC14-like protein 4                                                        | SEC14L4  |
| Not defined | sp    | Q9UDX4  | S14L3_HUMAN  | SEC14-like protein 3                                                        | SEC14L3  |
| Not defined | sp    | Q9UDY2  | ZO2_HUMAN    | Tight junction protein ZO-2                                                 | TJP2     |
| Not defined | sp    | Q9UEE9  | CFDP1_HUMAN  | Craniofacial development protein 1                                          | CFDP1    |
| Not defined | sp    | Q9UEU0  | VT11B_HUMAN  | Vesicle transport through interaction with t-SNAREs homolog 1B              | VT11B    |
| Not defined | sp    | Q9UEU5  | GGE2D_HUMAN  | G antigen 2D                                                                | GAGE2D   |
| Not defined | sp    | Q9UEW8  | STK39_HUMAN  | STE20/SPS1-related proline-alanine-rich protein kinase                      | STK39    |
| Not defined | sp    | Q9UEY8  | ADDG_HUMAN   | Gamma-adducin                                                               | ADD3     |
| Not defined | sp    | Q9UF33  | EPHA6_HUMAN  | Ephrin type-A receptor 6                                                    | EPHA6    |
| Not defined | sp    | Q9UFP1  | GAK1A_HUMAN  | Golgi-associated kinase 1A                                                  | GASK1A   |
| Not defined | sp    | Q9UFW8  | CGBP1_HUMAN  | CGG triplet repeat-binding protein 1                                        | CGGBP1   |
| Not defined | sp    | Q9UG63  | ABCF2_HUMAN  | ATP-binding cassette sub-family F member 2                                  | ABCF2    |
| Not defined | sp    | Q9UGM6  | SYWM_HUMAN   | Tryptophan-tRNA ligase, mitochondrial                                       | WARS2    |
| Not defined | sp    | Q9UGP8  | SEC63_HUMAN  | Translocation protein SEC63 homolog                                         | SEC63    |
| Not defined | sp    | Q9UGT4  | SUSD2_HUMAN  | Sushi domain-containing protein 2                                           | SUSD2    |
| Not defined | sp    | Q9UGV2  | NDRG3_HUMAN  | Protein NDRG3                                                               | NDRG3    |
| Not defined | sp    | Q9UGY1  | NOL12_HUMAN  | Nucleolar protein 12                                                        | NOL12    |
| Not defined | sp    | Q9UH65  | SWP70_HUMAN  | Switch-associated protein 70                                                | SWAP70   |
| Not defined | sp    | Q9UHA2  | S18L2_HUMAN  | SS18-like protein 2                                                         | SS18L2   |
| Not defined | sp    | Q9UHA3  | RLP24_HUMAN  | Probable ribosome biogenesis protein RLP24                                  | RLS24D1  |
| Not defined | sp    | Q9UHA4  | LTOR3_HUMAN  | Regulator complex protein LAMTOR3                                           | LAMTOR3  |
| Not defined | sp    | Q9UHB6  | LIMA1_HUMAN  | LIM domain and actin-binding protein 1                                      | LIMA1    |
| Not defined | sp    | Q9UHB7  | AFF4_HUMAN   | AF4/FMR2 family member 4                                                    | AFF4     |
| Not defined | sp    | Q9UHB9  | SRP68_HUMAN  | Signal recognition particle subunit SRP68                                   | SRP68    |
| Not defined | sp    | Q9UHC1  | MLH3_HUMAN   | DNA mismatch repair protein Mlh3                                            | MLH3     |
| Not defined | sp    | Q9UHC3  | ASIC3_HUMAN  | Acid-sensing ion channel 3                                                  | ASIC3    |
| Not defined | sp    | Q9UHE8  | STEAP1_HUMAN | Metalloreductase STEAP1                                                     | STEAP1   |
| Not defined | sp    | Q9UHF1  | EGFL7_HUMAN  | Epidermal growth factor-like protein 7                                      | EGFL7    |
| Not defined | sp    | Q9UHH6  | SHPK_HUMAN   | Sedoheptulokinase                                                           | SHPK     |
| Not defined | sp    | Q9UHK0  | NUFP1_HUMAN  | Nuclear fragile X mental retardation-interacting protein 1                  | NUFIP1   |
| Not defined | sp    | Q9UHK6  | AMACR_HUMAN  | Alpha-methylacyl-CoA racemase                                               | AMACR    |
| Not defined | sp    | Q9UHL0  | DDX25_HUMAN  | ATP-dependent RNA helicase DDX25                                            | DDX25    |
| Not defined | sp    | Q9UHL4  | DPP2_HUMAN   | Dipeptidyl peptidase 2                                                      | DPP2     |
| Not defined | sp    | Q9UHN1  | DPOG2_HUMAN  | DNA polymerase subunit gamma-2, mitochondrial                               | POLG2    |

Supplementary Table 2.xlsx

| Cluster     | class | UNIPROT | UNIPROT_ID   | Description                                                                 | GN        |
|-------------|-------|---------|--------------|-----------------------------------------------------------------------------|-----------|
| Not defined | sp    | Q9UHQ9  | NBSR1_HUMAN  | NADH-cytochrome b5 reductase 1                                              | CYB5R1    |
| Not defined | sp    | Q9UHR4  | BI2L1_HUMAN  | Brain-specific angiogenesis inhibitor 1-associated protein 2-like protein 1 | BAIAP2L1  |
| Not defined | sp    | Q9UHR5  | S30BP_HUMAN  | SAP30-binding protein                                                       | SAP30BP   |
| Not defined | sp    | Q9UHX3  | AGRE2_HUMAN  | Adhesion G protein-coupled receptor E2                                      | ADGRE2    |
| Not defined | sp    | Q9UHY1  | NRBP_HUMAN   | Nuclear receptor-binding protein                                            | NRBP1     |
| Not defined | sp    | Q9UHY7  | ENOPH_HUMAN  | Enolase-phosphatase E1                                                      | ENOPH1    |
| Not defined | sp    | Q9UI08  | EVL_HUMAN    | Ena/VASP-like protein                                                       | EVL       |
| Not defined | sp    | Q9UI09  | NDUAC_HUMAN  | NADH dehydrogenase [ubiquinone] 1 alpha subcomplex subunit 12               | NDUFA12   |
| Not defined | sp    | Q9UI14  | PRAF1_HUMAN  | Prenylated Rab acceptor protein 1                                           | RABAC1    |
| Not defined | sp    | Q9UI42  | CBPA4_HUMAN  | Carboxypeptidase A4                                                         | CPA4      |
| Not defined | sp    | Q9UI47  | CTNA3_HUMAN  | Catenin alpha-3                                                             | CTNNA3    |
| Not defined | sp    | Q9UIC8  | LCMT1_HUMAN  | Leucine carboxyl methyltransferase 1                                        | LCMT1     |
| Not defined | sp    | Q9UIF7  | MUTYH_HUMAN  | Adenine DNA glycosylase                                                     | MUTYH     |
| Not defined | sp    | Q9UIF8  | BAZ2B_HUMAN  | Bromodomain adjacent to zinc finger domain protein 2B                       | BAZ2B     |
| Not defined | sp    | Q9UII2  | ATIF1_HUMAN  | ATPase inhibitor, mitochondrial                                             | ATP5IF1   |
| Not defined | sp    | Q9UIJ7  | KAD3_HUMAN   | GTP:AMP phosphotransferase AK3, mitochondrial                               | AK3       |
| Not defined | sp    | Q9UIK4  | DAPK2_HUMAN  | Death-associated protein kinase 2                                           | DAPK2     |
| Not defined | sp    | Q9UIL1  | SCOC_HUMAN   | Short coiled-coil protein                                                   | SCOC      |
| Not defined | sp    | Q9UIQ6  | LCAP_HUMAN   | Leucyl-cystinyl aminopeptidase                                              | LNPEP     |
| Not defined | sp    | Q9UIX4  | KCNGB1_HUMAN | Potassium voltage-gated channel subfamily G member 1                        | KCNGB1    |
| Not defined | sp    | Q9UIJ04 | TSYL4_HUMAN  | Testis-specific Y-encoded-like protein 4                                    | TSPYL4    |
| Not defined | sp    | Q9UIJ68 | MSRA_HUMAN   | Mitochondrial peptide methionine sulfoxide reductase                        | MSRA      |
| Not defined | sp    | Q9UIJ70 | NAGK_HUMAN   | N-acetyl-D-glucosamine kinase                                               | NAGK      |
| Not defined | sp    | Q9UIJ72 | ANX10_HUMAN  | Annexin A10                                                                 | ANXA10    |
| Not defined | sp    | Q9UIJ83 | HACL1_HUMAN  | Z-hydroxyacyl-CoA lyase 1                                                   | HACL1     |
| Not defined | sp    | Q9UIJ85 | TRM6_HUMAN   | tRNA (adenine(58)-N(1))-methyltransferase non-catalytic subunit TRM6        | TRMT6     |
| Not defined | sp    | Q9UIJ99 | ENPP5_HUMAN  | Ectonucleotide pyrophosphatase/phosphodiesterase family member 5            | ENPP5     |
| Not defined | sp    | Q9UIJ05 | SH3L2_HUMAN  | SH3 domain-binding glutamic acid-rich-like protein 2                        | SH3BGL2   |
| Not defined | sp    | Q9UIJ07 | GNPTG_HUMAN  | N-acetylglucosamine-1-phosphotransferase subunit gamma                      | GNPTG     |
| Not defined | sp    | Q9UIJ07 | SCP2D_HUMAN  | SCP2 sterol-binding domain-containing protein 1                             | SCP2D1    |
| Not defined | sp    | Q9UIJ50 | CMC2_HUMAN   | Calcium-binding mitochondrial carrier protein Aralar2                       | SLC25A13  |
| Not defined | sp    | Q9UIJ08 | PURG_HUMAN   | Purine-rich element-binding protein gamma                                   | PURG      |
| Not defined | sp    | Q9UIJ09 | DDX41_HUMAN  | Probable ATP-dependent RNA helicase DDX41                                   | DDX41     |
| Not defined | sp    | Q9UIJ00 | DCTN4_HUMAN  | Dynactin subunit 4                                                          | DCTN4     |
| Not defined | sp    | Q9UIJ05 | GGA1_HUMAN   | ADP-ribosylation factor-binding protein GGA1                                | GGA1      |
| Not defined | sp    | Q9UIK12 | ZN222_HUMAN  | Zinc finger protein 222                                                     | ZNF222    |
| Not defined | sp    | Q9UIK13 | ZN221_HUMAN  | Zinc finger protein 221                                                     | ZNF221    |
| Not defined | sp    | Q9UIK22 | FBX2_HUMAN   | F-box only protein 2                                                        | FBX02     |
| Not defined | sp    | Q9UIK23 | NAGPA_HUMAN  | N-acetylglucosamine-1-phosphodiester alpha-N-acetylglucosaminidase          | NAGPA     |
| Not defined | sp    | Q9UIK41 | VPS28_HUMAN  | Vacuolar protein sorting-associated protein 28 homolog                      | VPS28     |
| Not defined | sp    | Q9UIK53 | ING1_HUMAN   | Inhibitor of growth protein 1                                               | ING1      |
| Not defined | sp    | Q9UIK59 | DBR1_HUMAN   | Lariat debranching enzyme                                                   | DBR1      |
| Not defined | sp    | Q9UIK80 | UBP21_HUMAN  | Ubiquitin carboxyl-terminal hydrolase 21                                    | USP21     |
| Not defined | sp    | Q9UIK97 | FBX9_HUMAN   | F-box only protein 9                                                        | FBX09     |
| Not defined | sp    | Q9UIK99 | FBX3_HUMAN   | F-box only protein 3                                                        | FBX03     |
| Not defined | sp    | Q9UIK02 | MRT4_HUMAN   | mRNA turnover protein 4 homolog                                             | MRT04     |
| Not defined | sp    | Q9UIK06 | CPSF3_HUMAN  | Cleavage and polyadenylation specificity factor subunit 3                   | CPSF3     |
| Not defined | sp    | Q9UIK69 | OCTC_HUMAN   | Peroxisomal carnitine O-octanoyltransferase                                 | CROT      |
| Not defined | sp    | Q9UIK12 | BORG2_HUMAN  | Cdc42 effector protein 3                                                    | CDC42EP3  |
| Not defined | sp    | Q9UIK19 | PO2F3_HUMAN  | POU domain, class 2, transcription factor 3                                 | POU2F3    |
| Not defined | sp    | Q9UIK03 | GPTC8_HUMAN  | G patch domain-containing protein 8                                         | GPATCH8   |
| Not defined | sp    | Q9UIK06 | NXT1_HUMAN   | NTF2-related export protein 1                                               | NXT1      |
| Not defined | sp    | Q9UIK00 | RCOR1_HUMAN  | REST corepressor 1                                                          | RCOR1     |
| Not defined | sp    | Q9UIK13 | C8AP2_HUMAN  | CASP8-associated protein 2                                                  | CASP8AP2  |
| Not defined | sp    | Q9UIK07 | IMA1B1_HUMAN | Endoplasmic reticulum mannosyl-oligosaccharide 1,2-alpha-mannosidase        | MAN1B1    |
| Not defined | sp    | Q9UIK07 | MYO15_HUMAN  | Unconventional myosin-XV                                                    | MYO15A    |
| Not defined | sp    | Q9UIK08 | TF3C4_HUMAN  | General transcription factor 3C polypeptide 4                               | TF3C4     |
| Not defined | sp    | Q9UIK03 | KLK13_HUMAN  | Kallikrein-13                                                               | KLK13     |
| Not defined | sp    | Q9UIK56 | PACN3_HUMAN  | Protein kinase C and casein kinase substrate in neurons protein 3           | PACSIN3   |
| Not defined | sp    | Q9UIK04 | FBX5_HUMAN   | F-box only protein 5                                                        | FBX05     |
| Not defined | sp    | Q9UIK05 | FBX4_HUMAN   | F-box only protein 4                                                        | FBX04     |
| Not defined | sp    | Q9UIK06 | TRHDE_HUMAN  | Thyrotropin-releasing hormone-degrading ectoenzyme                          | TRHDE     |
| Not defined | sp    | Q9UIK08 | AGO2_HUMAN   | Protein argonaute-2                                                         | AGO2      |
| Not defined | sp    | Q9UIK04 | VAV3_HUMAN   | Guanine nucleotide exchange factor VAV3                                     | VAV3      |
| Not defined | sp    | Q9UIK07 | NUP50_HUMAN  | Nuclear pore complex protein Nup50                                          | NUP50     |
| Not defined | sp    | Q9UIK01 | ZHX1_HUMAN   | Zinc fingers and homeobox protein 1                                         | ZHX1      |
| Not defined | sp    | Q9UL15  | BAG5_HUMAN   | BAG family molecular chaperone regulator 5                                  | BAG5      |
| Not defined | sp    | Q9UL18  | AGO1_HUMAN   | Protein argonaute-1                                                         | AGO1      |
| Not defined | sp    | Q9UL25  | RAB21_HUMAN  | Ras-related protein Rab-21                                                  | RAB21     |
| Not defined | sp    | Q9UL26  | RB22A_HUMAN  | Ras-related protein Rab-22A                                                 | RAB22A    |
| Not defined | sp    | Q9UL42  | PNMA2_HUMAN  | Paraneoplastic antigen Ma2                                                  | PNMA2     |
| Not defined | sp    | Q9UL54  | TAOK2_HUMAN  | Serine/threonine-protein kinase TAO2                                        | TAOK2     |
| Not defined | sp    | Q9UL63  | MKLN1_HUMAN  | Muskelin                                                                    | MKLN1     |
| Not defined | sp    | Q9ULA0  | DNPEP_HUMAN  | Aspartyl aminopeptidase                                                     | DNPEP     |
| Not defined | sp    | Q9ULB1  | NRX1A_HUMAN  | Neurexin-1                                                                  | NRXN1     |
| Not defined | sp    | Q9ULB4  | CADH9_HUMAN  | Cadherin-9                                                                  | CDH9      |
| Not defined | sp    | Q9ULC0  | MUCEN_HUMAN  | Endomucin                                                                   | EMCN      |
| Not defined | sp    | Q9ULC3  | RAB23_HUMAN  | Ras-related protein Rab-23                                                  | RAB23     |
| Not defined | sp    | Q9ULC6  | PADI1_HUMAN  | Protein-arginine deiminase type-1                                           | PADI1     |
| Not defined | sp    | Q9ULF5  | S39AA_HUMAN  | Zinc transporter ZIP10                                                      | SLC39A10  |
| Not defined | sp    | Q9ULH0  | KDIS_HUMAN   | Kinase D-interacting substrate of 220 kDa                                   | KIDINS220 |
| Not defined | sp    | Q9ULH4  | LRFN2_HUMAN  | Leucine-rich repeat and fibronectin type-III domain-containing protein 2    | LRFN2     |
| Not defined | sp    | Q9ULI0  | ATD2B_HUMAN  | ATPase family AAA domain-containing protein 2B                              | ATAD2B    |
| Not defined | sp    | Q9ULI1  | NWD2_HUMAN   | NACHT and WD repeat domain-containing protein 2                             | NWD2      |
| Not defined | sp    | Q9ULI3  | HEG1_HUMAN   | Protein HEG homolog 1                                                       | HEG1      |
| Not defined | sp    | Q9ULI4  | KIF26A_HUMAN | Kinesin-like protein KIF26A                                                 | KIF26A    |
| Not defined | sp    | Q9ULI1  | ODF2L_HUMAN  | Protein BCAP                                                                | ODF2L     |
| Not defined | sp    | Q9ULK6  | RN150_HUMAN  | RING finger protein 150                                                     | RNF150    |
| Not defined | sp    | Q9ULM3  | YEATS2_HUMAN | YEATS domain-containing protein 2                                           | YEATS2    |
| Not defined | sp    | Q9ULU8  | CAP51_HUMAN  | Calcium-dependent secretion activator 1                                     | CADPS     |

Supplementary Table 2.xlsx

| Cluster     | class | UNIPROT | UNIPROT_ID    | Description                                                                 | GN       |
|-------------|-------|---------|---------------|-----------------------------------------------------------------------------|----------|
| Not defined | sp    | Q9ULV0  | MYO5B_HUMAN   | Unconventional myosin-Vb                                                    | MYO5B    |
| Not defined | sp    | Q9ULW0  | TPX2_HUMAN    | Targeting protein for Xklp2                                                 | TPX2     |
| Not defined | sp    | Q9ULX3  | NOB1_HUMAN    | RNA-binding protein NOB1                                                    | NOB1     |
| Not defined | sp    | Q9ULX6  | AKP8L_HUMAN   | A-kinase anchor protein 8-like                                              | AKAP8L   |
| Not defined | sp    | Q9ULX7  | CAH14_HUMAN   | Carbonic anhydrase 14                                                       | CA14     |
| Not defined | sp    | Q9ULZ3  | ASC_HUMAN     | Apoptosis-associated speck-like protein containing a CARD                   | PYCARD   |
| Not defined | sp    | Q9UM01  | YLAT1_HUMAN   | Y-L amino acid transporter 1                                                | SLC7A7   |
| Not defined | sp    | Q9UM22  | EPDR1_HUMAN   | Mammalian ependymin-related protein 1                                       | EPDR1    |
| Not defined | sp    | Q9UMD9  | COHA1_HUMAN   | Collagen alpha-1(XVII) chain                                                | COL17A1  |
| Not defined | sp    | Q9UMF0  | ICAM5_HUMAN   | Intercellular adhesion molecule 5                                           | ICAM5    |
| Not defined | sp    | Q9UMR2  | DD19B_HUMAN   | ATP-dependent RNA helicase DDX19B                                           | DDX19B   |
| Not defined | sp    | Q9UMR5  | PPT2_HUMAN    | Lysosomal thioesterase PPT2                                                 | PPT2     |
| Not defined | sp    | Q9UMS0  | NFU1_HUMAN    | NFU1 iron-sulfur cluster scaffold homolog, mitochondrial                    | NFU1     |
| Not defined | sp    | Q9UMS4  | PRP19_HUMAN   | Pre-mRNA-processing factor 19                                               | PRPF19   |
| Not defined | sp    | Q9UMX5  | NENF_HUMAN    | Neudesin                                                                    | NENF     |
| Not defined | sp    | Q9UMX9  | S45A2_HUMAN   | Membrane-associated transporter protein                                     | SLC45A2  |
| Not defined | sp    | Q9UMZ2  | SYNRG_HUMAN   | Synergin gamma                                                              | SYNRG    |
| Not defined | sp    | Q9UN79  | SOX13_HUMAN   | Transcription factor SOX-13                                                 | SOX13    |
| Not defined | sp    | Q9UN81  | LORF1_HUMAN   | LINE-1 retrotransposable element ORF1 protein                               | L1RE1    |
| Not defined | sp    | Q9UNE7  | CHIP_HUMAN    | E3 ubiquitin-protein ligase CHIP                                            | STUB1    |
| Not defined | sp    | Q9UNF1  | MAGD2_HUMAN   | Melanoma-associated antigen D2                                              | MAGED2   |
| Not defined | sp    | Q9UNH7  | SNX6_HUMAN    | Sorting nexin-6                                                             | SNX6     |
| Not defined | sp    | Q9UNI6  | DUS12_HUMAN   | Dual specificity protein phosphatase 12                                     | DUSP12   |
| Not defined | sp    | Q9UNK0  | STX8_HUMAN    | Syntaxin-8                                                                  | STX8     |
| Not defined | sp    | Q9UNK9  | ANGE1_HUMAN   | Protein angel homolog 1                                                     | ANGEL1   |
| Not defined | sp    | Q9UNL2  | SSRG_HUMAN    | Translocon-associated protein subunit gamma                                 | SSR3     |
| Not defined | sp    | Q9UNL4  | ING4_HUMAN    | Inhibitor of growth protein 4                                               | ING4     |
| Not defined | sp    | Q9UNM6  | PSD13_HUMAN   | 26S proteasome non-ATPase regulatory subunit 13                             | PSMD13   |
| Not defined | sp    | Q9UNN5  | FAF1_HUMAN    | FAS-associated factor 1                                                     | FAF1     |
| Not defined | sp    | Q9UNN8  | EPCR_HUMAN    | Endothelial protein C receptor                                              | PROCR    |
| Not defined | sp    | Q9UNS2  | CSN3_HUMAN    | COP9 signalosome complex subunit 3                                          | COP3     |
| Not defined | sp    | Q9UNW1  | MINP1_HUMAN   | Multiple inositol polyphosphate phosphatase 1                               | MINPP1   |
| Not defined | sp    | Q9UNX3  | RL26L_HUMAN   | 60S ribosomal protein L26-like 1                                            | RPL26L1  |
| Not defined | sp    | Q9UNX9  | KCJ14_HUMAN   | ATP-sensitive inward rectifier potassium channel 14                         | KCNJ14   |
| Not defined | sp    | Q9UNZ5  | L10K_HUMAN    | Leydig cell tumor 10 kDa protein homolog                                    | C19orf53 |
| Not defined | sp    | Q9UP65  | PA24C_HUMAN   | Cytosolic phospholipase A2 gamma                                            | PLA2G4C  |
| Not defined | sp    | Q9UP1E  | SRPK3_HUMAN   | SRSF protein kinase 3                                                       | SRPK3    |
| Not defined | sp    | Q9UPN3  | MACF1_HUMAN   | Microtubule-actin cross-linking factor 1, isoforms 1/2/3/5                  | MACF1    |
| Not defined | sp    | Q9UPN4  | CP131_HUMAN   | Centrosomal protein of 131 kDa                                              | CEP131   |
| Not defined | sp    | Q9UPN6  | SCAF8_HUMAN   | SR-related and CTD-associated factor 8                                      | SCAF8    |
| Not defined | sp    | Q9UPP2  | IQEC3_HUMAN   | IQ motif and SEC7 domain-containing protein 3                               | IQSEC3   |
| Not defined | sp    | Q9UPR3  | SMG5_HUMAN    | Protein SMG5                                                                | SMG5     |
| Not defined | sp    | Q9UPM8  | ANKRD26_HUMAN | Ankyrin repeat domain-containing protein 26                                 | ANKRD26  |
| Not defined | sp    | Q9UPT6  | JIP3_HUMAN    | C-Jun-amino-terminal kinase-interacting protein 3                           | MAPK8IP3 |
| Not defined | sp    | Q9UP18  | ZC3H4_HUMAN   | Zinc finger CCH domain-containing protein 4                                 | ZC3H4    |
| Not defined | sp    | Q9UP19  | UBP22_HUMAN   | Ubiquitin carboxyl-terminal hydrolase 22                                    | USP22    |
| Not defined | sp    | Q9UPV0  | CE164_HUMAN   | Centrosomal protein of 164 kDa                                              | CEP164   |
| Not defined | sp    | Q9UPY3  | DICER_HUMAN   | Endoribonuclease Dicer                                                      | DICER1   |
| Not defined | sp    | Q9UPY8  | MARE3_HUMAN   | Microtubule-associated protein RP/EB family member 3                        | MAPRE3   |
| Not defined | sp    | Q9UPZ9  | CILK1_HUMAN   | Serine/threonine-protein kinase ICK                                         | CILK1    |
| Not defined | sp    | Q9UQ16  | DYN3_HUMAN    | Dynamin-3                                                                   | DNM3     |
| Not defined | sp    | Q9UQ26  | RIMS2_HUMAN   | Regulating synaptic membrane exocytosis protein 2                           | RIMS2    |
| Not defined | sp    | Q9UQ88  | CD11A_HUMAN   | Cyclin-dependent kinase 11A                                                 | CDK11A   |
| Not defined | sp    | Q9UQ88  | BAIP2_HUMAN   | Brain-specific angiogenesis inhibitor 1-associated protein 2                | BAIAP2   |
| Not defined | sp    | Q9UQE7  | SMC3_HUMAN    | Structural maintenance of chromosomes protein 3                             | SMC3     |
| Not defined | sp    | Q9UQN3  | CHM2B_HUMAN   | Charged multivesicular body protein 2b                                      | CHMP2B   |
| Not defined | sp    | Q9Y216  | MTMR7_HUMAN   | Myotubularin-related protein 7                                              | MTMR7    |
| Not defined | sp    | Q9Y217  | MTMR6_HUMAN   | Myotubularin-related protein 6                                              | MTMR6    |
| Not defined | sp    | Q9Y221  | NIP7_HUMAN    | 60S ribosome subunit biogenesis protein NIP7 homolog                        | NIP7     |
| Not defined | sp    | Q9Y223  | GLCNE_HUMAN   | Bifunctional UDP-N-acetylglucosamine 2-epimerase/N-acetylmannosamine kinase | GENE     |
| Not defined | sp    | Q9Y228  | T3JAM_HUMAN   | TRAF3-interacting JNK-activating modulator                                  | TRAF3IP3 |
| Not defined | sp    | Q9Y233  | PDE10_HUMAN   | cAMP and cAMP-inhibited cGMP 3',5'-cyclic phosphodiesterase 10A             | PDE10A   |
| Not defined | sp    | Q9Y238  | DLEC1_HUMAN   | Deleted in lung and esophageal cancer protein 1                             | DLEC1    |
| Not defined | sp    | Q9Y244  | POMP_HUMAN    | Proteasome maturation protein                                               | POMP     |
| Not defined | sp    | Q9Y247  | FAM50B_HUMAN  | Protein FAM50B                                                              | FAM50B   |
| Not defined | sp    | Q9Y248  | PSF2_HUMAN    | DNA replication complex GINS protein PSF2                                   | GINS2    |
| Not defined | sp    | Q9Y250  | LZTS1_HUMAN   | Leucine zipper putative tumor suppressor 1                                  | LZTS1    |
| Not defined | sp    | Q9Y259  | CHKB_HUMAN    | Choline/ethanolamine kinase                                                 | CHKB     |
| Not defined | sp    | Q9Y262  | EIF3L_HUMAN   | Eukaryotic translation initiation factor 3 subunit L                        | EIF3L    |
| Not defined | sp    | Q9Y282  | ERGI3_HUMAN   | Endoplasmic reticulum-Golgi intermediate compartment protein 3              | ERGI3    |
| Not defined | sp    | Q9Y287  | ITM2B_HUMAN   | Integral membrane protein 2B                                                | ITM2B    |
| Not defined | sp    | Q9Y291  | RT33_HUMAN    | 28S ribosomal protein S33, mitochondrial                                    | MRP533   |
| Not defined | sp    | Q9Y294  | ASF1A_HUMAN   | Histone chaperone ASF1A                                                     | ASF1A    |
| Not defined | sp    | Q9Y295  | DRG1_HUMAN    | Developmentally-regulated GTP-binding protein 1                             | DRG1     |
| Not defined | sp    | Q9Y296  | TPPC4_HUMAN   | Trafficking protein particle complex subunit 4                              | TRAPP4   |
| Not defined | sp    | Q9Y2B4  | TP53G5_HUMAN  | TP53-target gene 5 protein                                                  | TP53TG5  |
| Not defined | sp    | Q9Y2C4  | EXOG_HUMAN    | Nuclease EXOG, mitochondrial                                                | EXOG     |
| Not defined | sp    | Q9Y2D4  | EXC6B_HUMAN   | Exocyst complex component 6B                                                | EXOC6B   |
| Not defined | sp    | Q9Y2E5  | MA2B2_HUMAN   | Epididymis-specific alpha-mannosidase                                       | MAN2B2   |
| Not defined | sp    | Q9Y2F5  | ICE1_HUMAN    | Little elongation complex subunit 1                                         | ICE1     |
| Not defined | sp    | Q9Y2G4  | ANKR6_HUMAN   | Ankyrin repeat domain-containing protein 6                                  | ANKRD6   |
| Not defined | sp    | Q9Y2G5  | OFUT2_HUMAN   | GDP-fucose protein O-fucosyltransferase 2                                   | POFUT2   |
| Not defined | sp    | Q9Y2G7  | ZFP30_HUMAN   | Zinc finger protein 30 homolog                                              | ZFP30    |
| Not defined | sp    | Q9Y2G8  | DIC16_HUMAN   | DnaI homolog subfamily C member 16                                          | DNAIC16  |
| Not defined | sp    | Q9Y2H0  | DLGPA_HUMAN   | Disks large-associated protein 4                                            | DLGAP4   |
| Not defined | sp    | Q9Y2H5  | PKHA6_HUMAN   | Pleckstrin homology domain-containing family A member 6                     | PLEKHA6  |
| Not defined | sp    | Q9Y2H6  | FND3A_HUMAN   | Fibronectin type-III domain-containing protein 3A                           | FNDC3A   |
| Not defined | sp    | Q9Y2I1  | NISCH_HUMAN   | Nischarin                                                                   | NISCH    |
| Not defined | sp    | Q9Y2J2  | E41L3_HUMAN   | Band 4.1-like protein 3                                                     | EPB41L3  |
| Not defined | sp    | Q9Y2J8  | PADI2_HUMAN   | Protein-arginine deiminase type-2                                           | PADI2    |

Supplementary Table 2.xlsx

| Cluster     | class | UNIPROT | UNIPROT_ID   | Description                                                                       | GN       |
|-------------|-------|---------|--------------|-----------------------------------------------------------------------------------|----------|
| Not defined | sp    | Q9Y2K1  | ZBTB1_HUMAN  | Zinc finger and BTB domain-containing protein 1                                   | ZBTB1    |
| Not defined | sp    | Q9Y2K2  | SIK3_HUMAN   | Serine/threonine-protein kinase SIK3                                              | SIK3     |
| Not defined | sp    | Q9Y2L1  | RRP44_HUMAN  | Exosome complex exonuclease RRP44                                                 | DIS3     |
| Not defined | sp    | Q9Y2Q3  | GSTK1_HUMAN  | Glutathione S-transferase kappa 1                                                 | GSTK1    |
| Not defined | sp    | Q9Y2Q5  | LTOR2_HUMAN  | Ragulator complex protein LAMTOR2                                                 | LAMTOR2  |
| Not defined | sp    | Q9Y2R4  | DDX52_HUMAN  | Probable ATP-dependent RNA helicase DDX52                                         | DDX52    |
| Not defined | sp    | Q9Y2R5  | RT17_HUMAN   | 28S ribosomal protein S17, mitochondrial                                          | MRPS17   |
| Not defined | sp    | Q9Y2S6  | TMA7_HUMAN   | Translation machinery-associated protein 7                                        | TMA7     |
| Not defined | sp    | Q9Y2S7  | PDIP2_HUMAN  | Polymerase delta-interacting protein 2                                            | POLDIP2  |
| Not defined | sp    | Q9Y2T4  | ZABG_HUMAN   | Serine/threonine-protein phosphatase 2A 55 kDa regulatory subunit B gamma isoform | PPP2R2C  |
| Not defined | sp    | Q9Y2U8  | MAN1_HUMAN   | Inner nuclear membrane protein Man1                                               | LEM3     |
| Not defined | sp    | Q9Y2U9  | KLDC2_HUMAN  | Kelch domain-containing protein 2                                                 | KLDC2    |
| Not defined | sp    | Q9Y2X3  | NOP58_HUMAN  | Nucleolar protein 58                                                              | NOP58    |
| Not defined | sp    | Q9Y2X9  | ZN281_HUMAN  | Zinc finger protein 281                                                           | ZNF281   |
| Not defined | sp    | Q9Y2Y0  | AR2BP_HUMAN  | ADP-ribosylation factor-like protein 2-binding protein                            | ARL2BP   |
| Not defined | sp    | Q9Y2Z0  | SGT1_HUMAN   | Protein SGT1 homolog                                                              | SUGT1    |
| Not defined | sp    | Q9Y2Z4  | SYYM_HUMAN   | Tyrosine-tRNA ligase, mitochondrial                                               | YARS2    |
| Not defined | sp    | Q9Y2Z9  | COQ6_HUMAN   | Ubiquinone biosynthesis monooxygenase COQ6, mitochondrial                         | COQ6     |
| Not defined | sp    | Q9Y305  | ACOT9_HUMAN  | Acyl-coenzyme A thioesterase 9, mitochondrial                                     | ACOT9    |
| Not defined | sp    | Q9Y314  | NOSIP_HUMAN  | Nitric oxide synthase-interacting protein                                         | NOSIP    |
| Not defined | sp    | Q9Y315  | DEOC_HUMAN   | Deoxyribose-phosphate aldolase                                                    | DERA     |
| Not defined | sp    | Q9Y316  | MEMO1_HUMAN  | Protein MEMO1                                                                     | MEMO1    |
| Not defined | sp    | Q9Y320  | TMX2_HUMAN   | Thioredoxin-related transmembrane protein 2                                       | TMX2     |
| Not defined | sp    | Q9Y342  | PLLP_HUMAN   | Plasmolipin                                                                       | PLLP     |
| Not defined | sp    | Q9Y365  | STA10_HUMAN  | START domain-containing protein 10                                                | STAR10   |
| Not defined | sp    | Q9Y371  | SHLB1_HUMAN  | Endophilin-B1                                                                     | SH3GLB1  |
| Not defined | sp    | Q9Y375  | CIA30_HUMAN  | Complex I intermediate-associated protein 30, mitochondrial                       | NDUF4F1  |
| Not defined | sp    | Q9Y376  | CAB39_HUMAN  | Calcium-binding protein 39                                                        | CAB39    |
| Not defined | sp    | Q9Y388  | RBMX2_HUMAN  | RNA-binding motif protein, X-linked 2                                             | RBMX2    |
| Not defined | sp    | Q9Y399  | RT02_HUMAN   | 28S ribosomal protein S2, mitochondrial                                           | MRPS2    |
| Not defined | sp    | Q9Y3A5  | SBDS_HUMAN   | Ribosome maturation protein SBDS                                                  | SBDS     |
| Not defined | sp    | Q9Y3A6  | TMED5_HUMAN  | Transmembrane emp24 domain-containing protein 5                                   | TMED5    |
| Not defined | sp    | Q9Y3B1  | PLD3B_HUMAN  | PRELI domain containing protein 3B                                                | PRELID3B |
| Not defined | sp    | Q9Y3B2  | EXOS1_HUMAN  | Exosome complex component CSL4                                                    | EXOSC1   |
| Not defined | sp    | Q9Y3B4  | SF3B6_HUMAN  | Splicing factor 3B subunit 6                                                      | SF3B6    |
| Not defined | sp    | Q9Y3B9  | RRP15_HUMAN  | RRP15-like protein                                                                | RRP15    |
| Not defined | sp    | Q9Y3C0  | WASC3_HUMAN  | WASH complex subunit 3                                                            | WASHC3   |
| Not defined | sp    | Q9Y3C5  | RNF11_HUMAN  | RING finger protein 11                                                            | RNF11    |
| Not defined | sp    | Q9Y3C8  | UFC1_HUMAN   | Ubiquitin-fold modifier-conjugating enzyme 1                                      | UFC1     |
| Not defined | sp    | Q9Y3D0  | CIA2B_HUMAN  | Cytosolic iron-sulfur assembly component 2B                                       | CIA2B    |
| Not defined | sp    | Q9Y3D2  | MSRB2_HUMAN  | Methionine-R-sulfoxide reductase B2, mitochondrial                                | MSRB2    |
| Not defined | sp    | Q9Y3D3  | RT16_HUMAN   | 28S ribosomal protein S16, mitochondrial                                          | MRPS16   |
| Not defined | sp    | Q9Y3D5  | RT18C_HUMAN  | 28S ribosomal protein S18c, mitochondrial                                         | MRPS18C  |
| Not defined | sp    | Q9Y3D8  | KAD6_HUMAN   | Adenylate kinase isoenzyme 6                                                      | AK6      |
| Not defined | sp    | Q9Y3E0  | GOT1B_HUMAN  | Vesicle transport protein GOT1B                                                   | GOLT1B   |
| Not defined | sp    | Q9Y3E2  | BOLA1_HUMAN  | BoLA-like protein 1                                                               | BOLA1    |
| Not defined | sp    | Q9Y3E5  | PTH2_HUMAN   | Peptidyl-tRNA hydrolase 2, mitochondrial                                          | PTRH2    |
| Not defined | sp    | Q9Y3E7  | CHMP3_HUMAN  | Charged multivesicular body protein 3                                             | CHMP3    |
| Not defined | sp    | Q9Y3I0  | RTCB_HUMAN   | RNA-splicing ligase RtcB homolog                                                  | RTCB     |
| Not defined | sp    | Q9Y3I1  | FBX7_HUMAN   | F-box only protein 7                                                              | FBXO7    |
| Not defined | sp    | Q9Y3I3  | 3BP1_HUMAN   | SH3 domain-binding protein 1                                                      | SH3BP1   |
| Not defined | sp    | Q9Y3Q3  | TMED3_HUMAN  | Transmembrane emp24 domain-containing protein 3                                   | TMED3    |
| Not defined | sp    | Q9Y3Q8  | T2D4_HUMAN   | TSC22 domain family protein 4                                                     | TSC22D4  |
| Not defined | sp    | Q9Y3S1  | WNK2_HUMAN   | Serine/threonine-protein kinase WNK2                                              | WNK2     |
| Not defined | sp    | Q9Y3S2  | ZN330_HUMAN  | Zinc finger protein 330                                                           | ZNF330   |
| Not defined | sp    | Q9Y3X0  | CCDC9_HUMAN  | Coiled-coil domain-containing protein 9                                           | CCDC9    |
| Not defined | sp    | Q9Y3Z3  | SAMH1_HUMAN  | Deoxynucleoside triphosphate triphosphohydrolase SAMHD1                           | SAMHD1   |
| Not defined | sp    | Q9Y421  | FA32A_HUMAN  | Protein FAM32A                                                                    | FAM32A   |
| Not defined | sp    | Q9Y446  | PKP3_HUMAN   | Plakophilin-3                                                                     | PKP3     |
| Not defined | sp    | Q9Y448  | SKAP_HUMAN   | Small kinetochore-associated protein                                              | KNSTRN   |
| Not defined | sp    | Q9Y450  | HBS1L_HUMAN  | HBS1-like protein                                                                 | HBS1L    |
| Not defined | sp    | Q9Y466  | NR2E1_HUMAN  | Nuclear receptor subfamily 2 group E member 1                                     | NR2E1    |
| Not defined | sp    | Q9Y478  | AAKB1_HUMAN  | 5'-AMP-activated protein kinase subunit beta-1                                    | PRKAB1   |
| Not defined | sp    | Q9Y485  | DMXL1_HUMAN  | DmX-like protein 1                                                                | DMXL1    |
| Not defined | sp    | Q9Y4B5  | MTCL1_HUMAN  | Microtubule cross-linking factor 1                                                | MTCL1    |
| Not defined | sp    | Q9Y4B6  | DCAF1_HUMAN  | DDB1- and CUL4-associated factor 1                                                | DCAF1    |
| Not defined | sp    | Q9Y4C2  | TCAF1_HUMAN  | TRPM8 channel-associated factor 1                                                 | TCAF1    |
| Not defined | sp    | Q9Y4C5  | CHST2_HUMAN  | Carbohydrate sulfotransferase 2                                                   | CHST2    |
| Not defined | sp    | Q9Y4D7  | PLXD1_HUMAN  | Plexin-D1                                                                         | PLXND1   |
| Not defined | sp    | Q9Y4D8  | HECTD4_HUMAN | Probable E3 ubiquitin-protein ligase HECTD4                                       | HECTD4   |
| Not defined | sp    | Q9Y4E1  | WAC2C_HUMAN  | WASH complex subunit 2C                                                           | WASHC2C  |
| Not defined | sp    | Q9Y4E8  | UBP15_HUMAN  | Ubiquitin carboxyl-terminal hydrolase 15                                          | USP15    |
| Not defined | sp    | Q9Y4F5  | C170B_HUMAN  | Centrosomal protein of 170 kDa protein B                                          | CEP170B  |
| Not defined | sp    | Q9Y4G2  | PKHM1_HUMAN  | Pleckstrin homology domain-containing family M member 1                           | PLEKHM1  |
| Not defined | sp    | Q9Y4G8  | RPGF2_HUMAN  | Rap guanine nucleotide exchange factor 2                                          | RAPGEF2  |
| Not defined | sp    | Q9Y4K0  | LOXL2_HUMAN  | Lysyl oxidase homolog 2                                                           | LOXL2    |
| Not defined | sp    | Q9Y4K1  | CRBG1_HUMAN  | Beta/gamma crystallin domain-containing protein 1                                 | CRYBG1   |
| Not defined | sp    | Q9Y4K3  | TRAF6_HUMAN  | TNF receptor-associated factor 6                                                  | TRAF6    |
| Not defined | sp    | Q9Y4P3  | TBL2_HUMAN   | Transducin beta-like protein 2                                                    | TBL2     |
| Not defined | sp    | Q9Y4R8  | TELO2_HUMAN  | Telomere length regulation protein TEL2 homolog                                   | TELO2    |
| Not defined | sp    | Q9Y4W6  | AFG32_HUMAN  | AFG3-like protein 2                                                               | AFG3L2   |
| Not defined | sp    | Q9Y4Y9  | LSM5_HUMAN   | U6 snRNA-associated Sm-like protein LSm5                                          | LSM5     |
| Not defined | sp    | Q9Y512  | SAM50_HUMAN  | Sorting and assembly machinery component 50 homolog                               | SAMM50   |
| Not defined | sp    | Q9Y520  | PRRC2C_HUMAN | Protein PRRC2C                                                                    | PRRC2C   |
| Not defined | sp    | Q9Y530  | OARD1_HUMAN  | ADP-ribose glycohydrolase OARD1                                                   | OARD1    |
| Not defined | sp    | Q9Y547  | IFT25_HUMAN  | Intraflagellar transport protein 25 homolog                                       | HSPB11   |
| Not defined | sp    | Q9Y561  | LRP12_HUMAN  | Low-density lipoprotein receptor-related protein 12                               | LRP12    |
| Not defined | sp    | Q9Y570  | PPME1_HUMAN  | Protein phosphatase methyltransferase 1                                           | PPME1    |
| Not defined | sp    | Q9Y576  | ASB1_HUMAN   | Ankyrin repeat and SOCS box protein 1                                             | ASB1     |
| Not defined | sp    | Q9Y580  | RBM7_HUMAN   | RNA-binding protein 7                                                             | RBM7     |

Supplementary Table 2.xlsx

| Cluster     | class | UNIPROT | UNIPROT_ID   | Description                                                     | GN      |
|-------------|-------|---------|--------------|-----------------------------------------------------------------|---------|
| Not defined | sp    | Q9Y584  | TIM22_HUMAN  | Mitochondrial import inner membrane translocase subunit Tim22   | TIMM22  |
| Not defined | sp    | Q9Y5B9  | SP16H_HUMAN  | FACT complex subunit SPT16                                      | SUPT16H |
| Not defined | sp    | Q9Y5E7  | PCDB2_HUMAN  | Protocadherin beta-2                                            | PCDHB2  |
| Not defined | sp    | Q9Y5F3  | PCDB1_HUMAN  | Protocadherin beta-1                                            | PCDHB1  |
| Not defined | sp    | Q9Y5F6  | PCDGM_HUMAN  | Protocadherin gamma-C5                                          | PCDHGCS |
| Not defined | sp    | Q9Y5G4  | PCDG9_HUMAN  | Protocadherin gamma-A9                                          | PCDHGA9 |
| Not defined | sp    | Q9Y5H4  | PCDG1_HUMAN  | Protocadherin gamma-A1                                          | PCDHGA1 |
| Not defined | sp    | Q9Y5I2  | PCDAA_HUMAN  | Protocadherin alpha-10                                          | PCDHA10 |
| Not defined | sp    | Q9Y5I4  | PCDC2_HUMAN  | Protocadherin alpha-C2                                          | PCDHAC2 |
| Not defined | sp    | Q9Y5J6  | T10B_HUMAN   | Mitochondrial import inner membrane translocase subunit Tim10 B | TIMM10B |
| Not defined | sp    | Q9Y5J9  | TIM8B_HUMAN  | Mitochondrial import inner membrane translocase subunit Tim8 B  | TIMM8B  |
| Not defined | sp    | Q9Y5K3  | PCY1B_HUMAN  | Choline-phosphate cytidyltransferase B                          | PCYT1B  |
| Not defined | sp    | Q9Y5K5  | UCHL5_HUMAN  | Ubiquitin carboxyl-terminal hydrolase isozyme L5                | UCHL5   |
| Not defined | sp    | Q9Y5M8  | SRPRB_HUMAN  | Signal recognition particle receptor subunit beta               | SRPRB   |
| Not defined | sp    | Q9Y5N5  | N6MT1_HUMAN  | Methyltransferase N6AMT1                                        | N6AMT1  |
| Not defined | sp    | Q9Y5P4  | CERT_HUMAN   | Ceramide transfer protein                                       | CERT1   |
| Not defined | sp    | Q9Y5P6  | GMPPB_HUMAN  | Mannose-1-phosphate guanyltransferase beta                      | GMPPB   |
| Not defined | sp    | Q9Y5Q0  | FADS3_HUMAN  | Fatty acid desaturase 3                                         | FADS3   |
| Not defined | sp    | Q9Y5Q8  | TF3C5_HUMAN  | General transcription factor 3C polypeptide 5                   | GTFC35  |
| Not defined | sp    | Q9Y5T4  | DJC15_HUMAN  | DnaI homolog subfamily C member 15                              | DNAIC15 |
| Not defined | sp    | Q9Y5U2  | TSSC4_HUMAN  | Protein TSSC4                                                   | TSSC4   |
| Not defined | sp    | Q9Y5U9  | IR3IP_HUMAN  | Immediate early response 3-interacting protein 1                | IER3IP1 |
| Not defined | sp    | Q9Y5W5  | WIF1_HUMAN   | Wnt inhibitory factor 1                                         | WIF1    |
| Not defined | sp    | Q9Y5W7  | SNX14_HUMAN  | Sorting nexin-14                                                | SNX14   |
| Not defined | sp    | Q9Y5X3  | SNX5_HUMAN   | Sorting nexin-5                                                 | SNX5    |
| Not defined | sp    | Q9Y5Y6  | ST14_HUMAN   | Suppressor of tumorigenicity 14 protein                         | ST14    |
| Not defined | sp    | Q9Y5Z4  | HEBP2_HUMAN  | Heme-binding protein 2                                          | HEBP2   |
| Not defined | sp    | Q9Y605  | MOFA1_HUMAN  | MORF4 family-associated protein 1                               | MRFAP1  |
| Not defined | sp    | Q9Y606  | TRUA_HUMAN   | tRNA pseudouridine synthase A                                   | PUS1    |
| Not defined | sp    | Q9Y608  | LRRF2_HUMAN  | Leucine-rich repeat flightless-interacting protein 2            | LRRFP2  |
| Not defined | sp    | Q9Y613  | FHOD1_HUMAN  | FH1/FH2 domain-containing protein 1                             | FHOD1   |
| Not defined | sp    | Q9Y618  | NCOR2_HUMAN  | Nuclear receptor corepressor 2                                  | NCOR2   |
| Not defined | sp    | Q9Y646  | CBPO_HUMAN   | Carboxypeptidase Q                                              | CPQ     |
| Not defined | sp    | Q9Y653  | AGRG1_HUMAN  | Adhesion G-protein coupled receptor G1                          | ADGRG1  |
| Not defined | sp    | Q9Y657  | SPIN1_HUMAN  | Spindlin-1                                                      | SPIN1   |
| Not defined | sp    | Q9Y676  | RT18B_HUMAN  | 28S ribosomal protein S18b, mitochondrial                       | MRPS18B |
| Not defined | sp    | Q9Y678  | COPG1_HUMAN  | Coatomer subunit gamma-1                                        | COPG1   |
| Not defined | sp    | Q9Y680  | FKBP7_HUMAN  | Peptidyl-prolyl cis-trans isomerase FKBP7                       | FKBP7   |
| Not defined | sp    | Q9Y689  | ARL5A_HUMAN  | ADP-ribosylation factor-like protein 5A                         | ARL5A   |
| Not defined | sp    | Q9Y692  | GMEB1_HUMAN  | Glucocorticoid modulatory element-binding protein 1             | GMEB1   |
| Not defined | sp    | Q9Y696  | CLIC4_HUMAN  | Chloride intracellular channel protein 4                        | CLIC4   |
| Not defined | sp    | Q9Y697  | NFS1_HUMAN   | Cysteine desulfurase, mitochondrial                             | NFS1    |
| Not defined | sp    | Q9Y6A4  | CFA20_HUMAN  | Cilia- and flagella-associated protein 20                       | CFAP20  |
| Not defined | sp    | Q9Y6A5  | TACC3_HUMAN  | Transforming acidic coiled-coil-containing protein 3            | TACC3   |
| Not defined | sp    | Q9Y6A9  | SPCS1_HUMAN  | Signal peptidase complex subunit 1                              | SPCS1   |
| Not defined | sp    | Q9Y6C9  | MTCH2_HUMAN  | Mitochondrial carrier homolog 2                                 | MTCH2   |
| Not defined | sp    | Q9Y6D9  | MD1L1_HUMAN  | Mitotic spindle assembly checkpoint protein MAD1                | MAD1L1  |
| Not defined | sp    | Q9Y6E0  | STK24_HUMAN  | Serine/threonine-protein kinase 24                              | STK24   |
| Not defined | sp    | Q9Y6E2  | BZW2_HUMAN   | Basic leucine zipper and W2 domain-containing protein 2         | BZW2    |
| Not defined | sp    | Q9Y6G3  | RM42_HUMAN   | 39S ribosomal protein L42, mitochondrial                        | MRPL42  |
| Not defined | sp    | Q9Y6K8  | KAD5_HUMAN   | Adenylate kinase isoenzyme 5                                    | AK5     |
| Not defined | sp    | Q9Y6M4  | KC1G3_HUMAN  | Casein kinase I isoform gamma-3                                 | CSNK1G3 |
| Not defined | sp    | Q9Y6M5  | ZNT1_HUMAN   | Zinc transporter 1                                              | SLC30A1 |
| Not defined | sp    | Q9Y6M7  | S4A7_HUMAN   | Sodium bicarbonate cotransporter 3                              | SLCA47  |
| Not defined | sp    | Q9Y6M9  | NDUB9_HUMAN  | NADH dehydrogenase [ubiquinone] 1 beta subcomplex subunit 9     | NDUF9   |
| Not defined | sp    | Q9Y6N5  | SQOR_HUMAN   | Sulfide:quinone oxidoreductase, mitochondrial                   | SQOR    |
| Not defined | sp    | Q9Y6N7  | ROBO1_HUMAN  | Roundabout homolog 1                                            | ROBO1   |
| Not defined | sp    | Q9Y6N8  | CAD10_HUMAN  | Cadherin-10                                                     | CDH10   |
| Not defined | sp    | Q9Y6Q5  | AP1M2_HUMAN  | AP-1 complex subunit mu-2                                       | AP1M2   |
| Not defined | sp    | Q9Y6R4  | MAP3K4_HUMAN | Mitogen-activated protein kinase kinase kinase 4                | MAP3K4  |
| Not defined | sp    | Q9Y6W3  | CAN7_HUMAN   | Calpain-7                                                       | CAPN7   |
| Not defined | sp    | Q9Y6W5  | WASF2_HUMAN  | Wiskott-Aldrich syndrome protein family member 2                | WASF2   |
| Not defined | sp    | Q9Y6X5  | ENPP4_HUMAN  | Bis[5'-adenosyl]-triphosphatase ENPP4                           | ENPP4   |
| Not defined | sp    | Q9Y6Y8  | S23IP_HUMAN  | SEC23-interacting protein                                       | SEC23IP |
| Not defined | sp    | U3KPV4  | A3LT2_HUMAN  | Alpha-1,3-galactosyltransferase 2                               | A3GALT2 |
