# Supplementary material for: Extracellular Vesicles from Pancreatic Cancer Stem Cells Lead an Intratumor Communication Network (EVNet) to fuel tumour progression
Source: HighWire-hosted journal article supplement (doi:10.1136/gutjnl-2021-324994), 2022-01-10
Supplement: gutjnl-2021-324994supp018_data_supplement.pdf [file gutjnl-2021-324994supp018_data_supplement.pdf]

Supplementary Table 7. Baseline demographic and clinical characteristics of the study population in the correlation between serum agrin-positive exosomes and serum CD133-positive exosomes (n=106).

| Cohort characteristics      | PDAC (n/%)  |
|-----------------------------|-------------|
| <b>Sex</b>                  |             |
| Male                        | 58 (54.7)   |
| Female                      | 48 (45.3)   |
| <b>Age, years (mean±SD)</b> | 68.2 ± 10.4 |
| <b>Stage</b>                |             |
| IA                          | 6 (5.7)     |
| IB                          | 17 (16.0)   |
| IIA                         | 5 (4.7)     |
| IIB                         | 11 (10.4)   |
| III                         | 32 (30.2)   |
| IV                          | 35 (33.0)   |

PDAC – Pancreatic Ductal Adenocarcinoma; SD – Standard Deviation
